# Supplementary material
Source: PubMed Central journal article supplement (PMC4235366)
Supplement: ja509786v_si_002.pdf [file ja509786v_si_002.pdf]

# **Enantioselective CuH-Catalyzed Anti-Markovnikov Hydroamination of 1,1-Disubstituted Alkenes**

**Shaolin Zhu and Stephen L. Buchwald\***

*Department of Chemistry, Massachusetts Institute of Technology*

*Cambridge, Massachusetts 02139, United States*

## **Supporting Information**

**Spectra and HPLC trace**

### **Contents**

|               |     |
|---------------|-----|
| 1. Spectra    | S2  |
| 2. HPLC Trace | S65 |

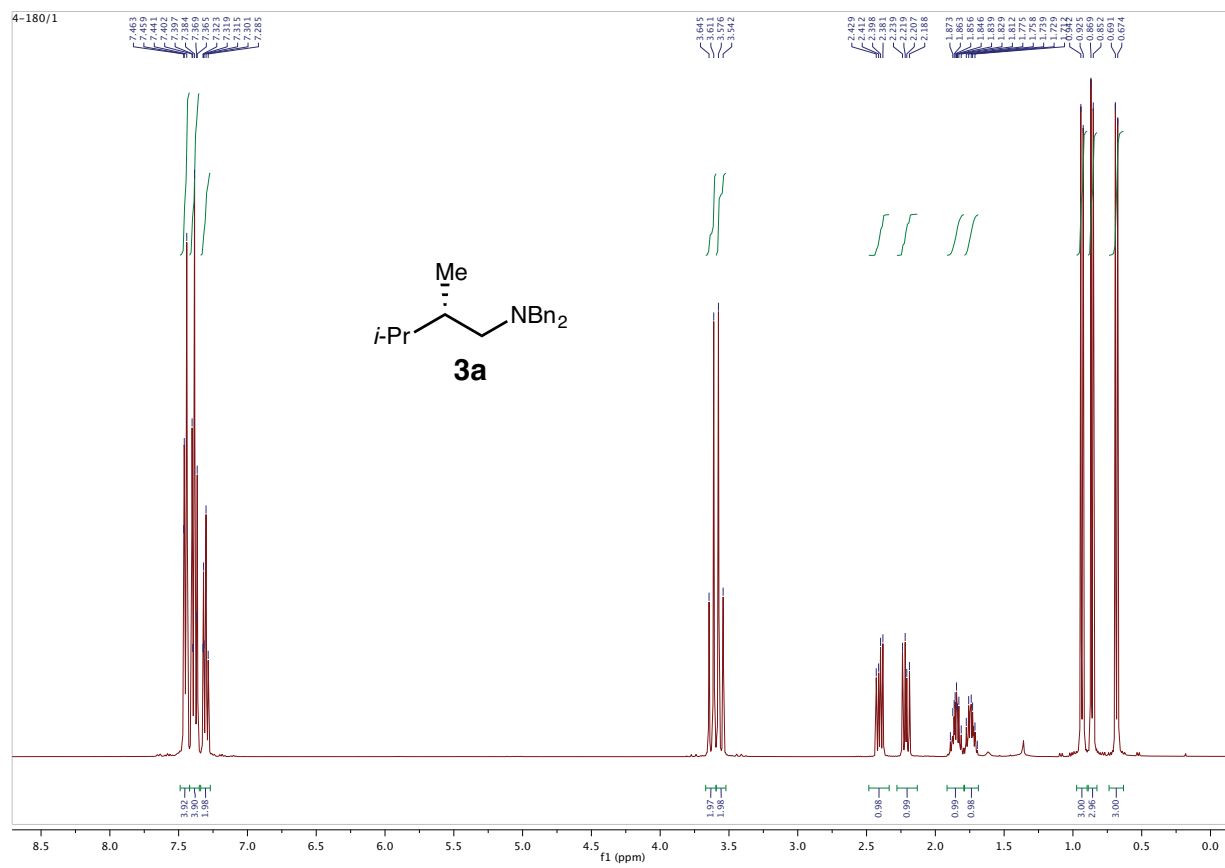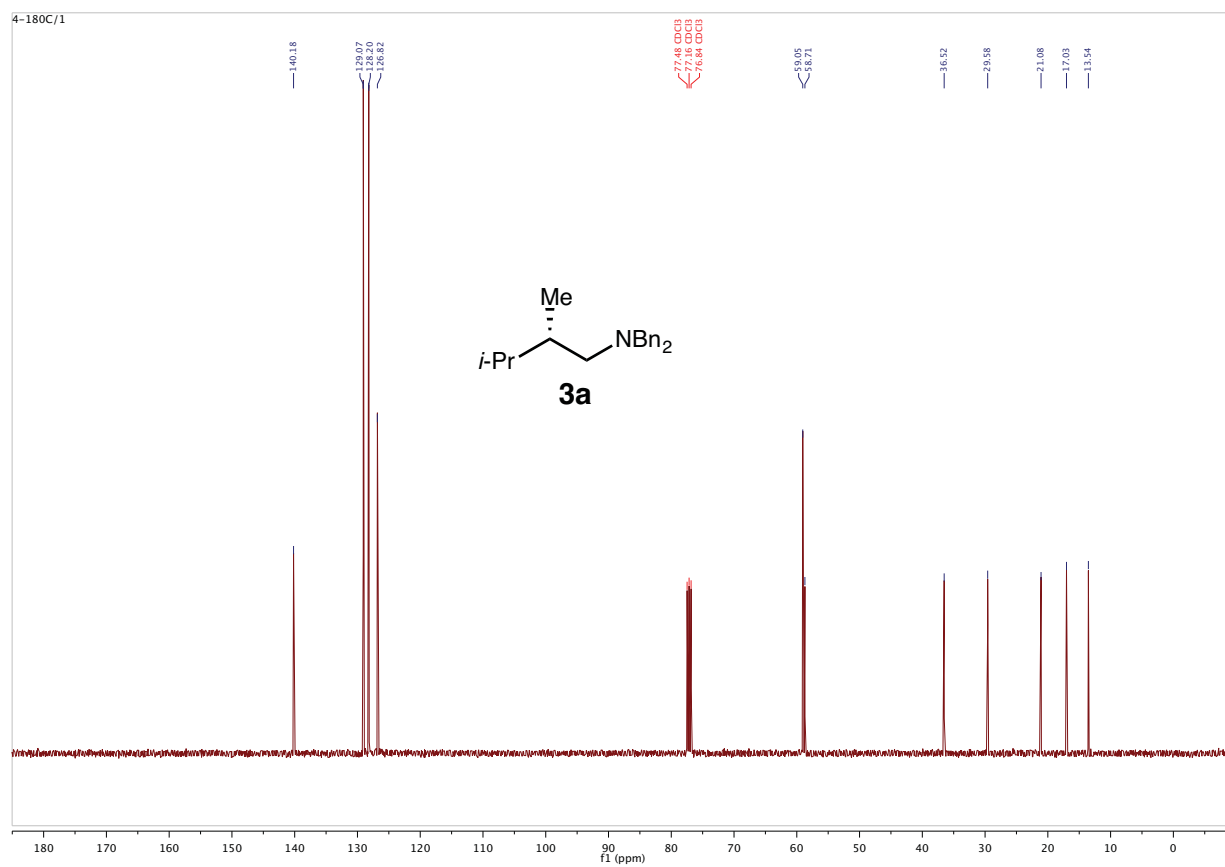

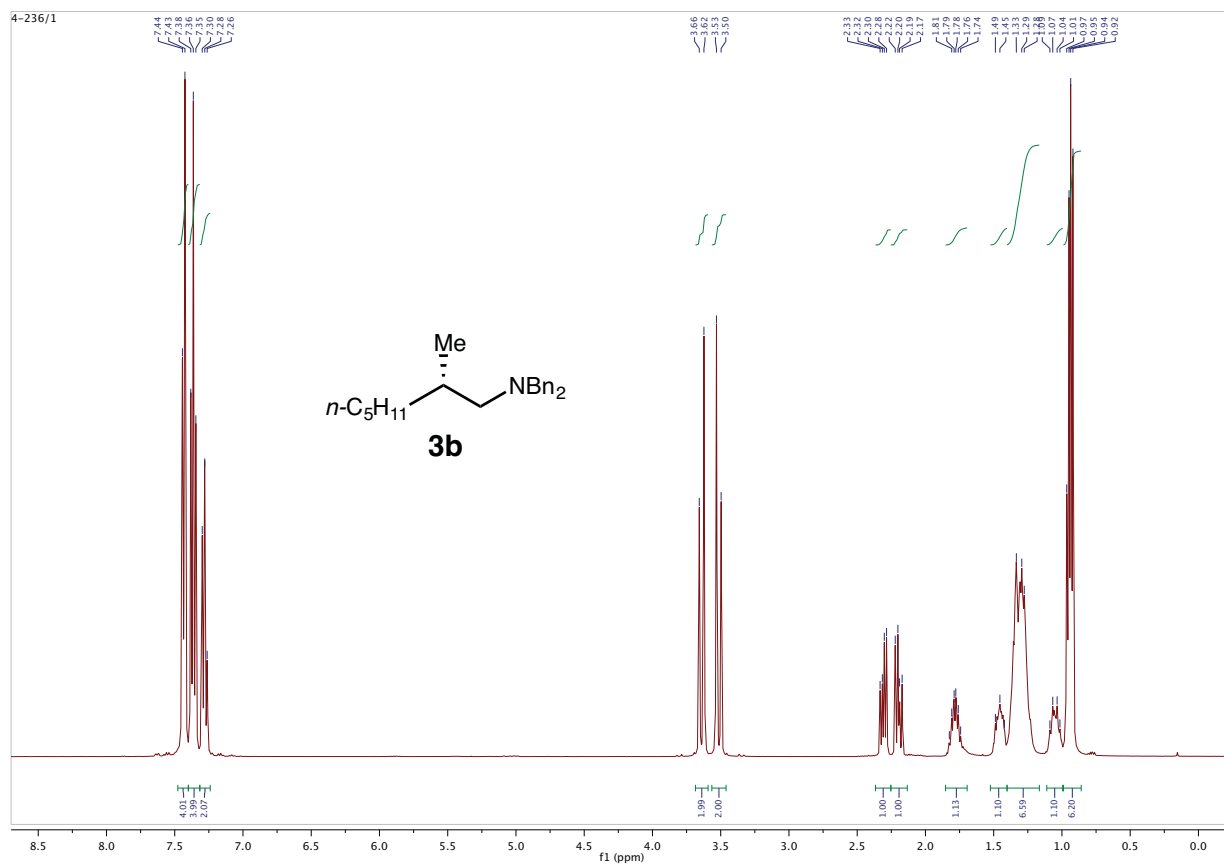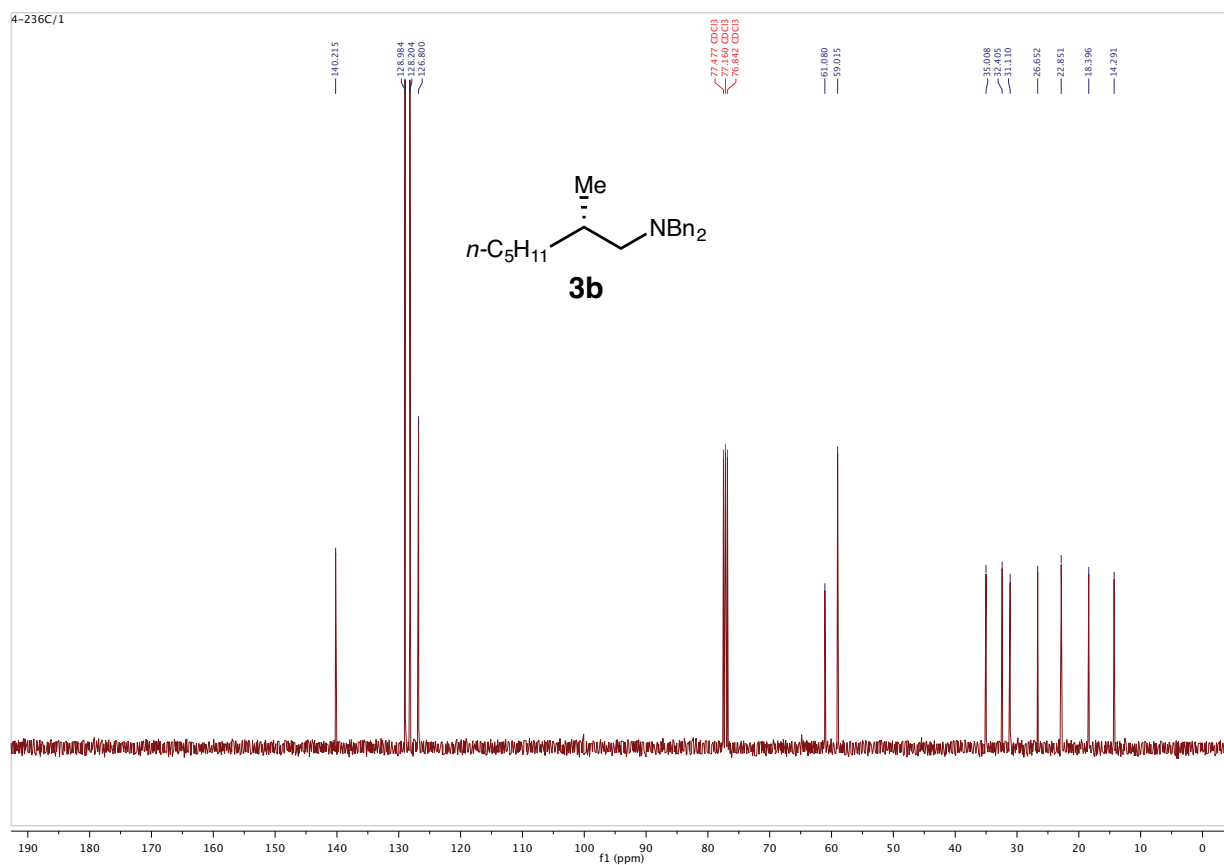

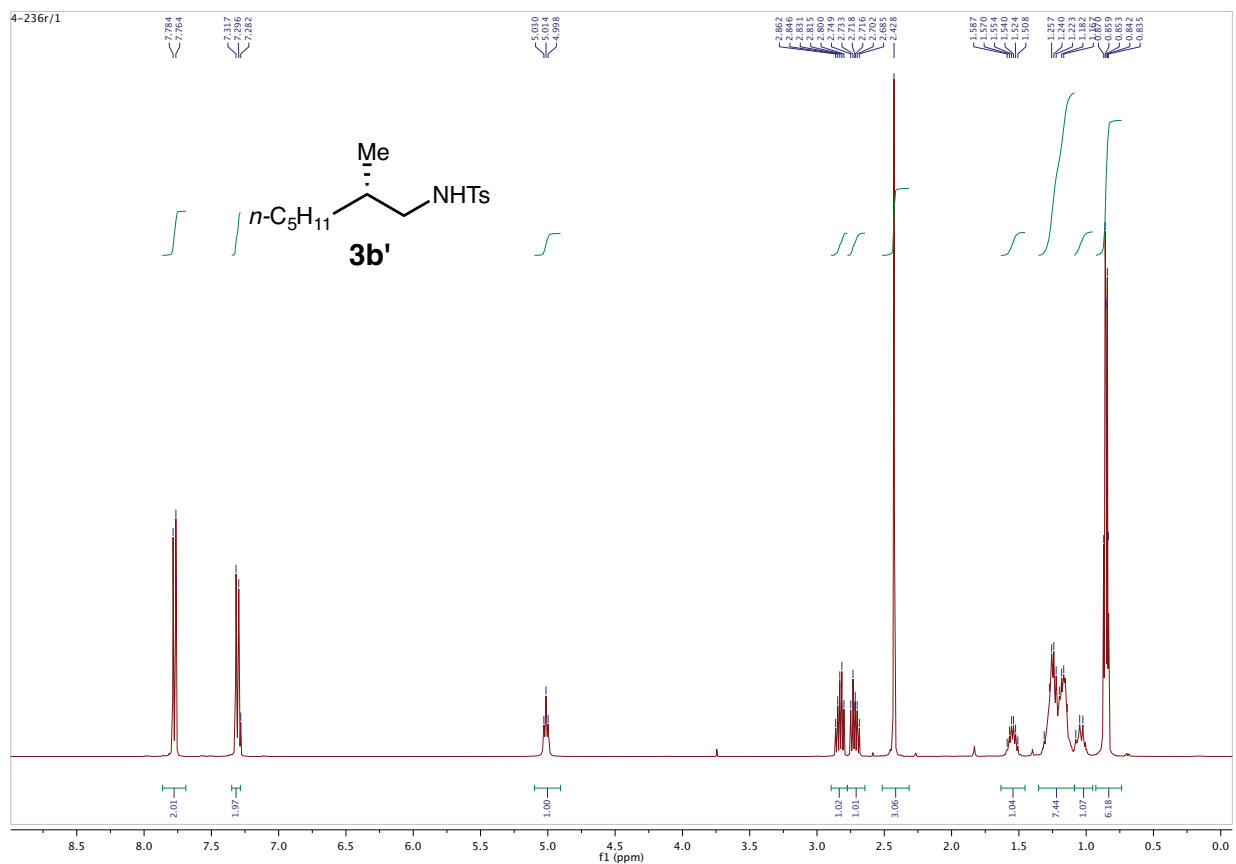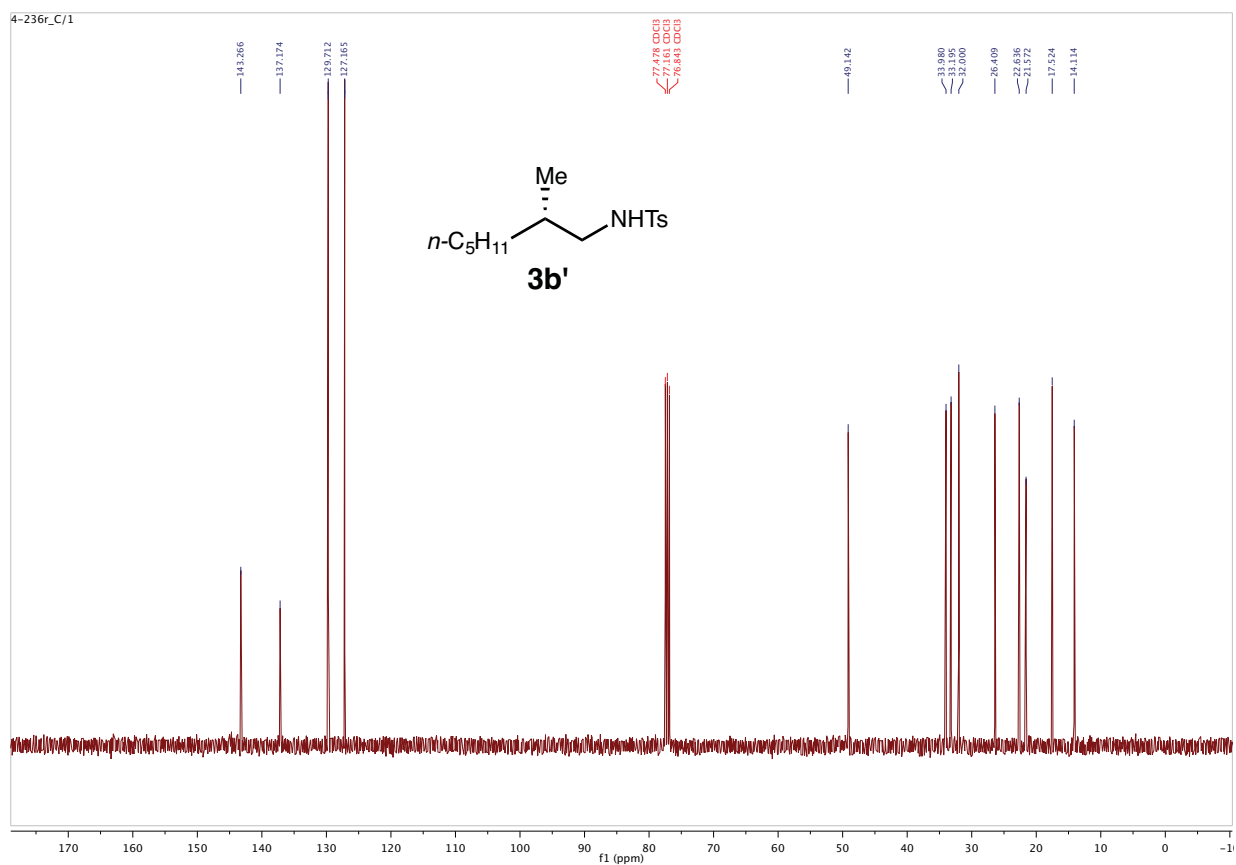

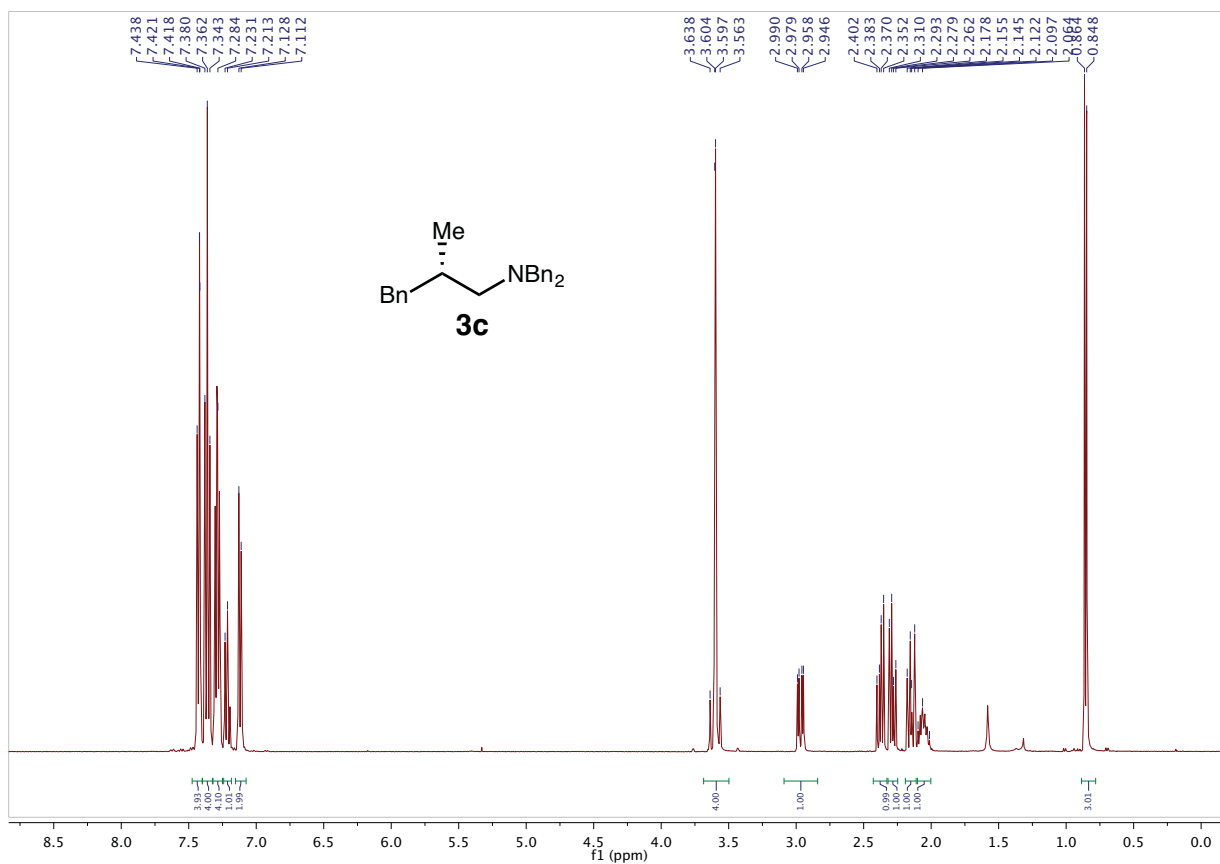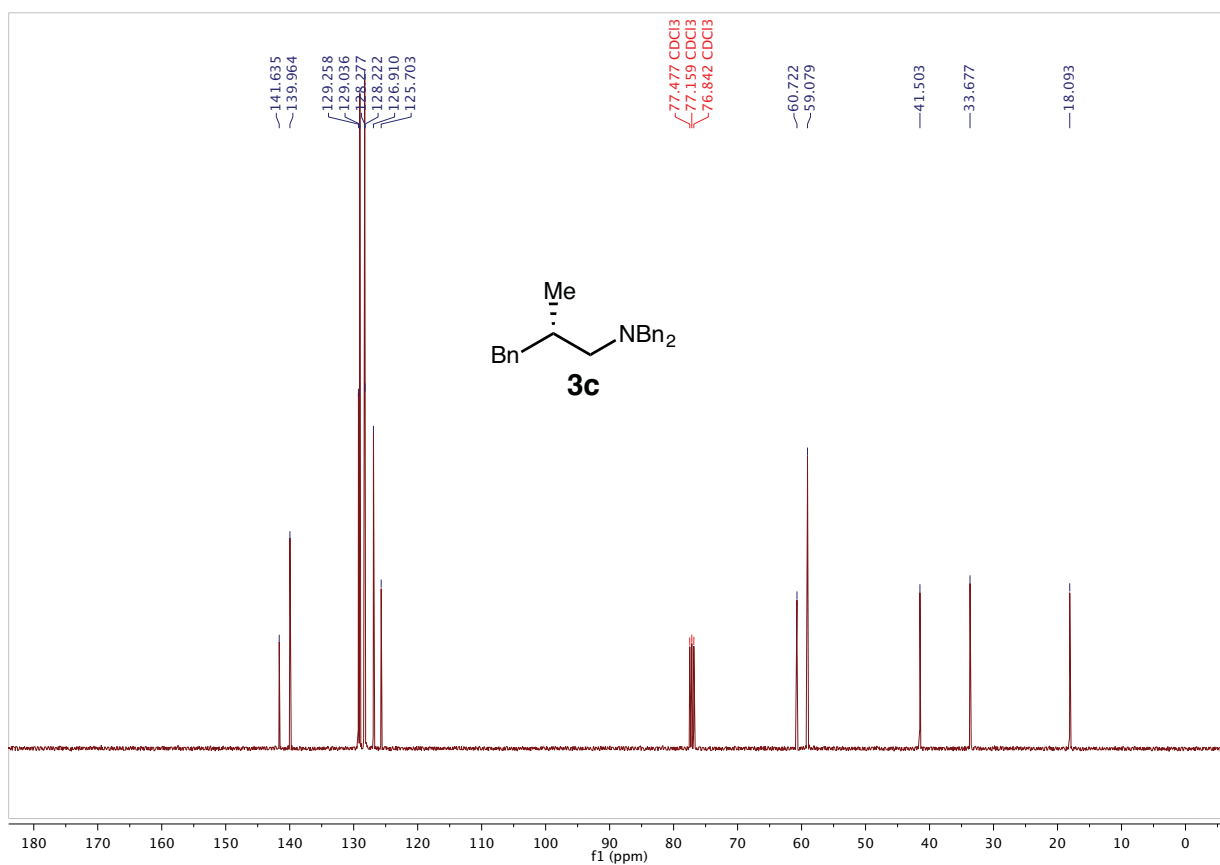

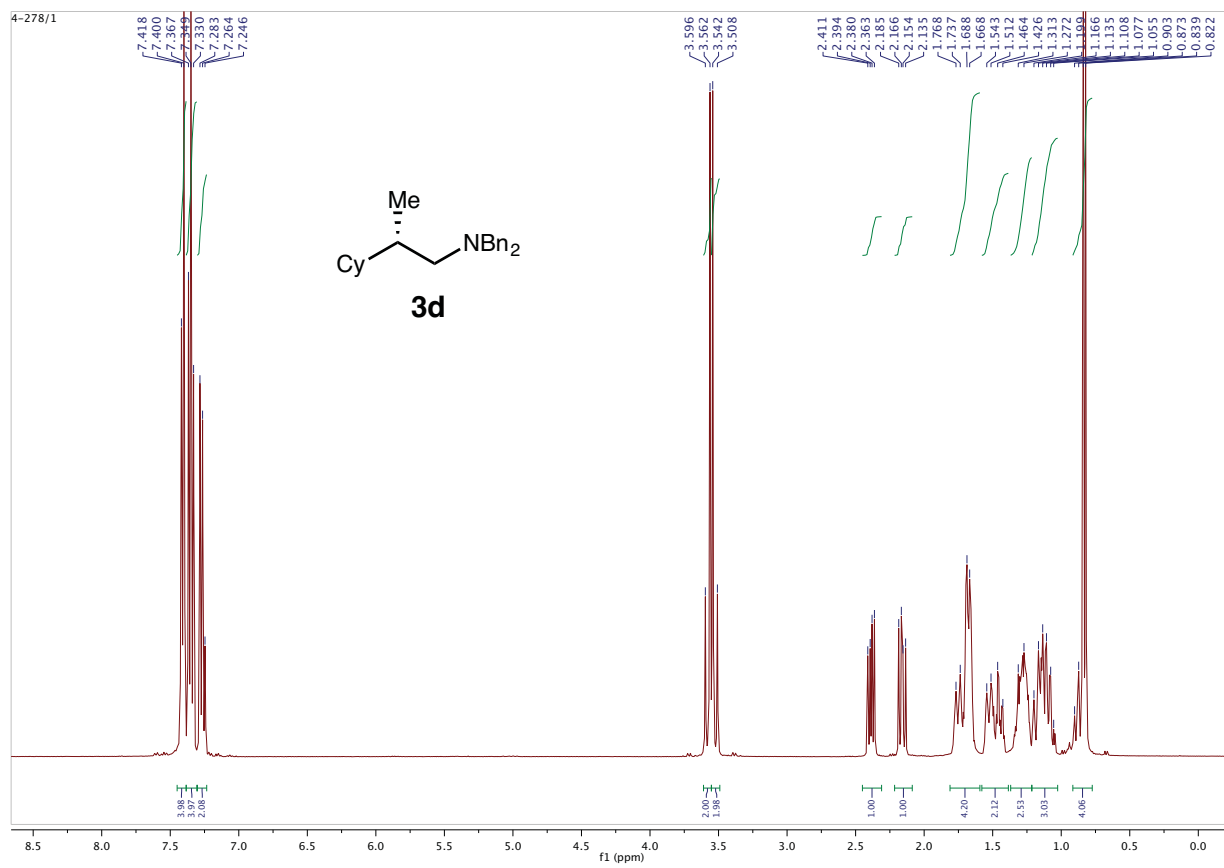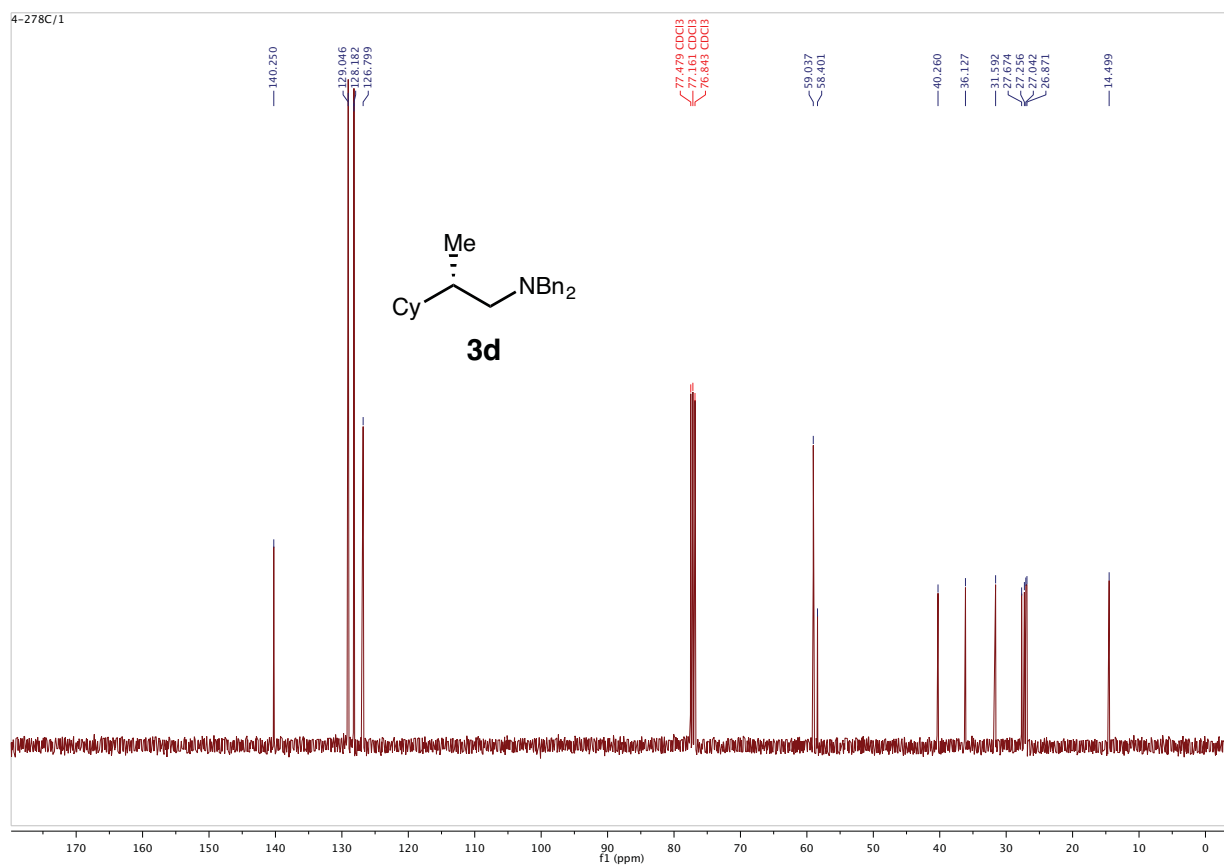

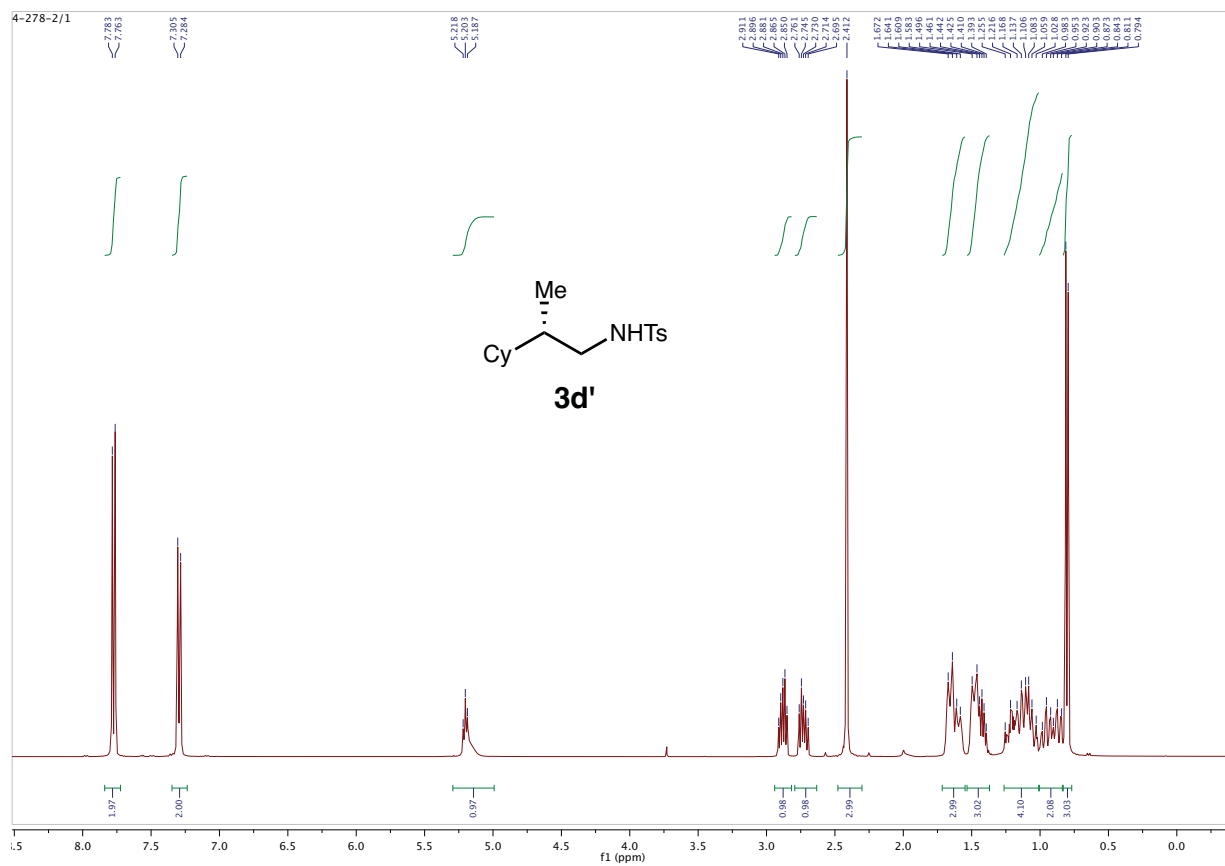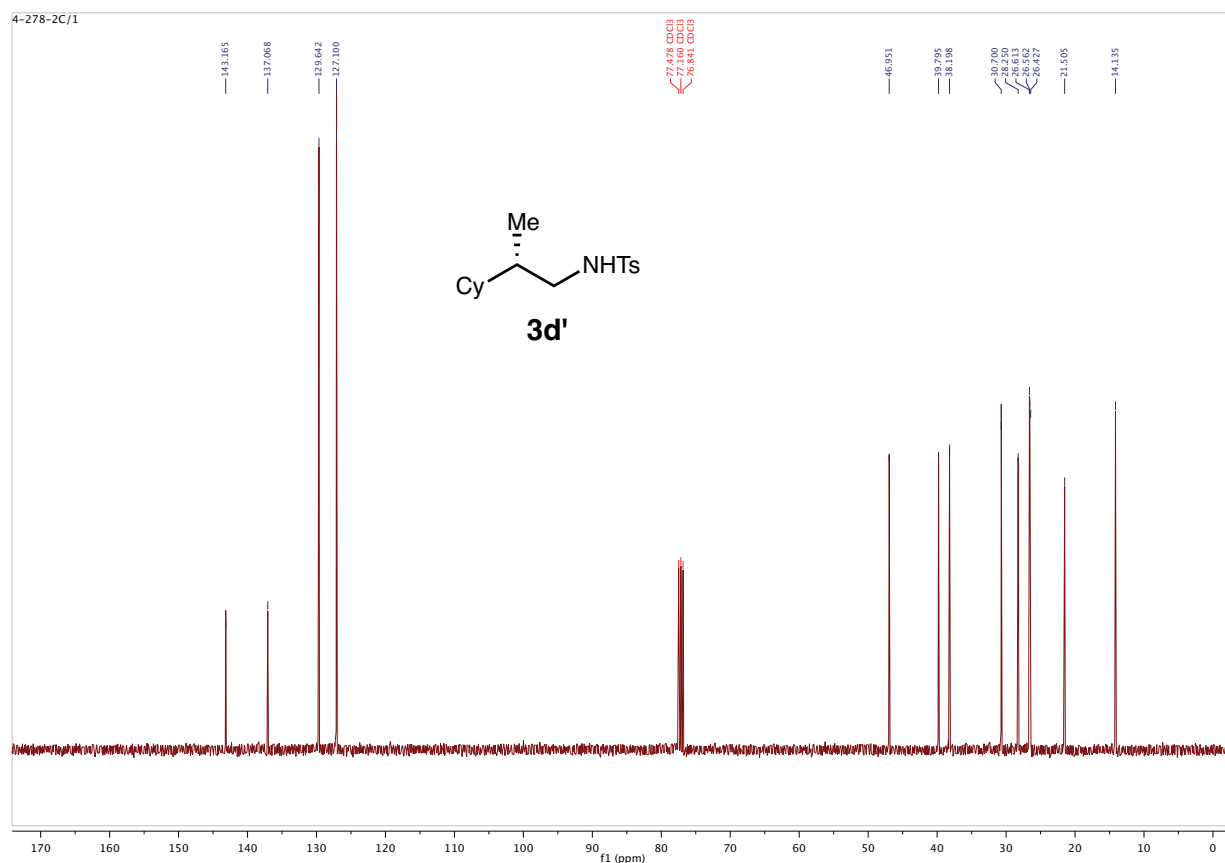

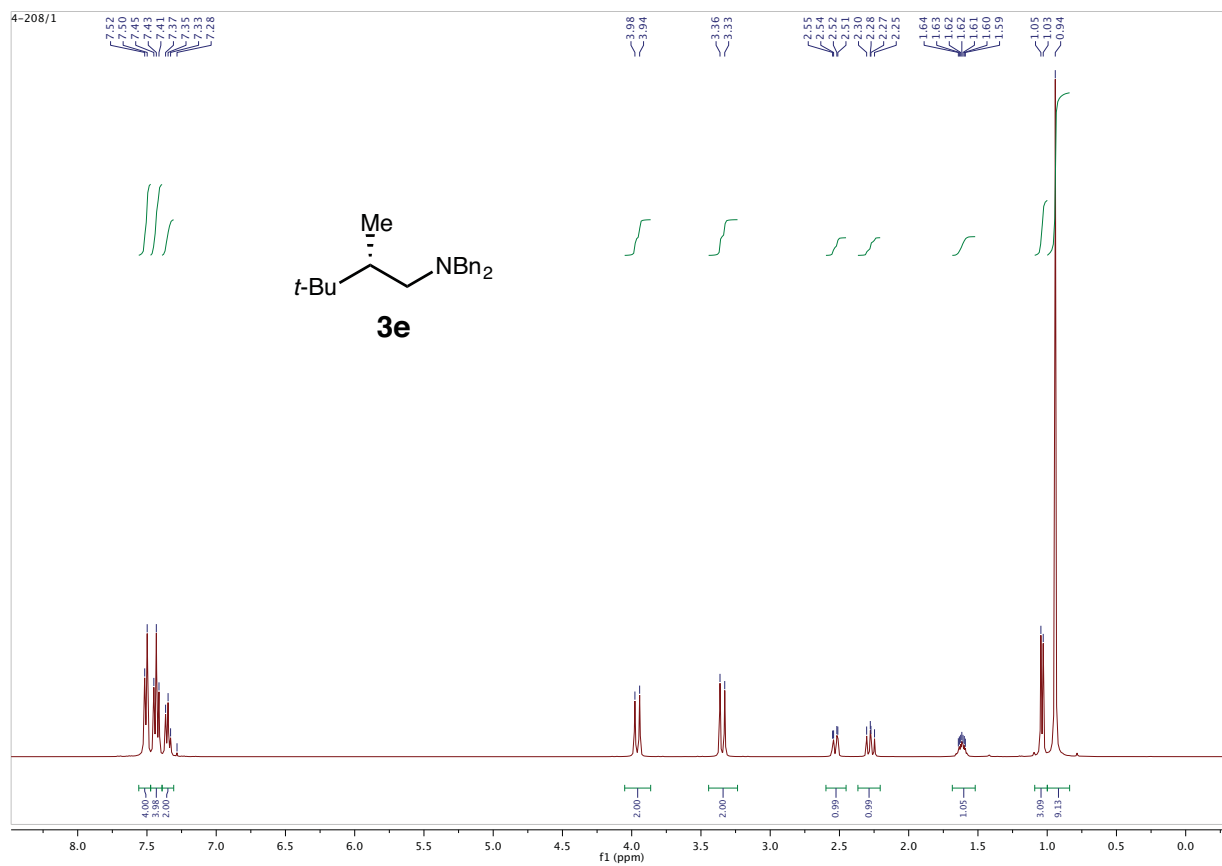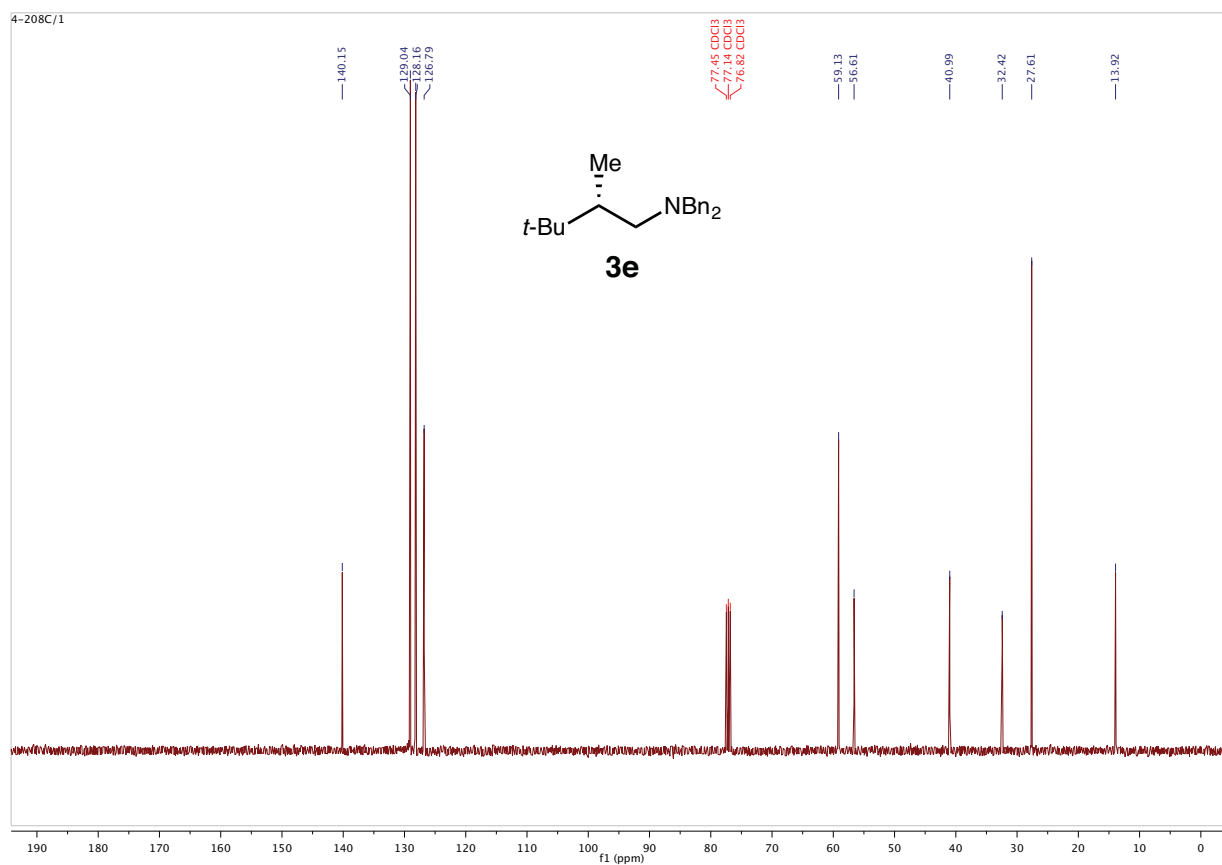



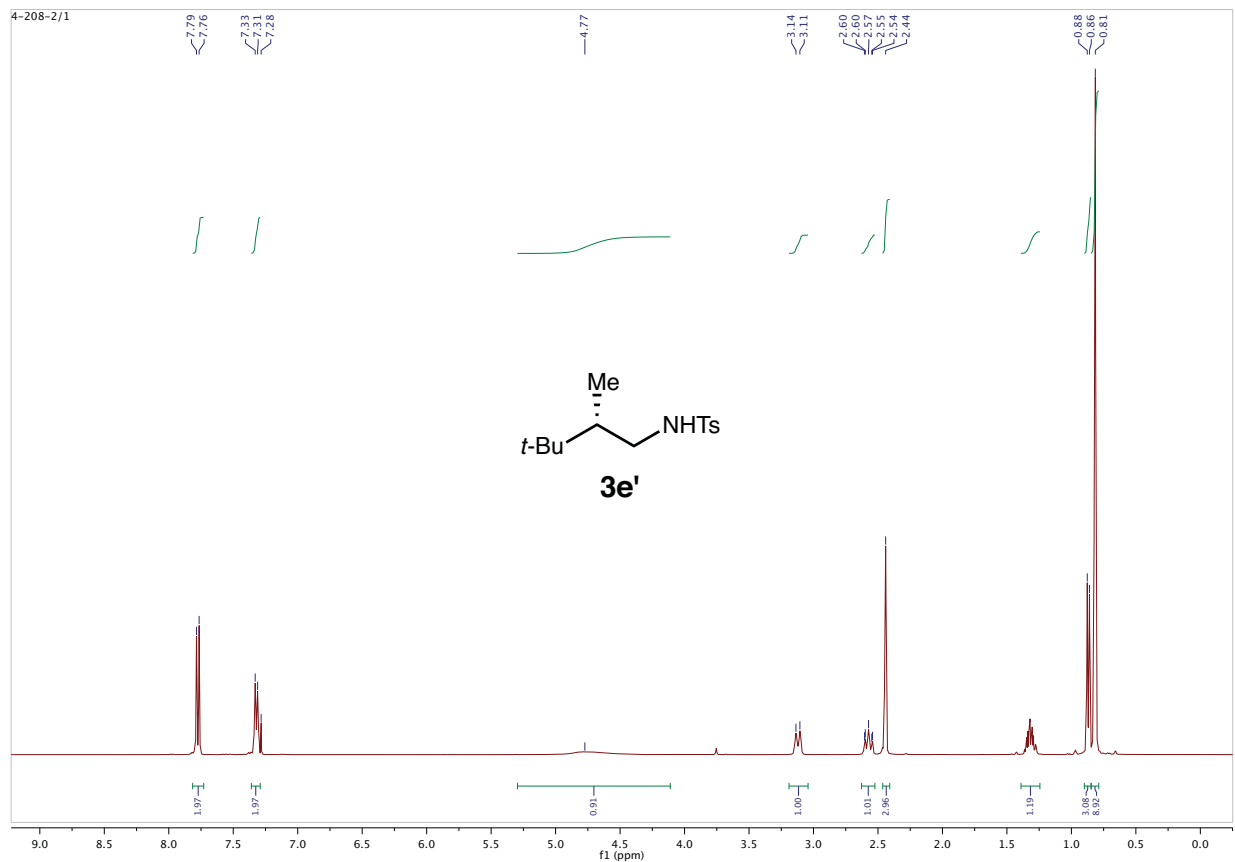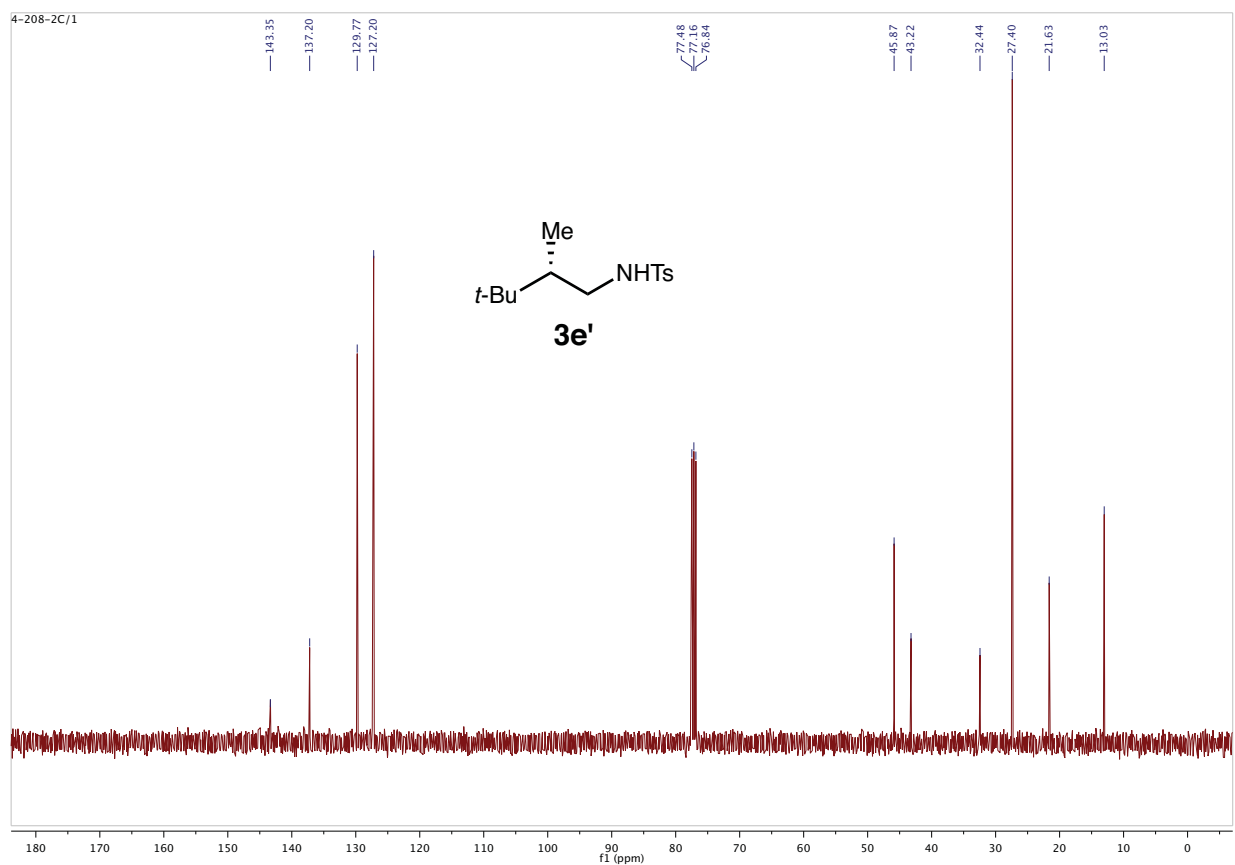

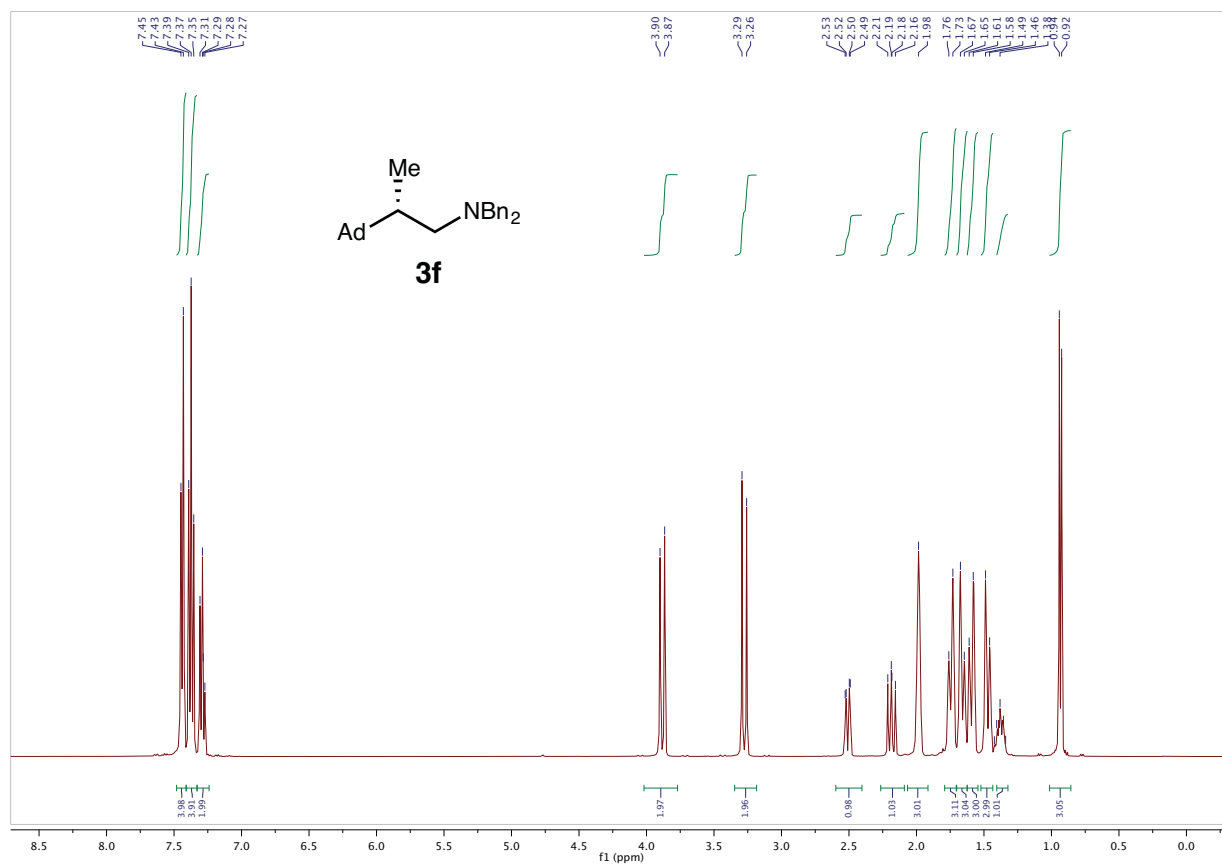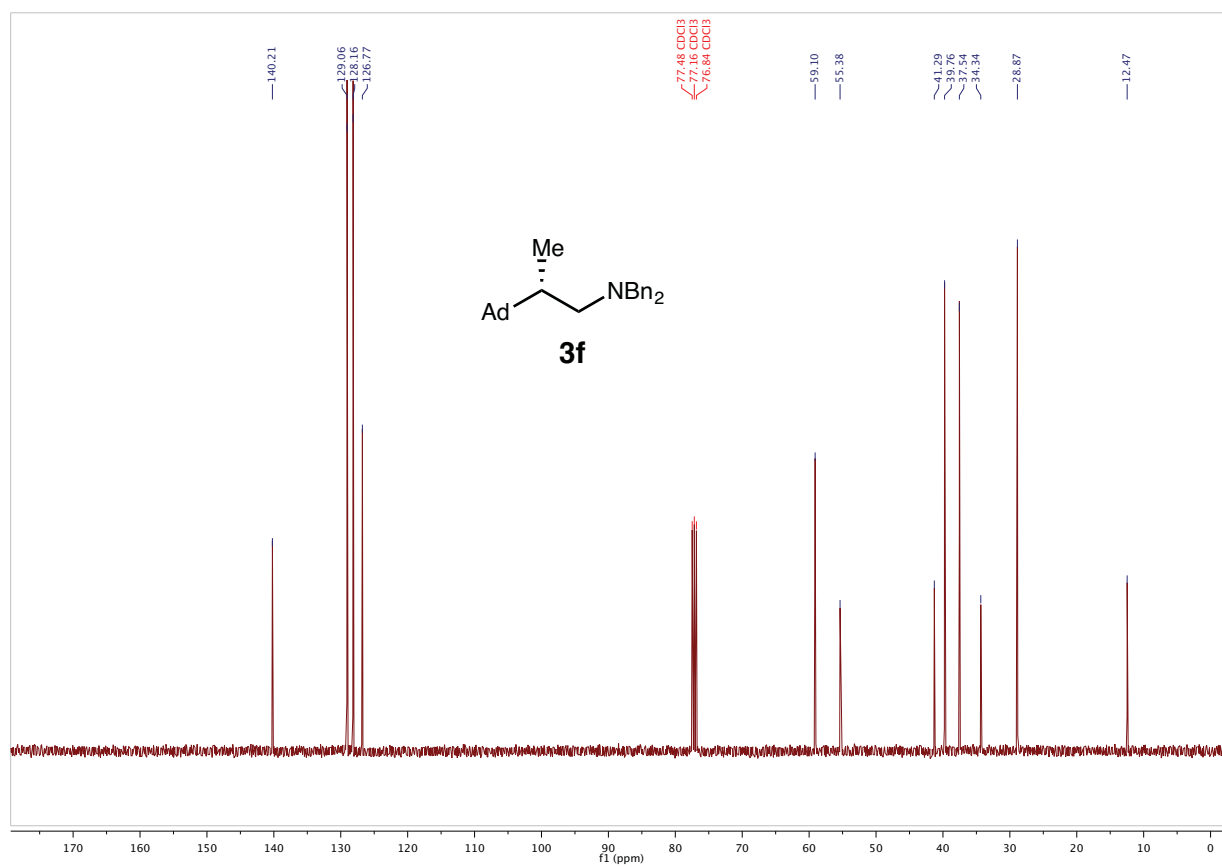

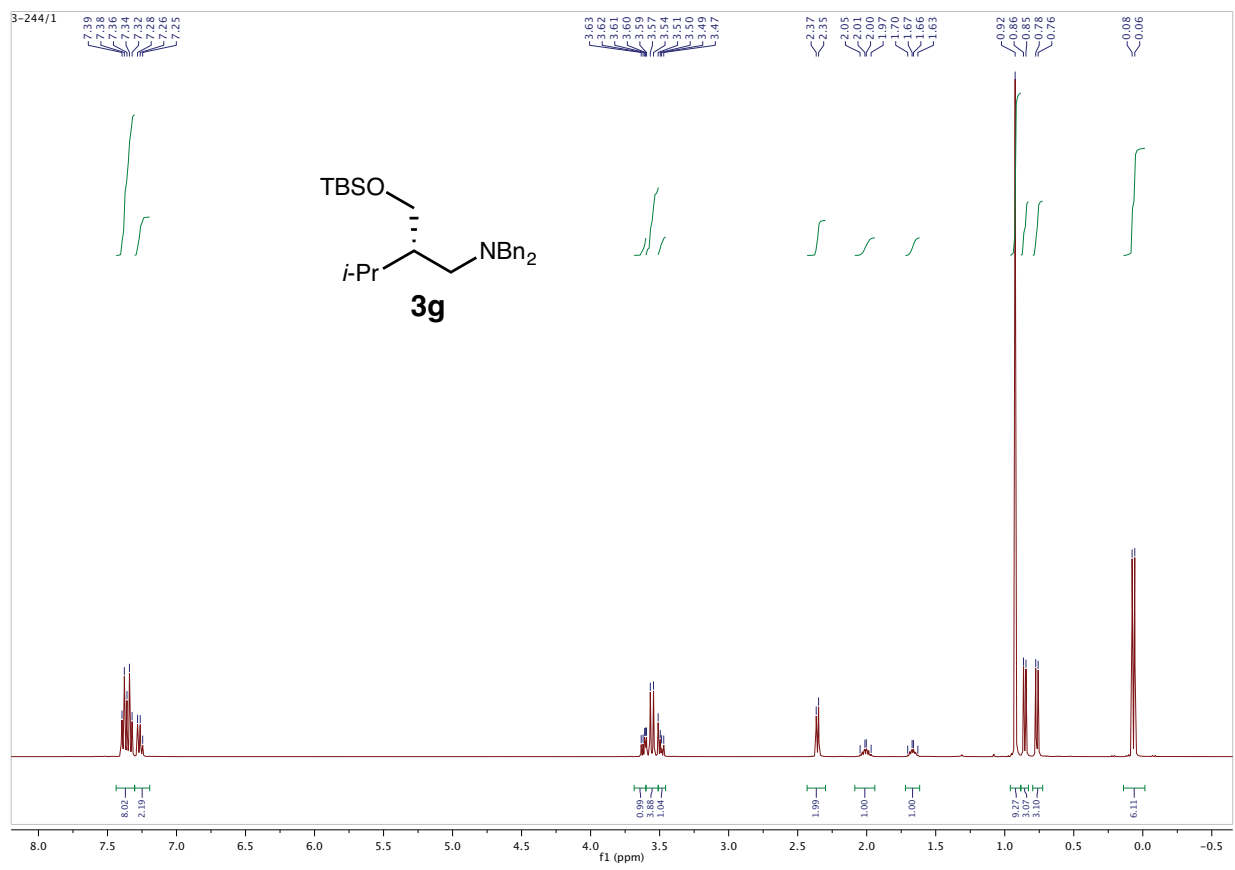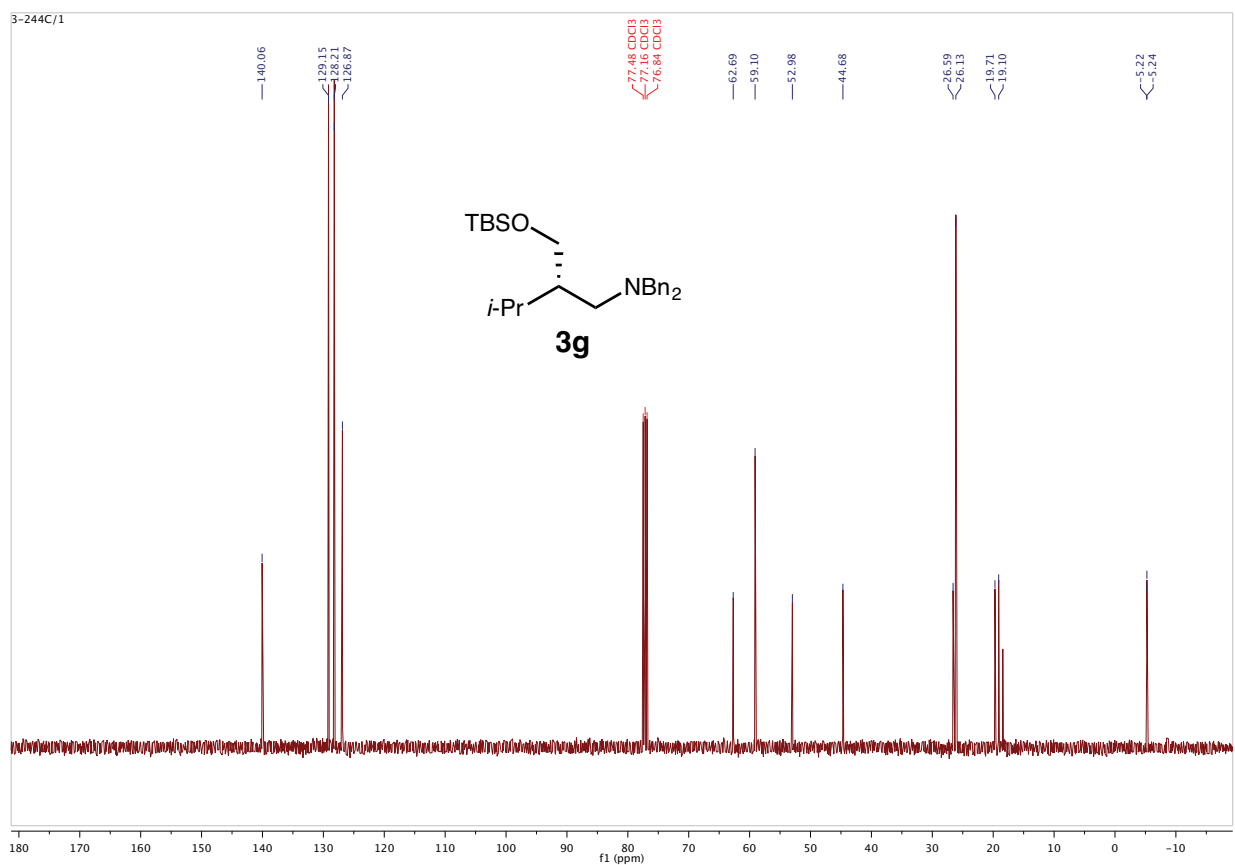

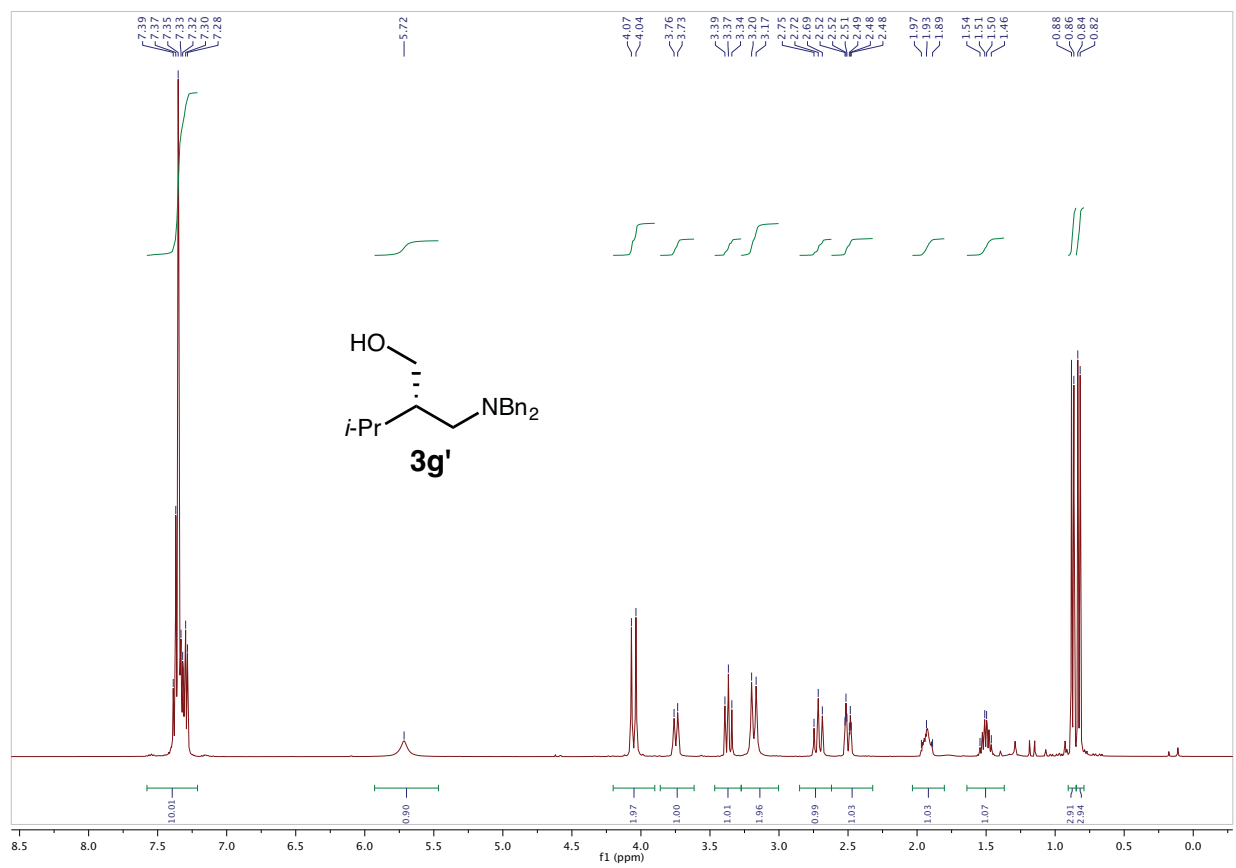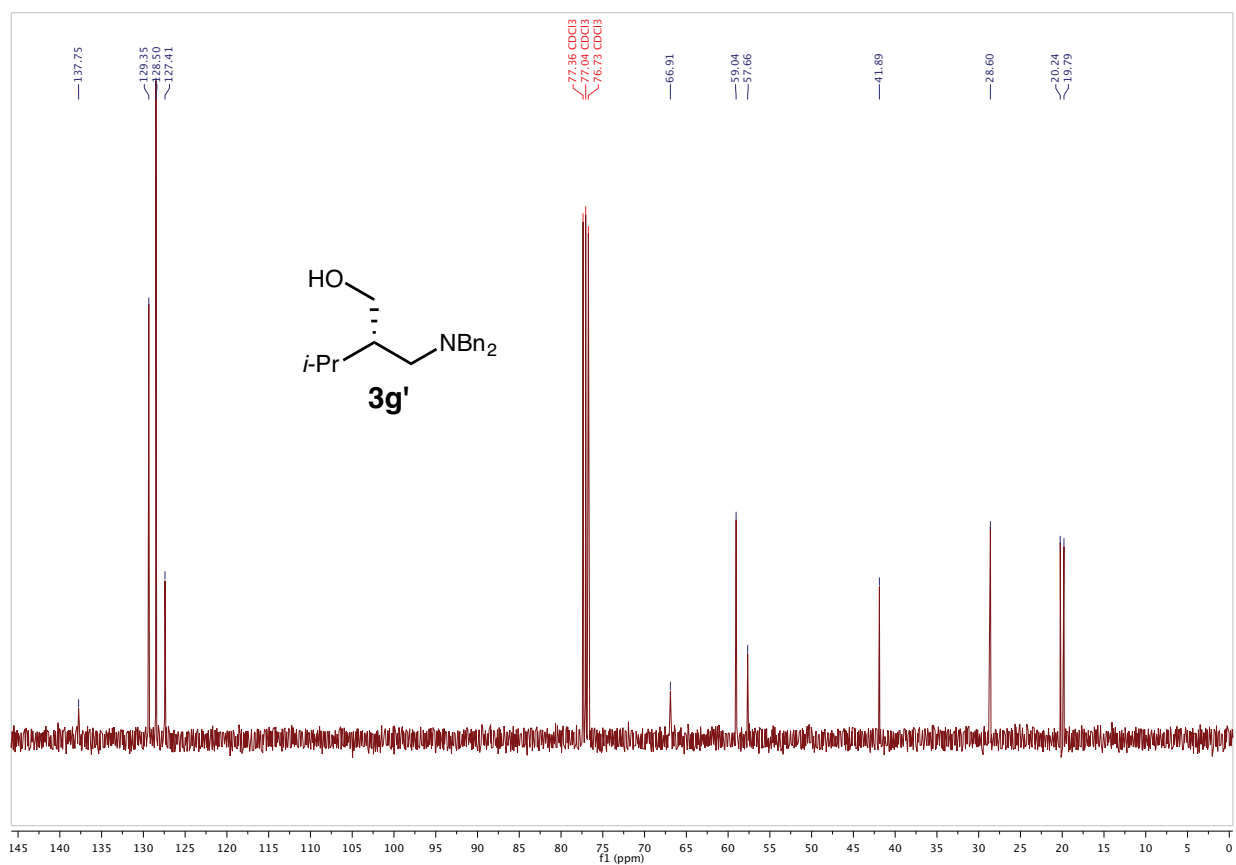

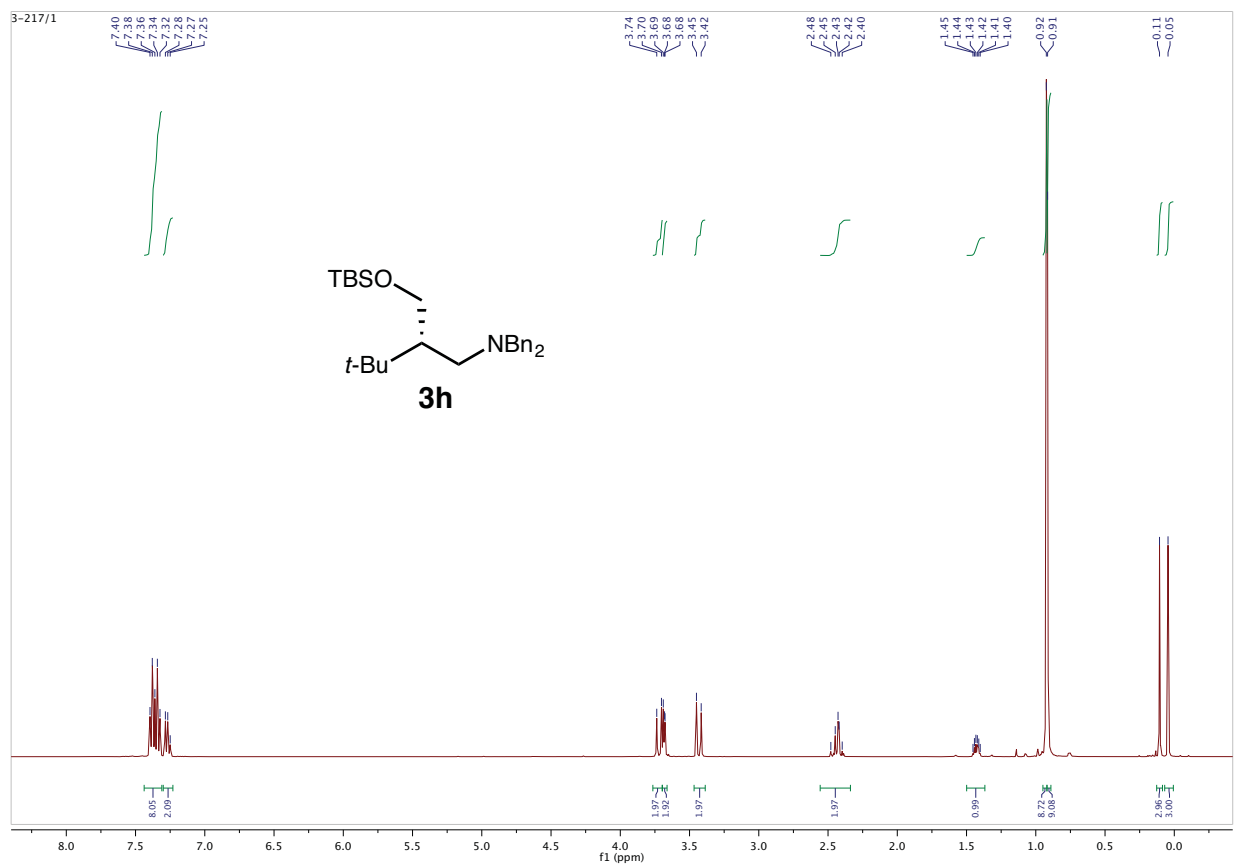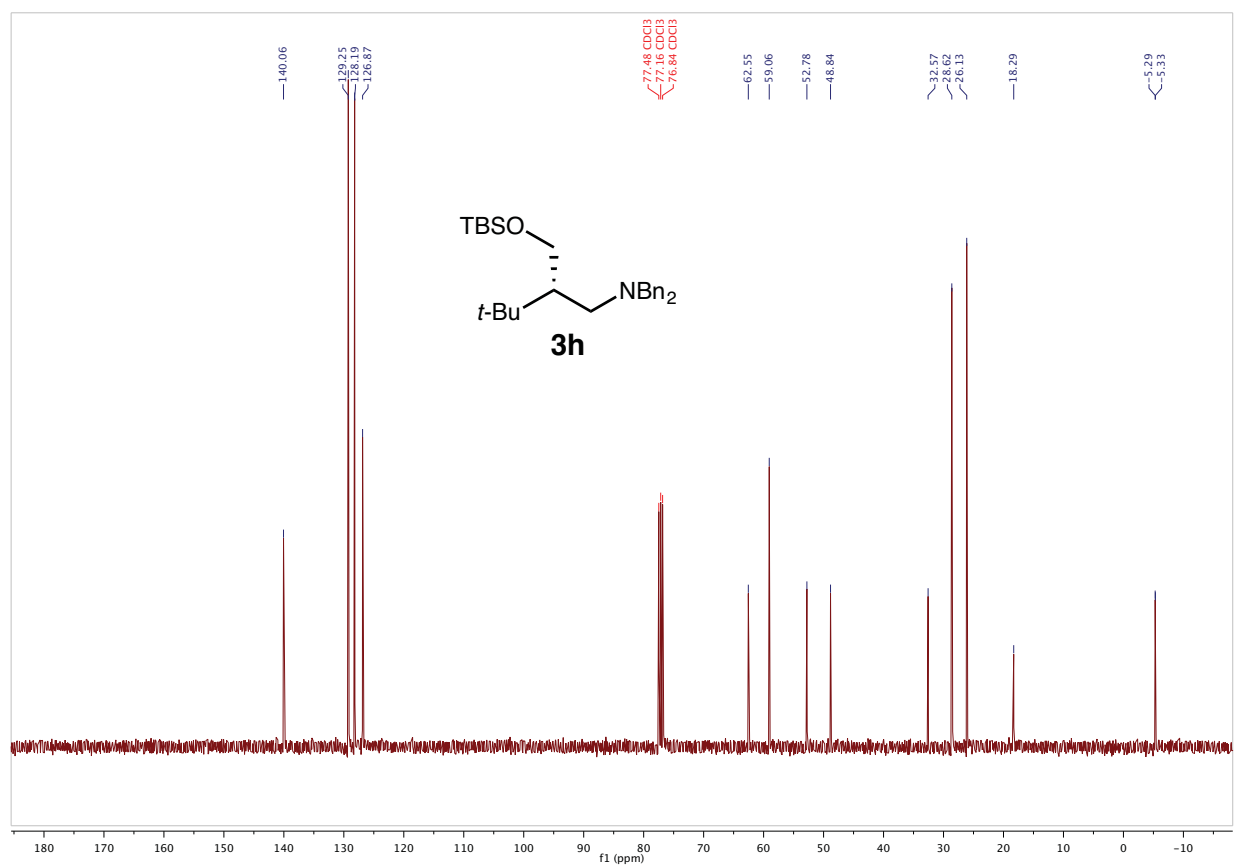

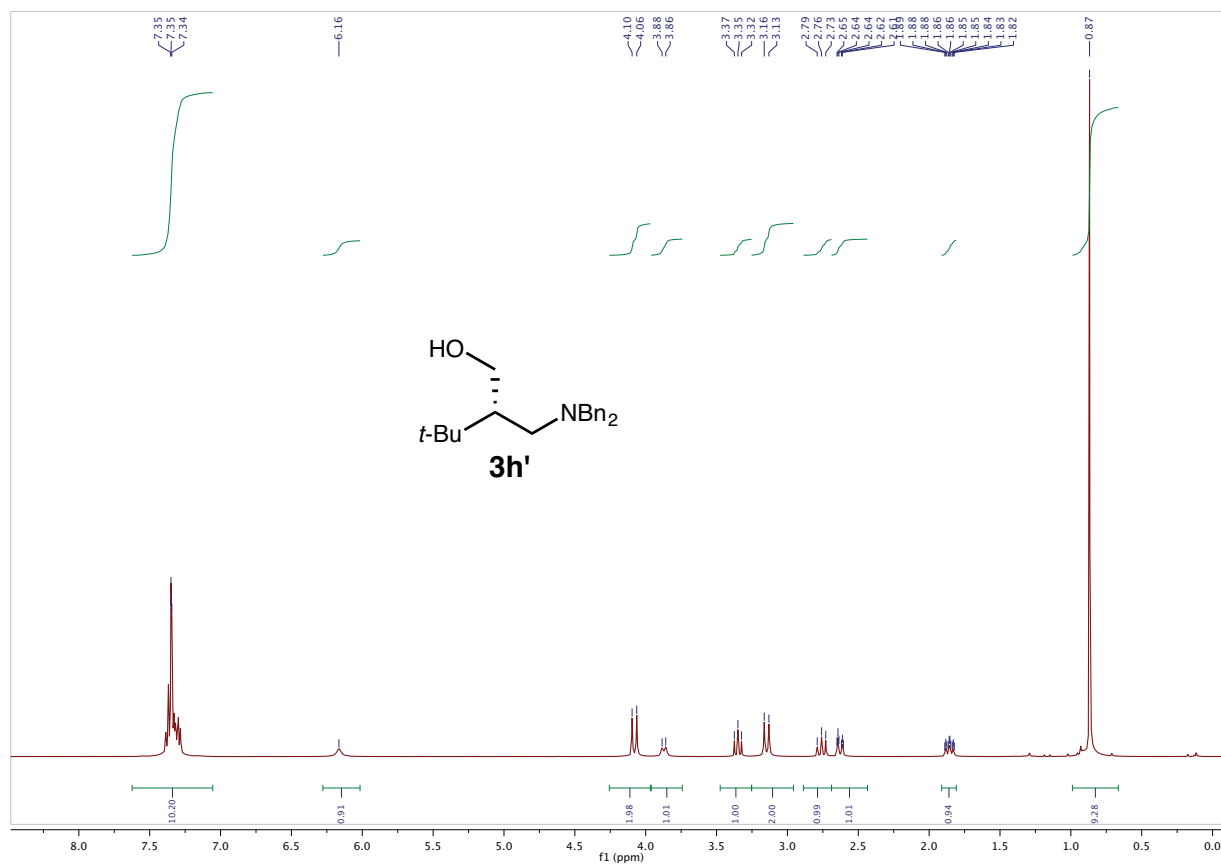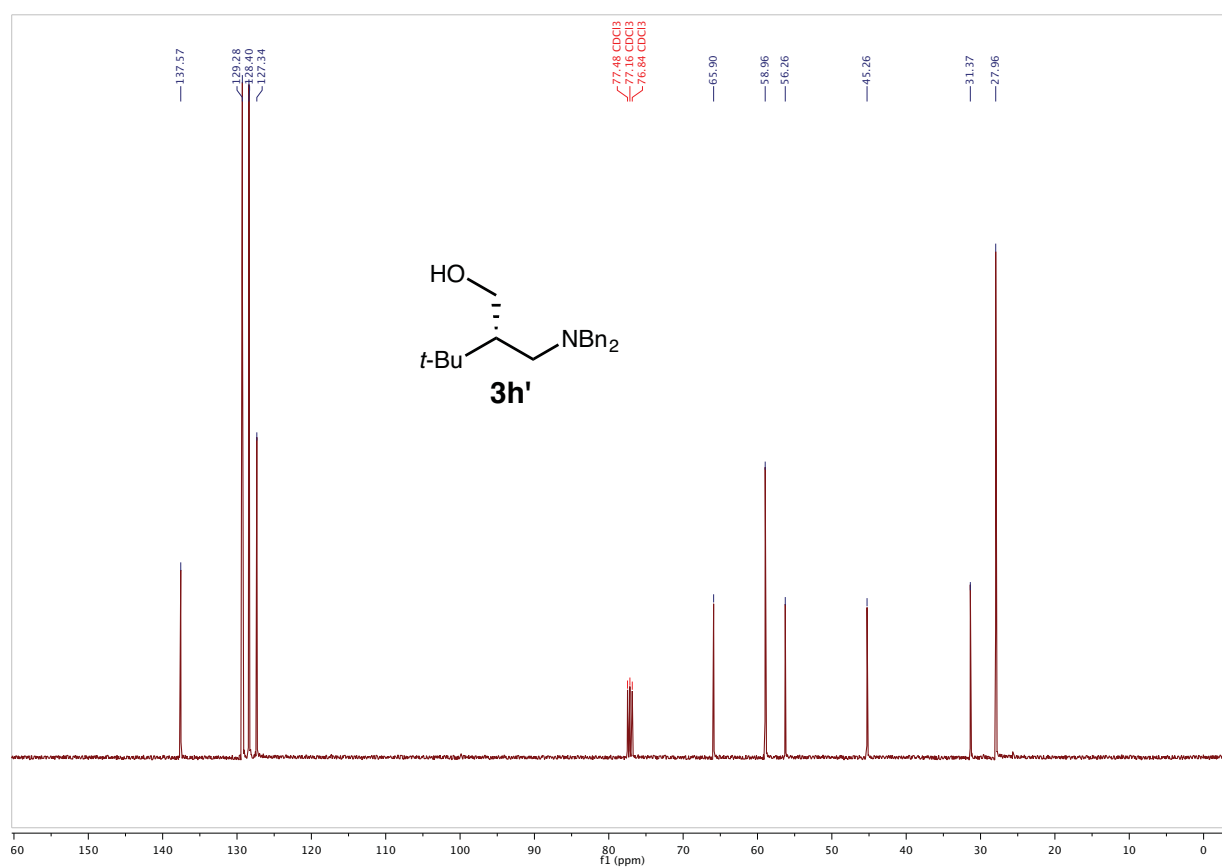

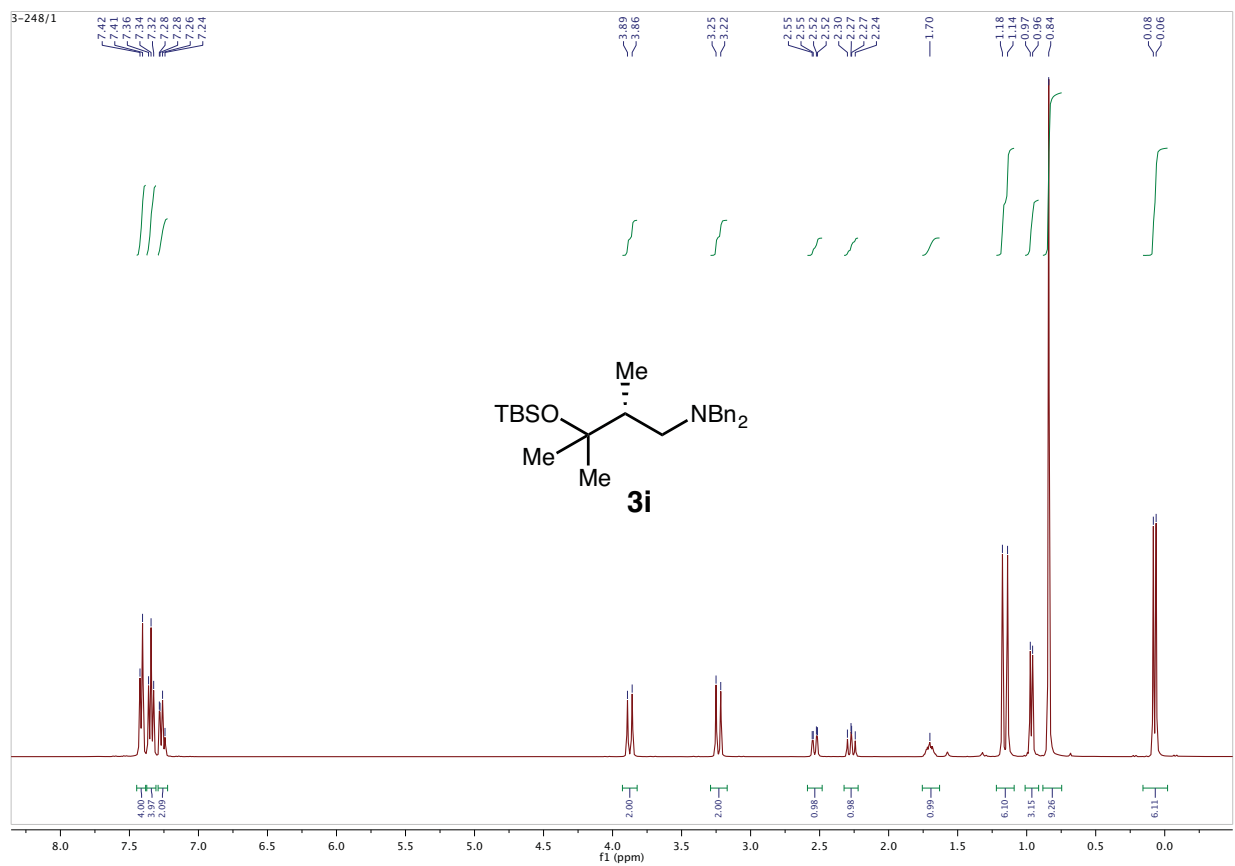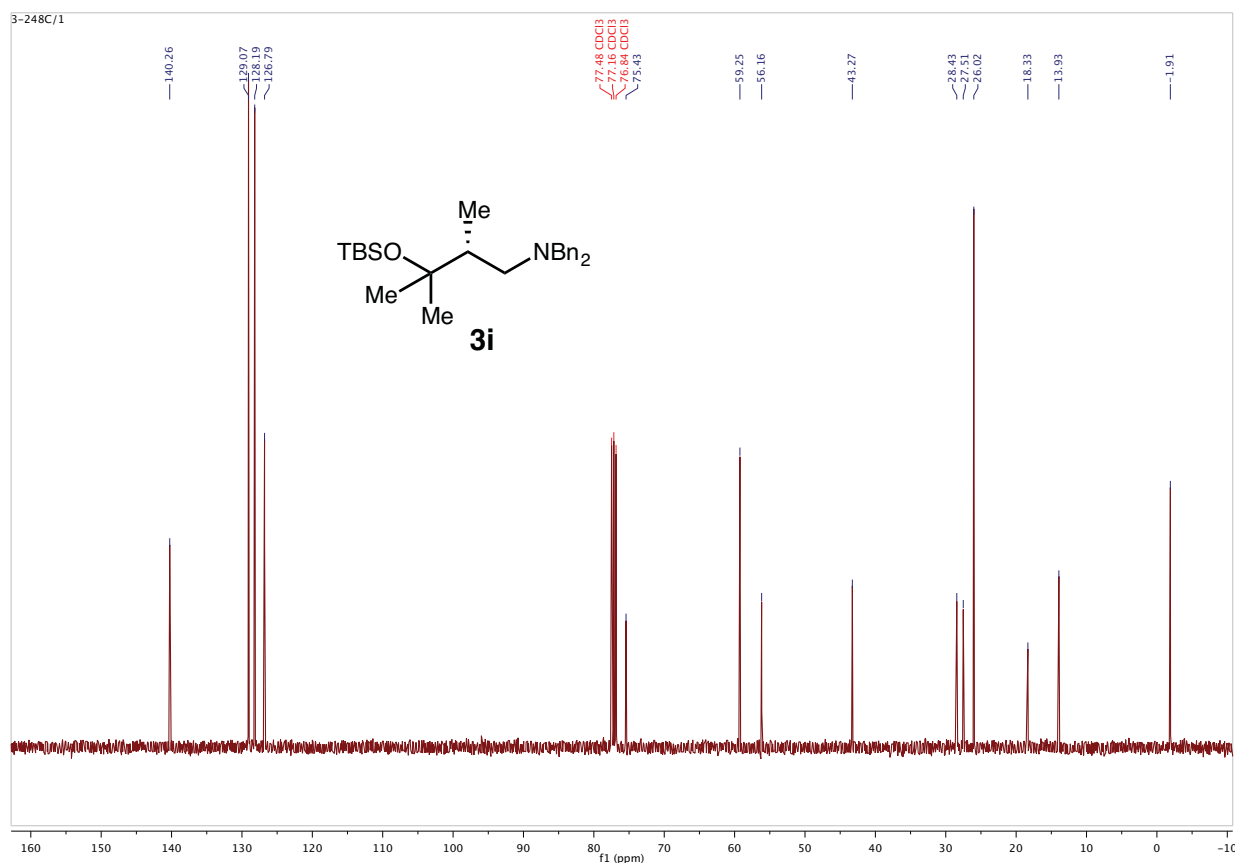

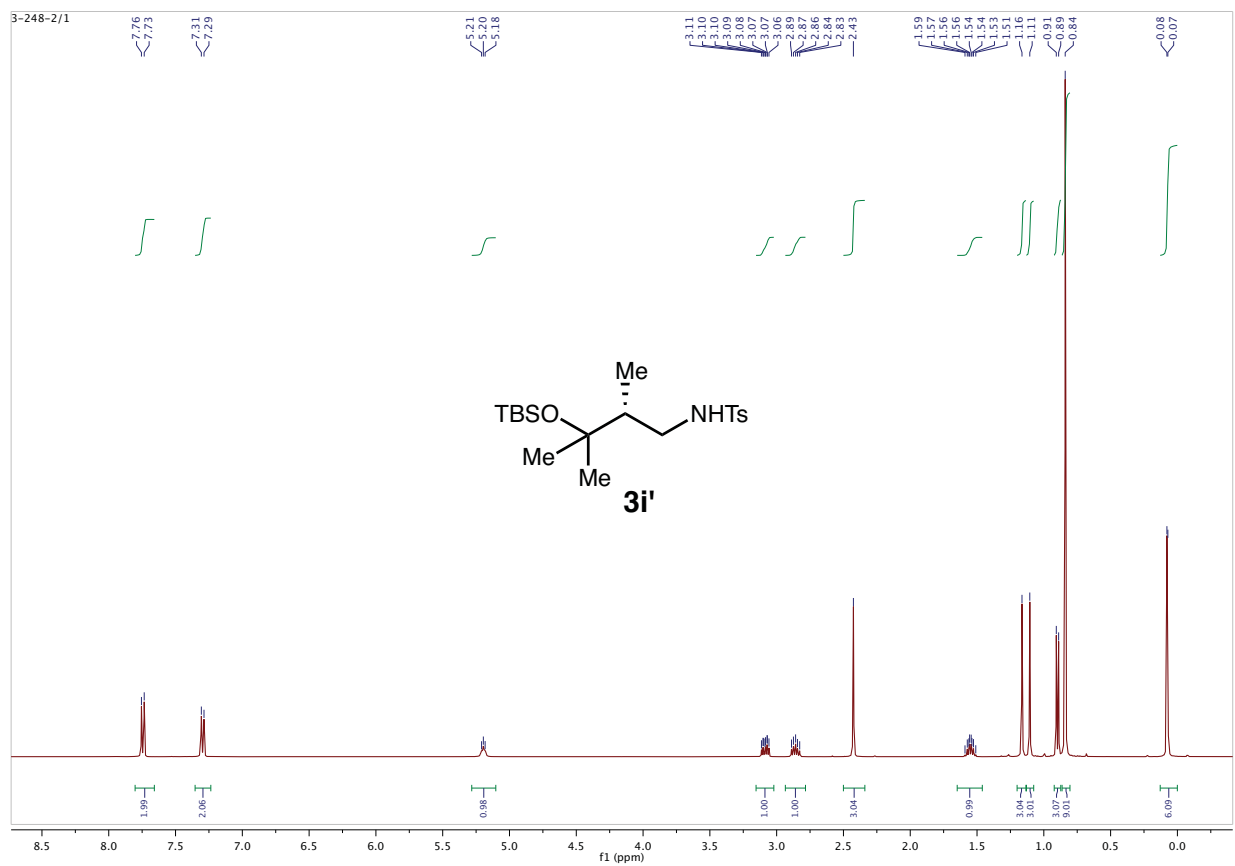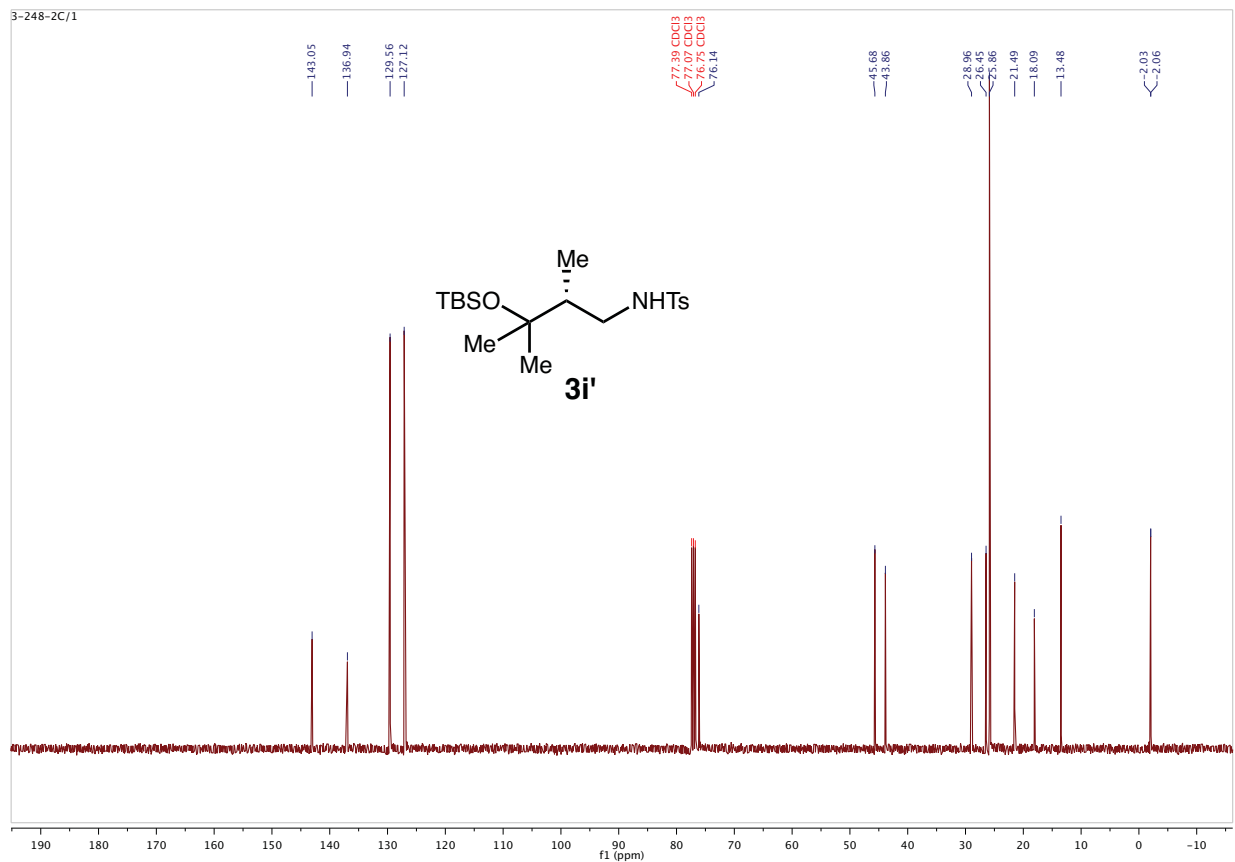



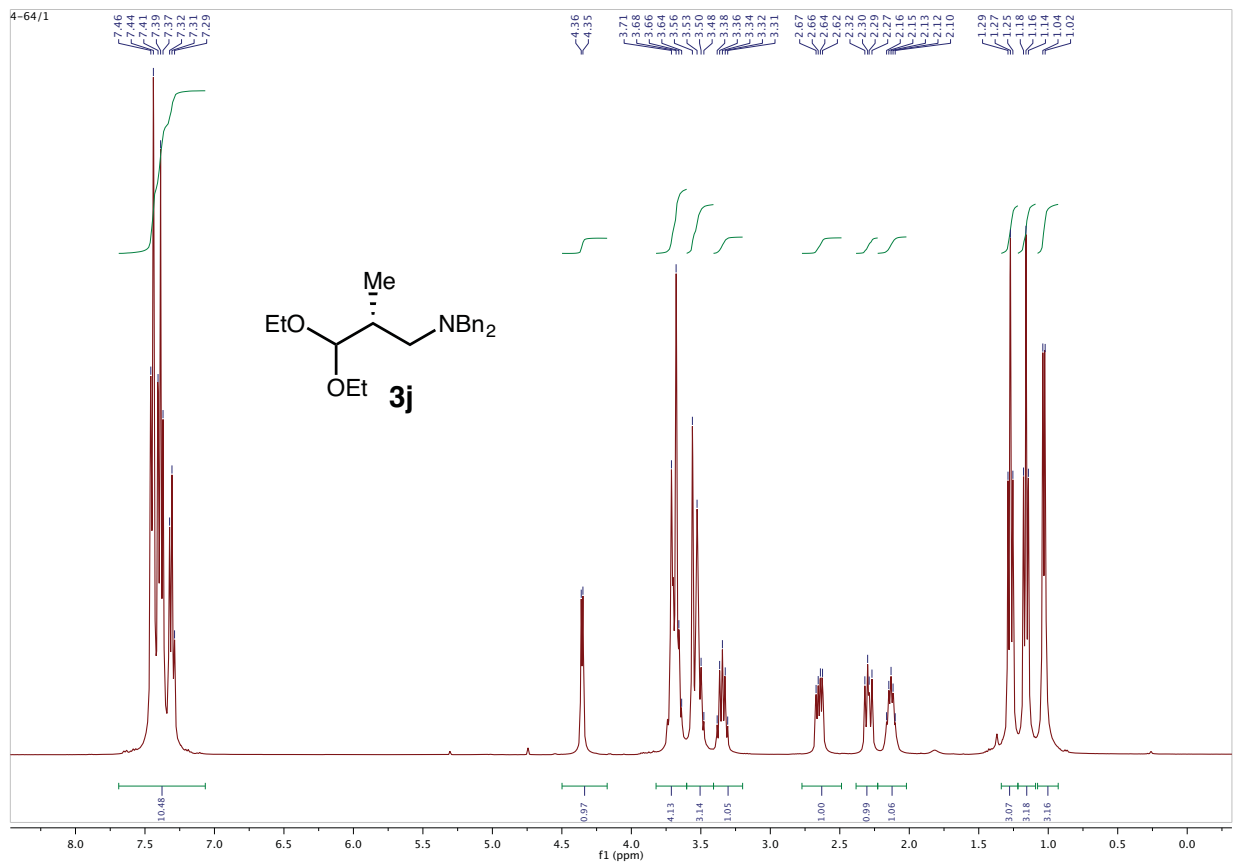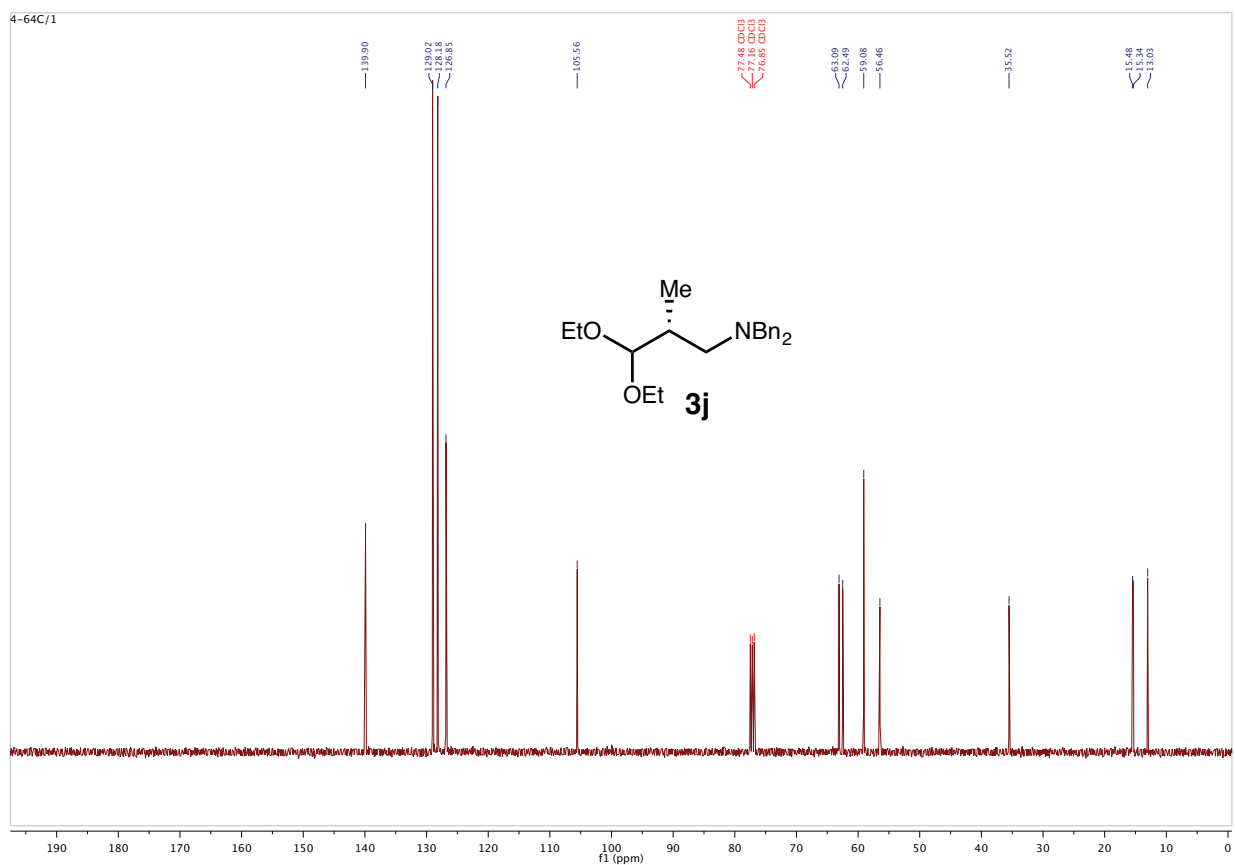

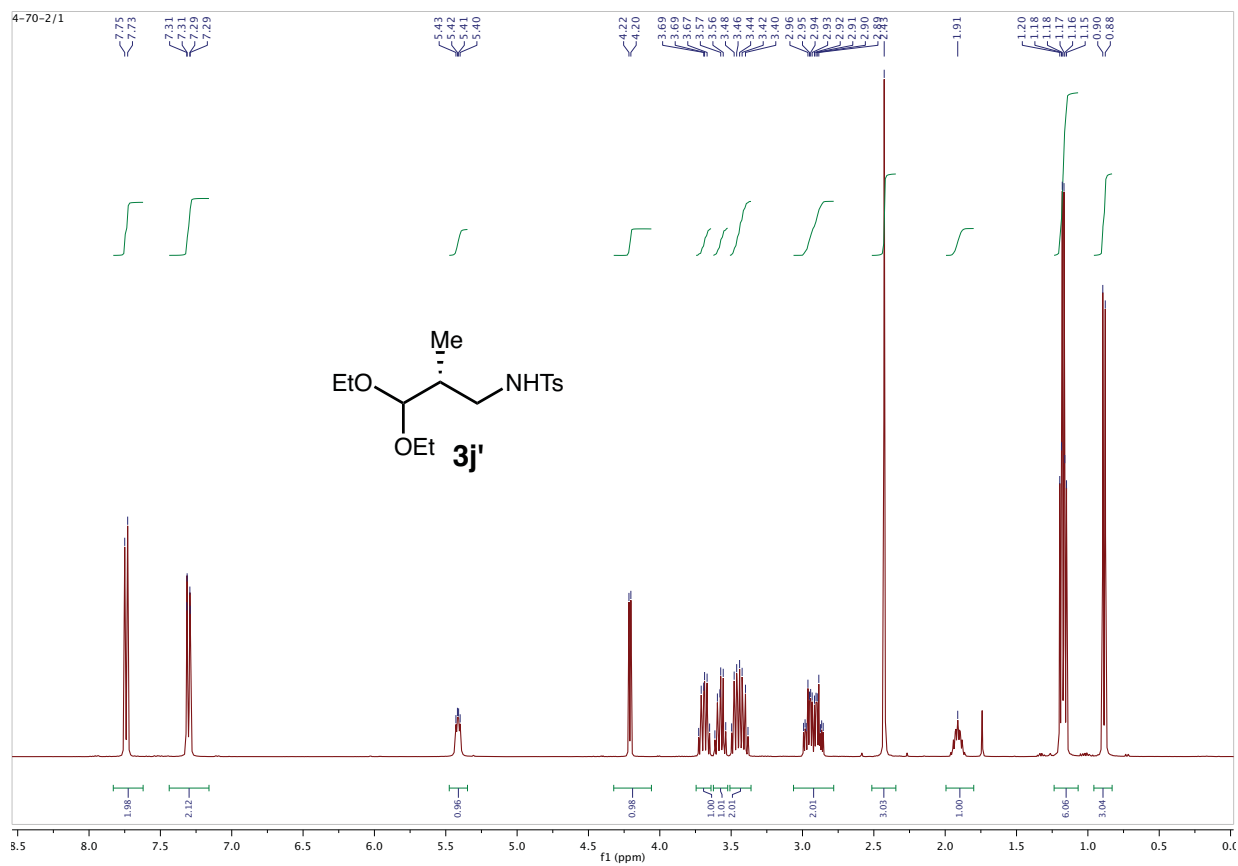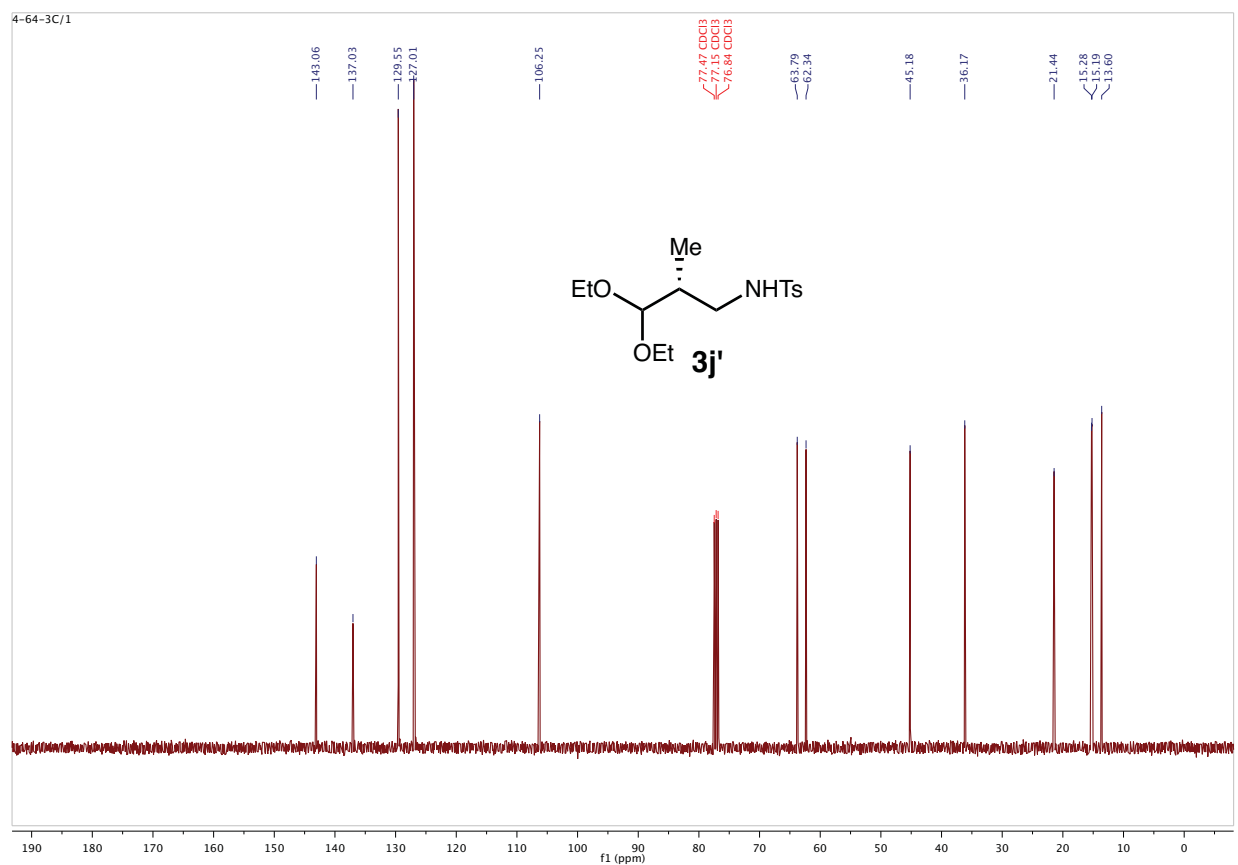

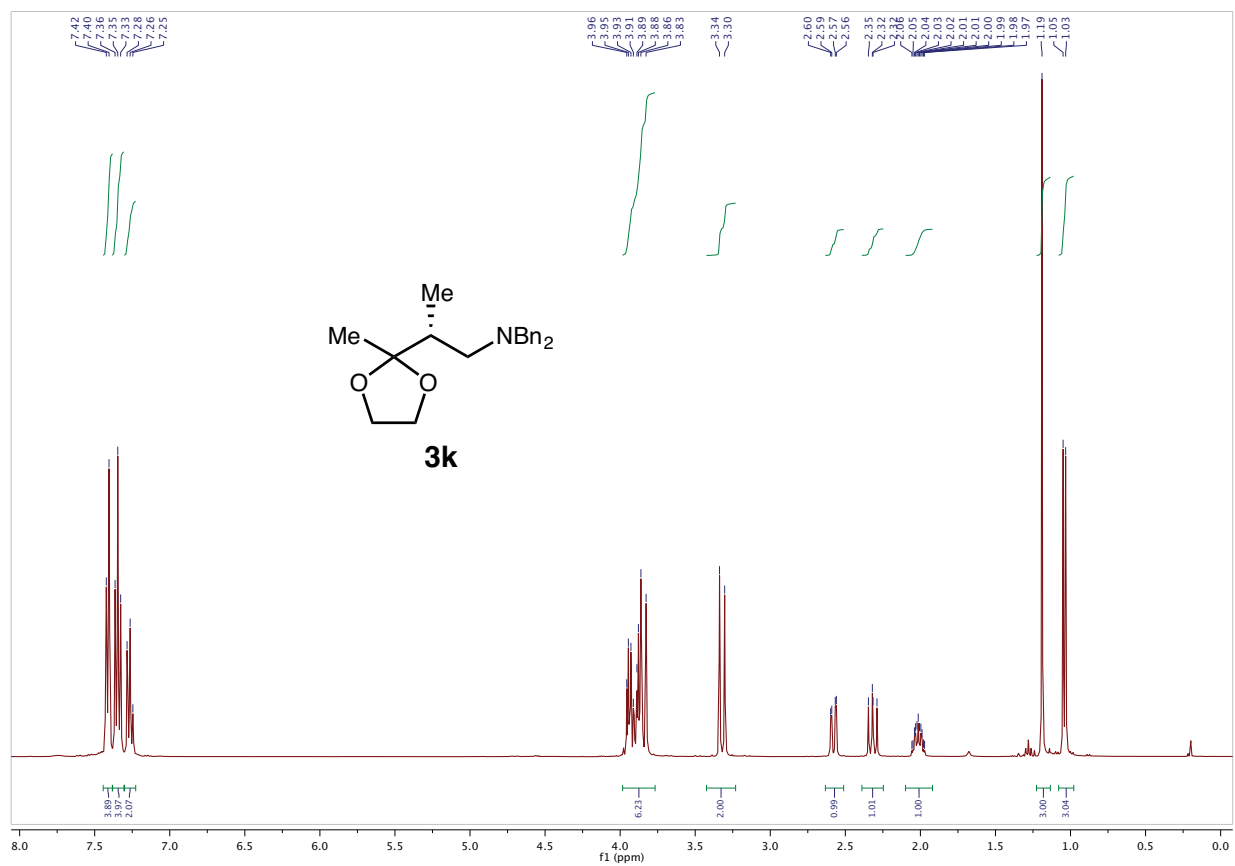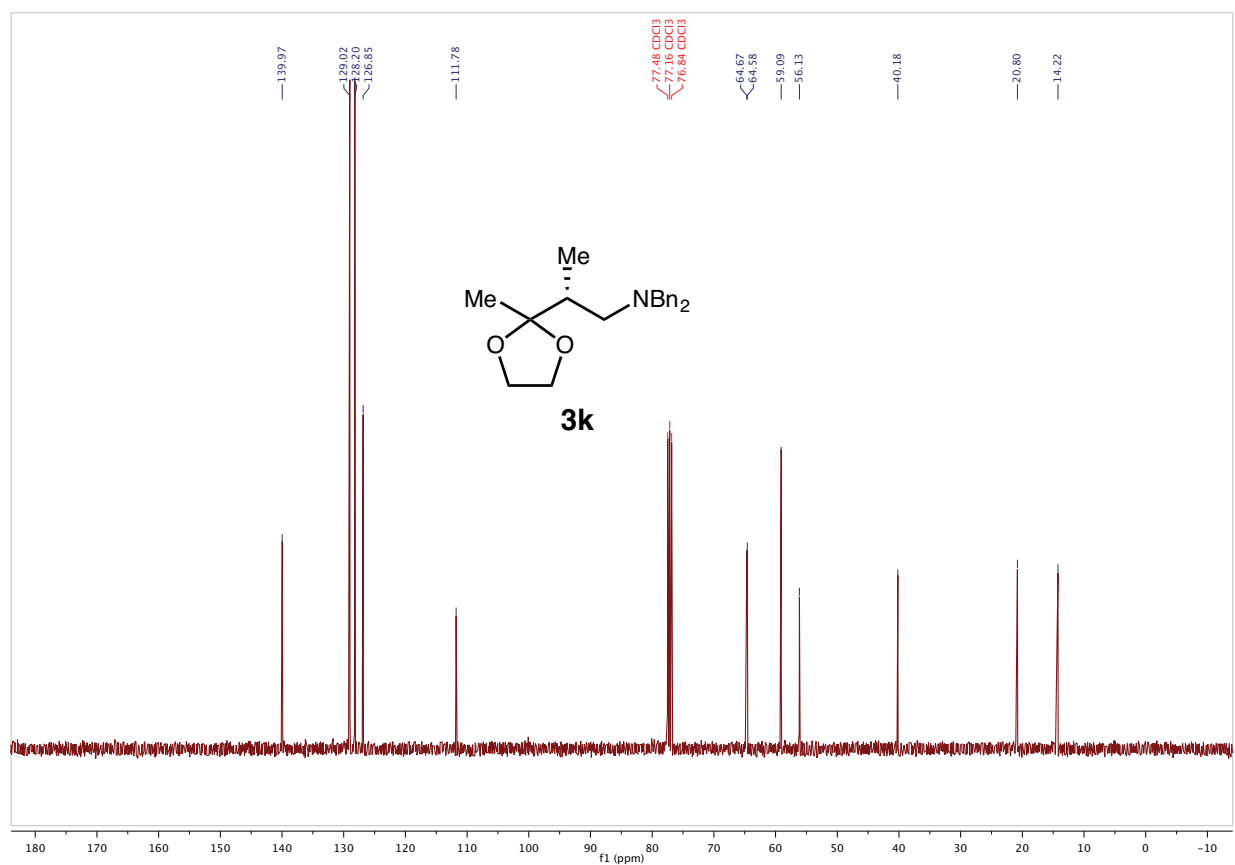

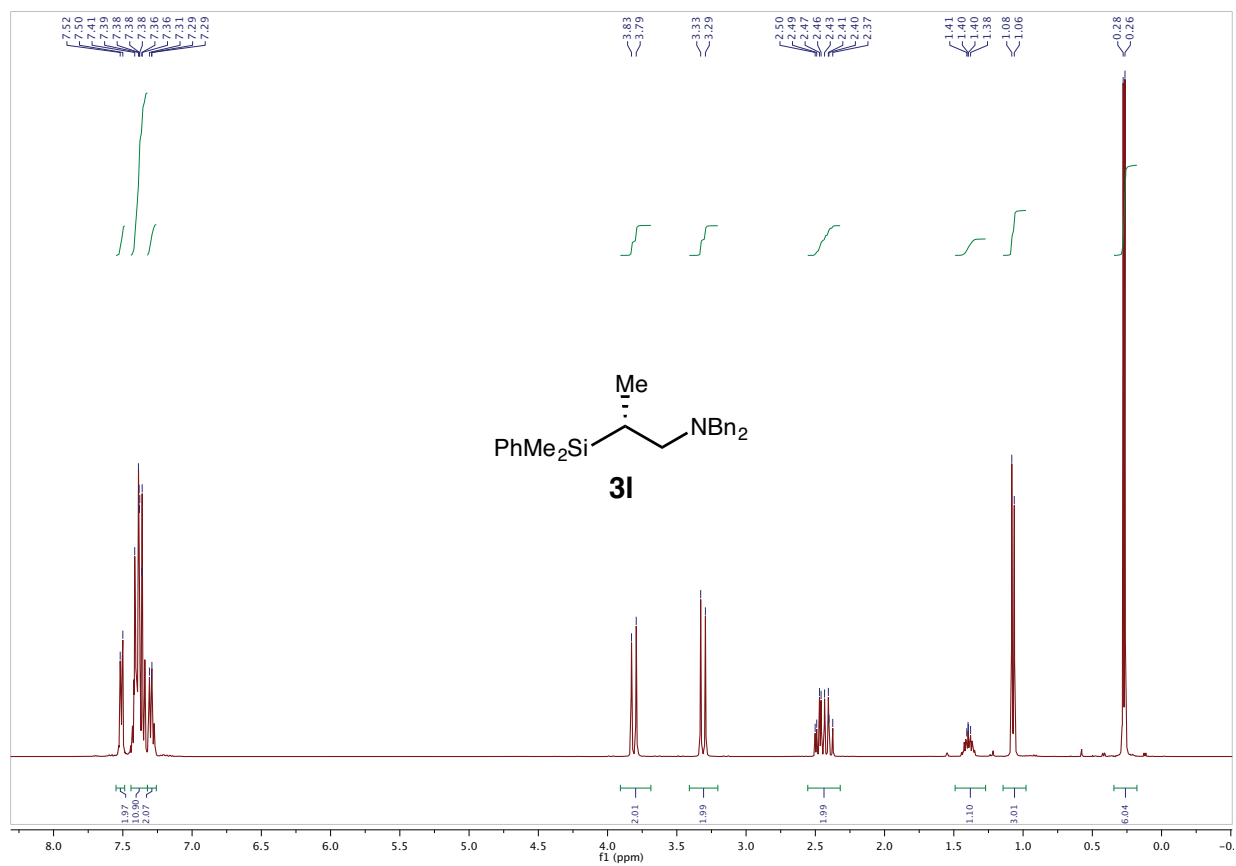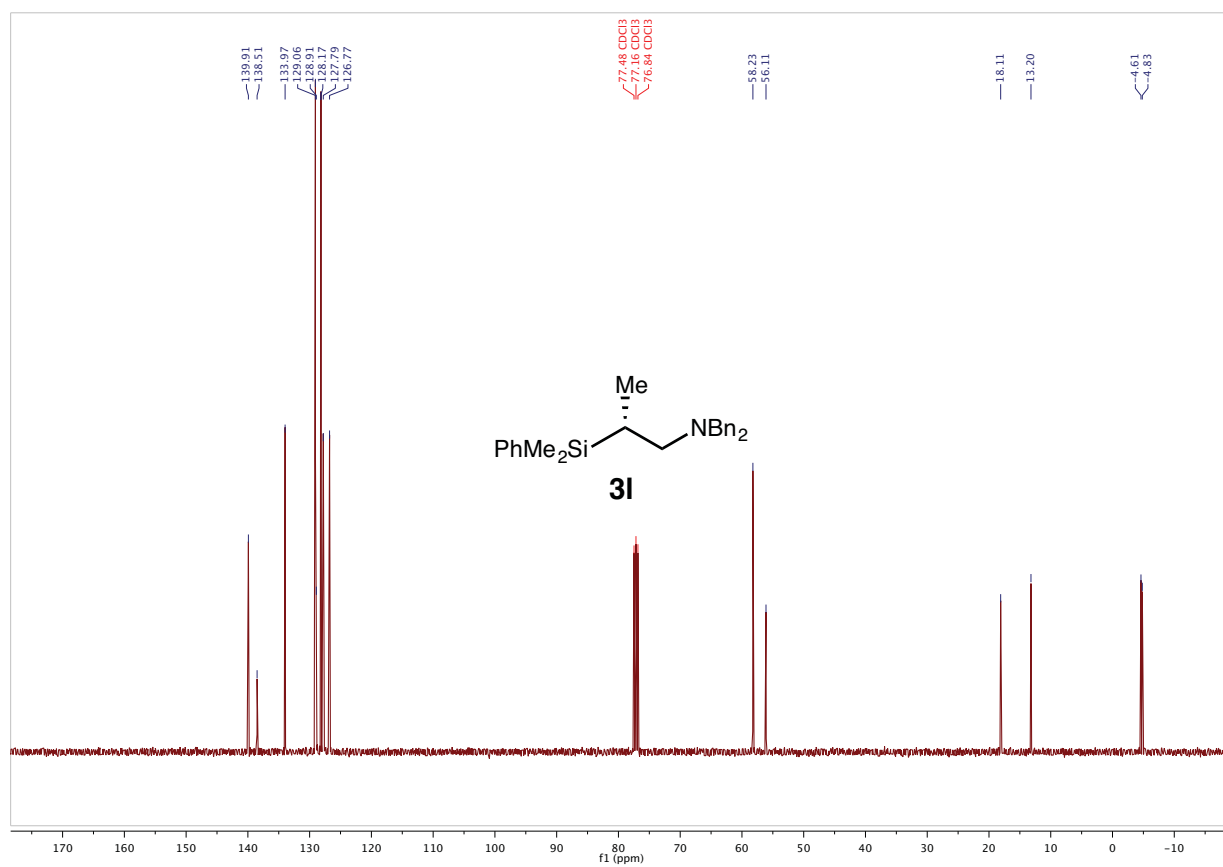

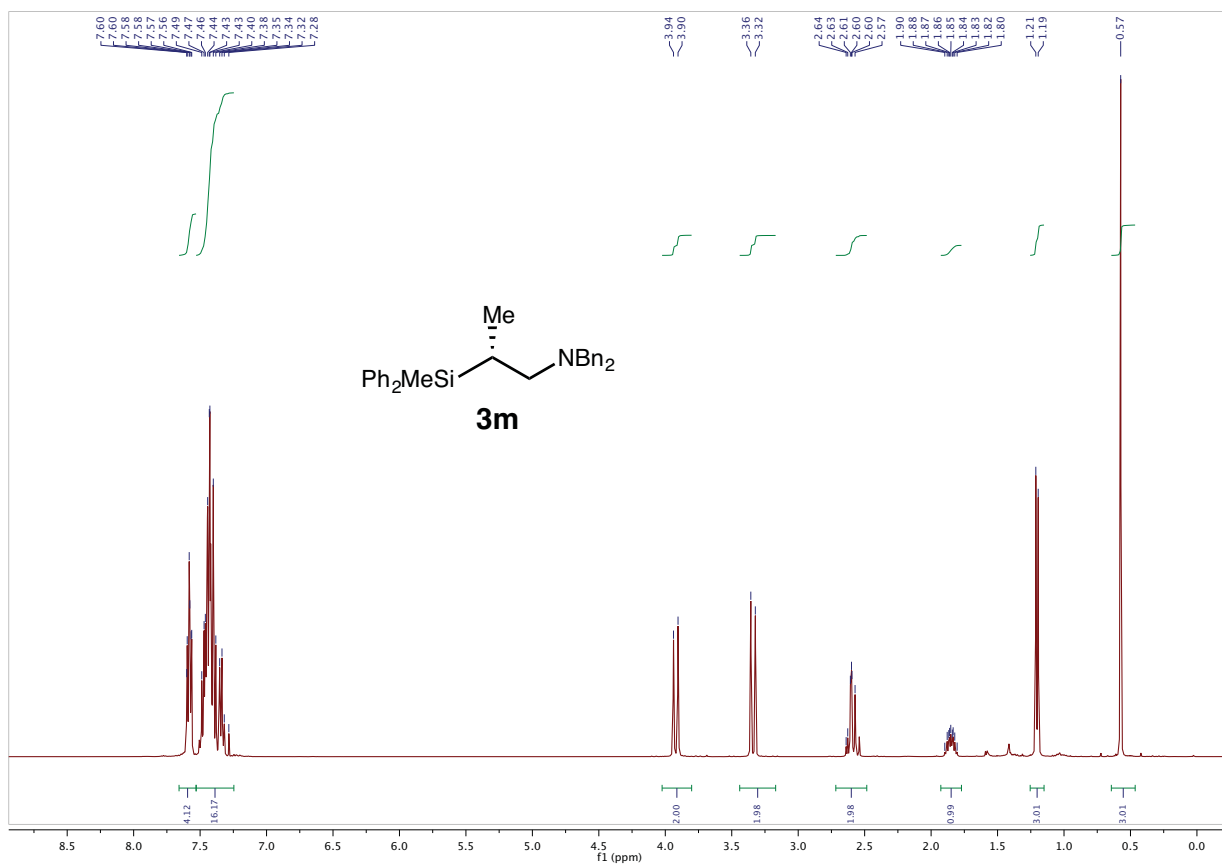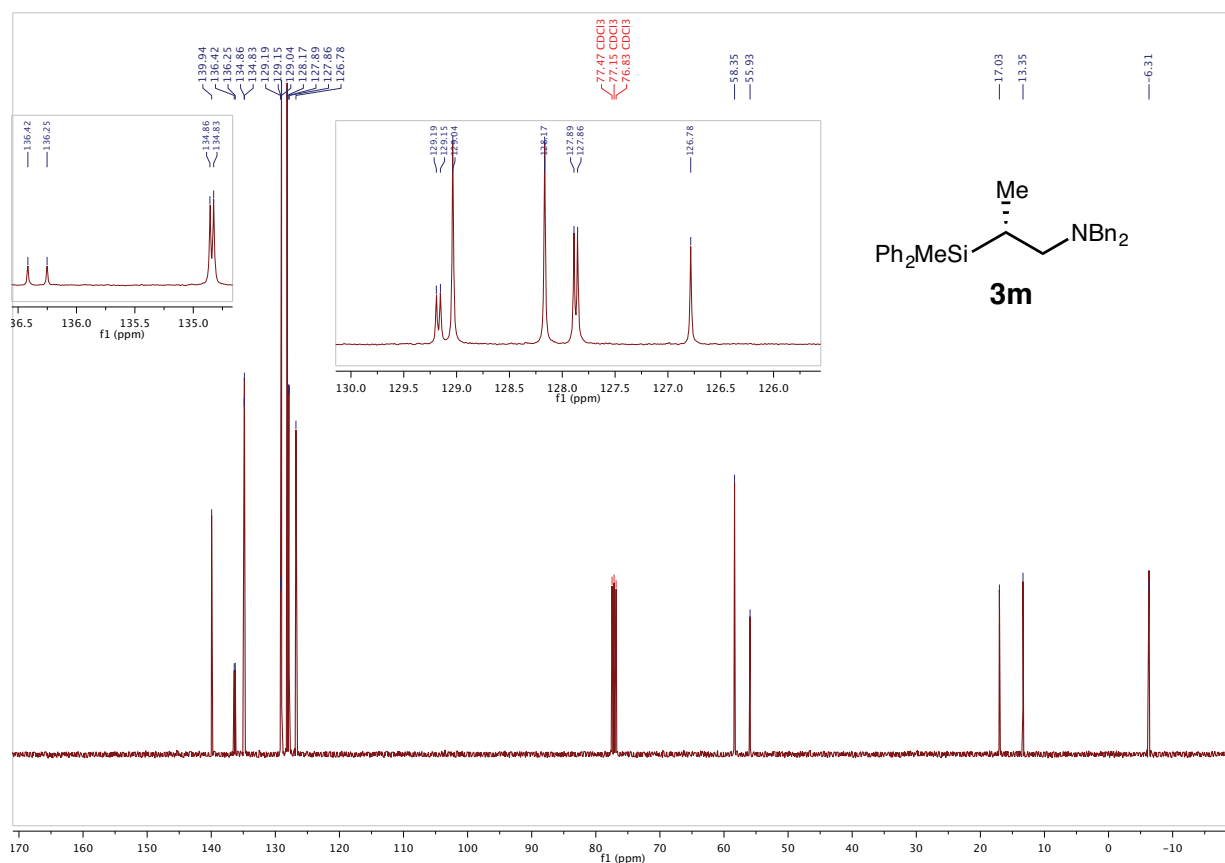

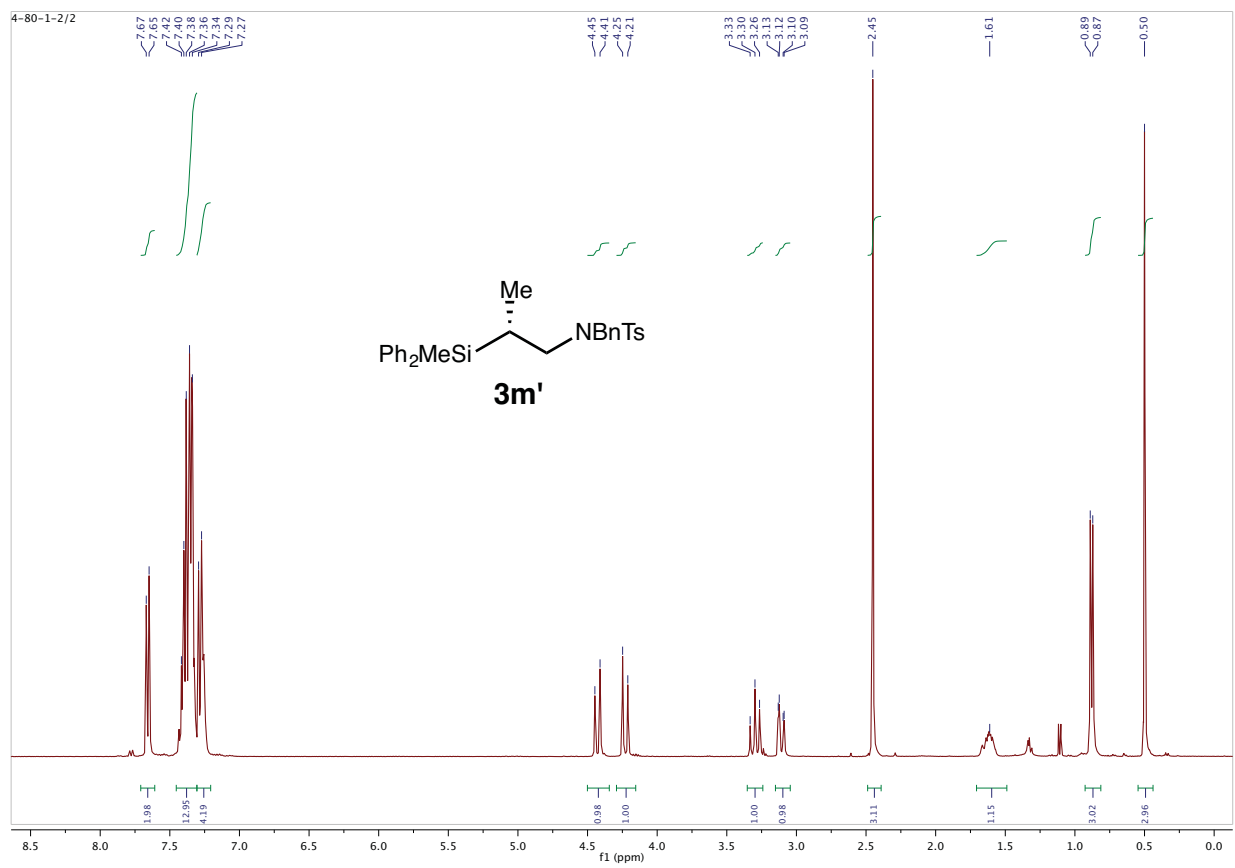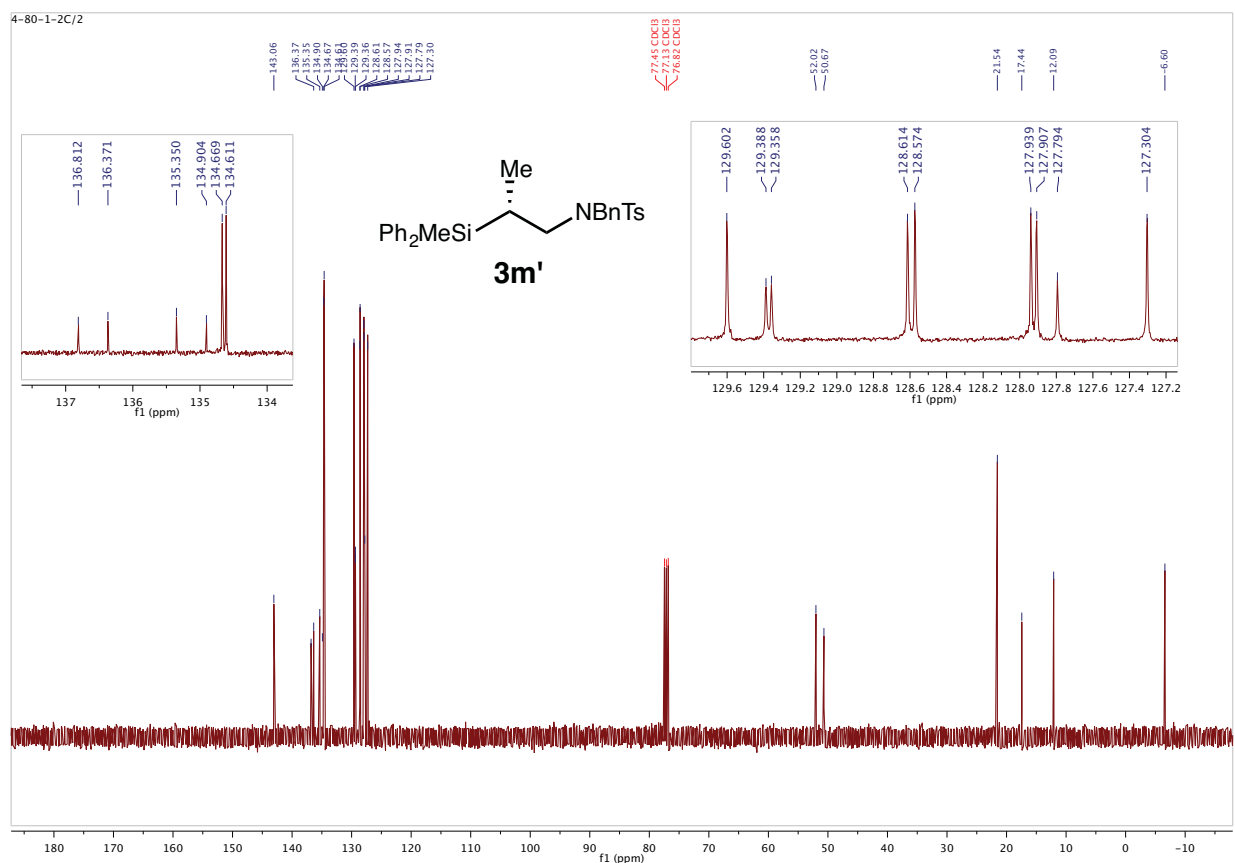

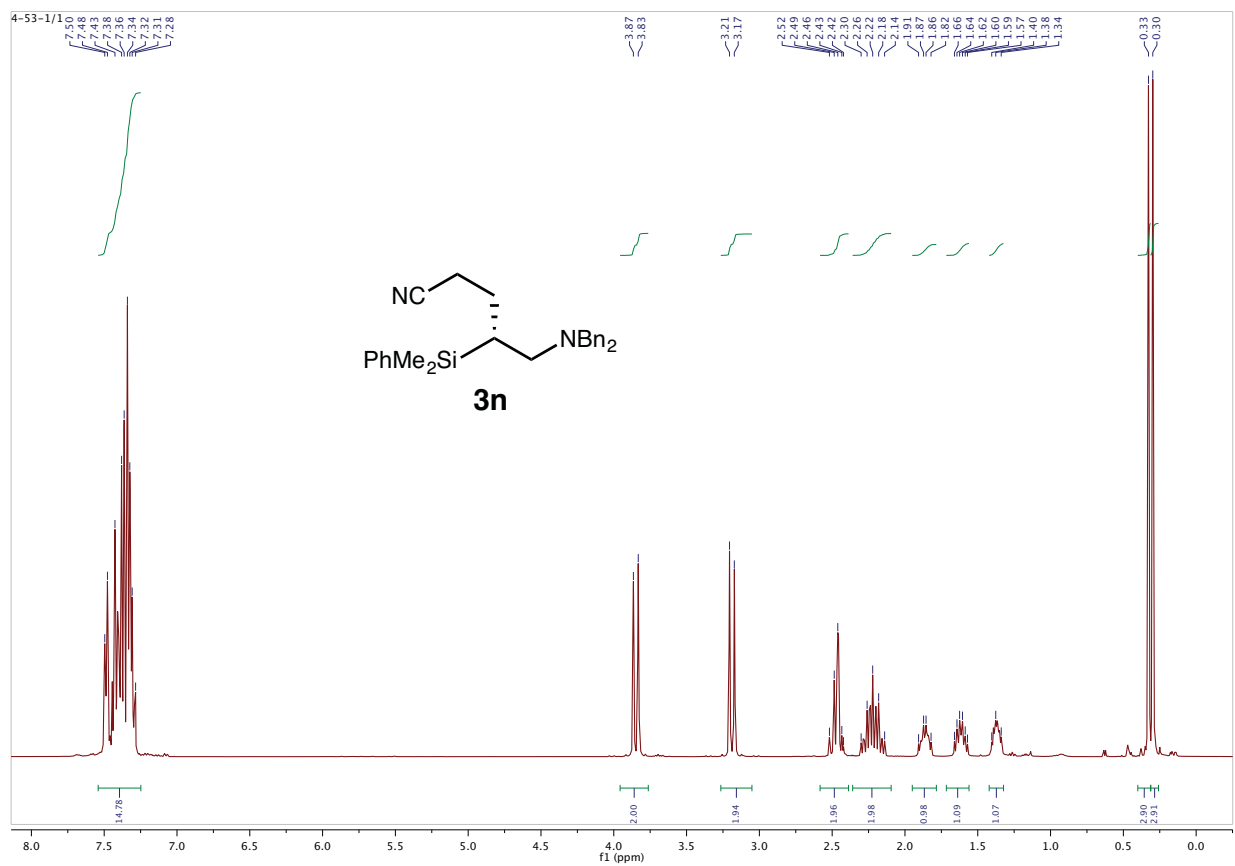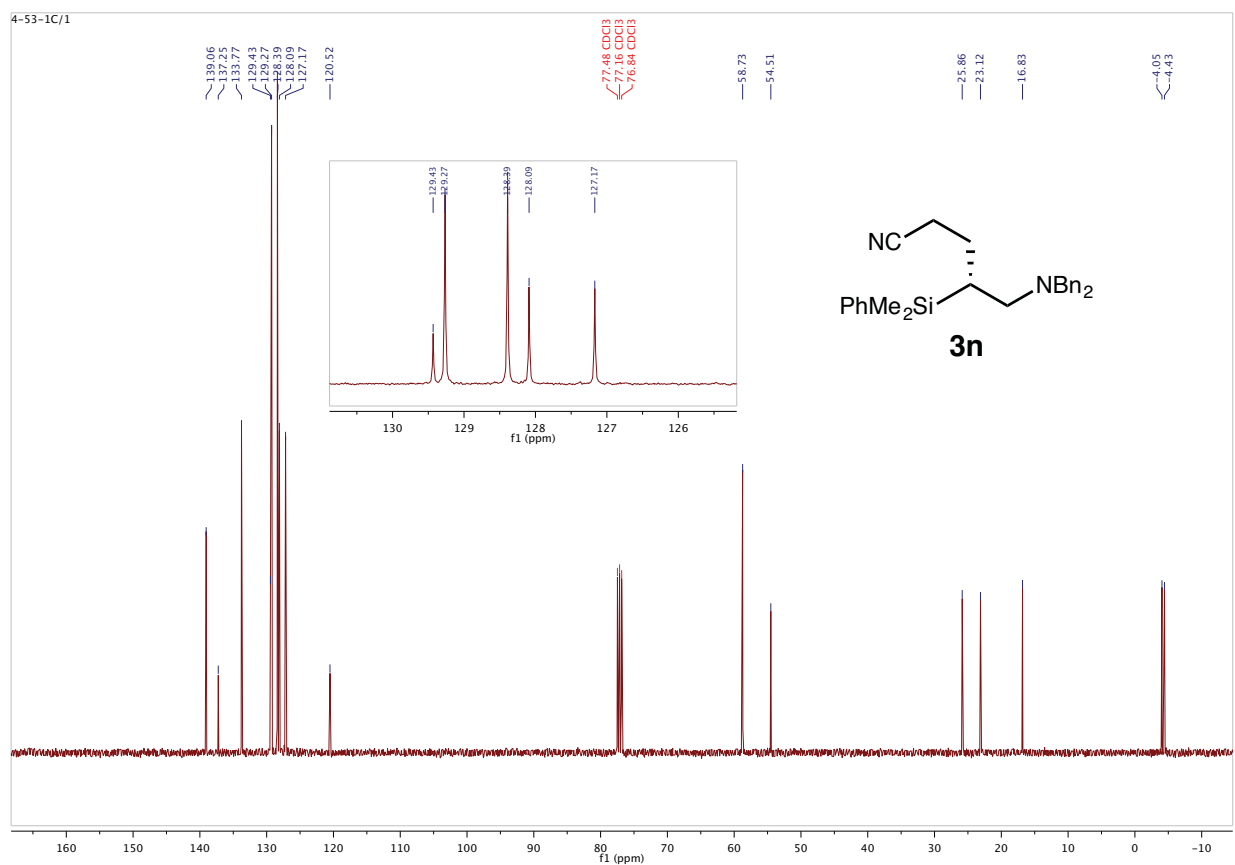

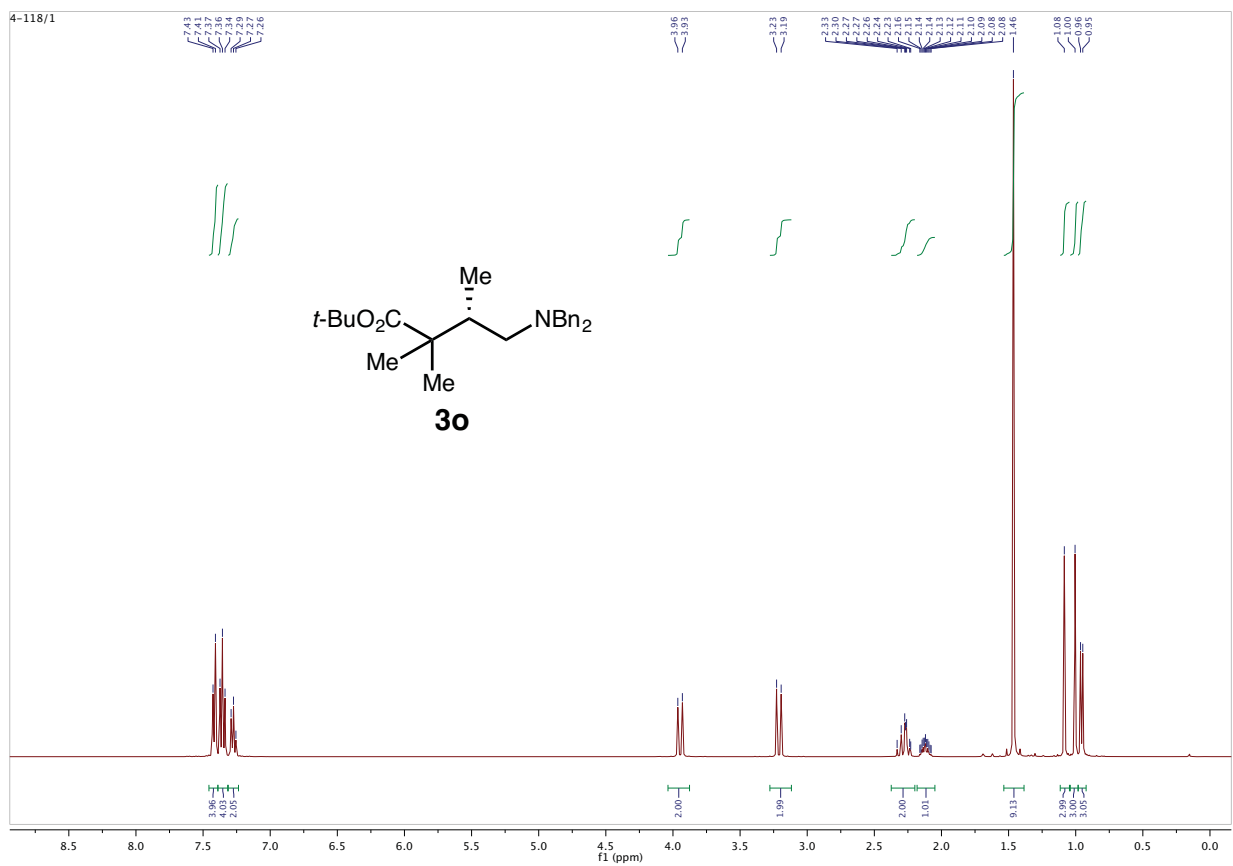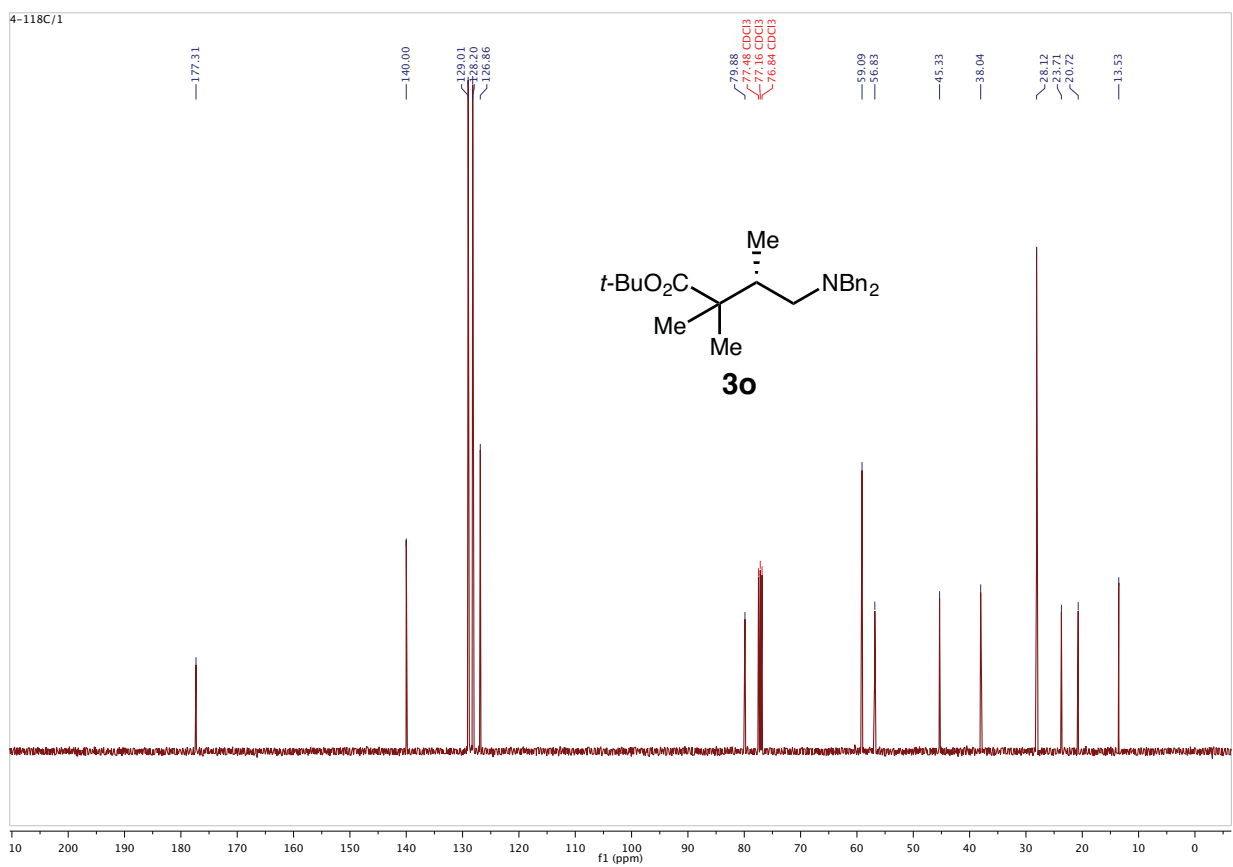



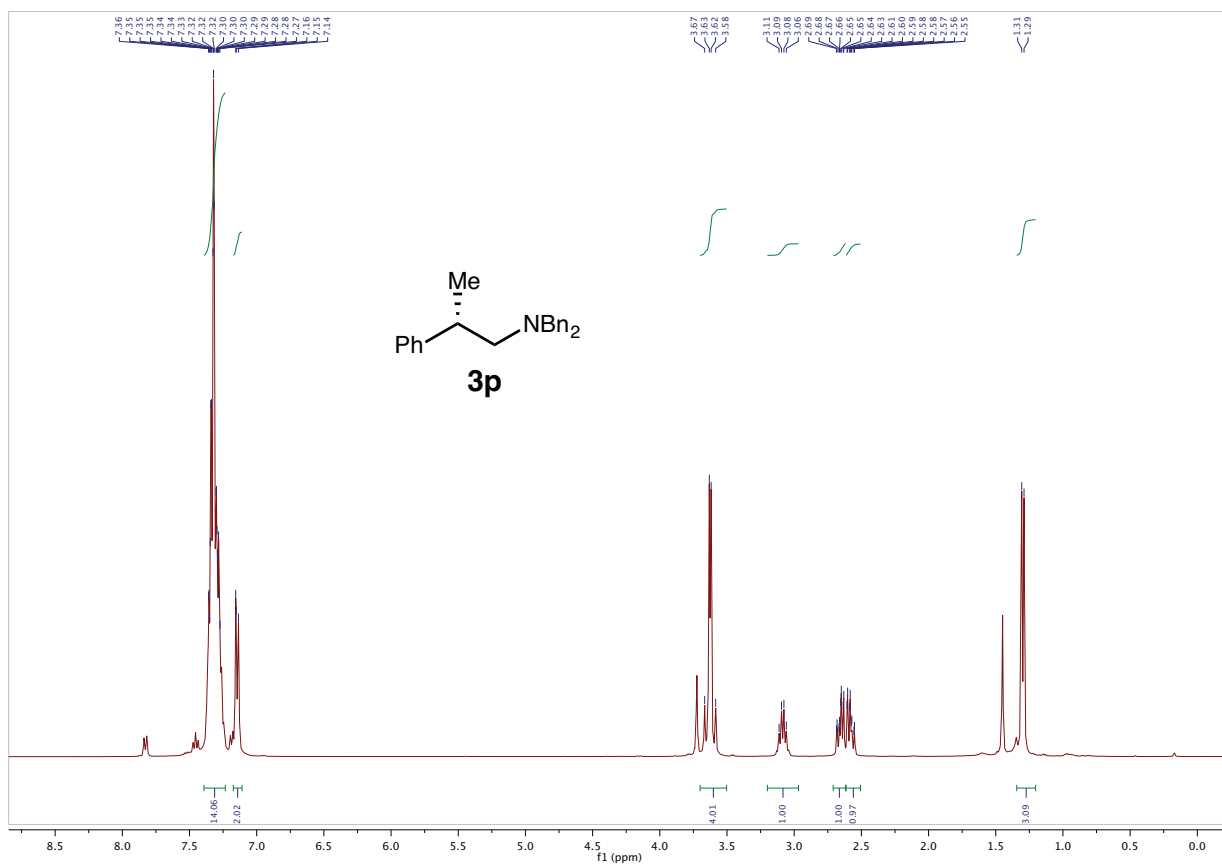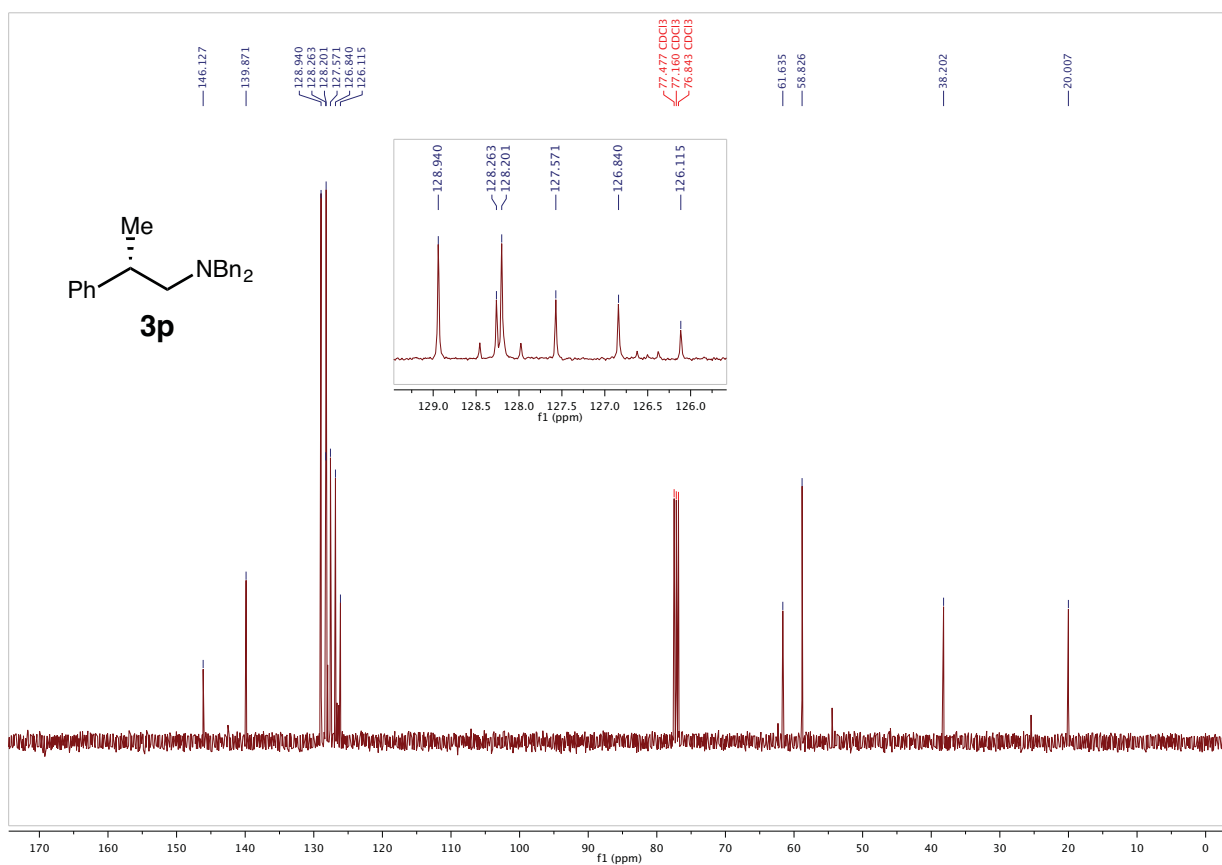

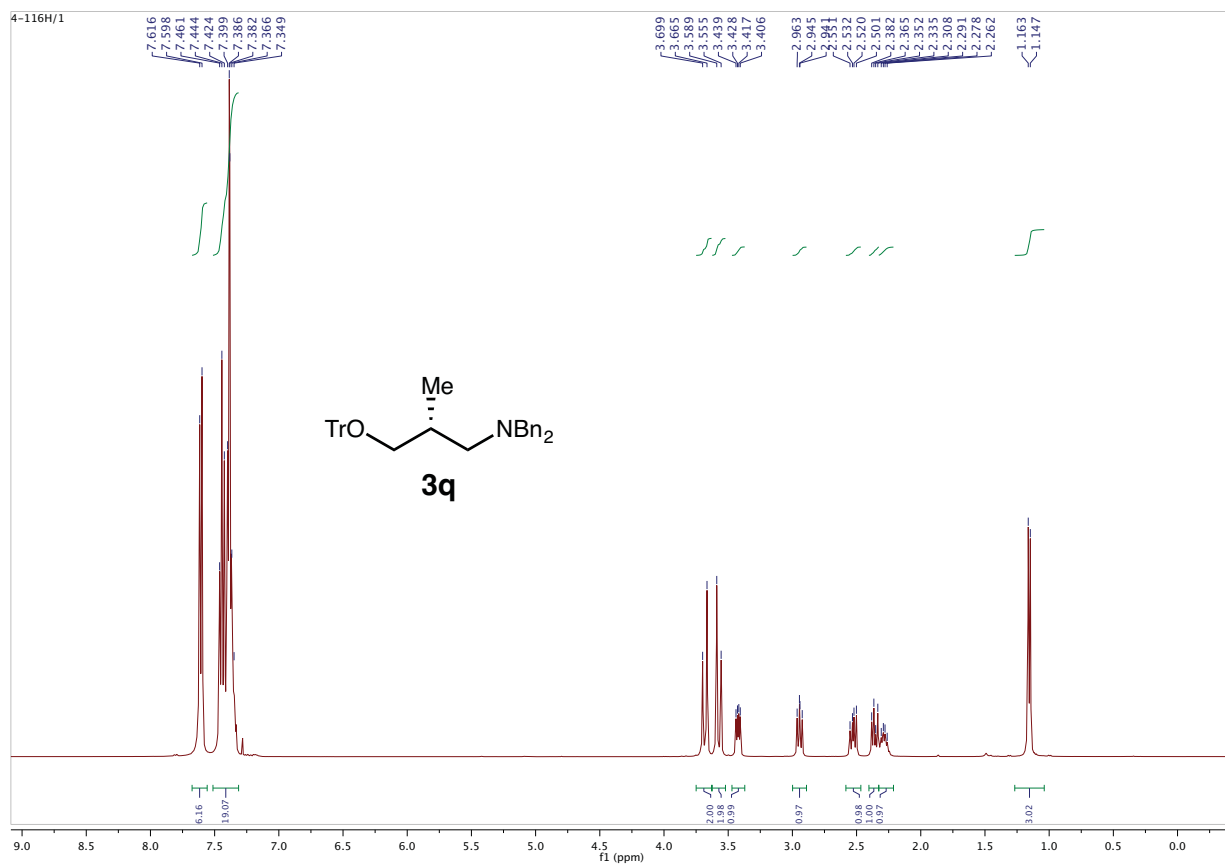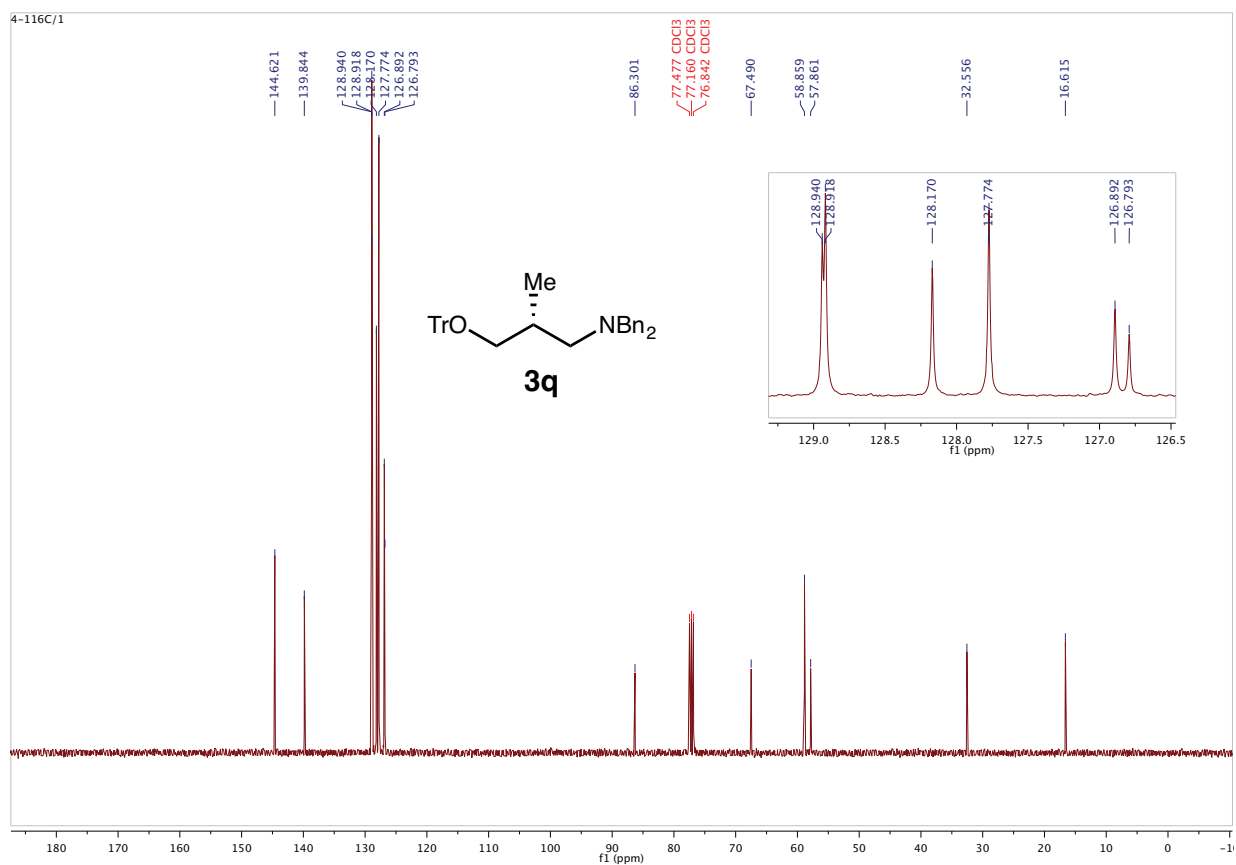

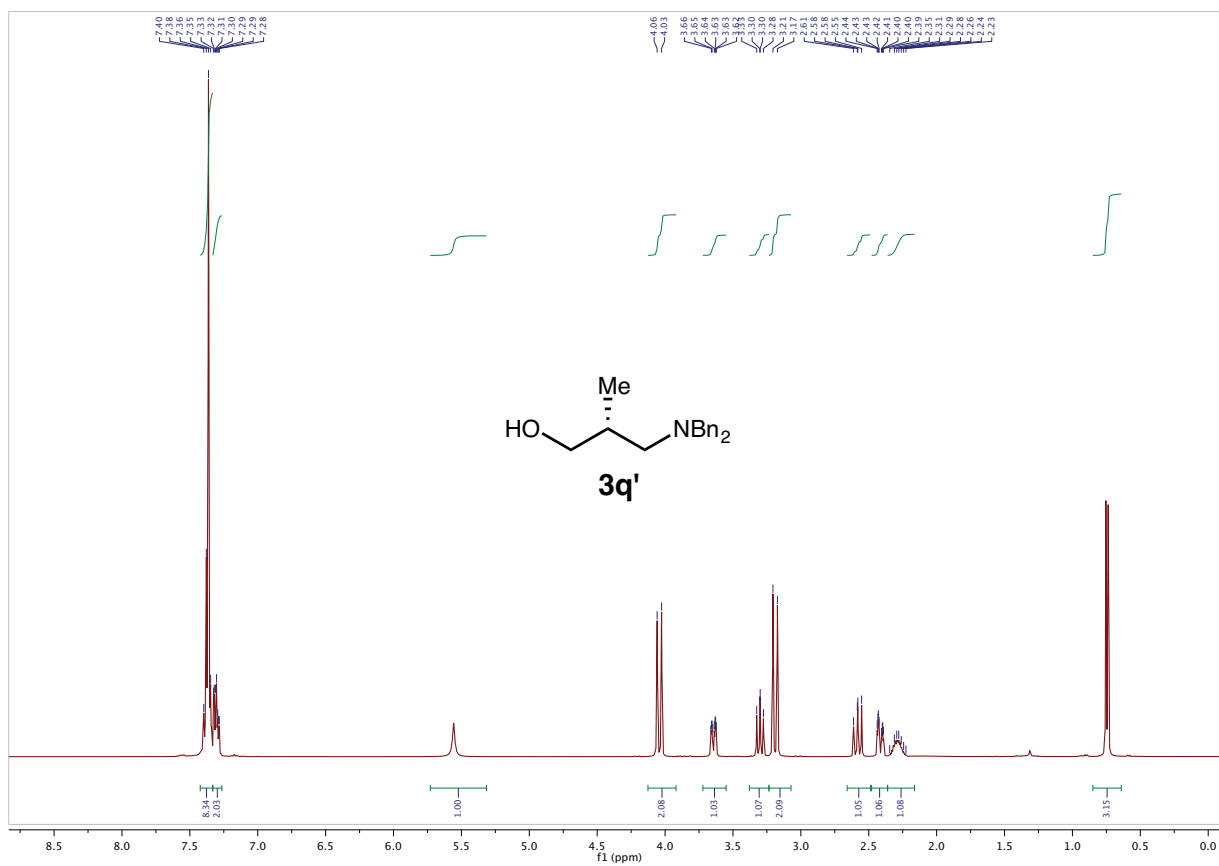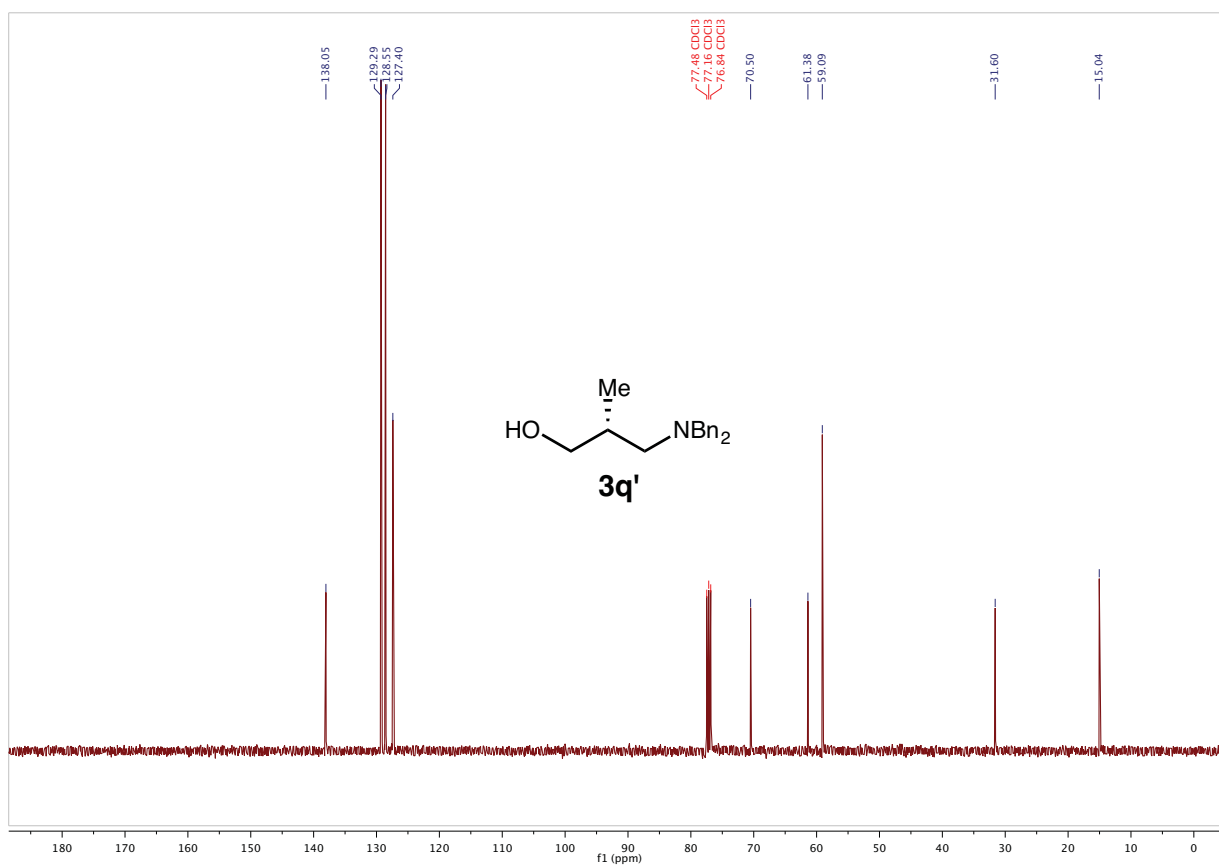

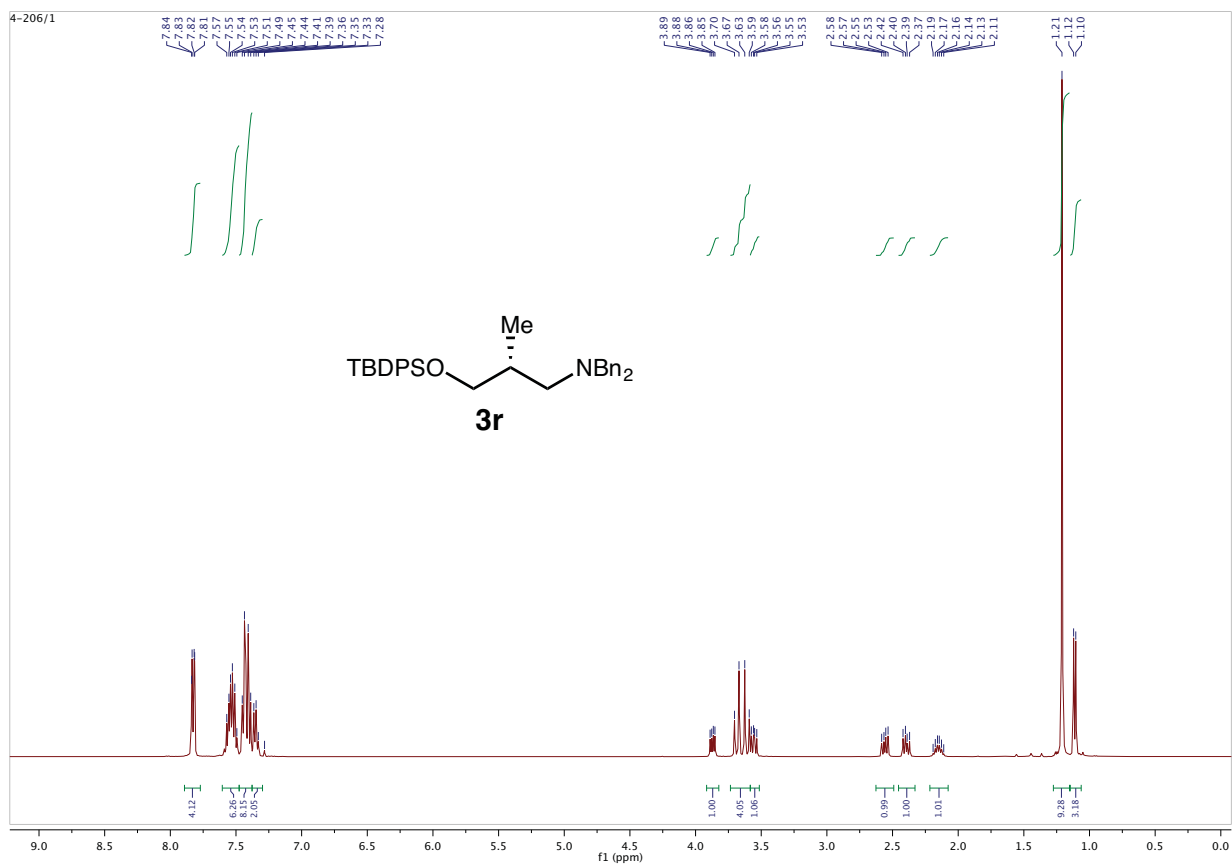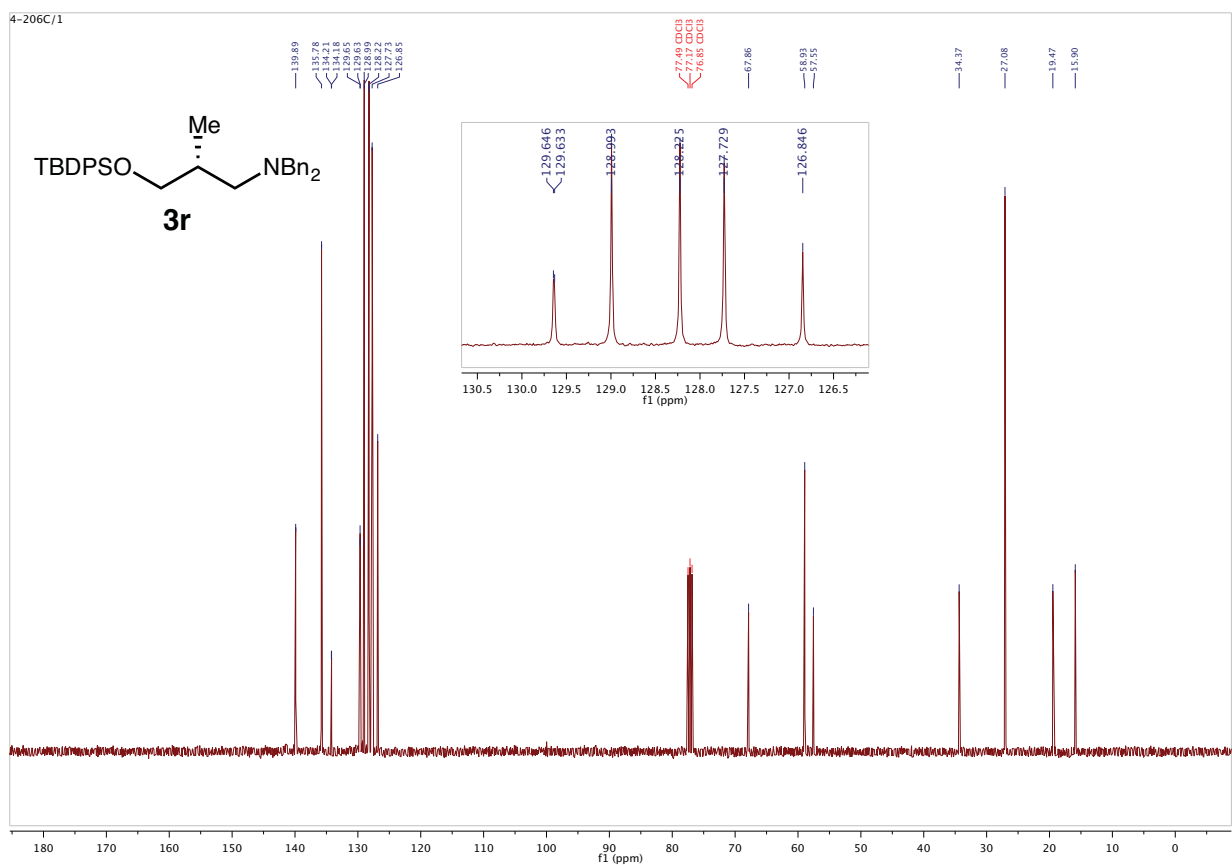

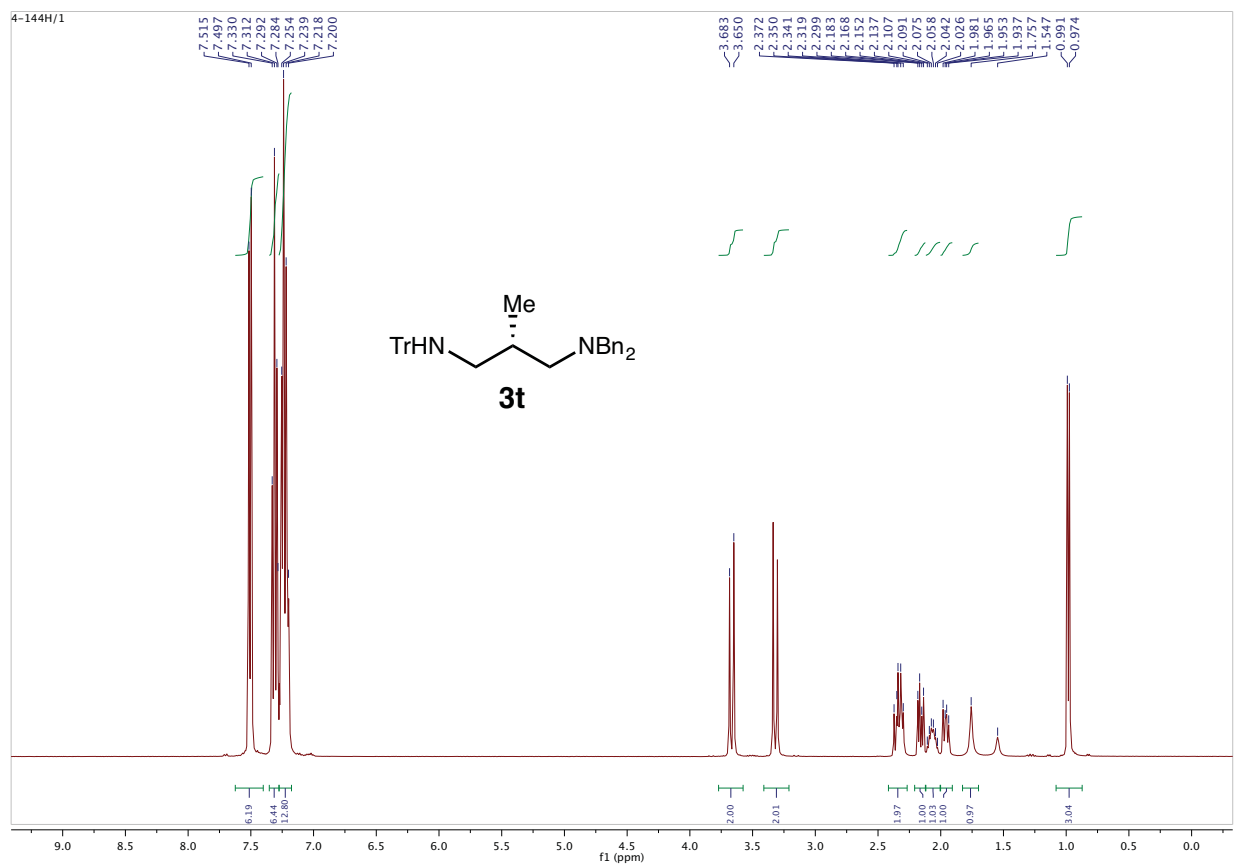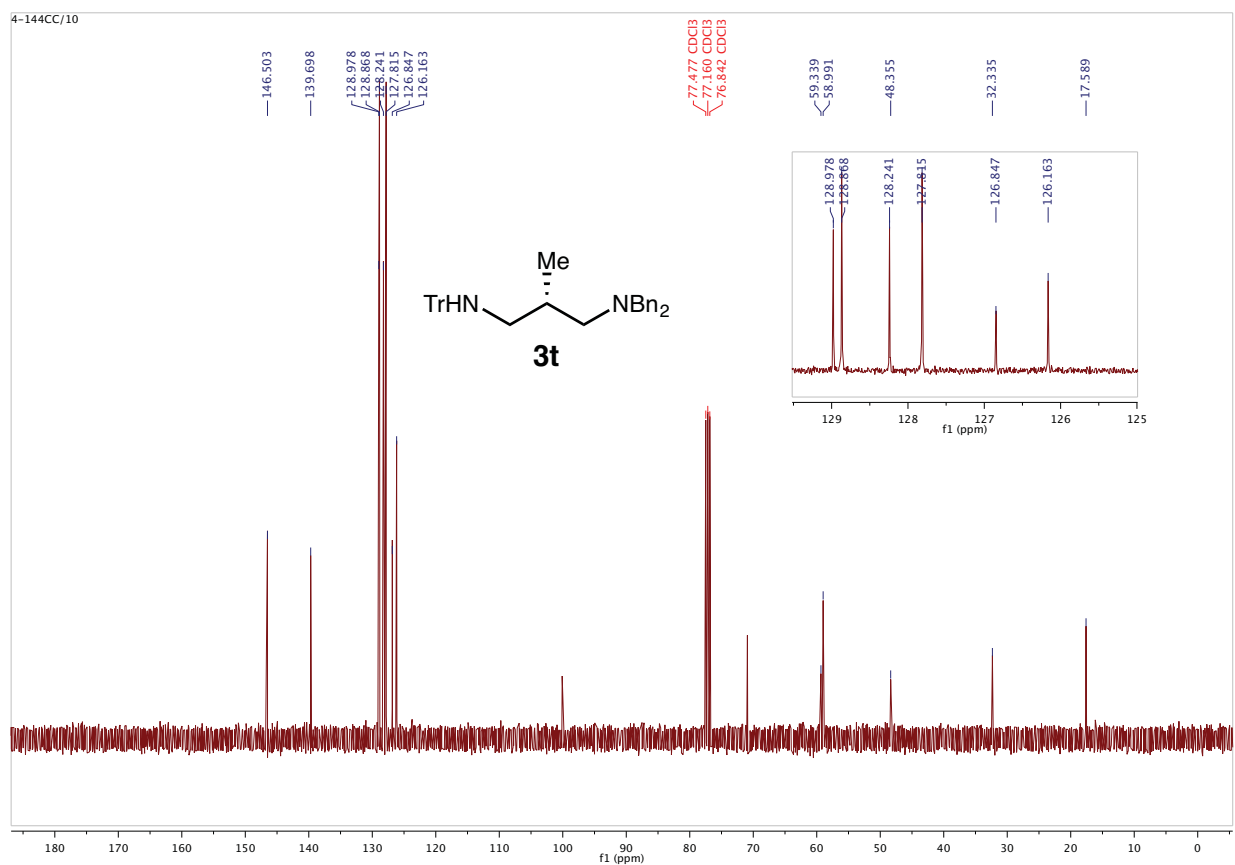

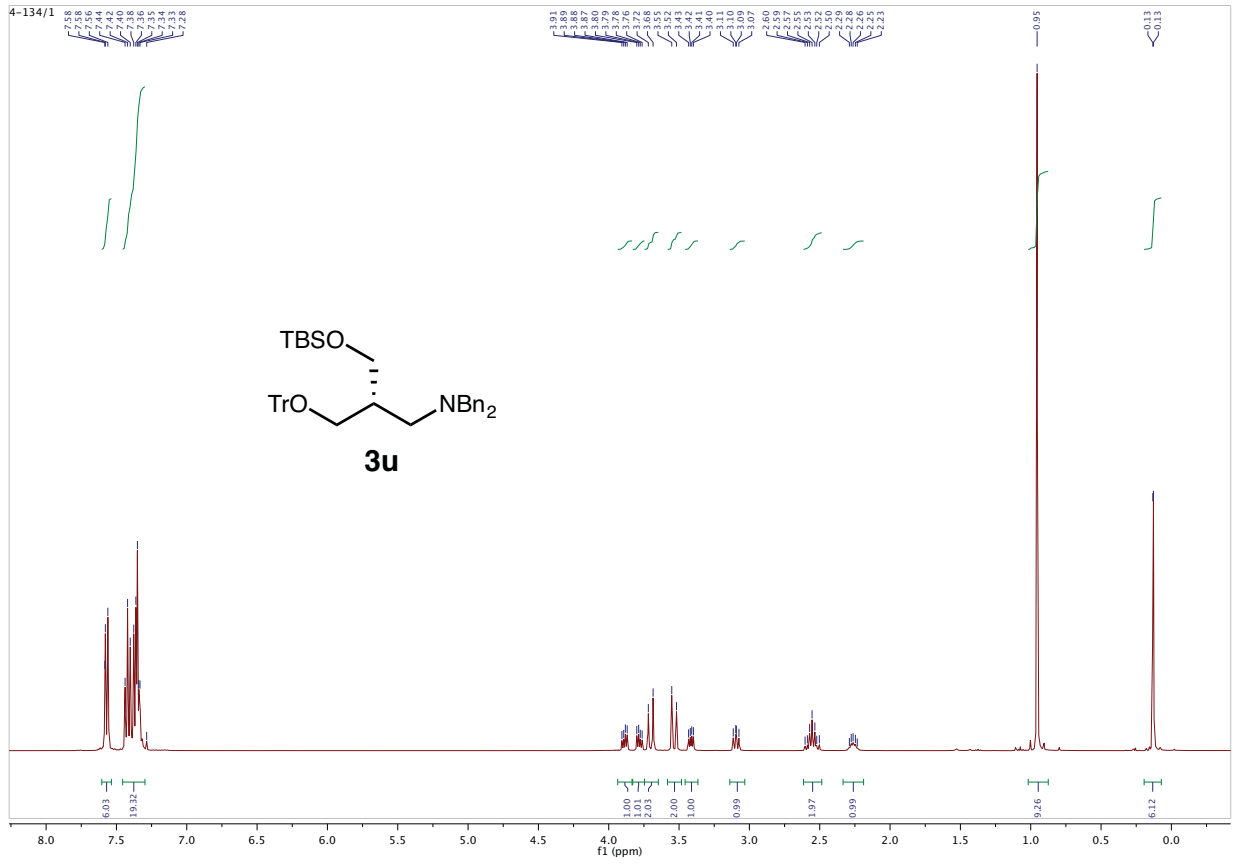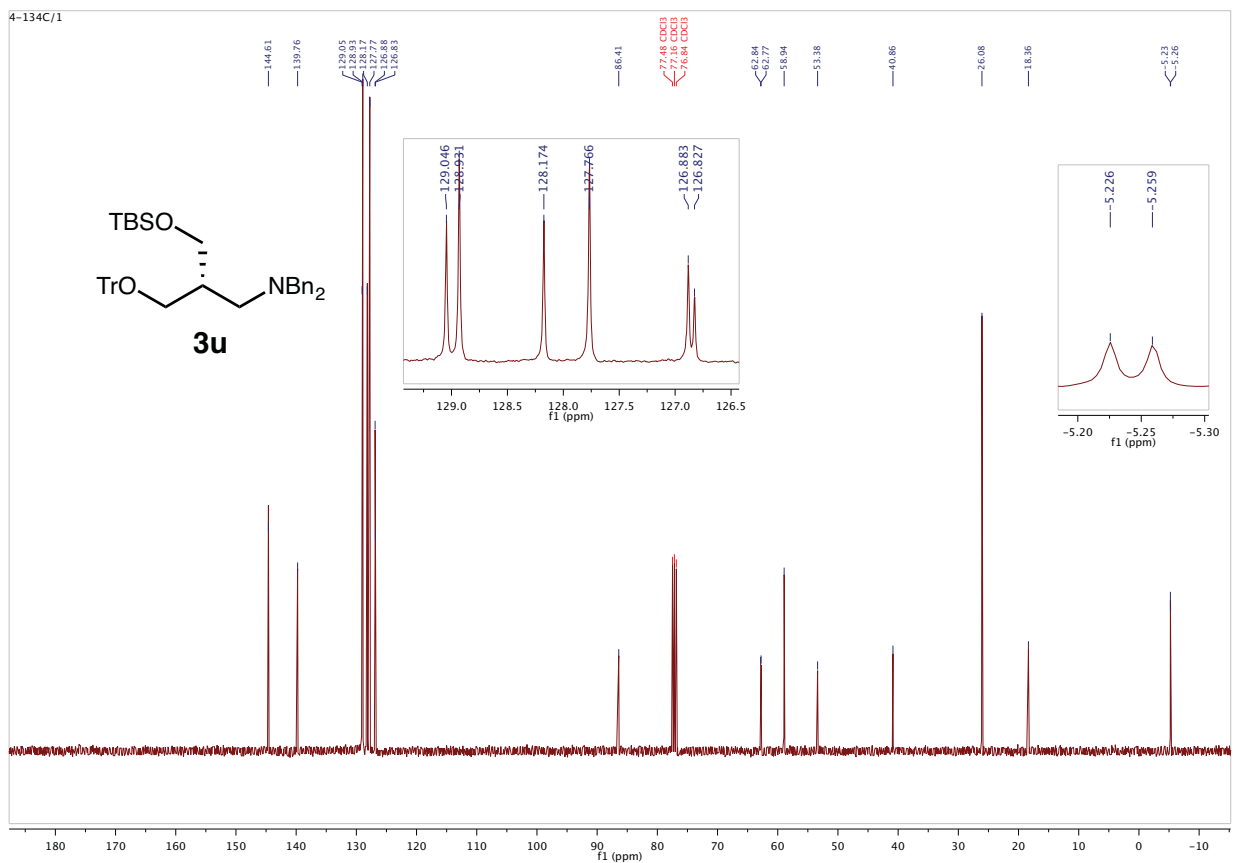

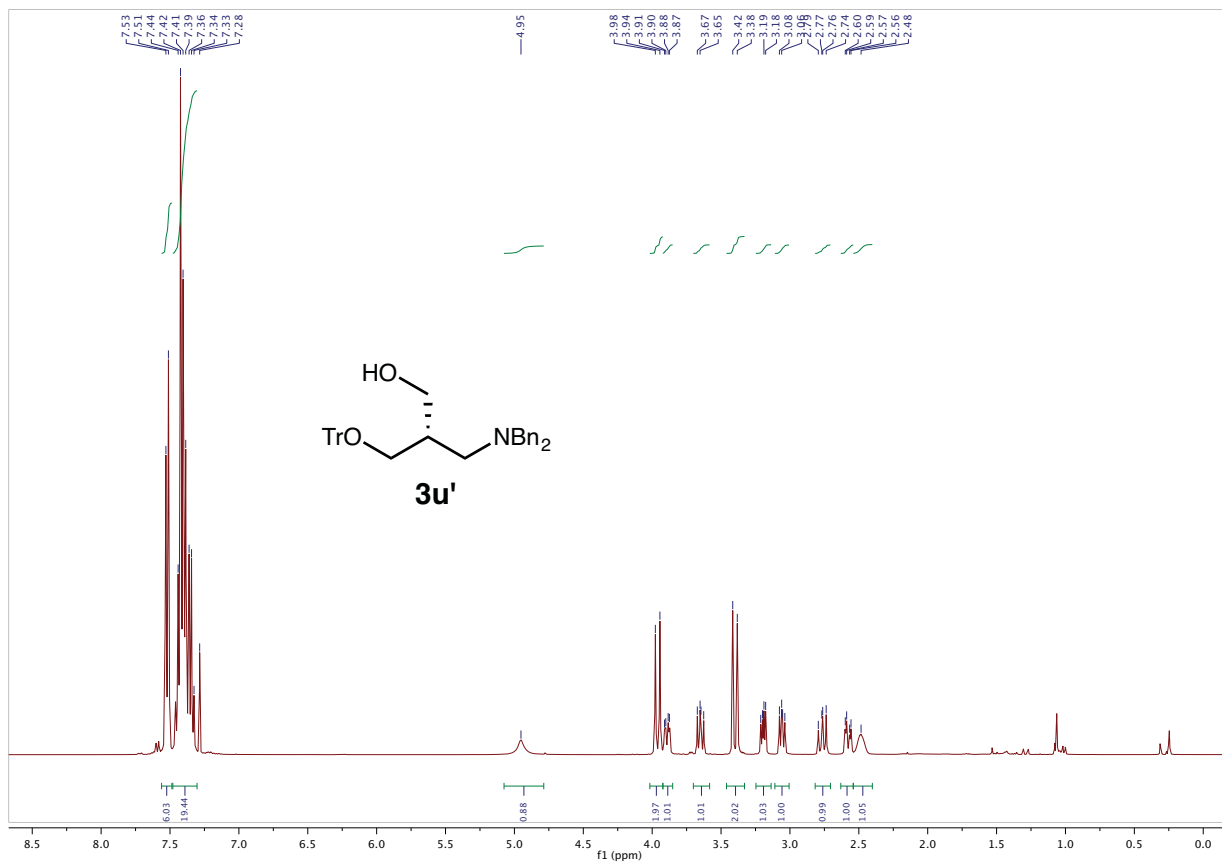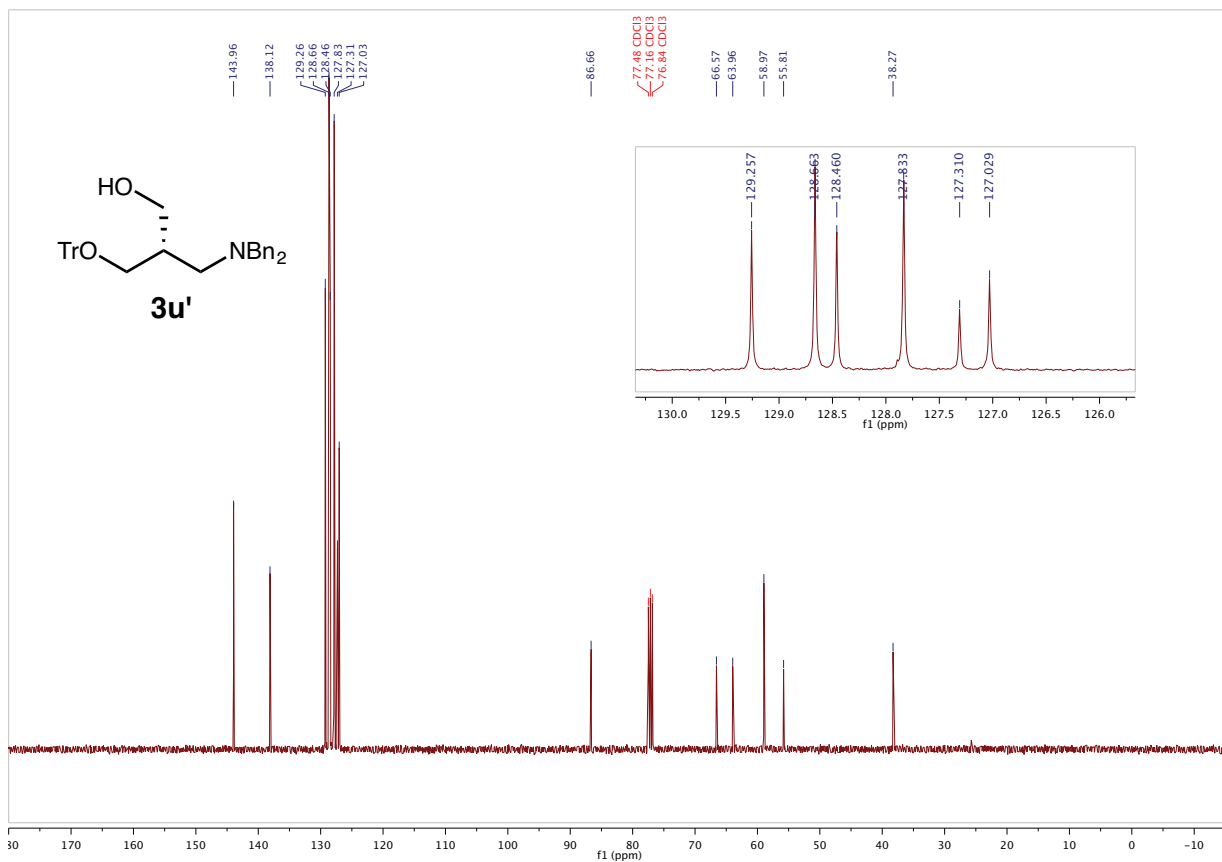

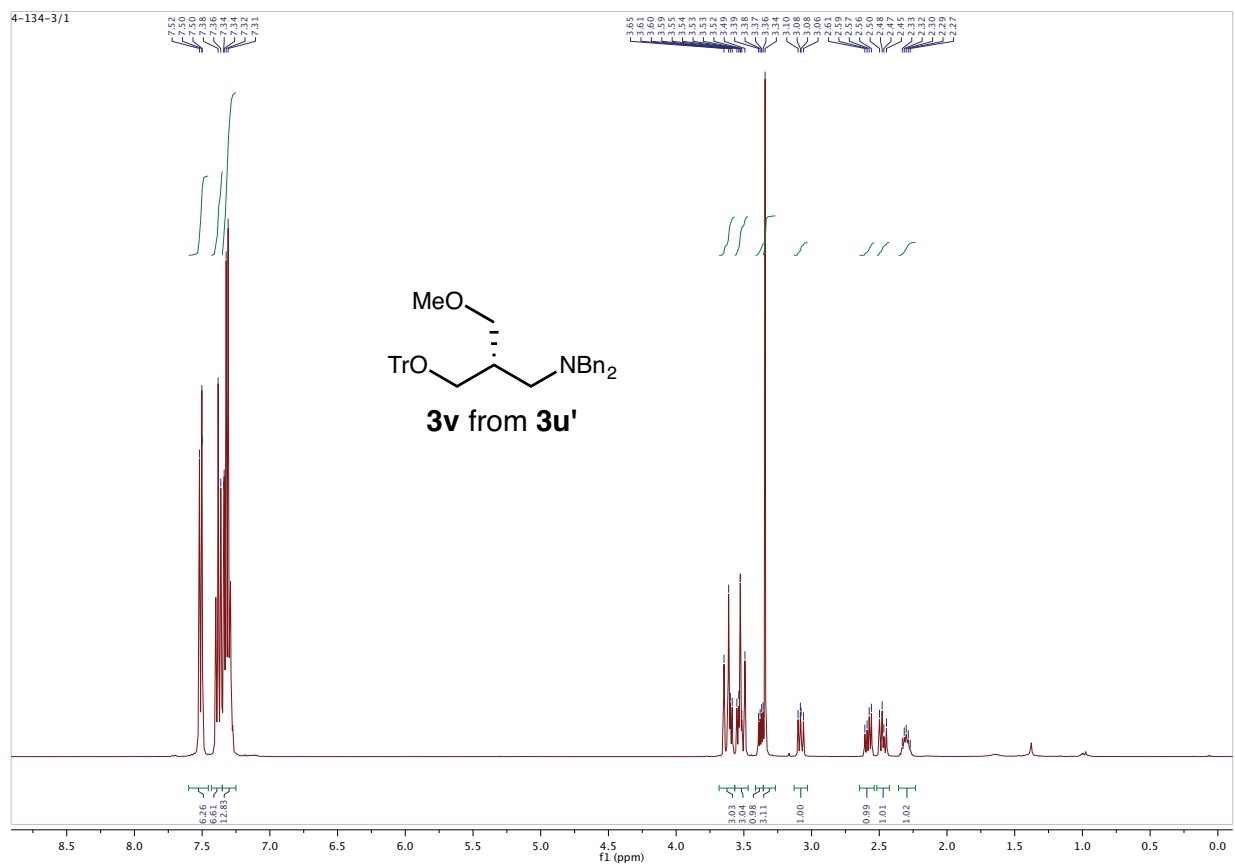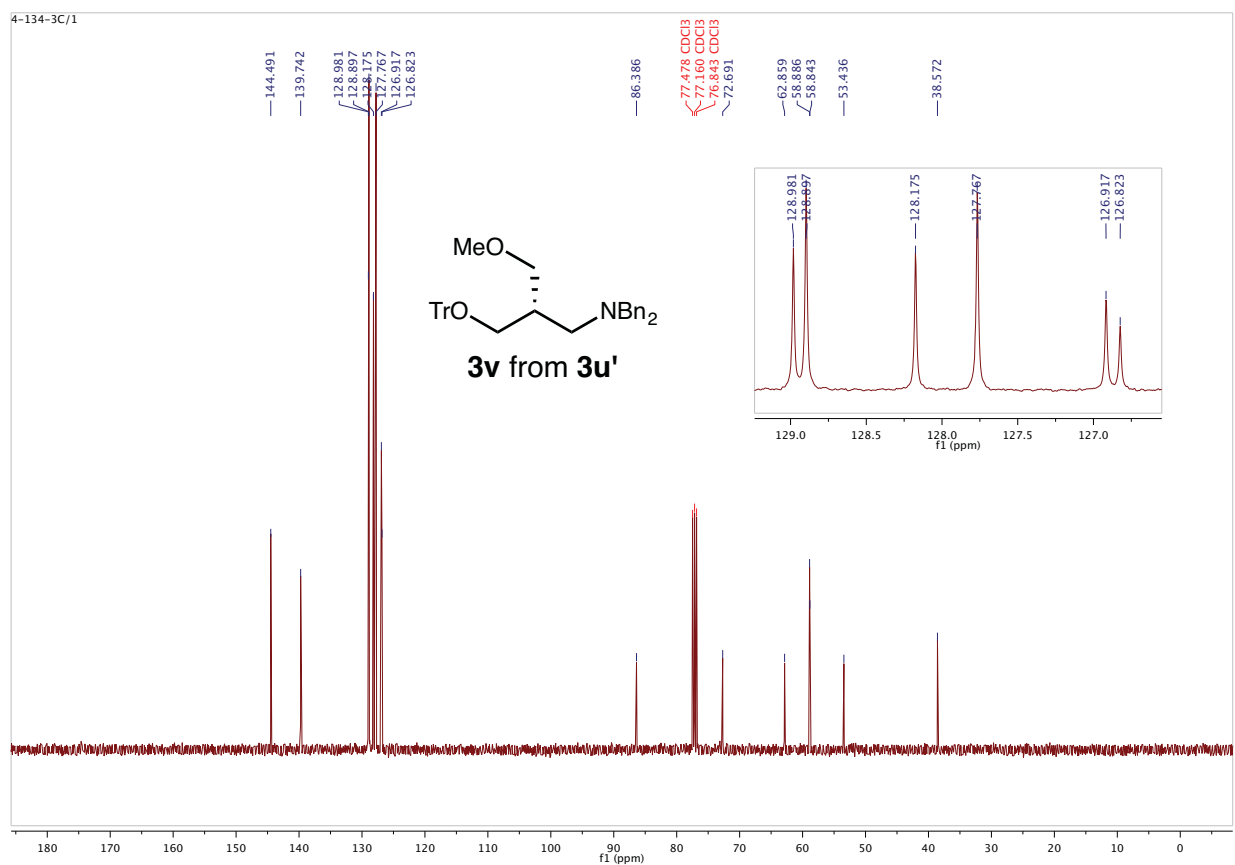



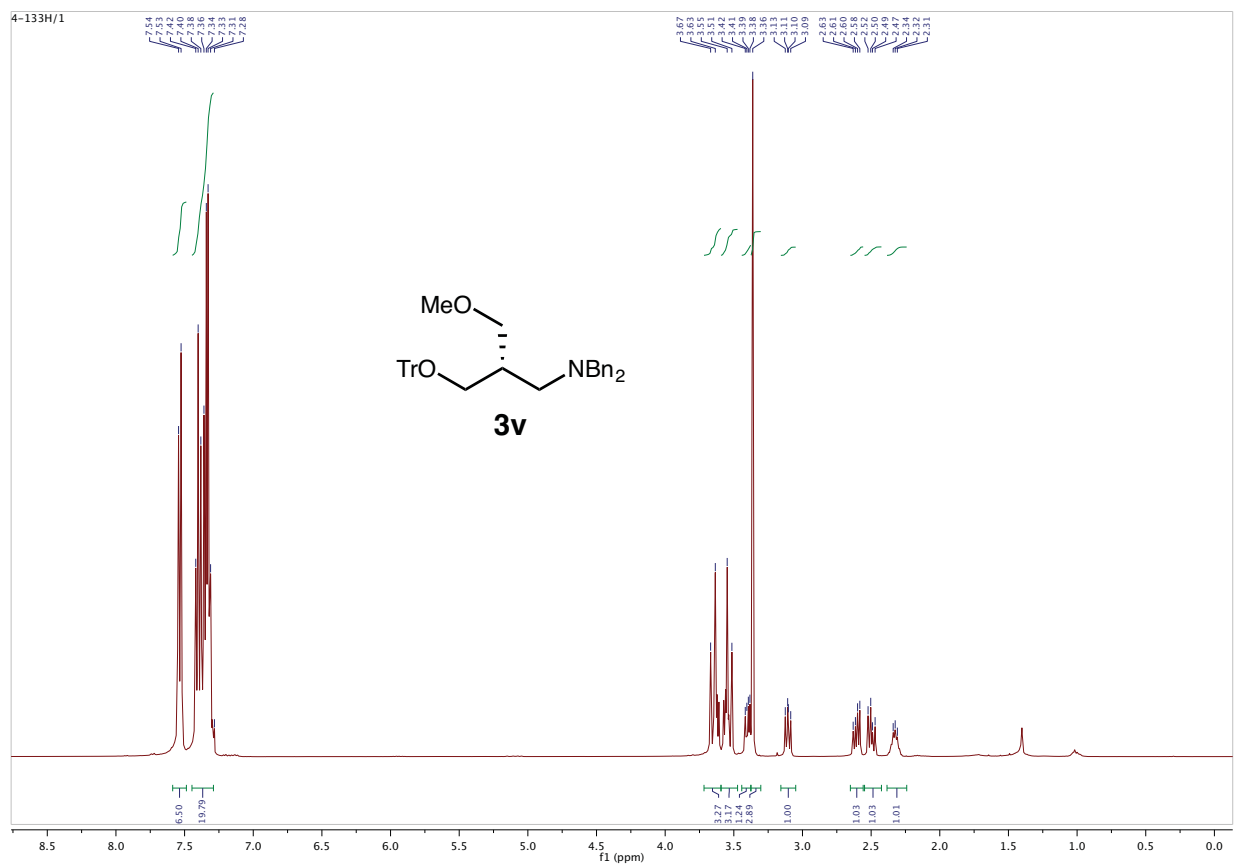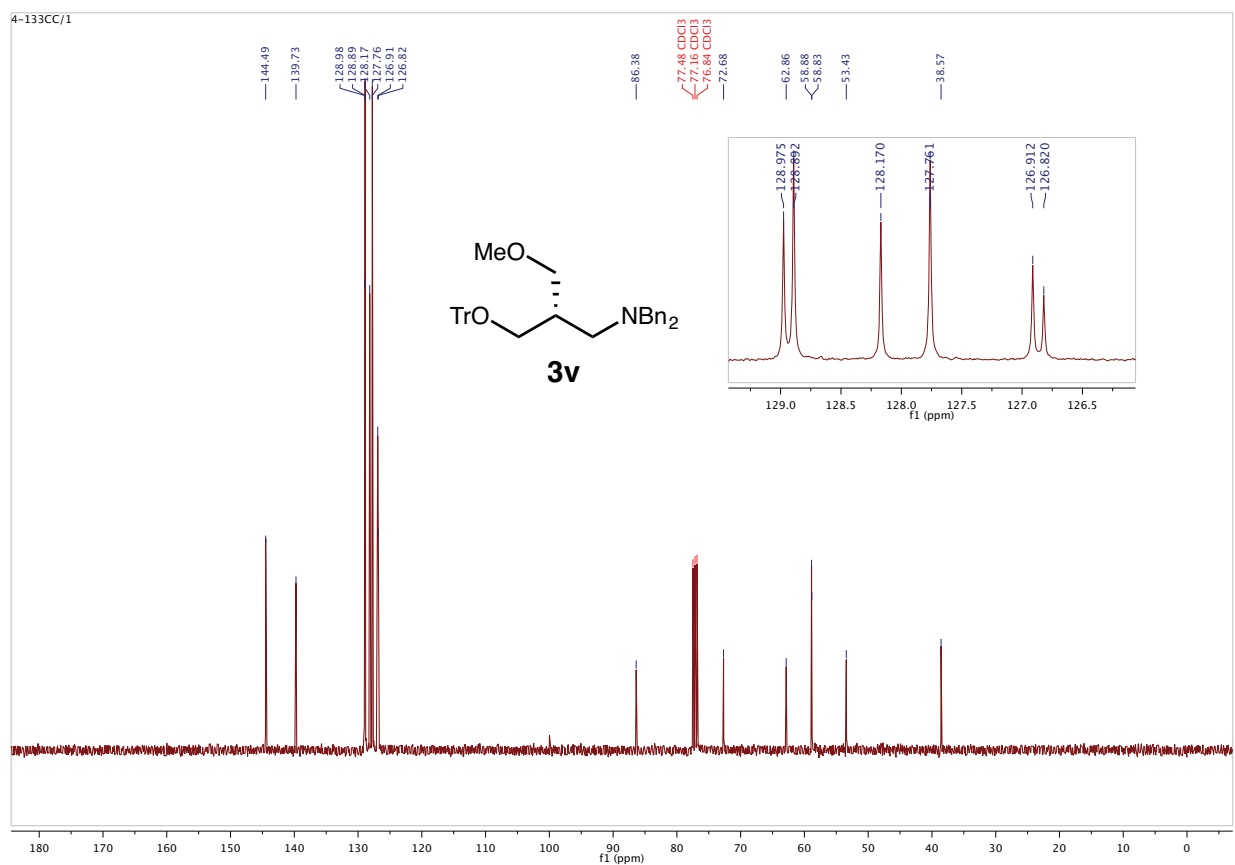

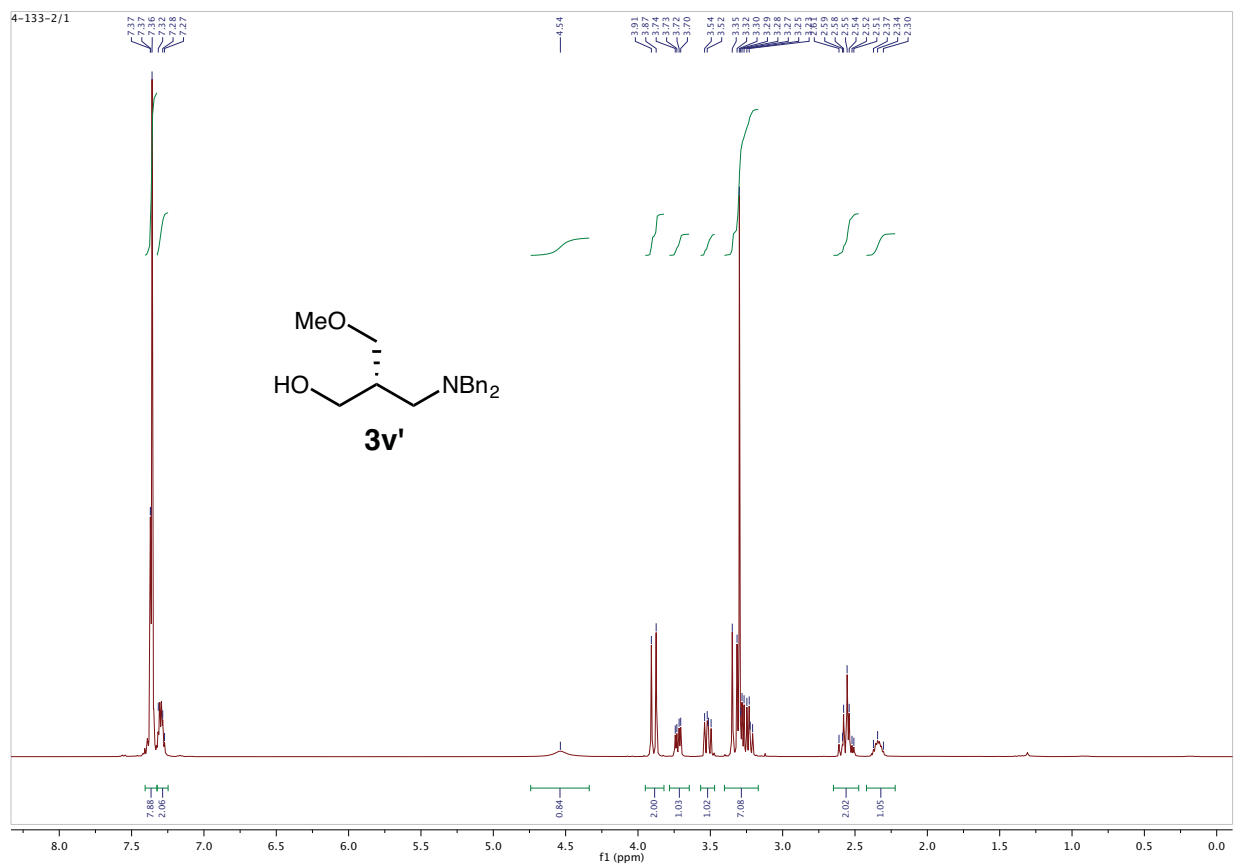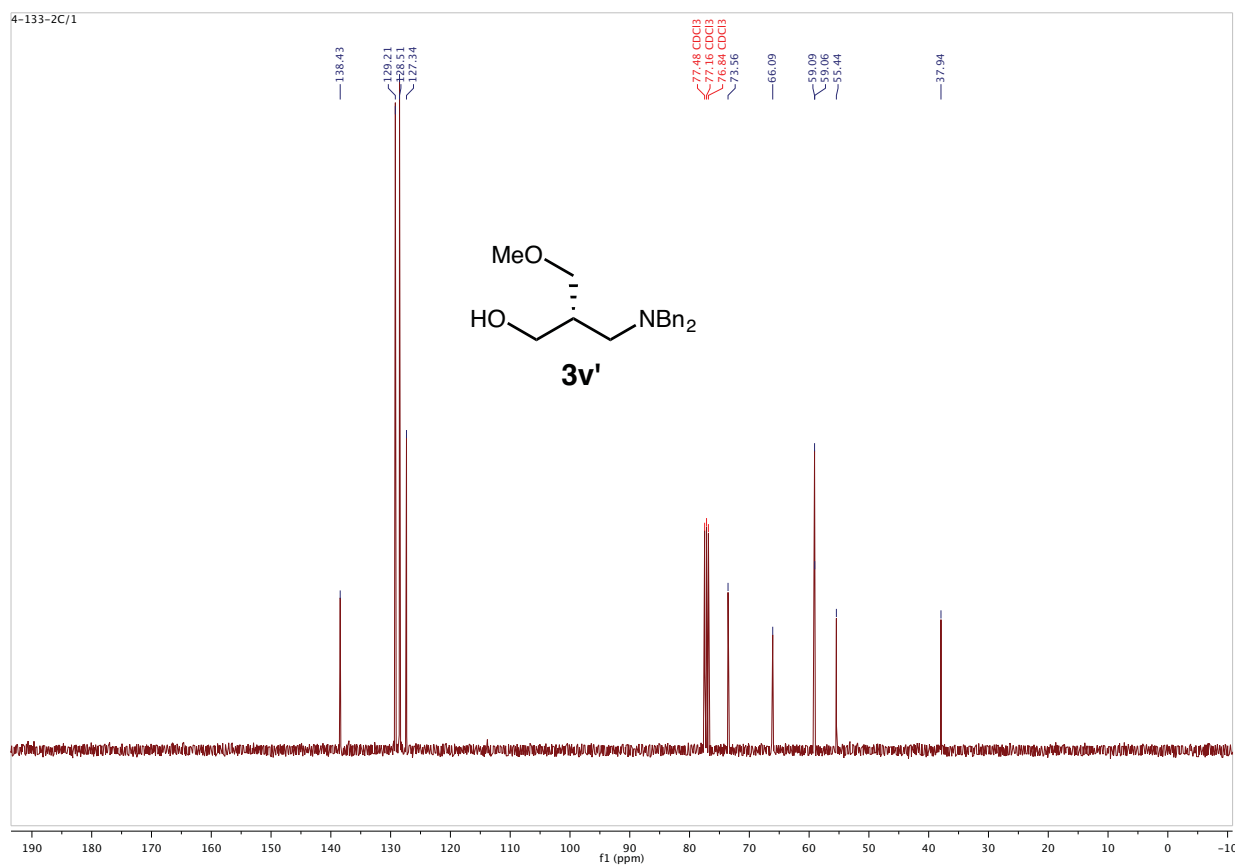

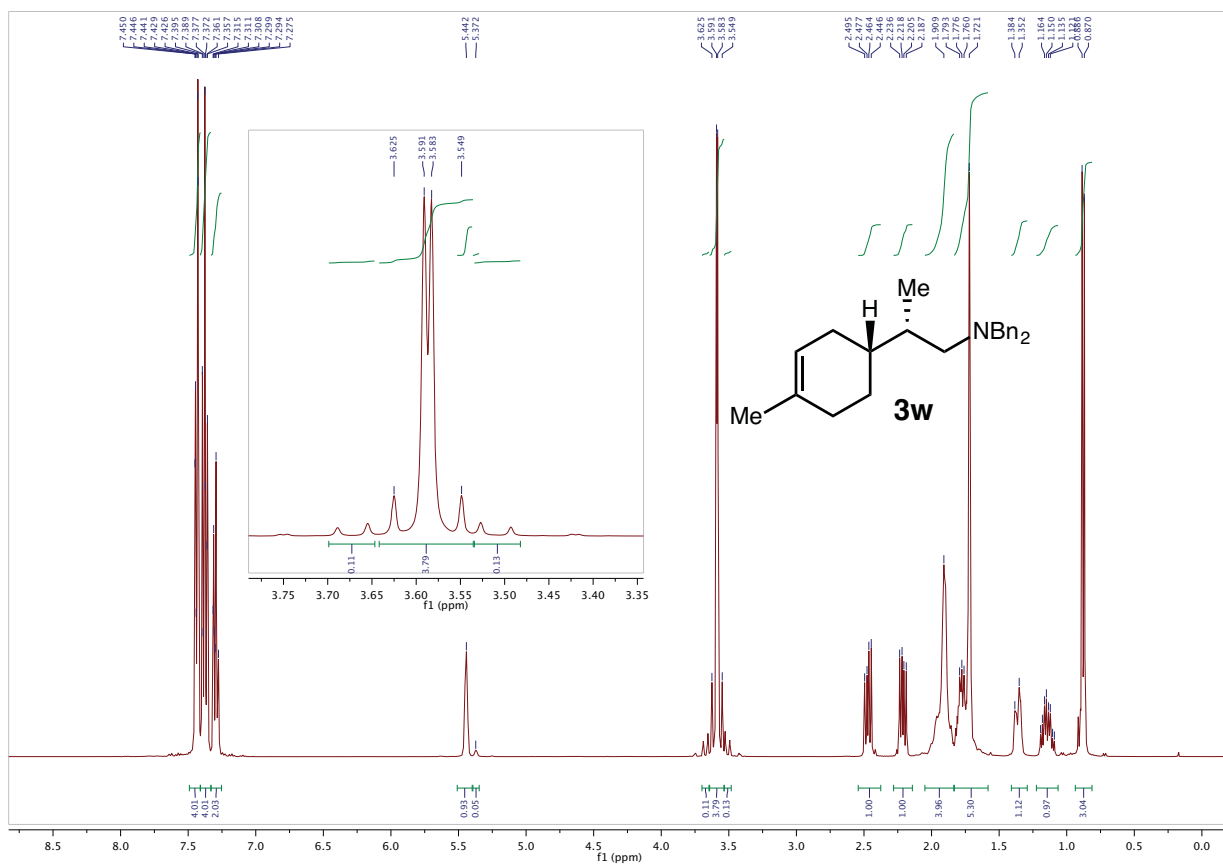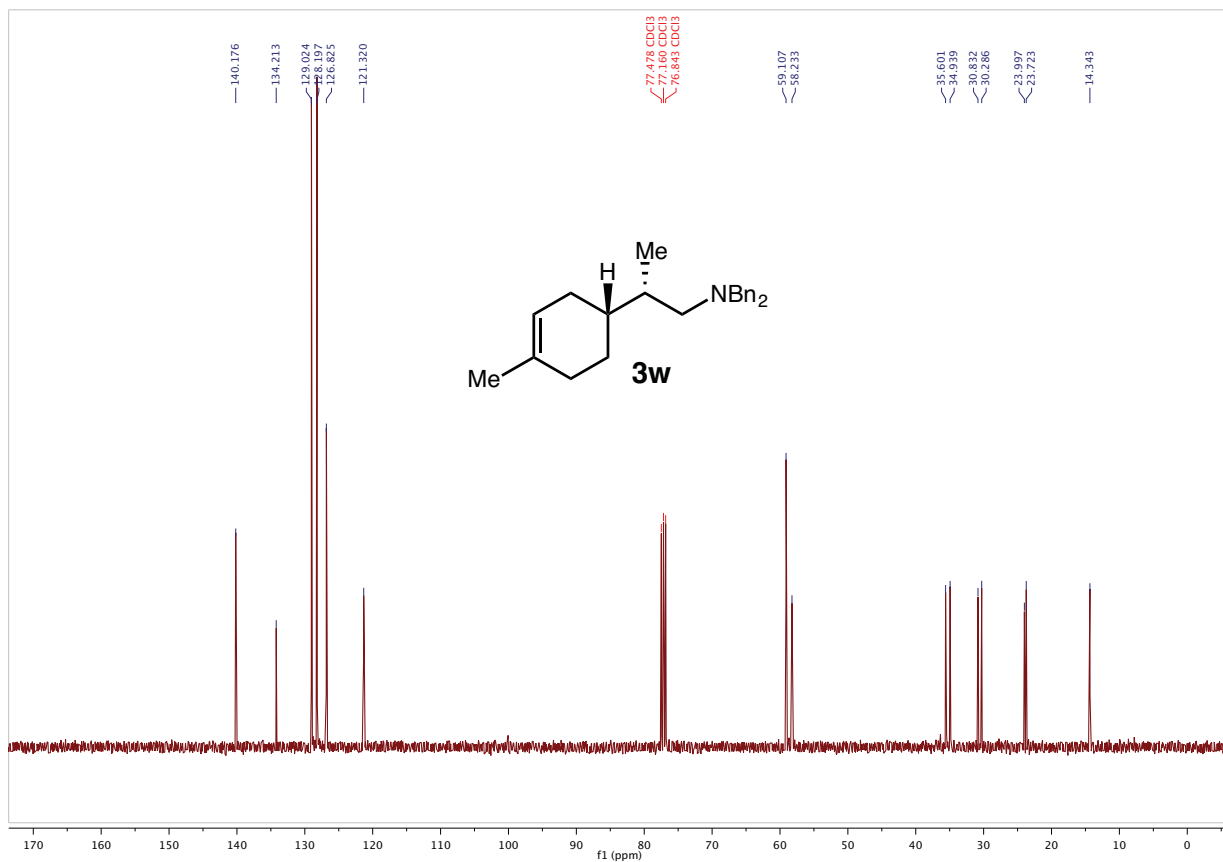

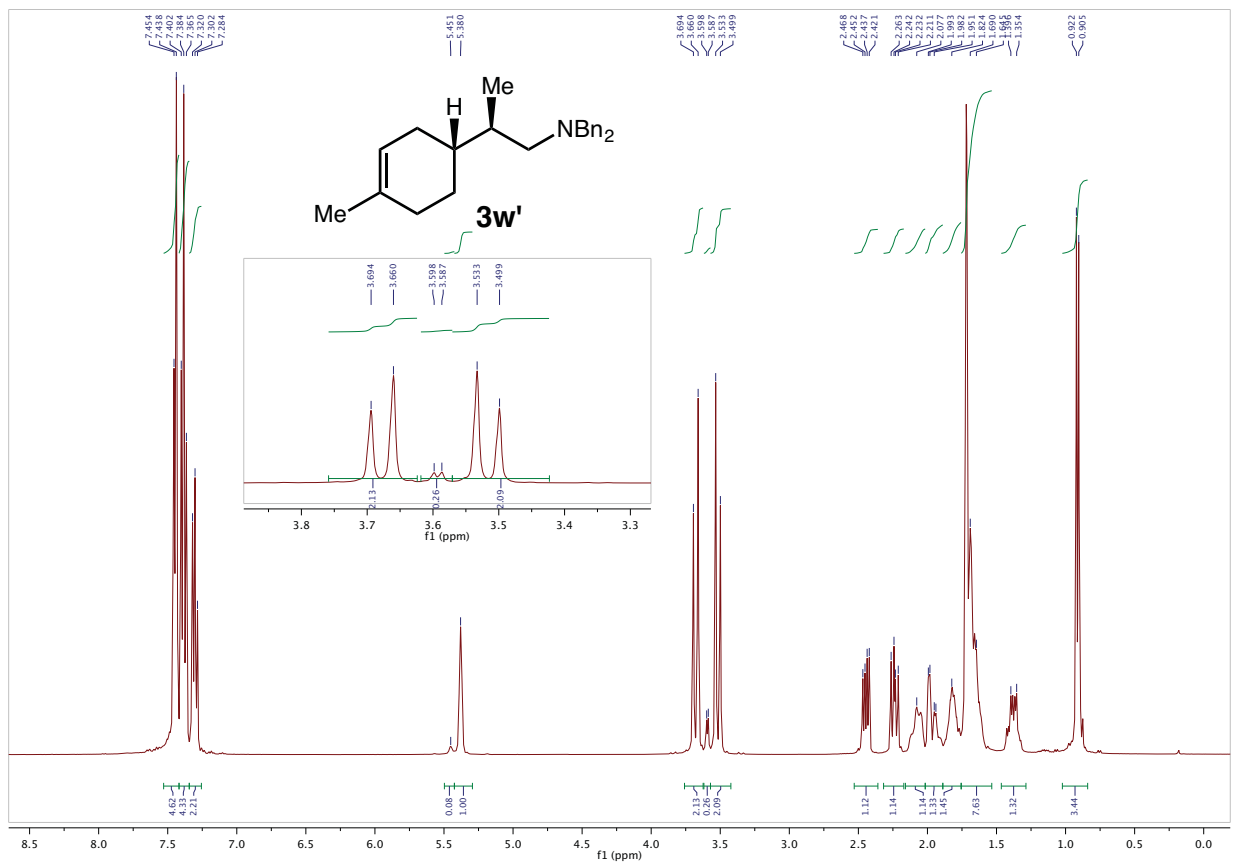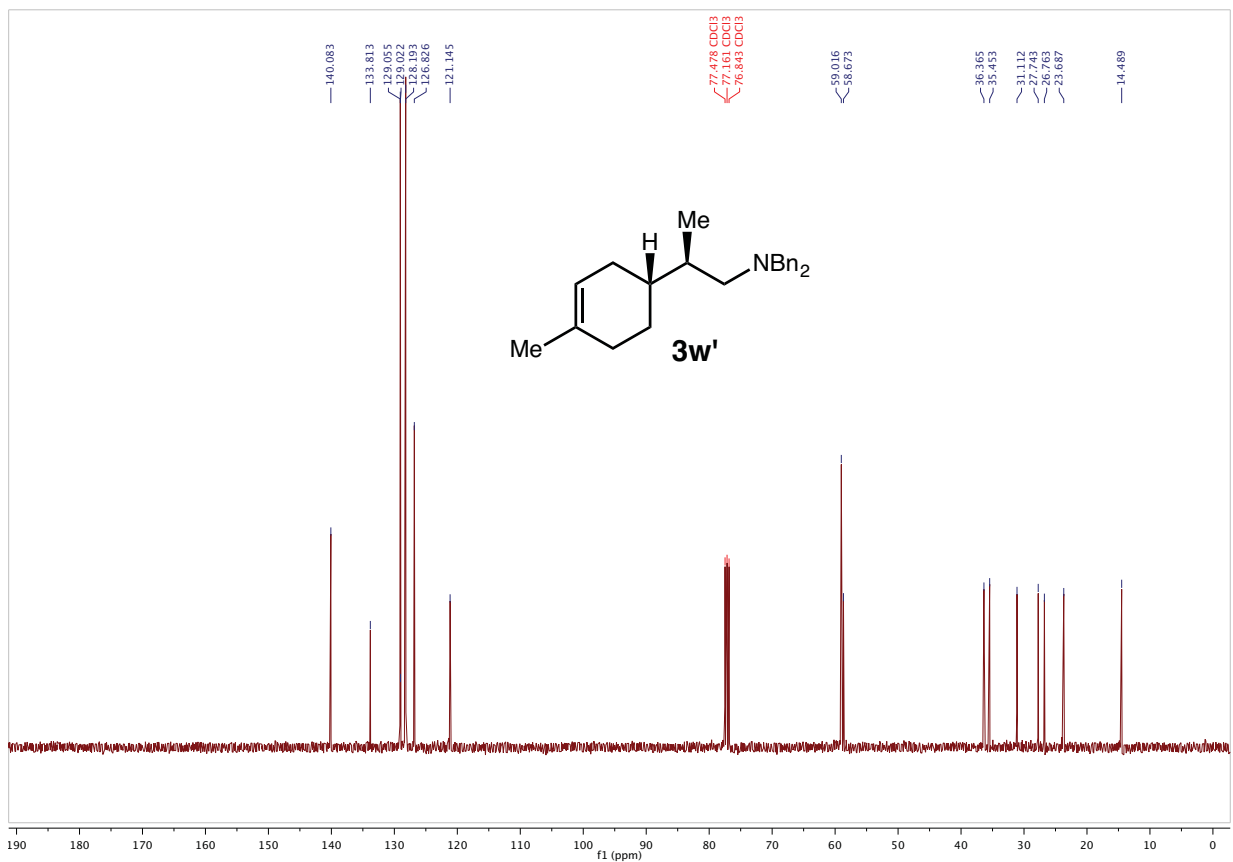

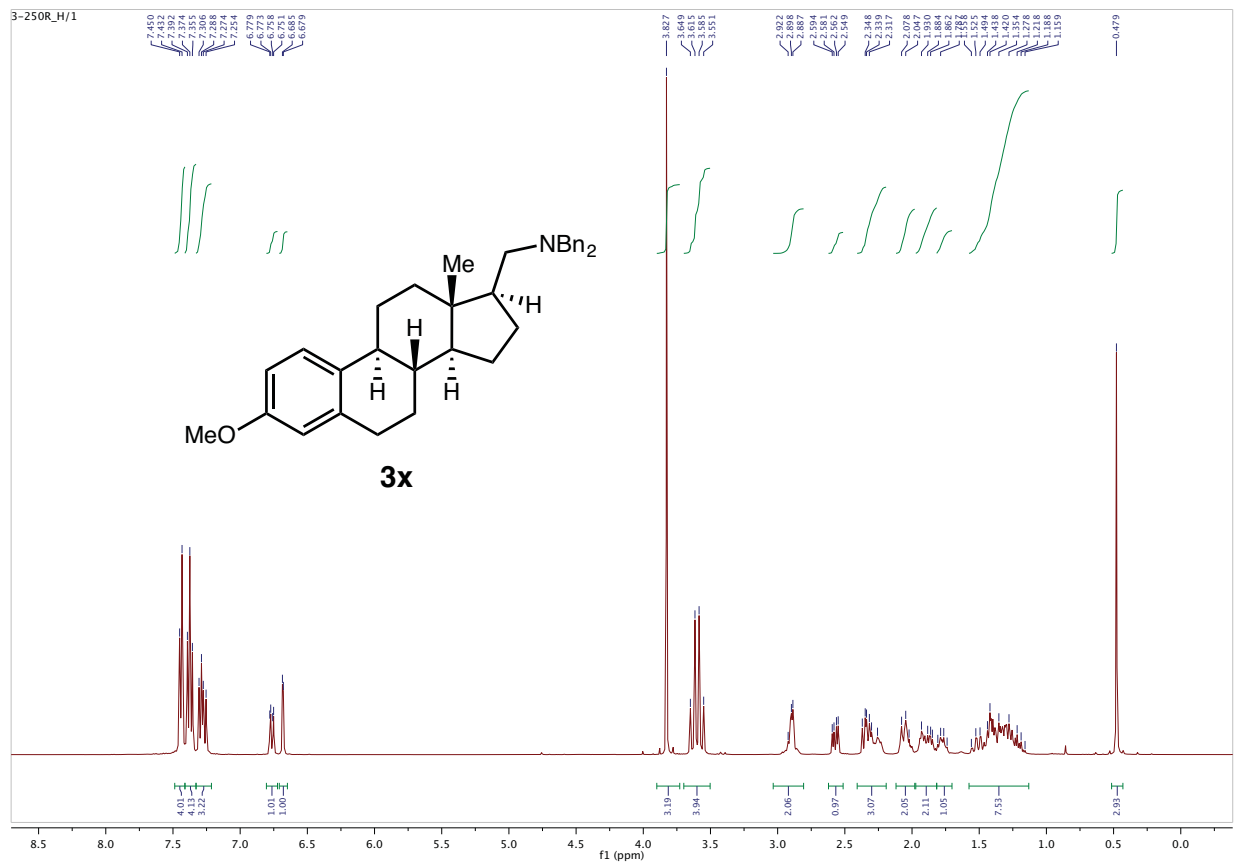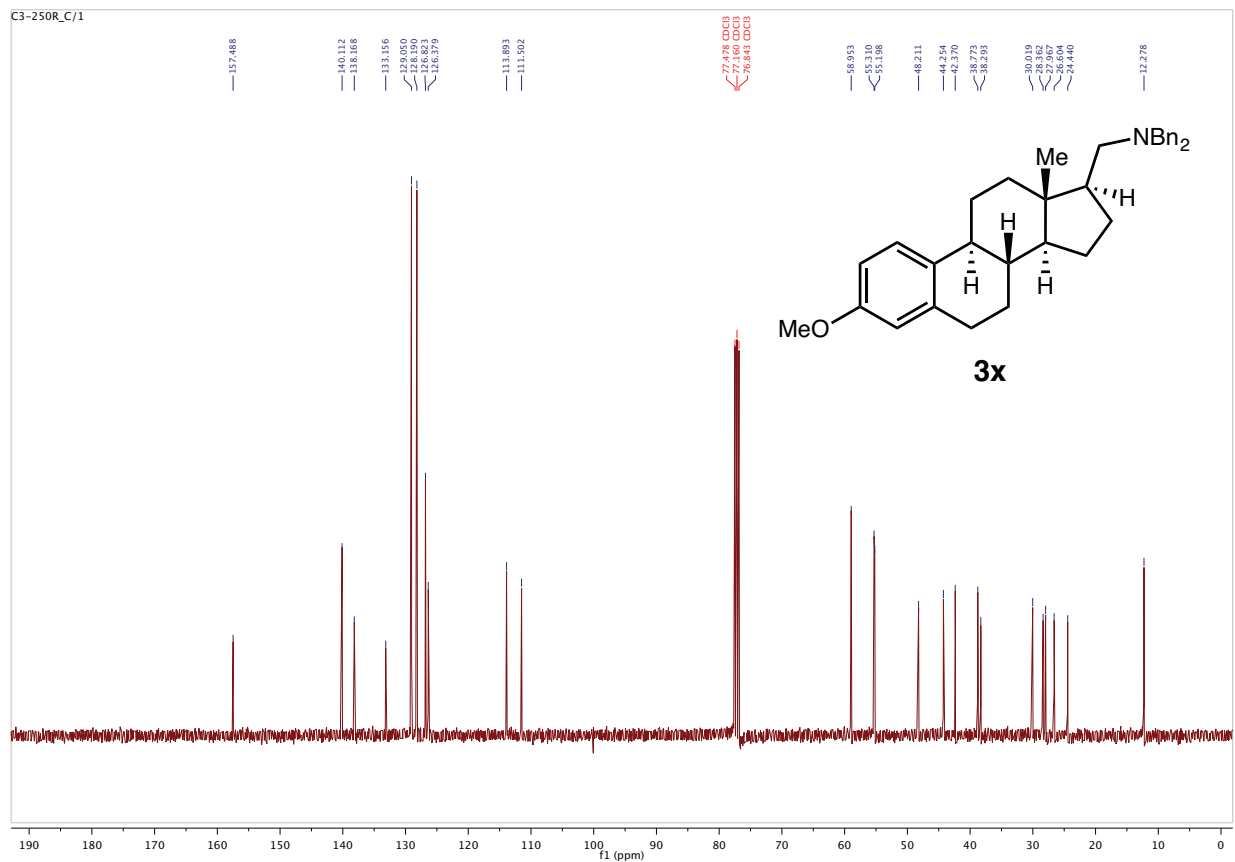

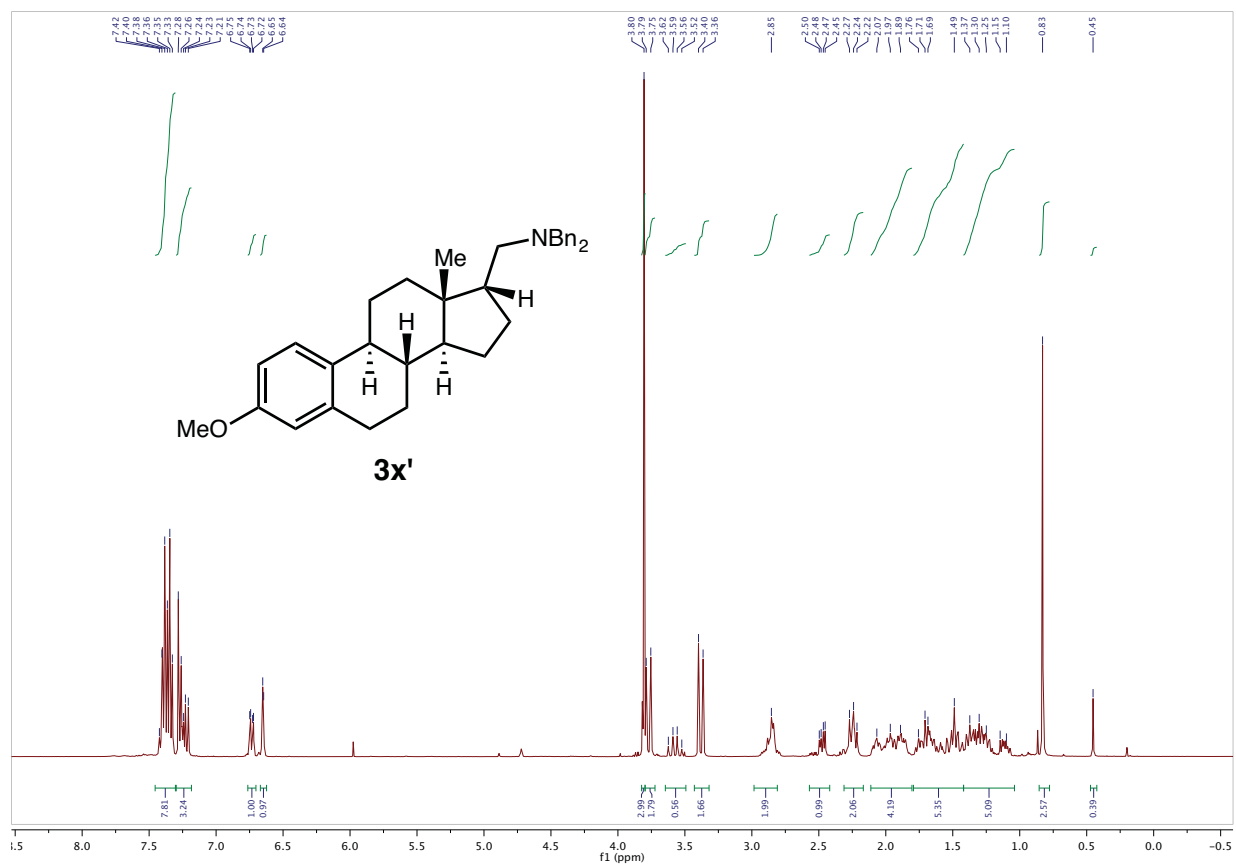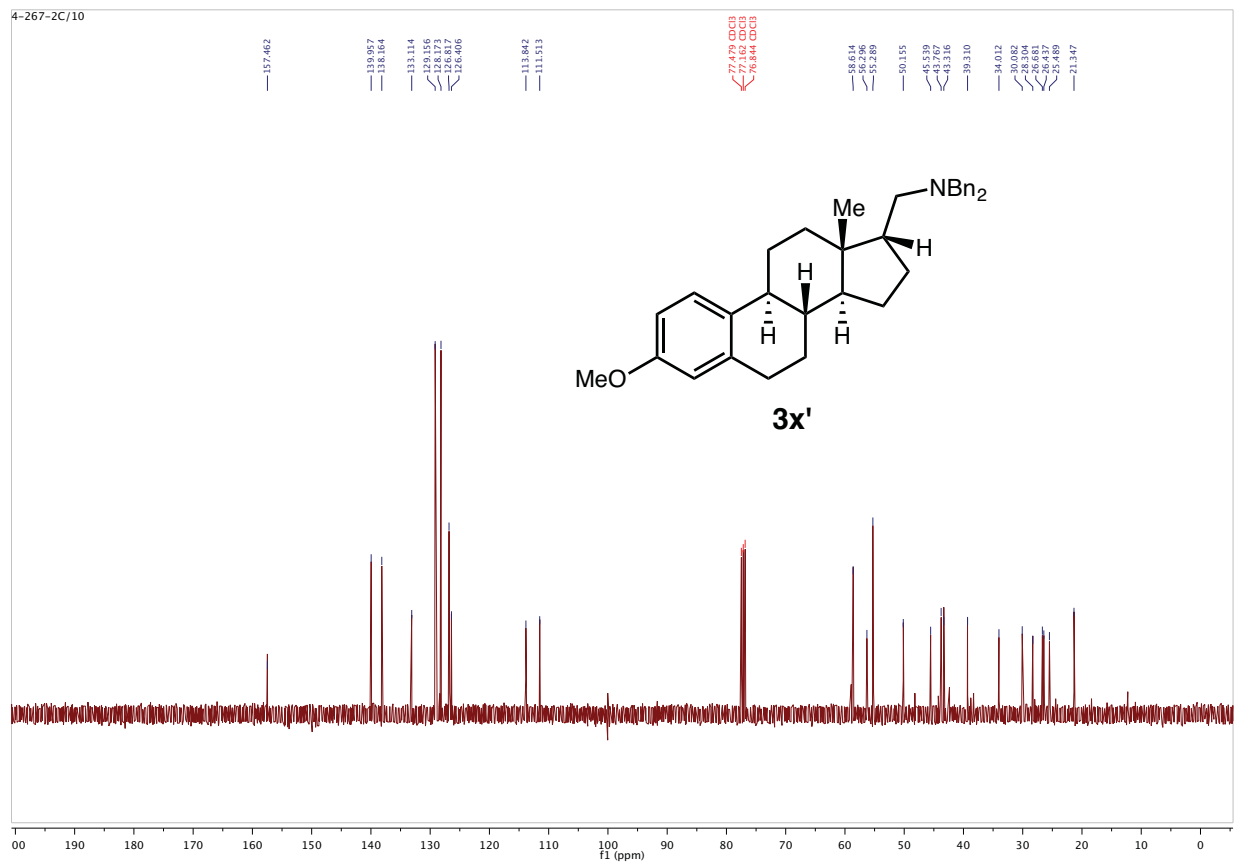

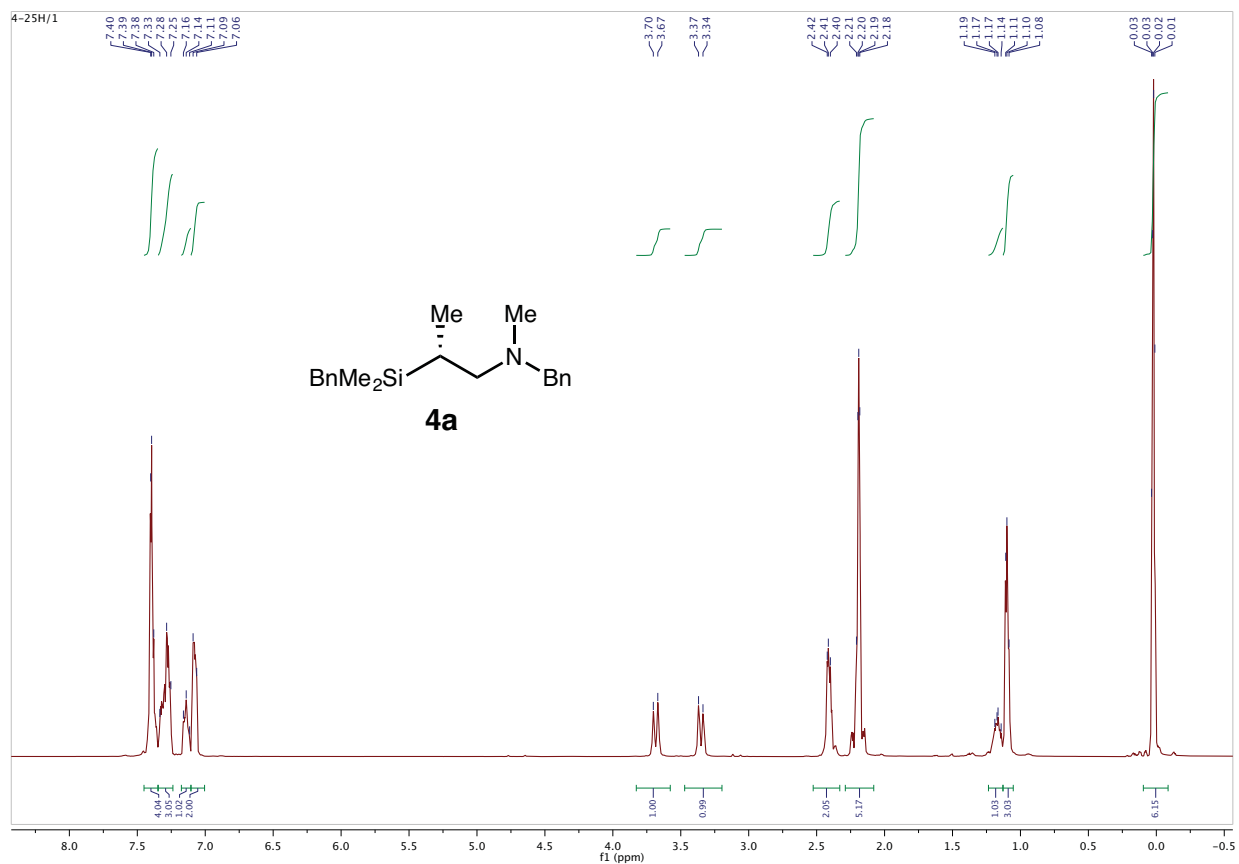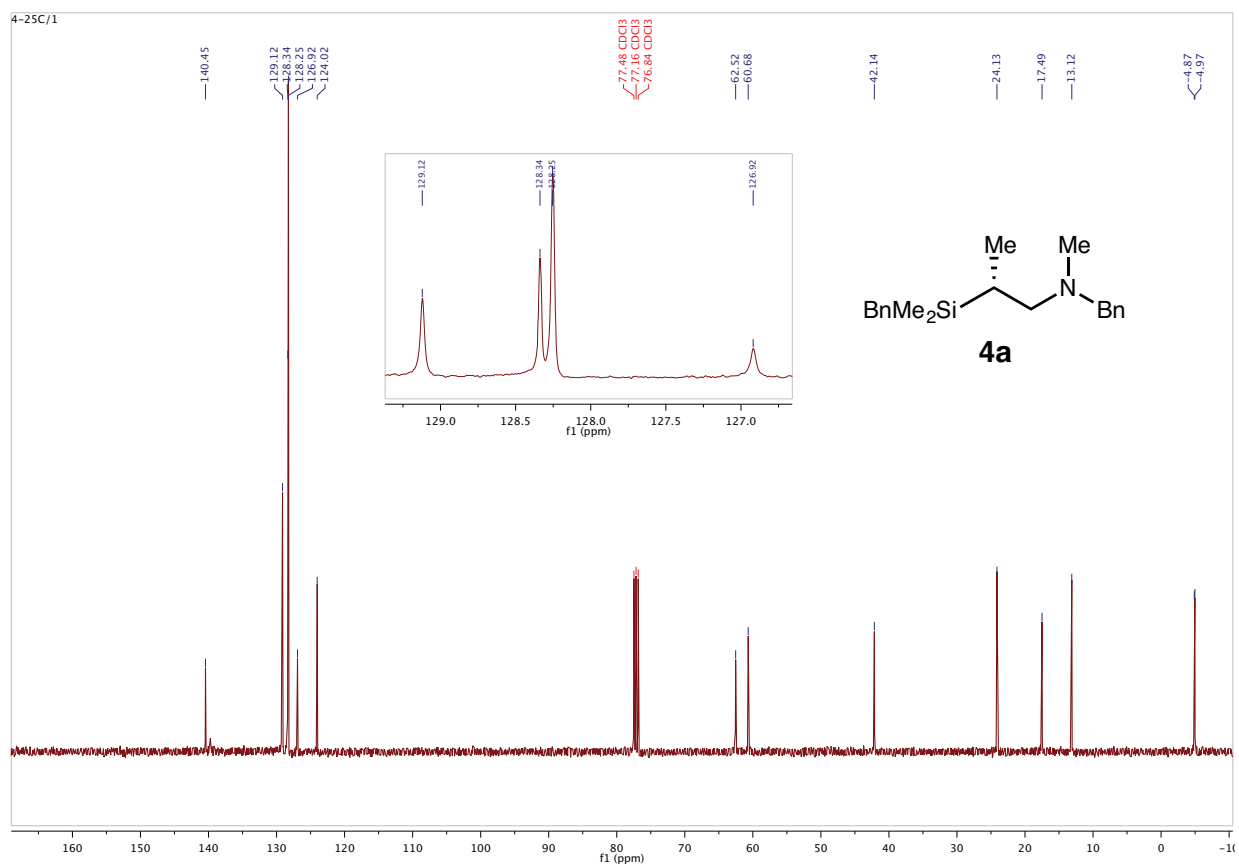

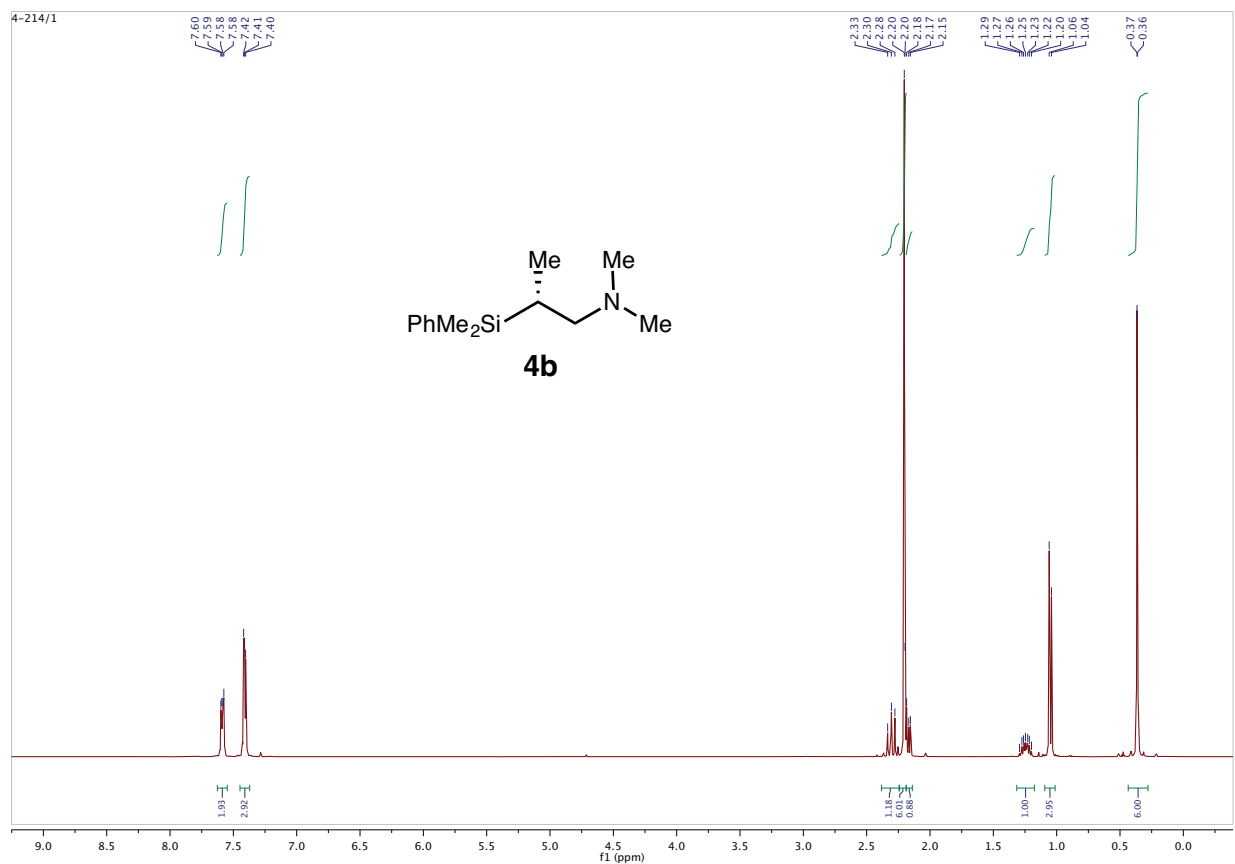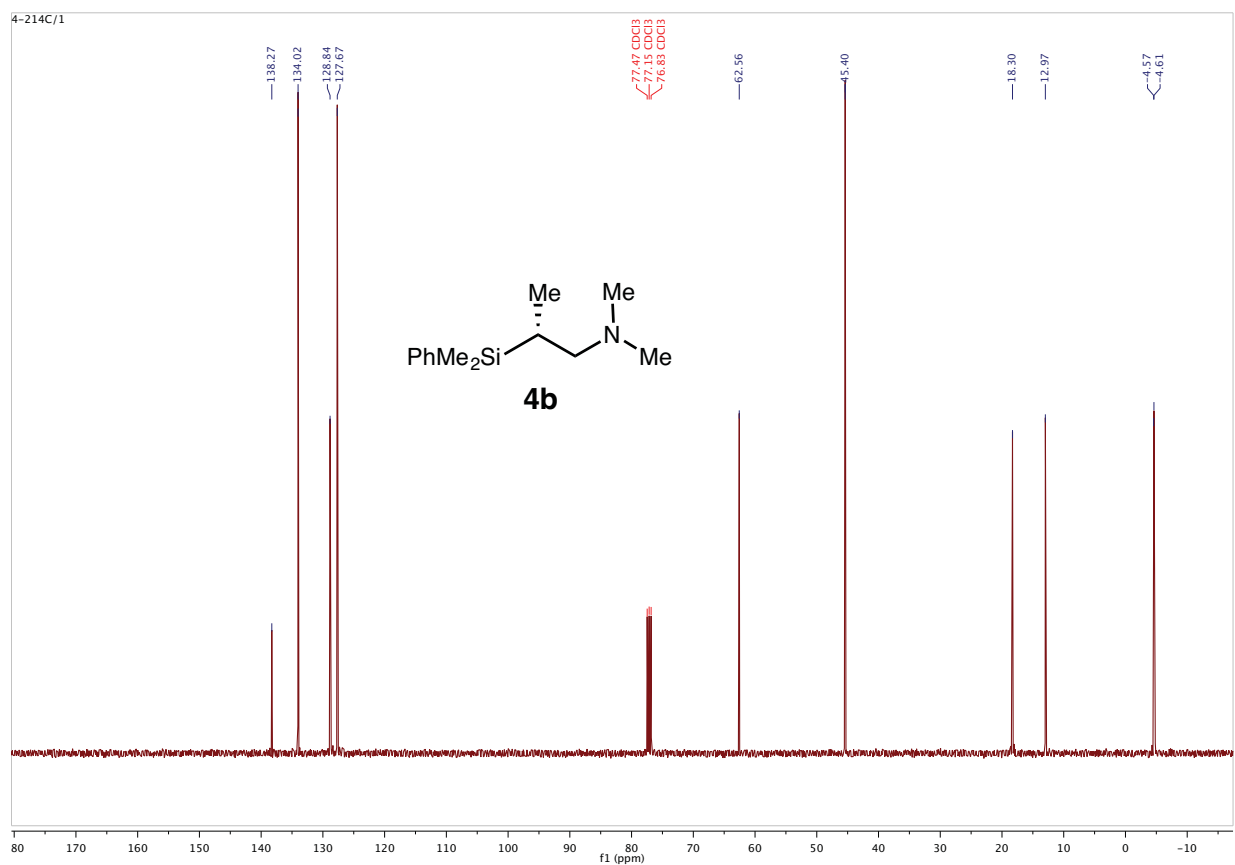



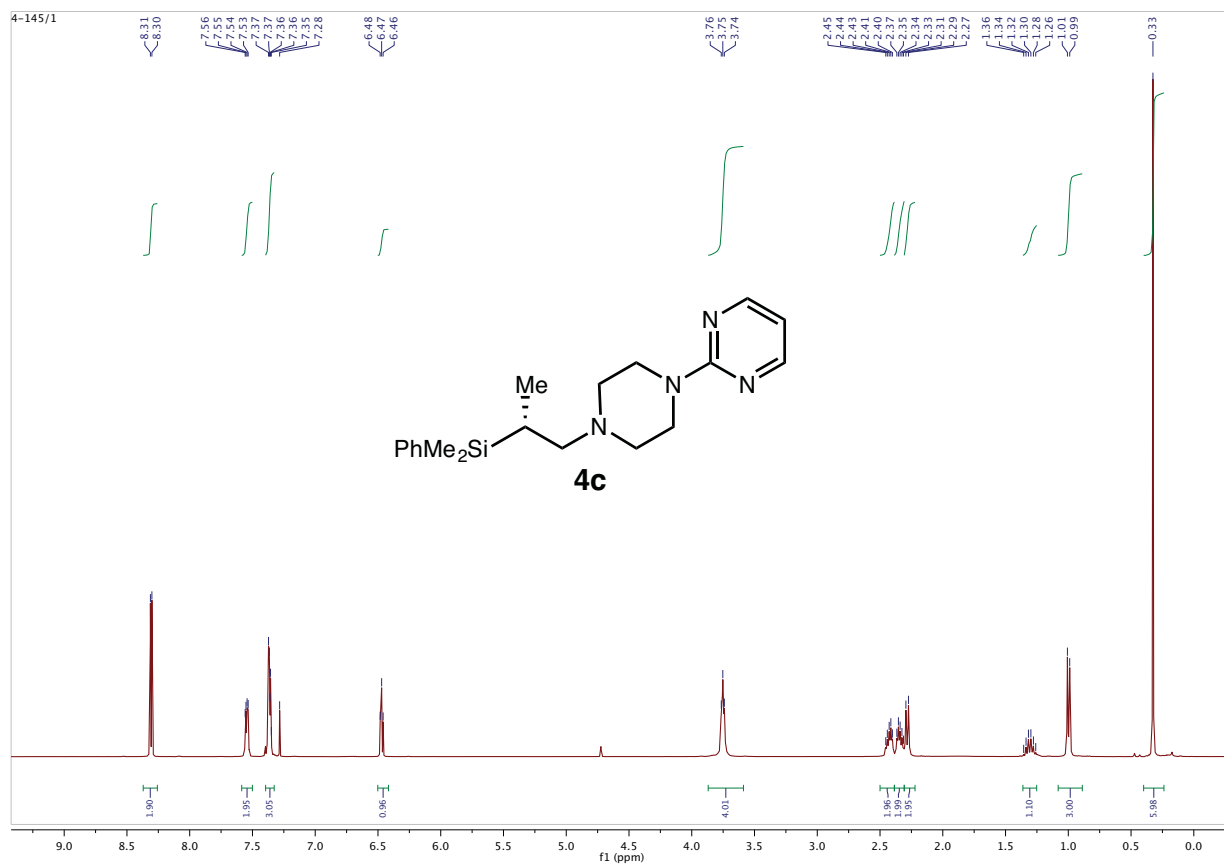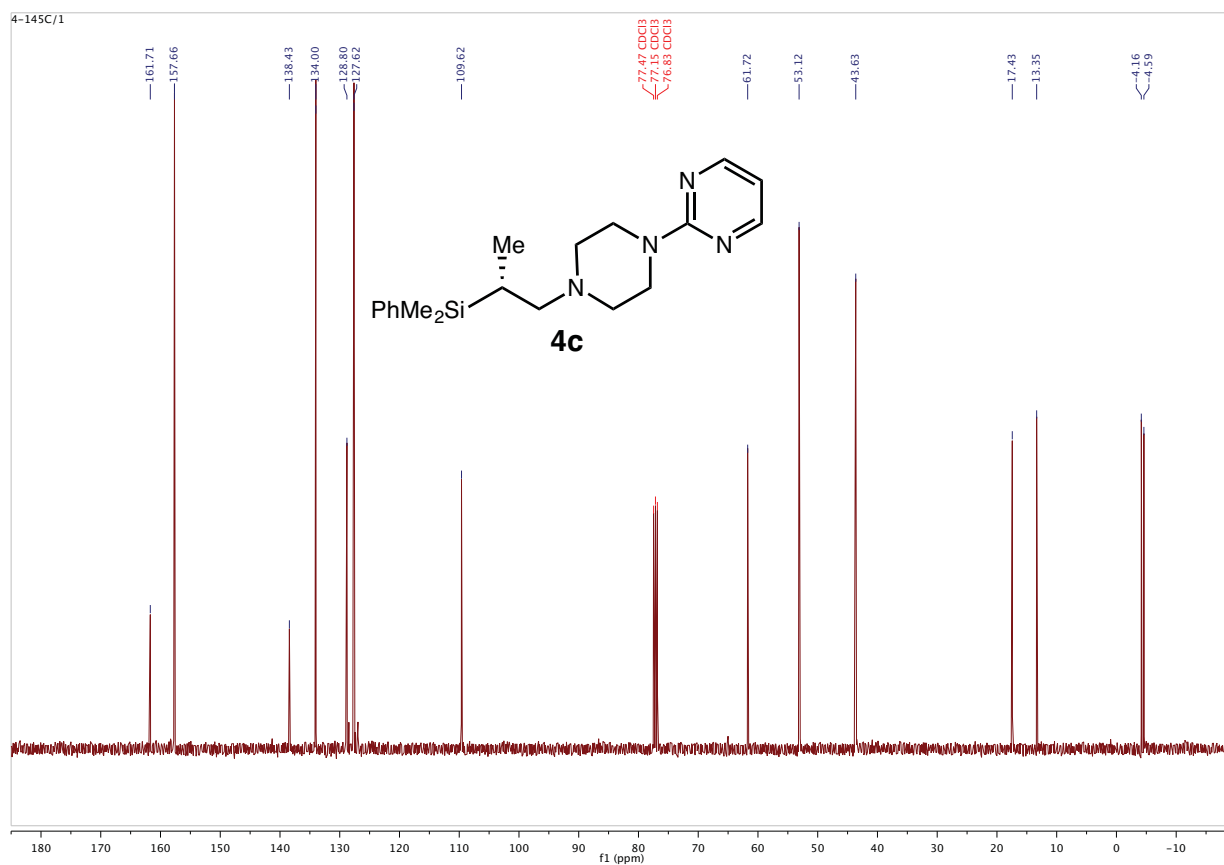

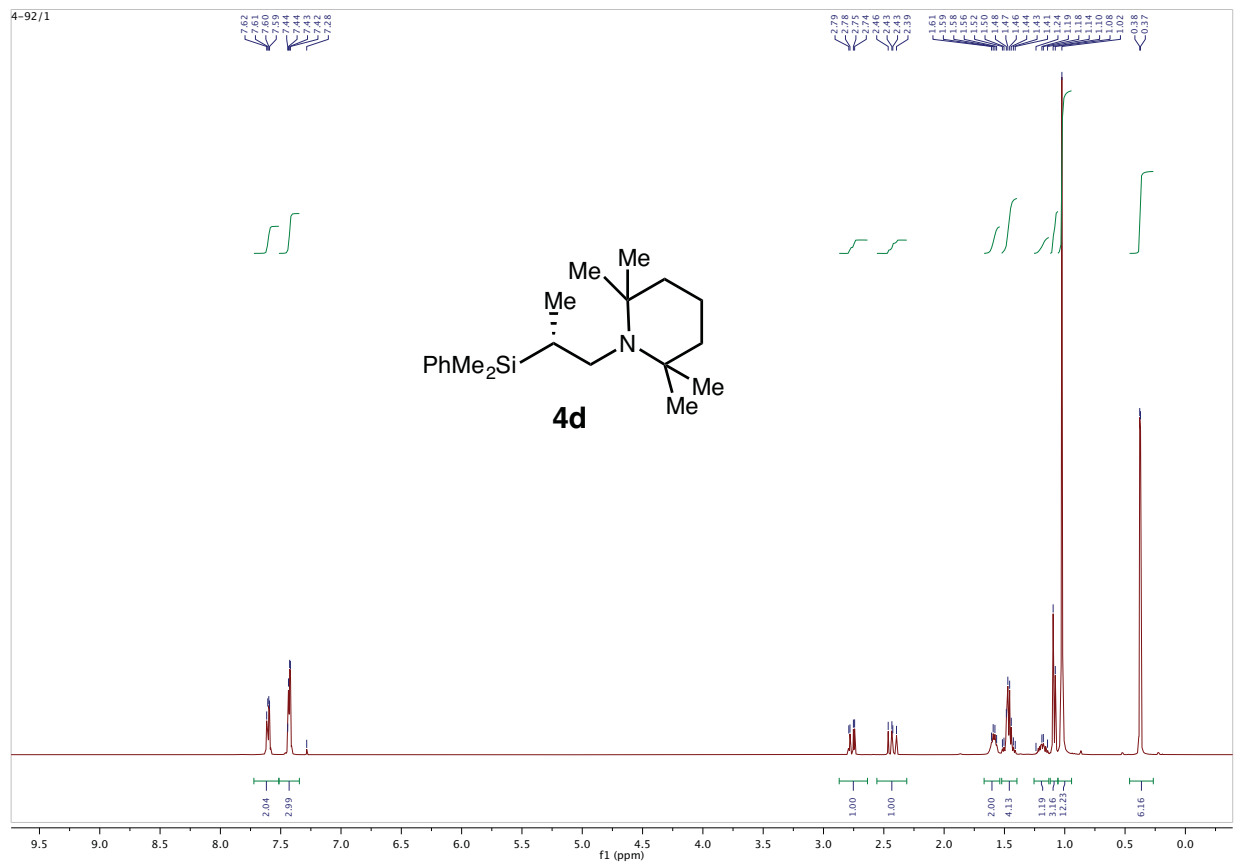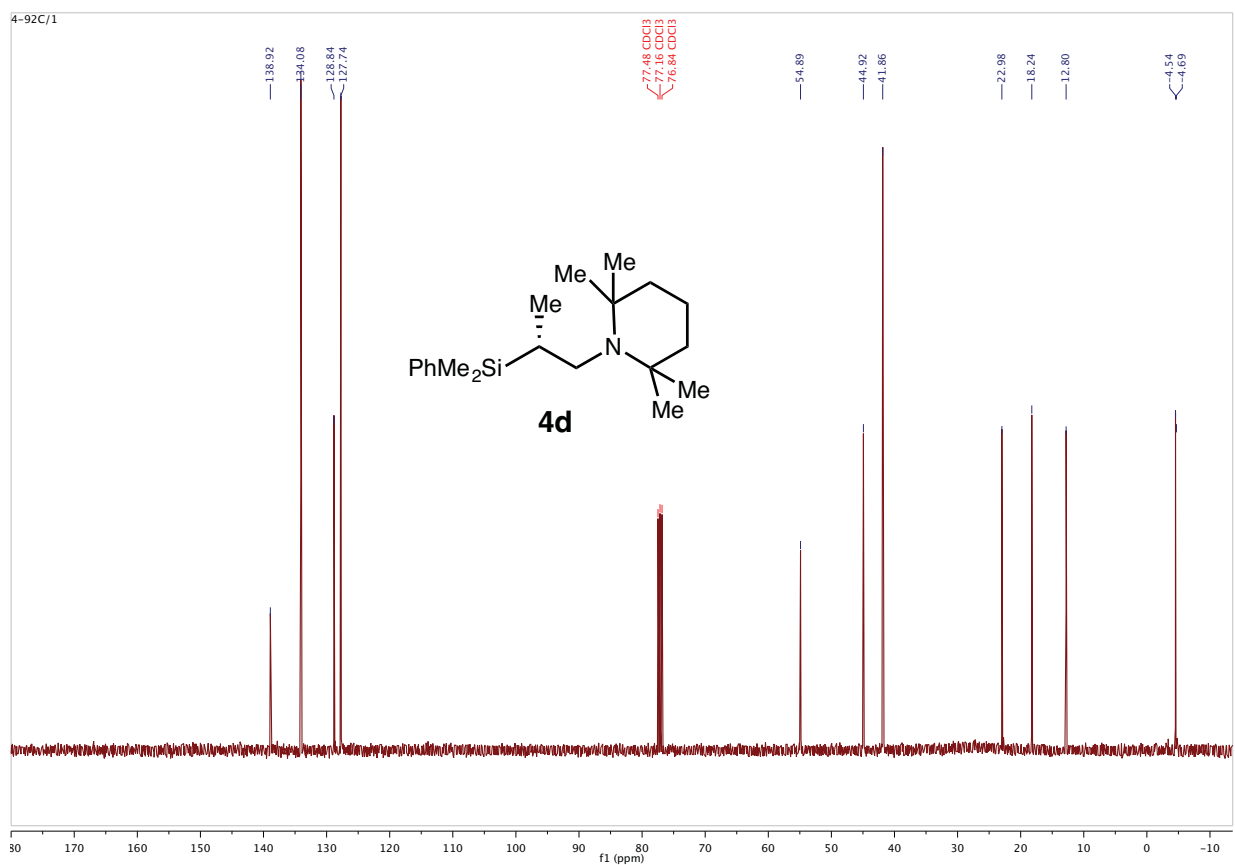

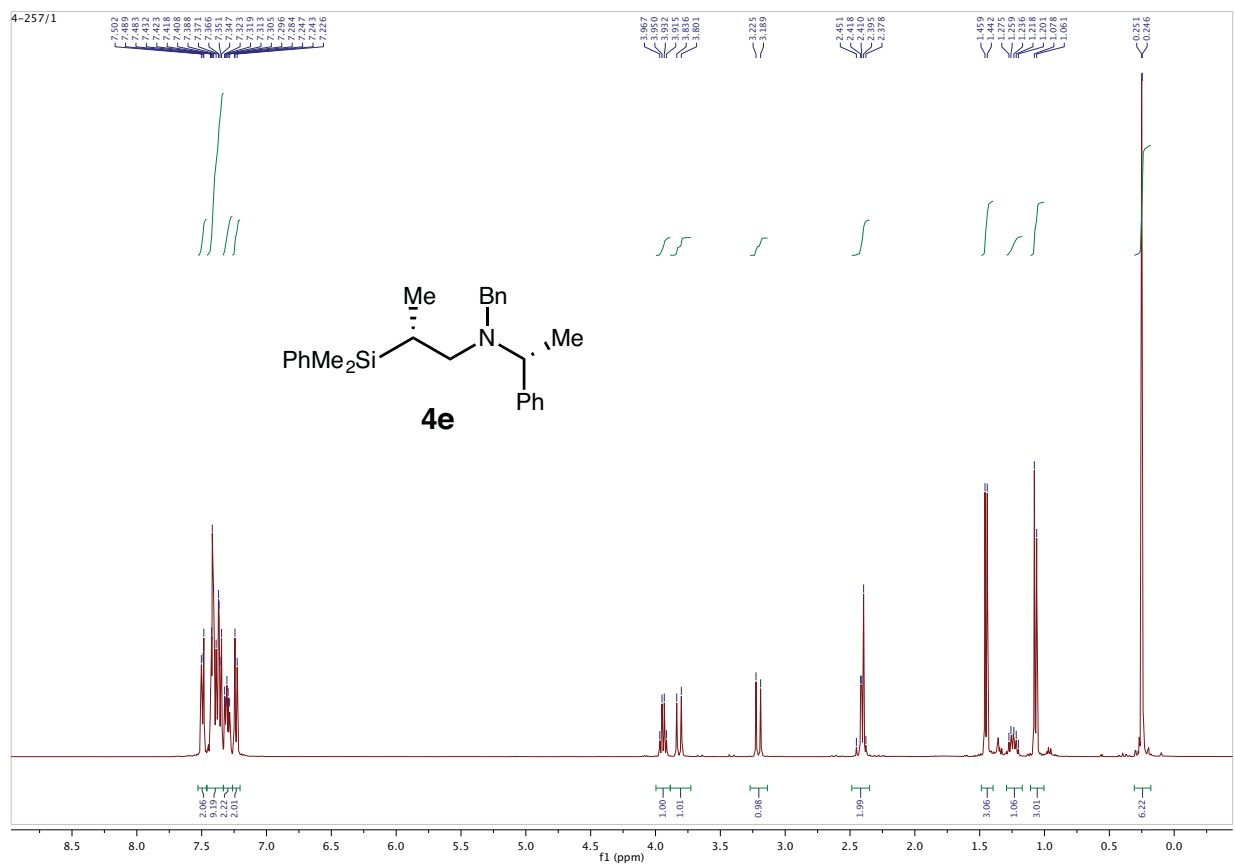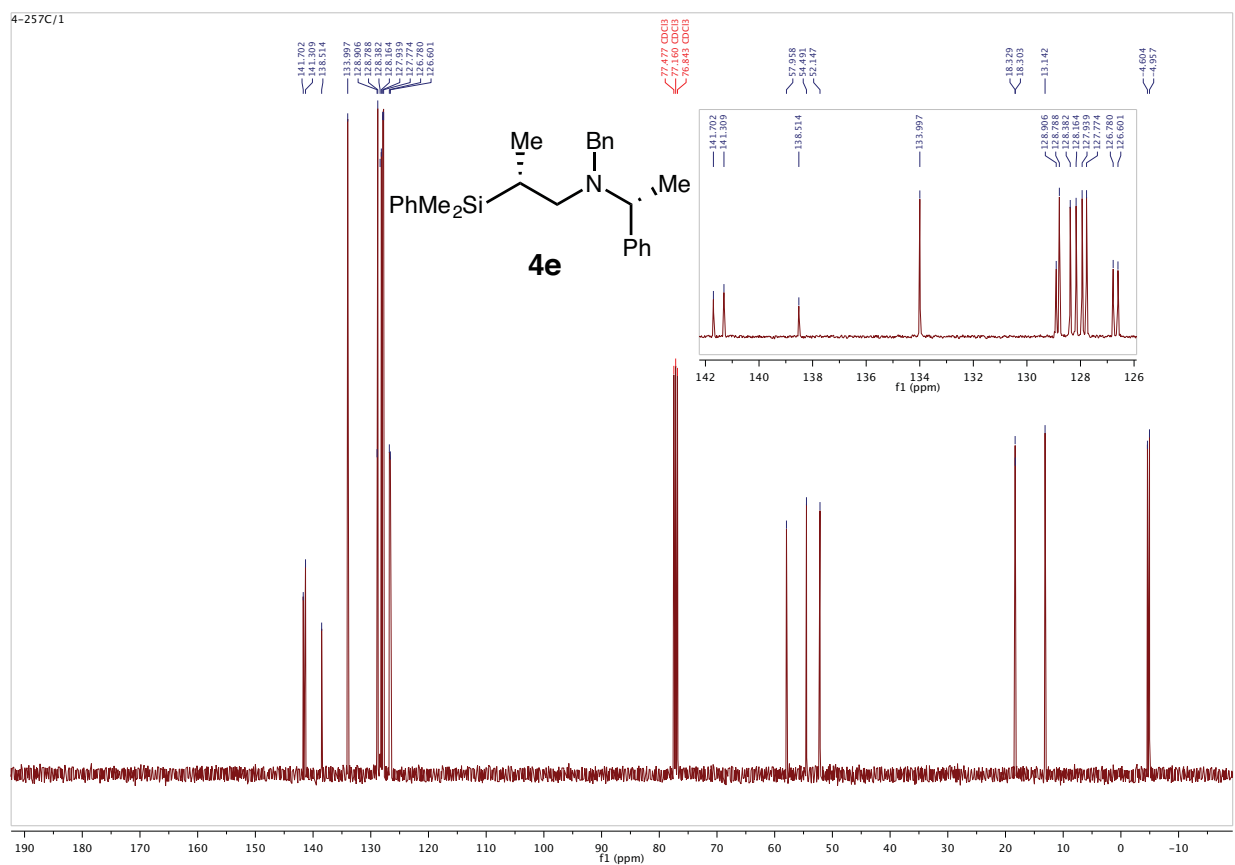

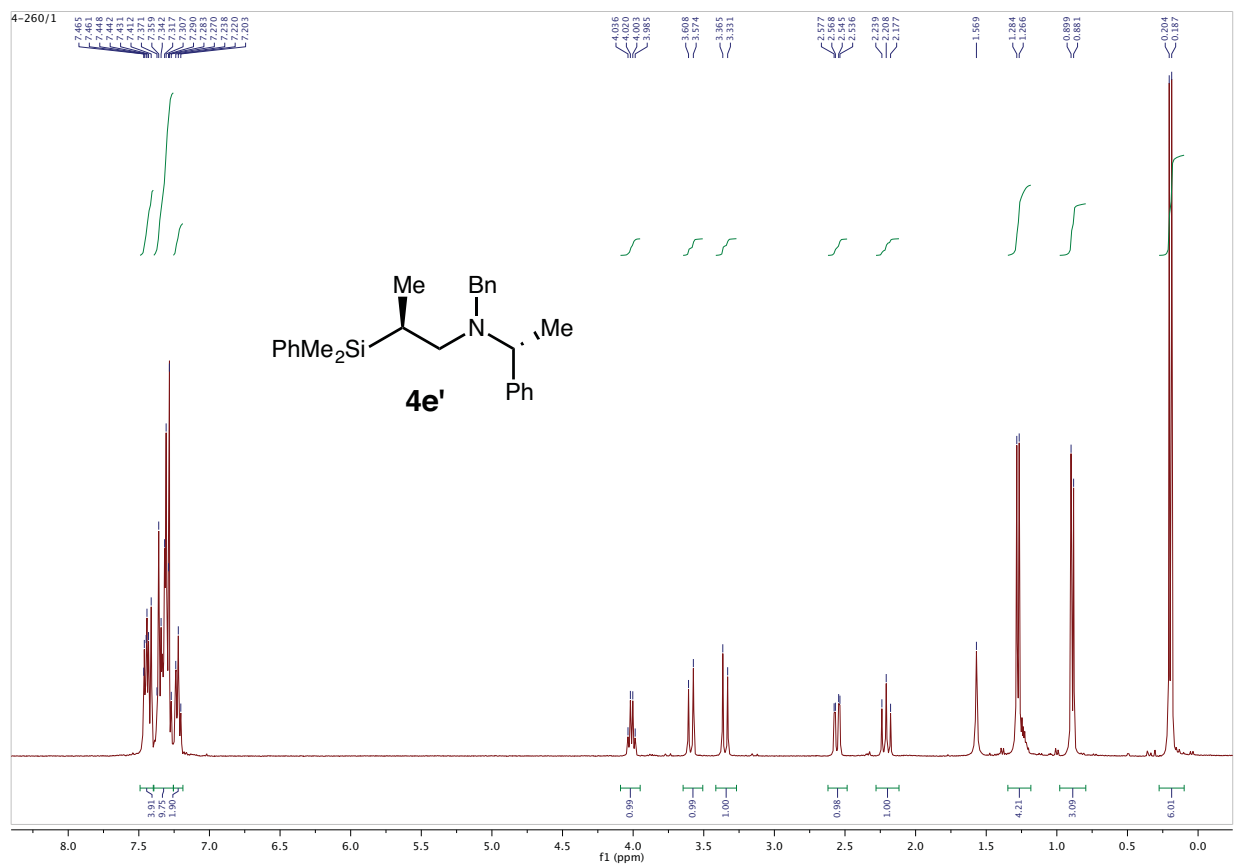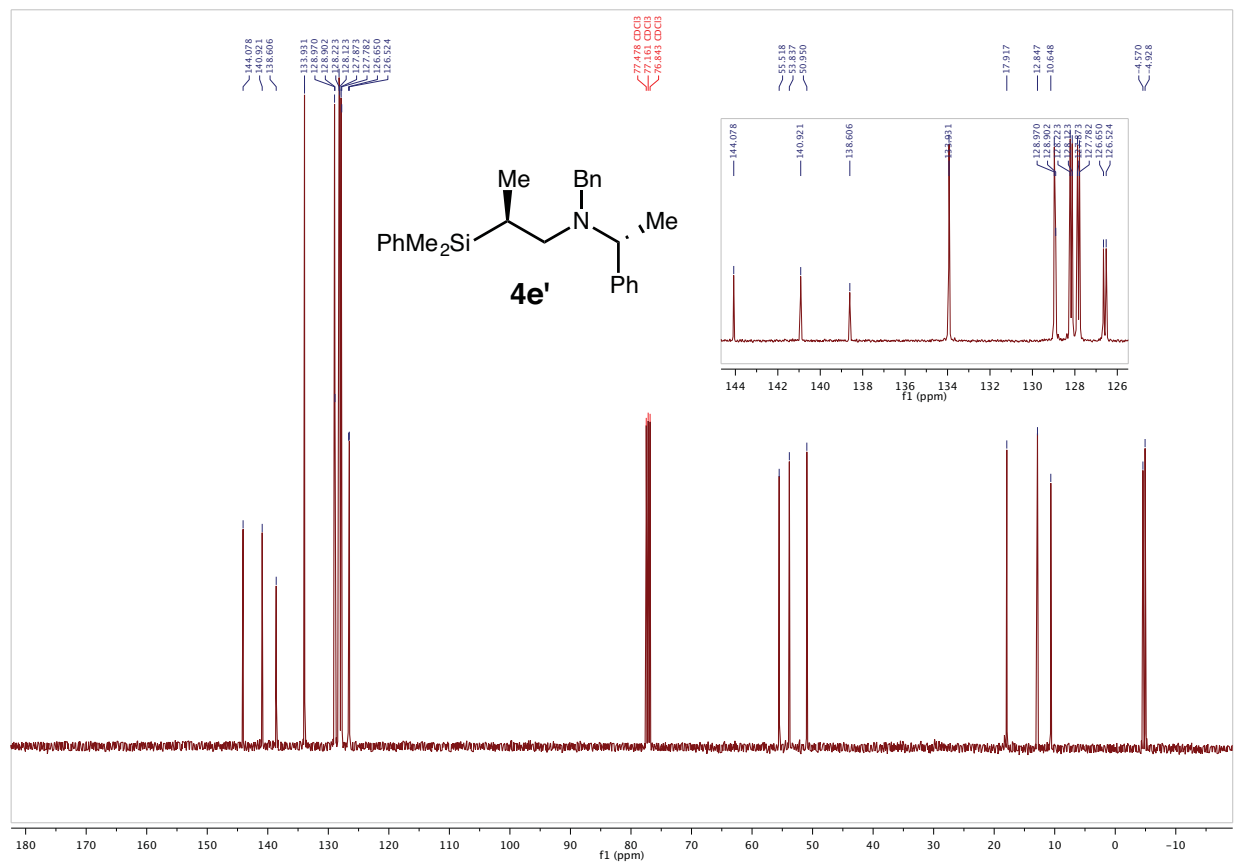

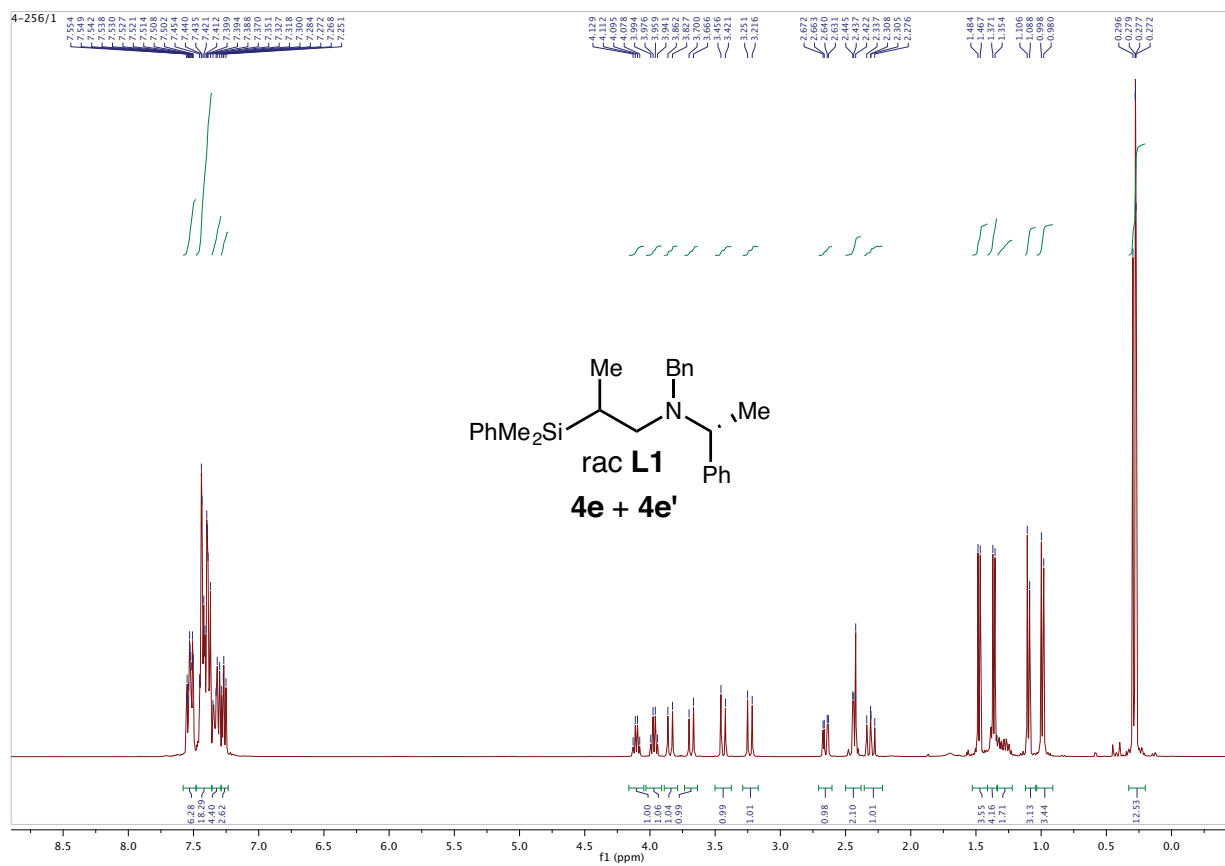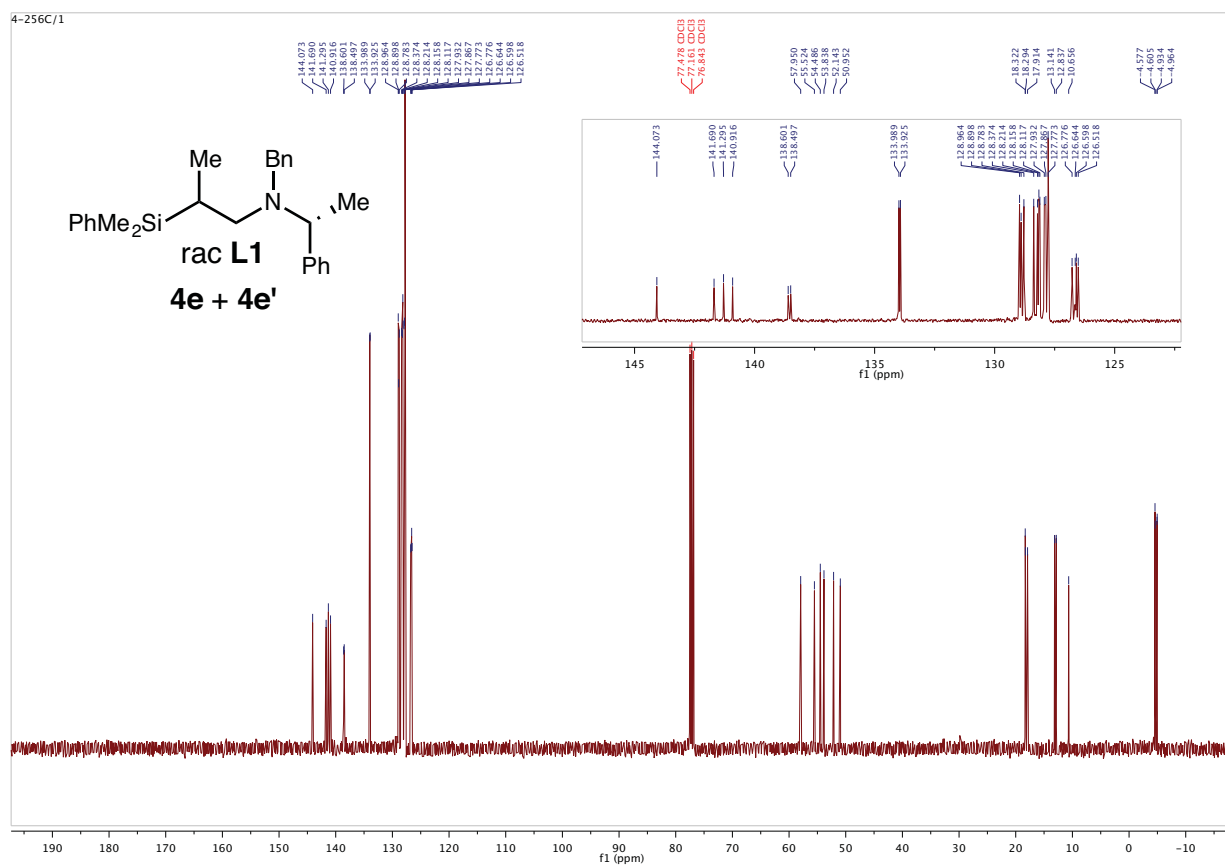

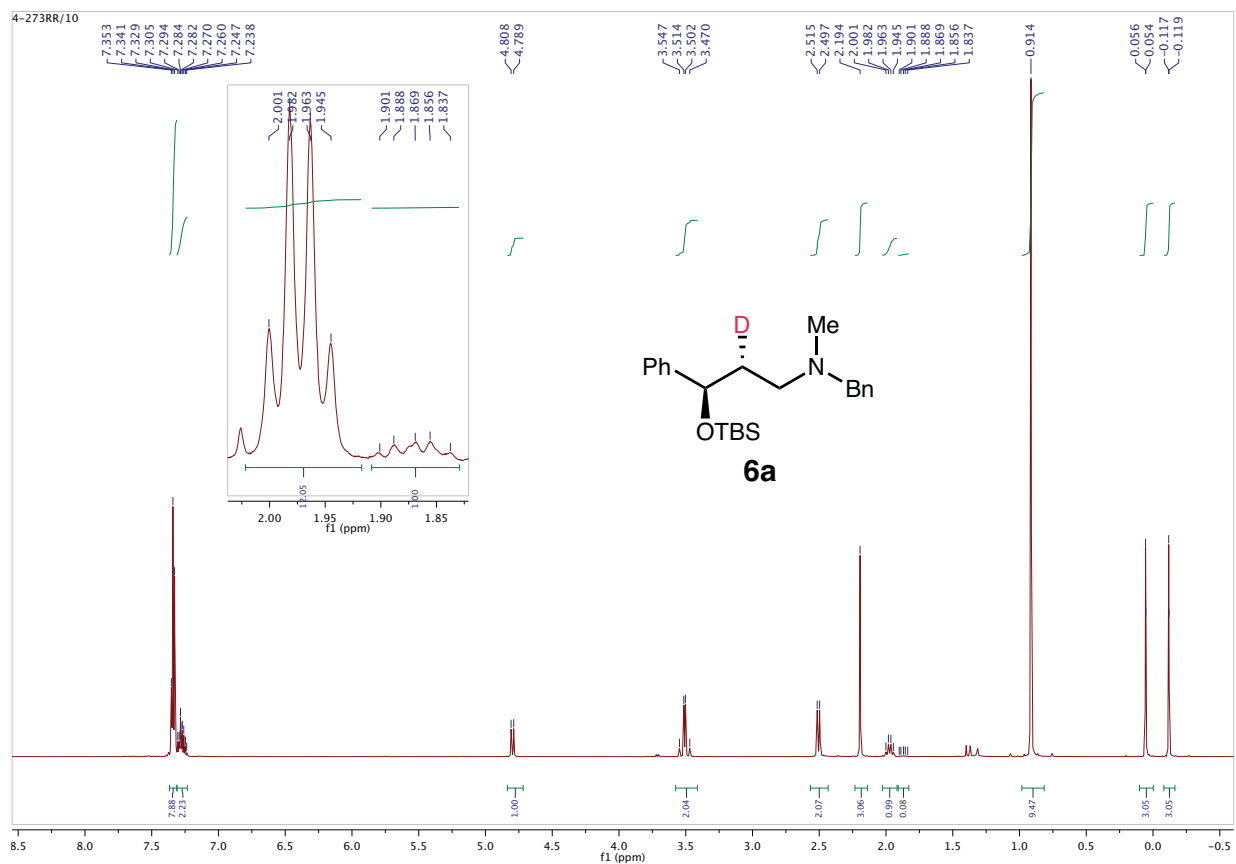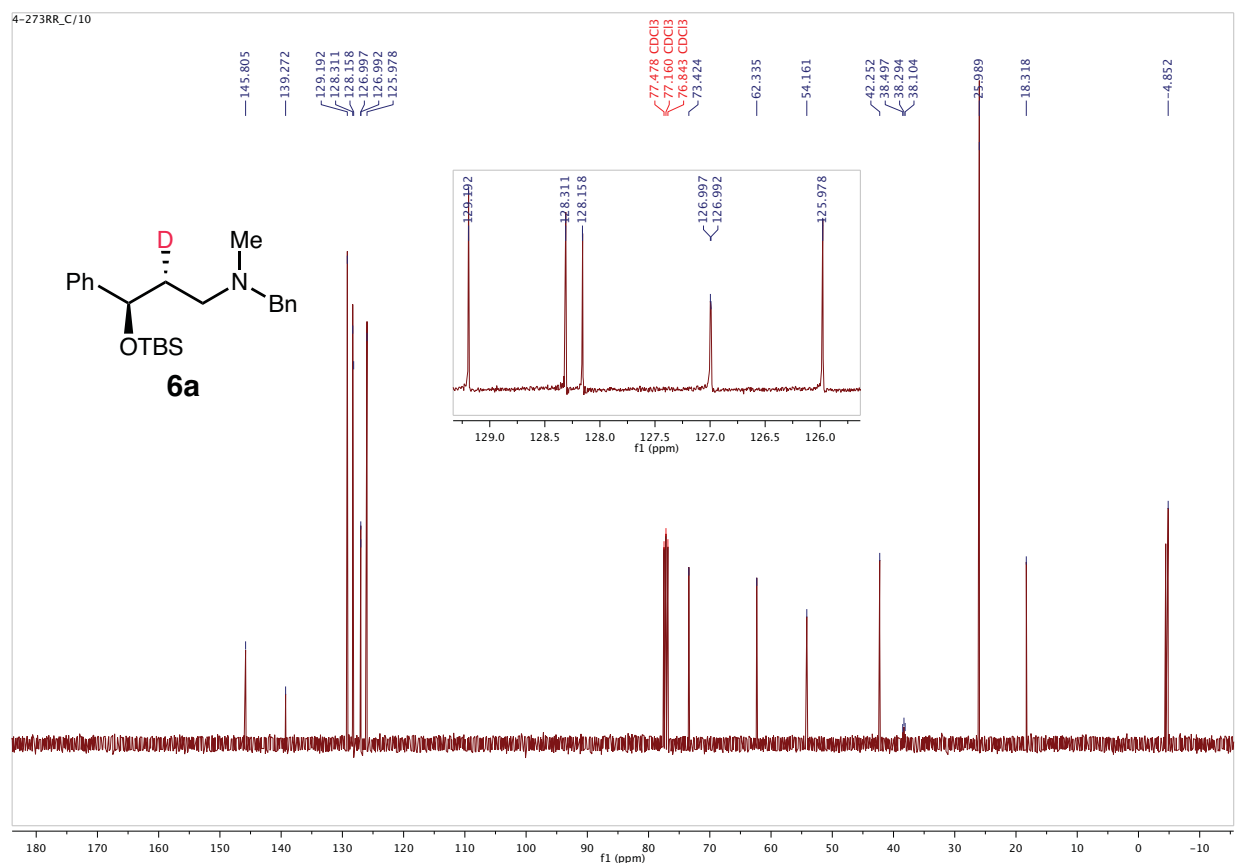

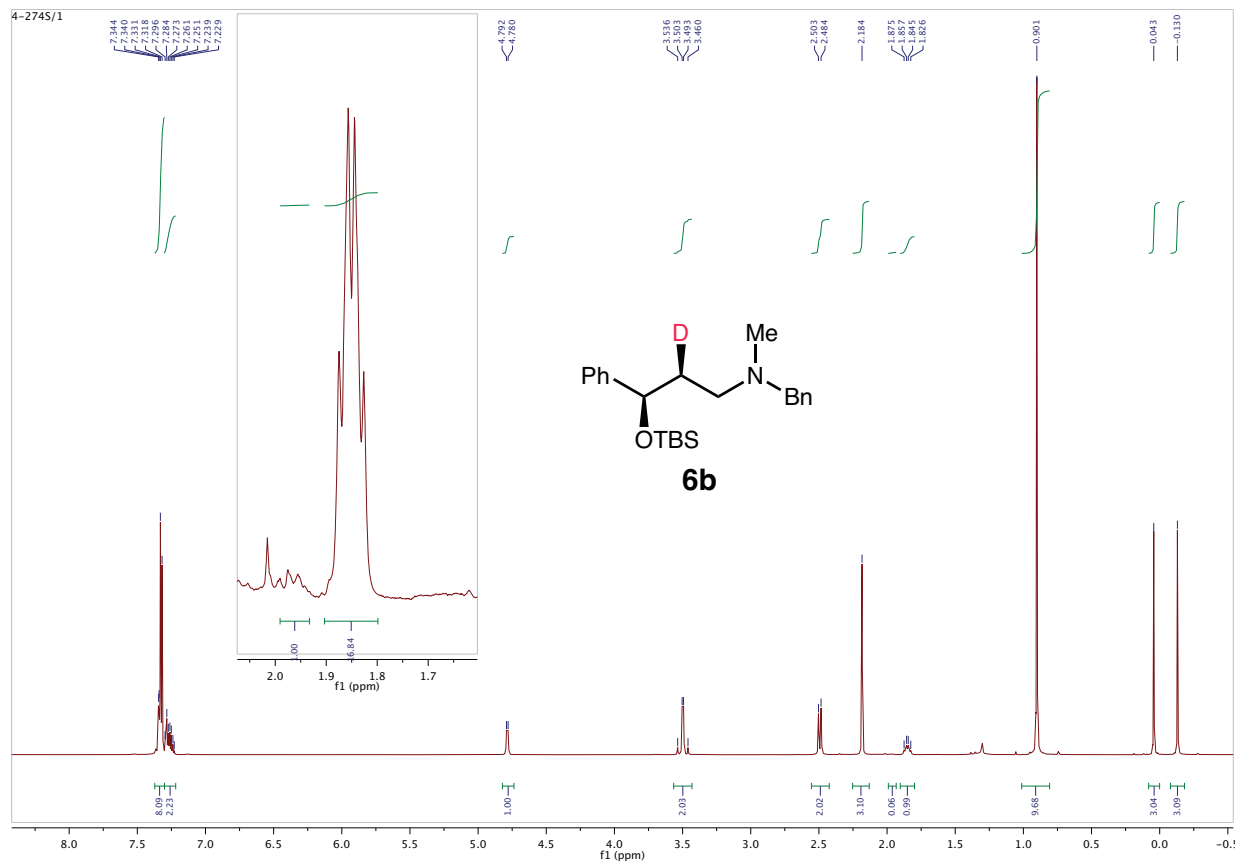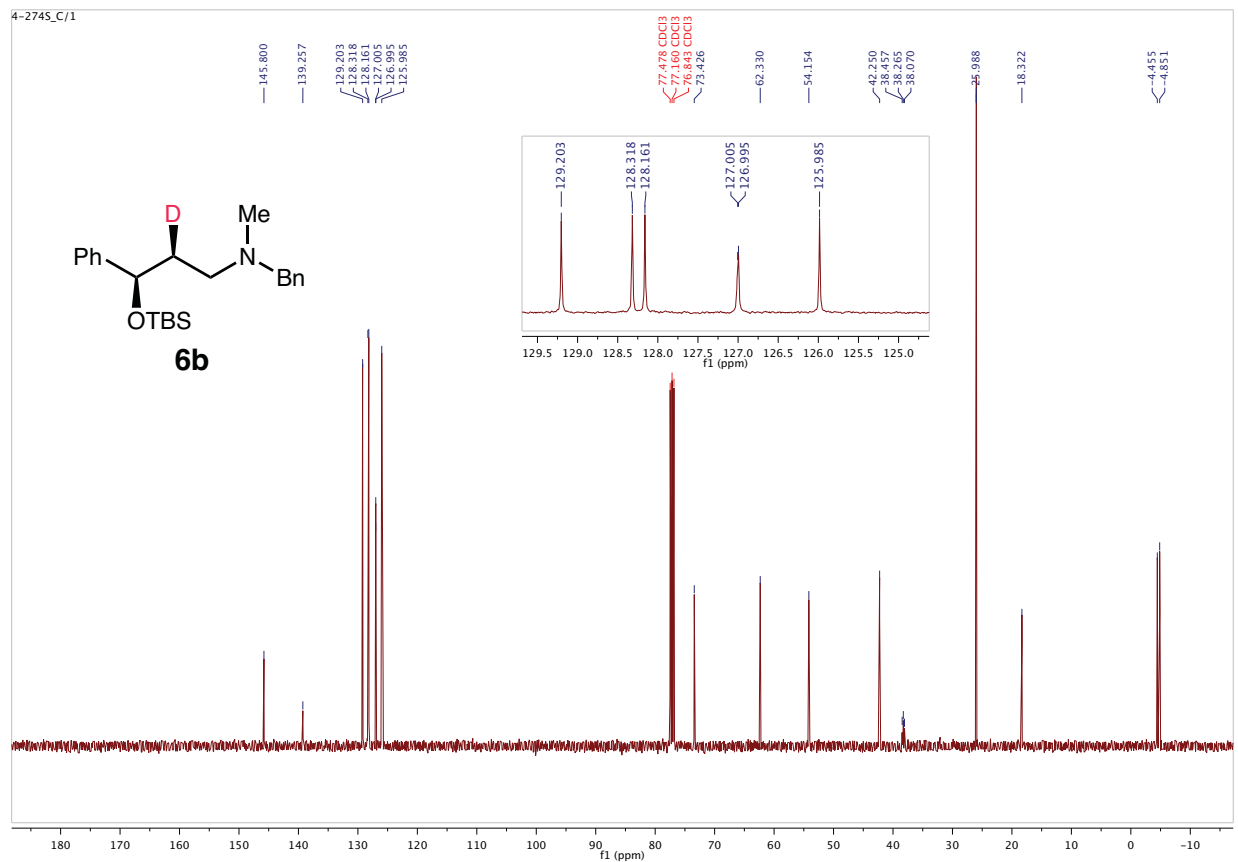

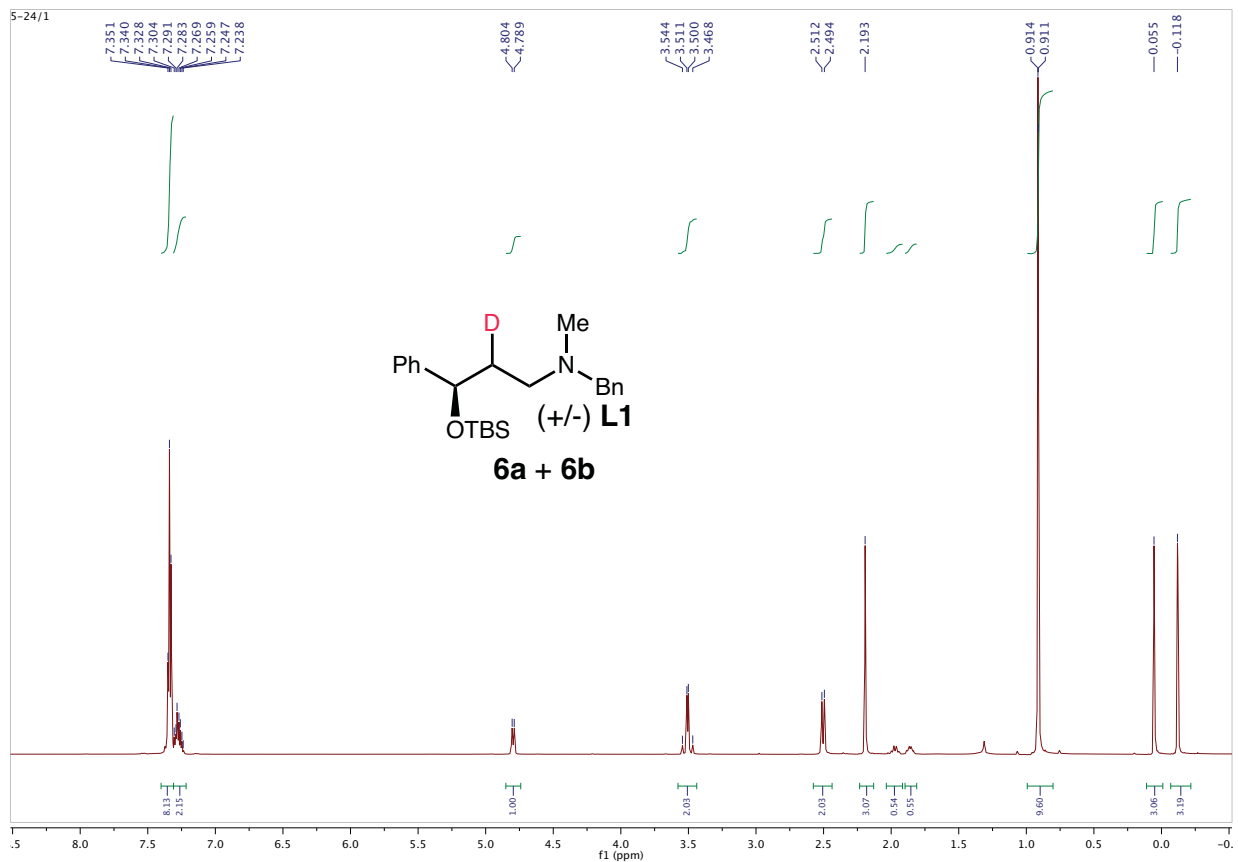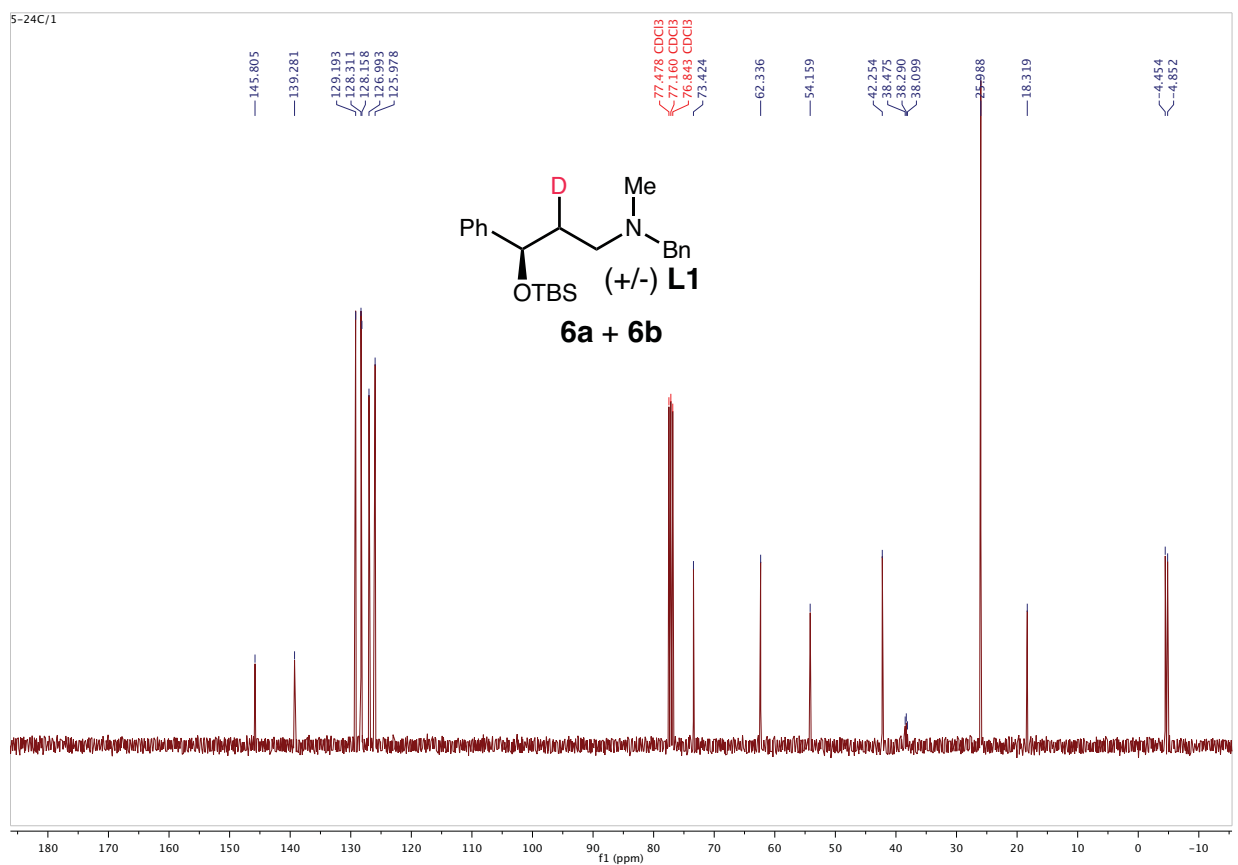



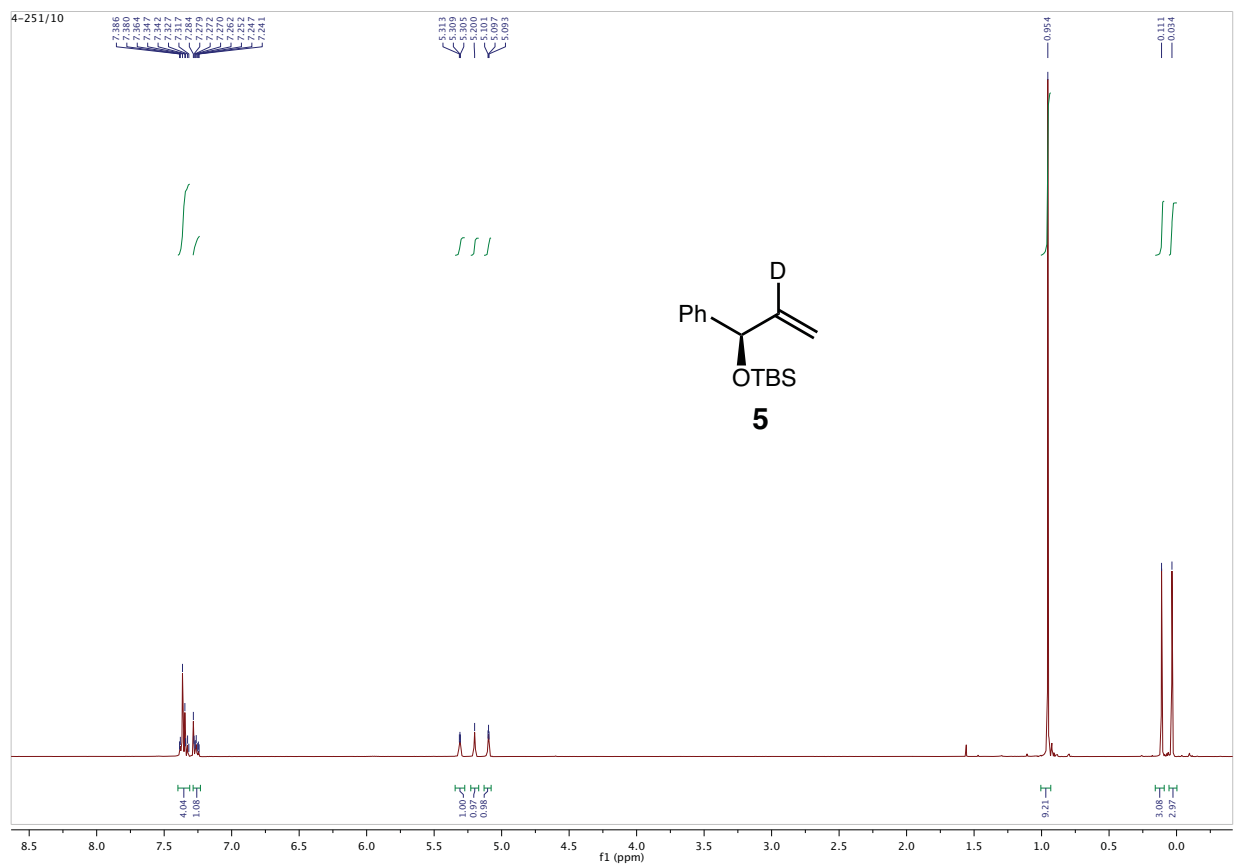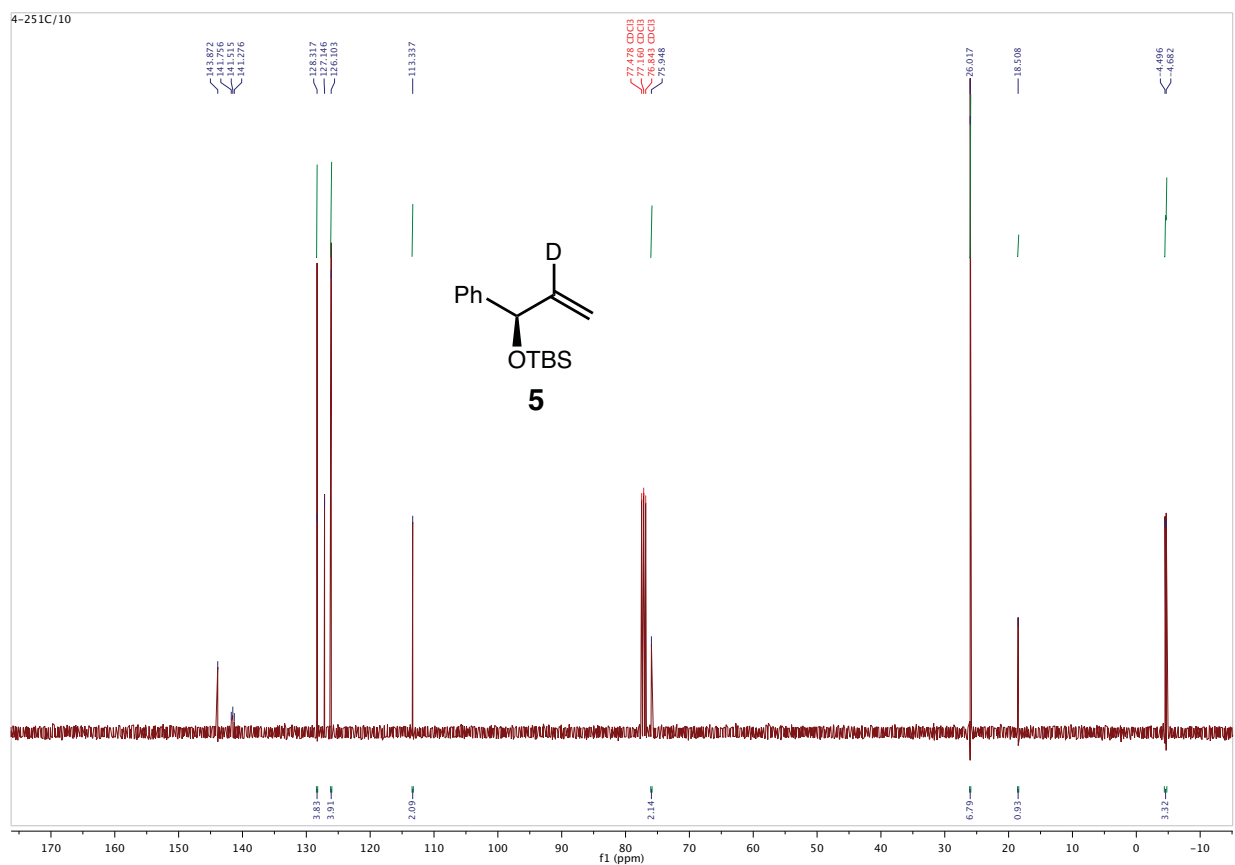

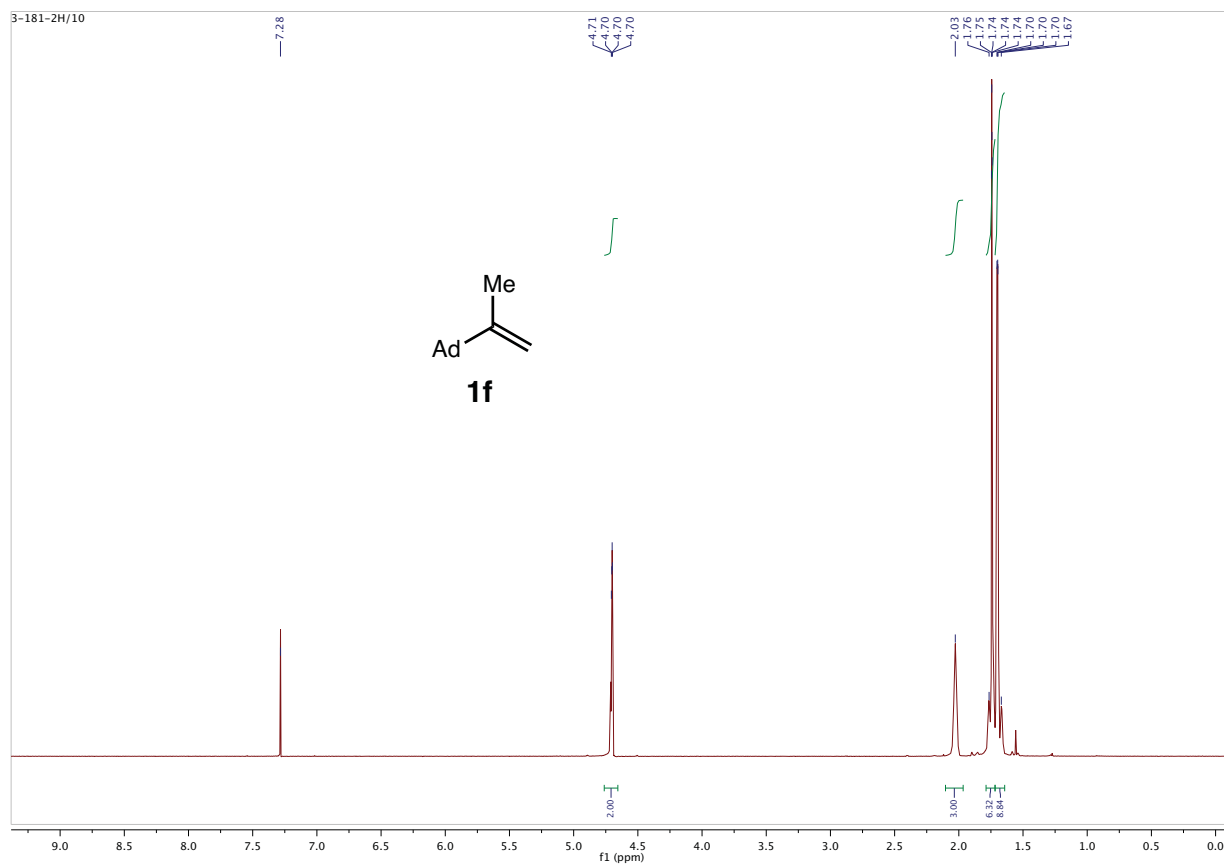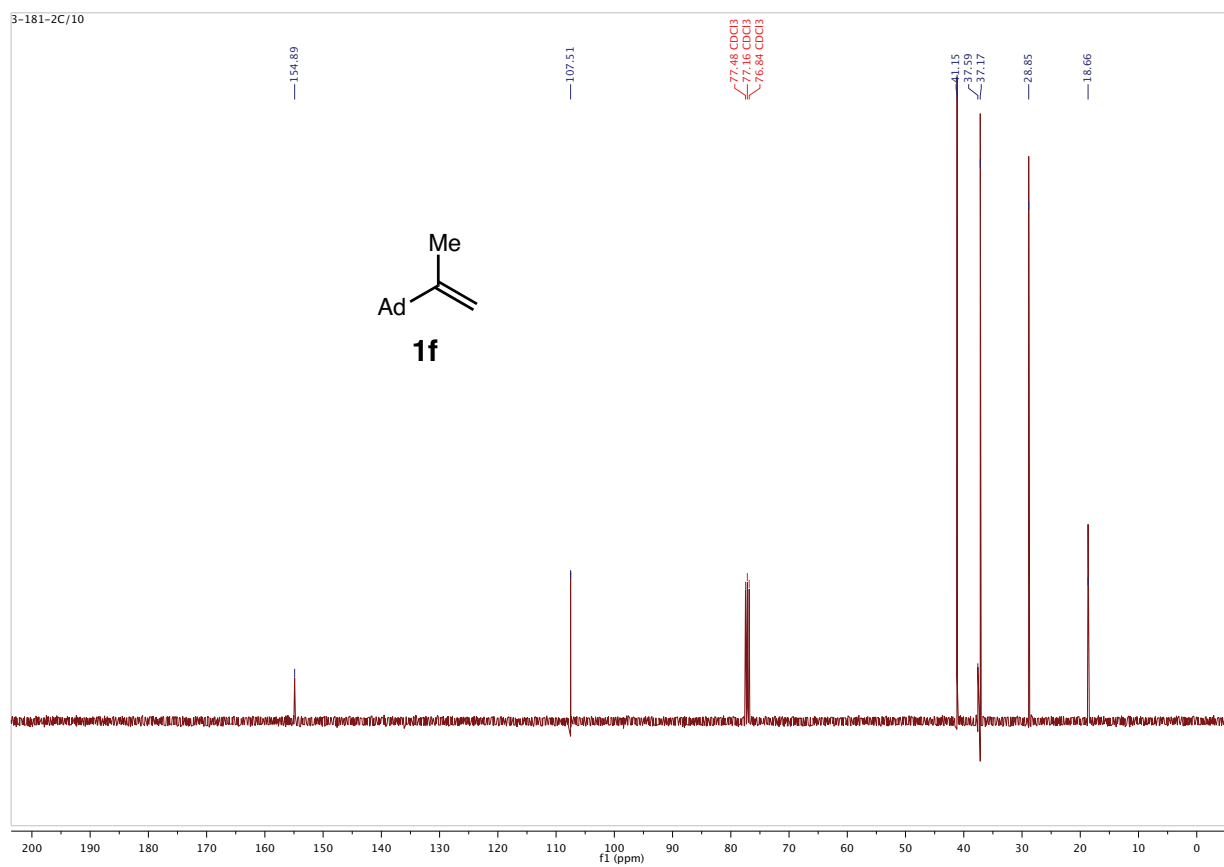

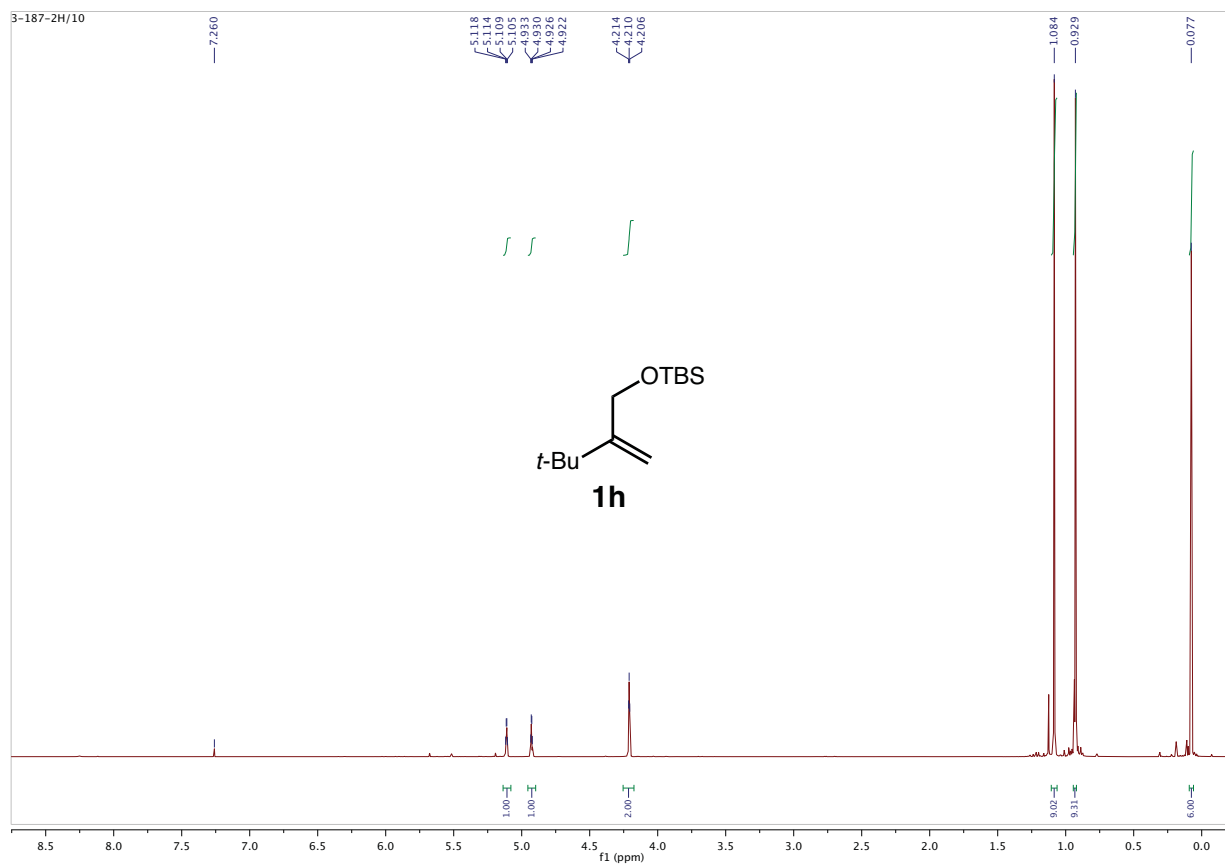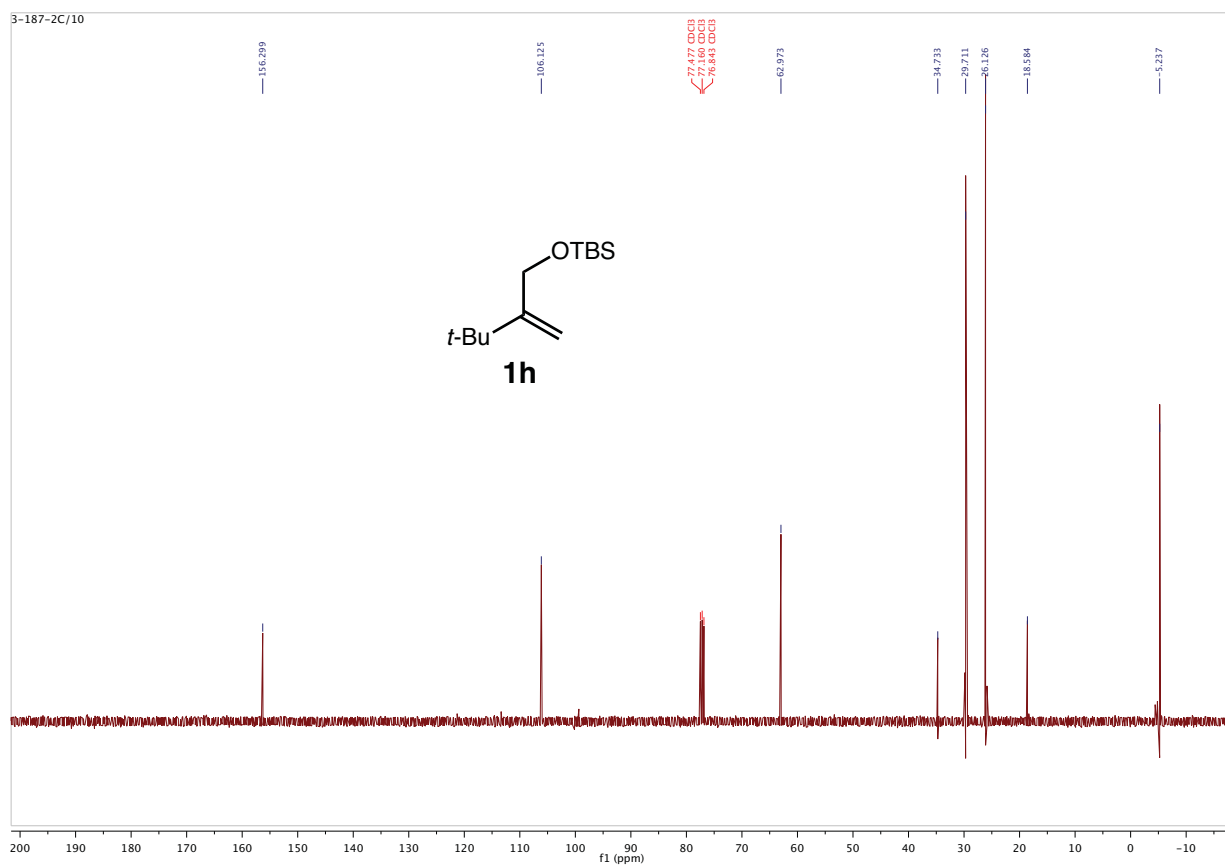

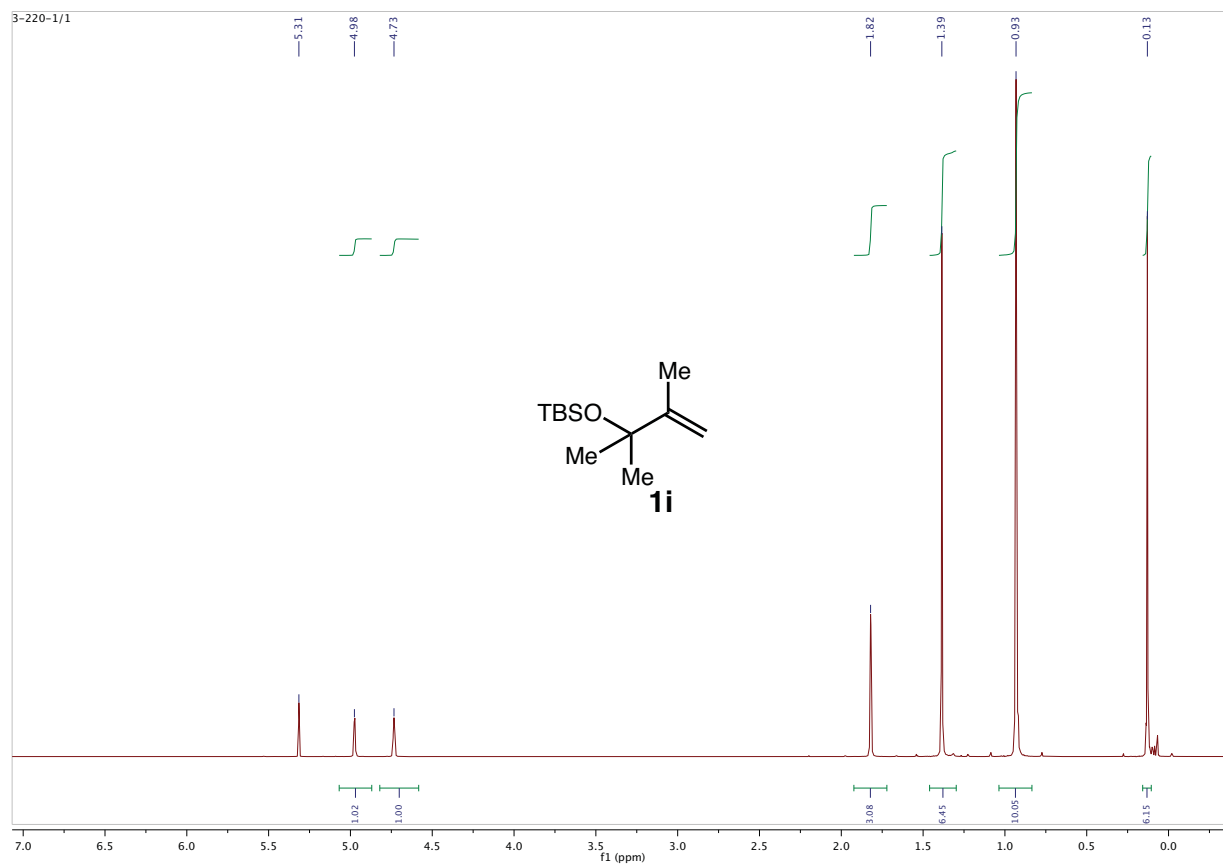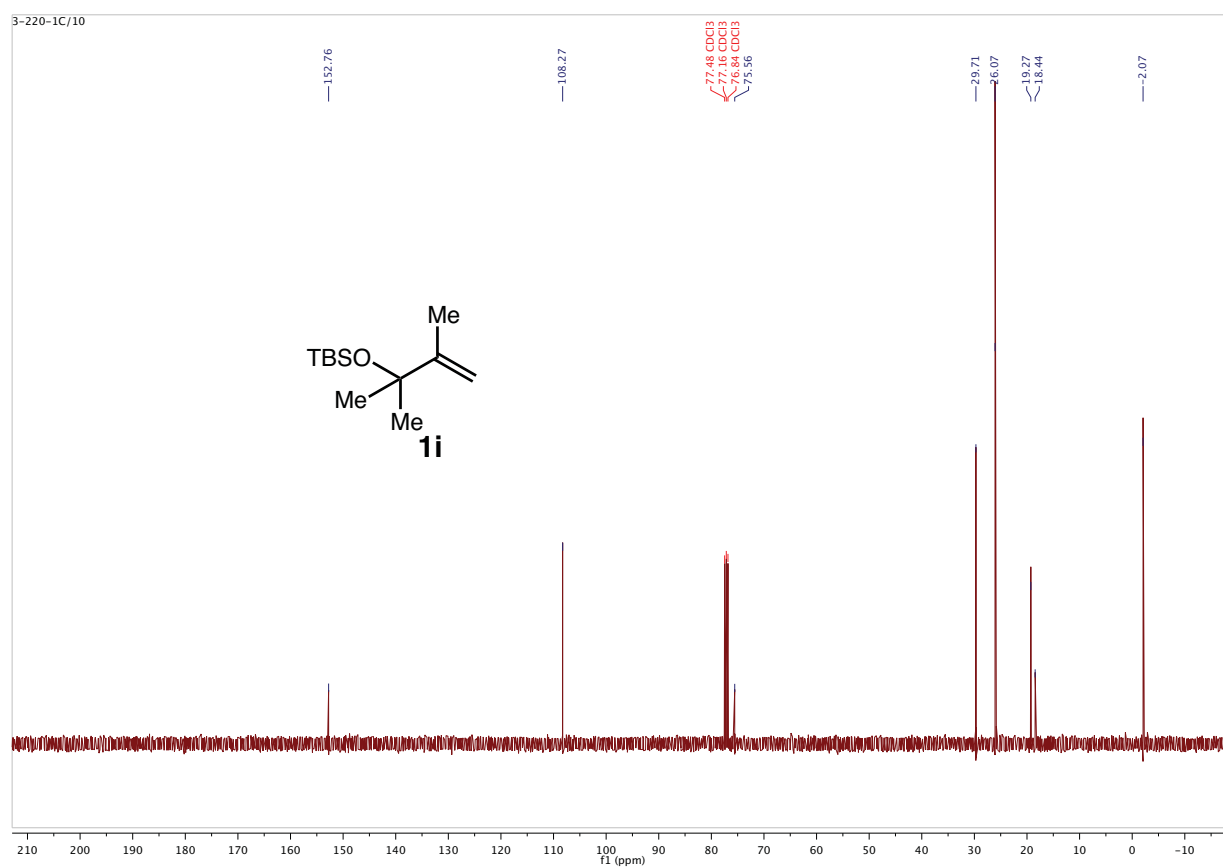

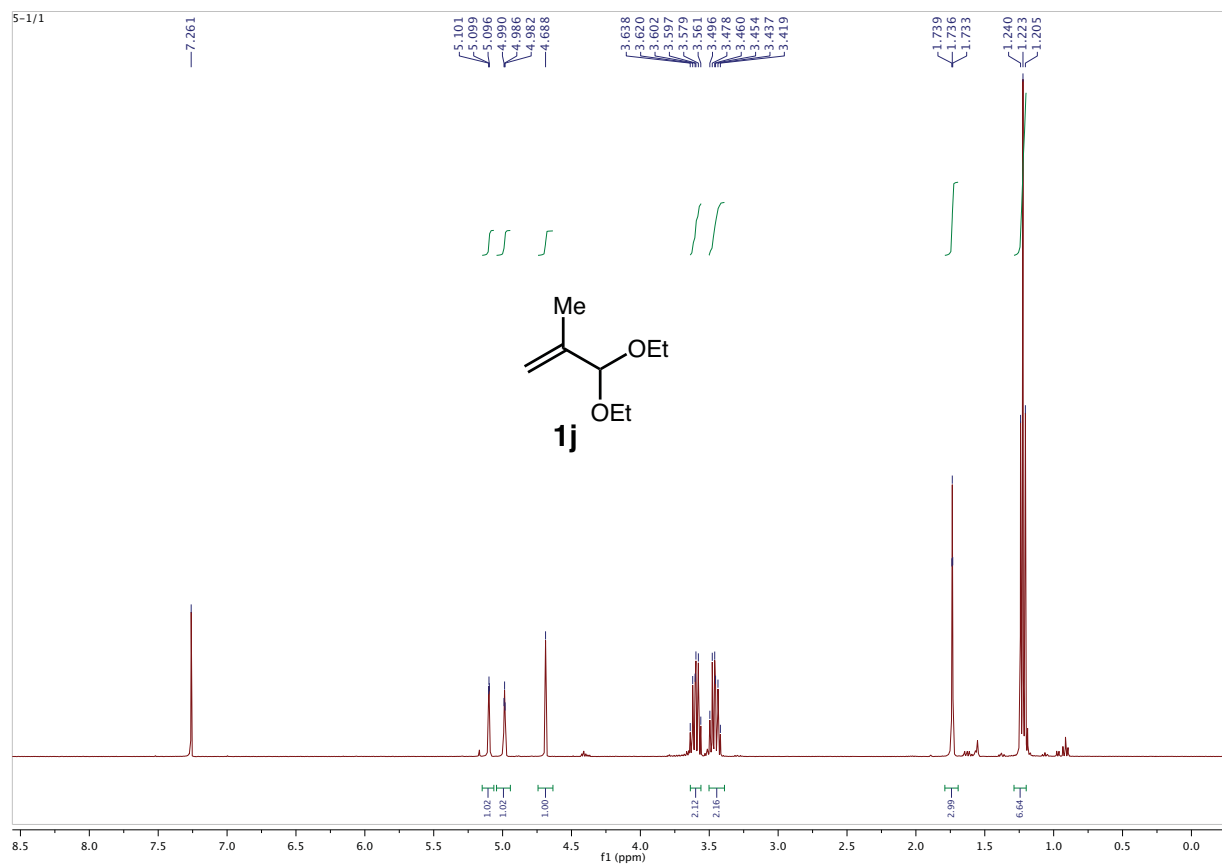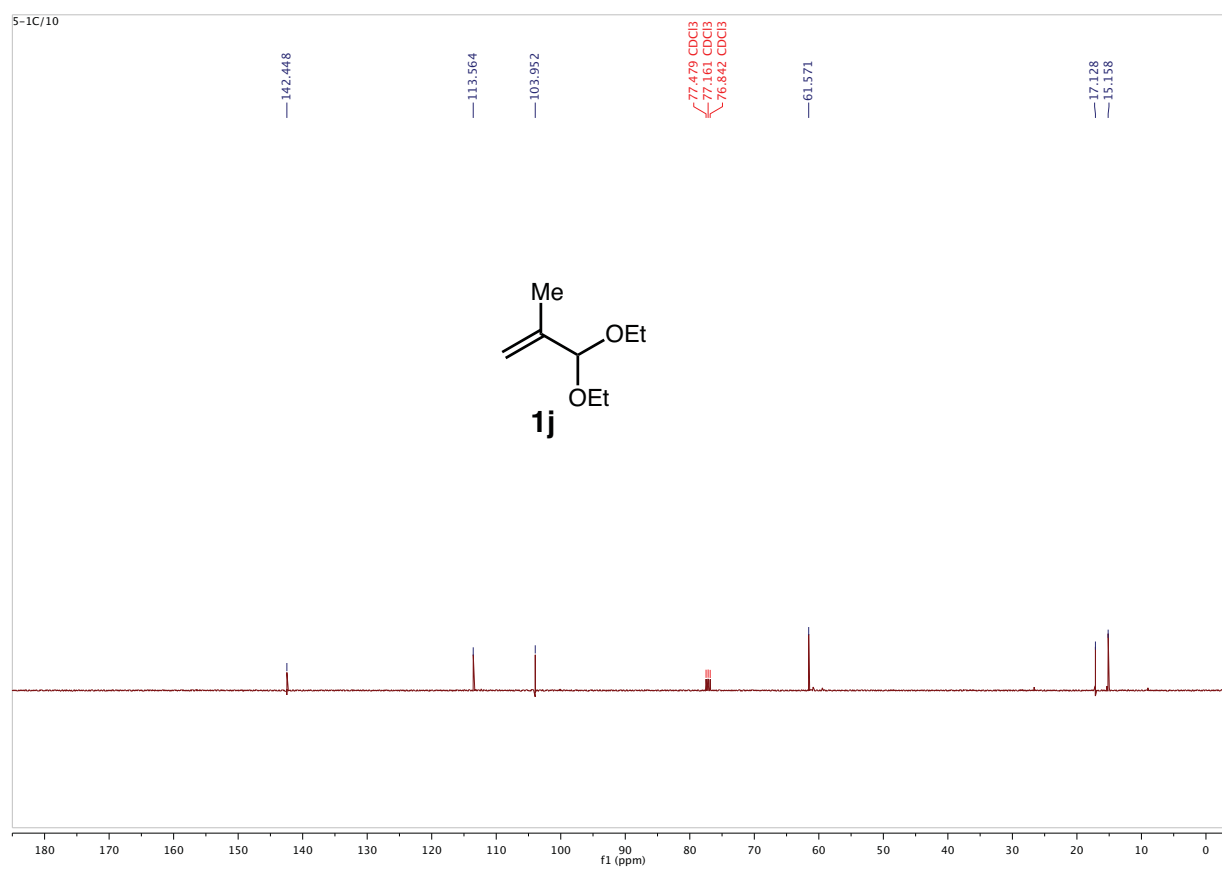

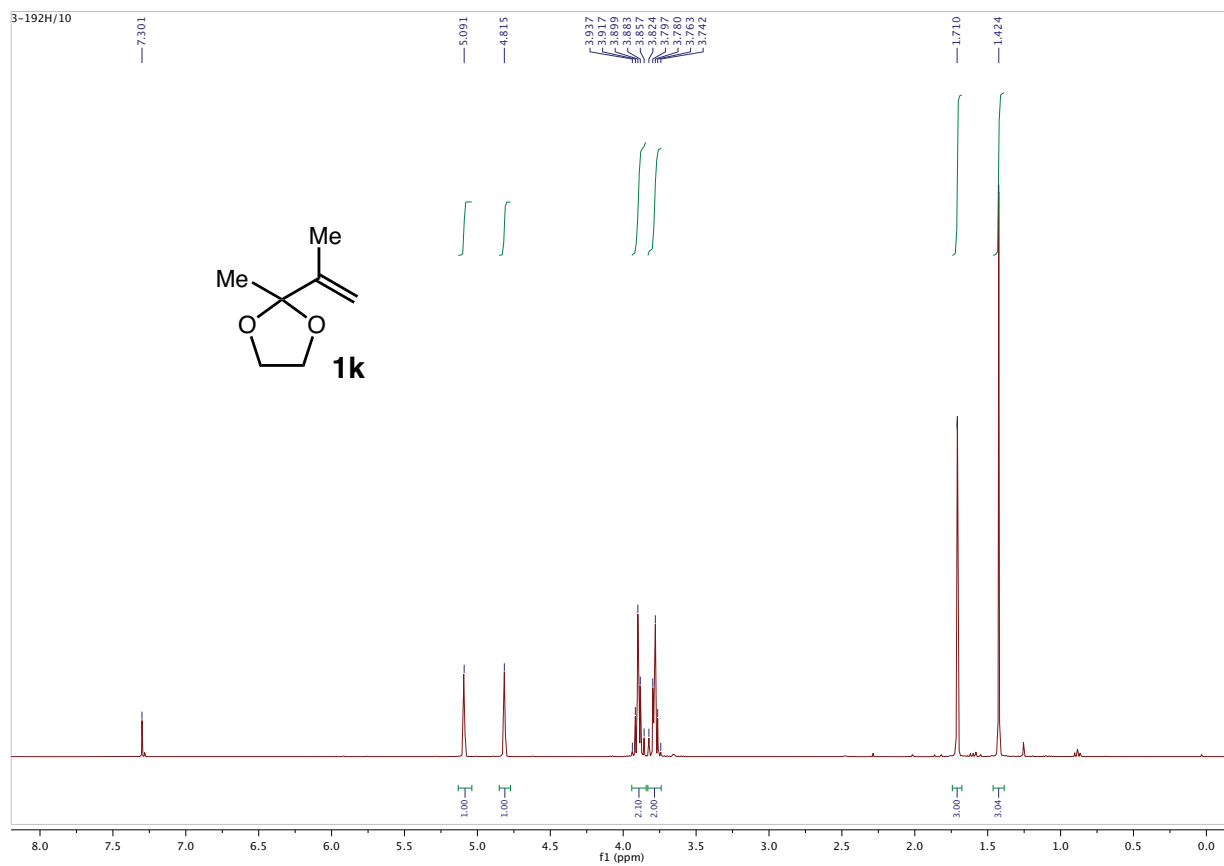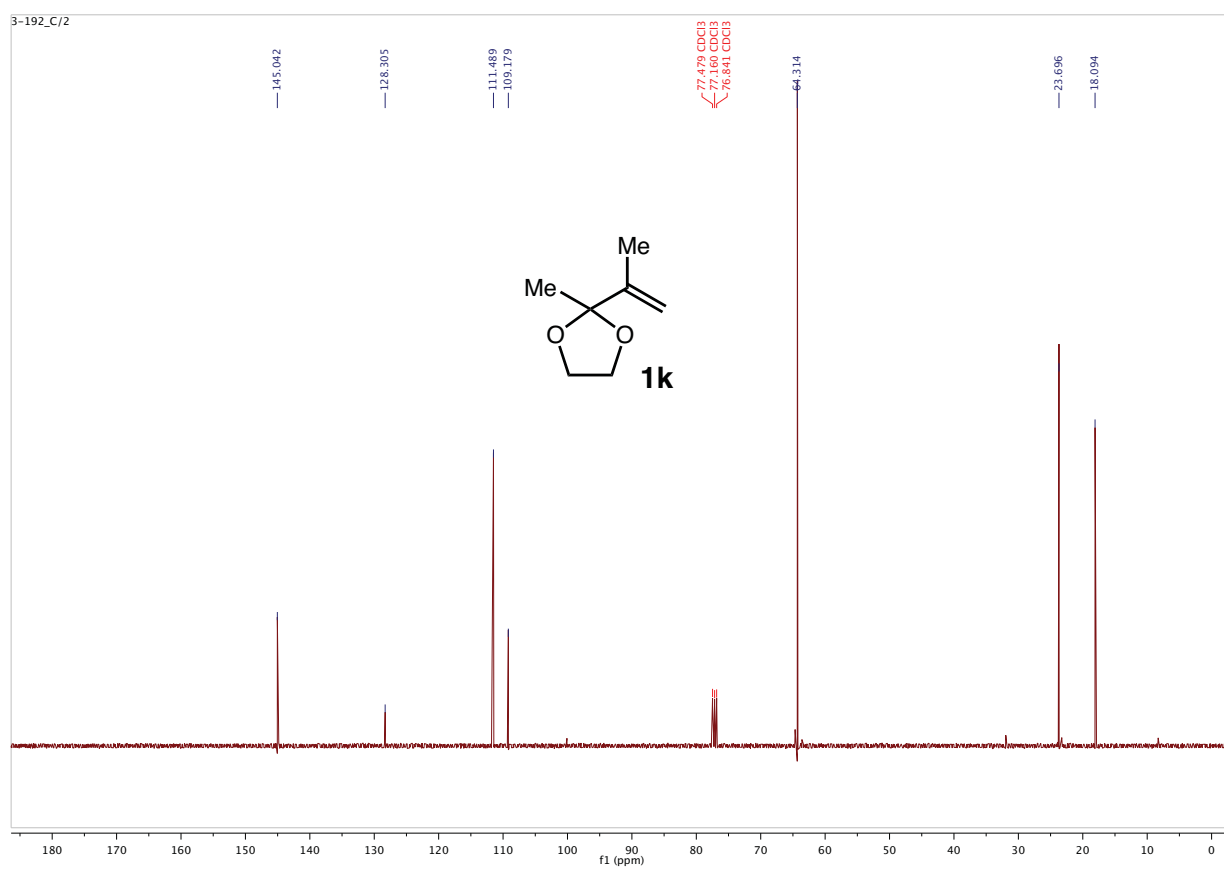

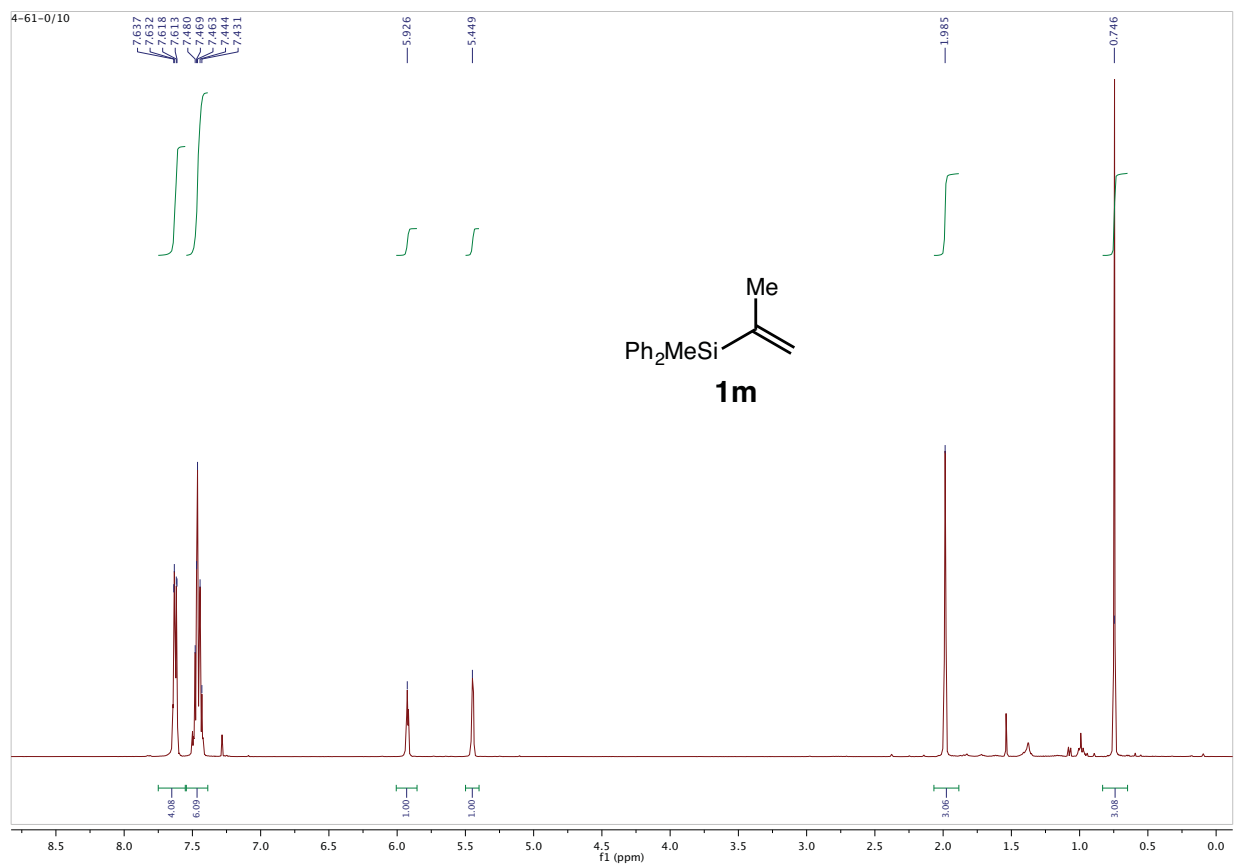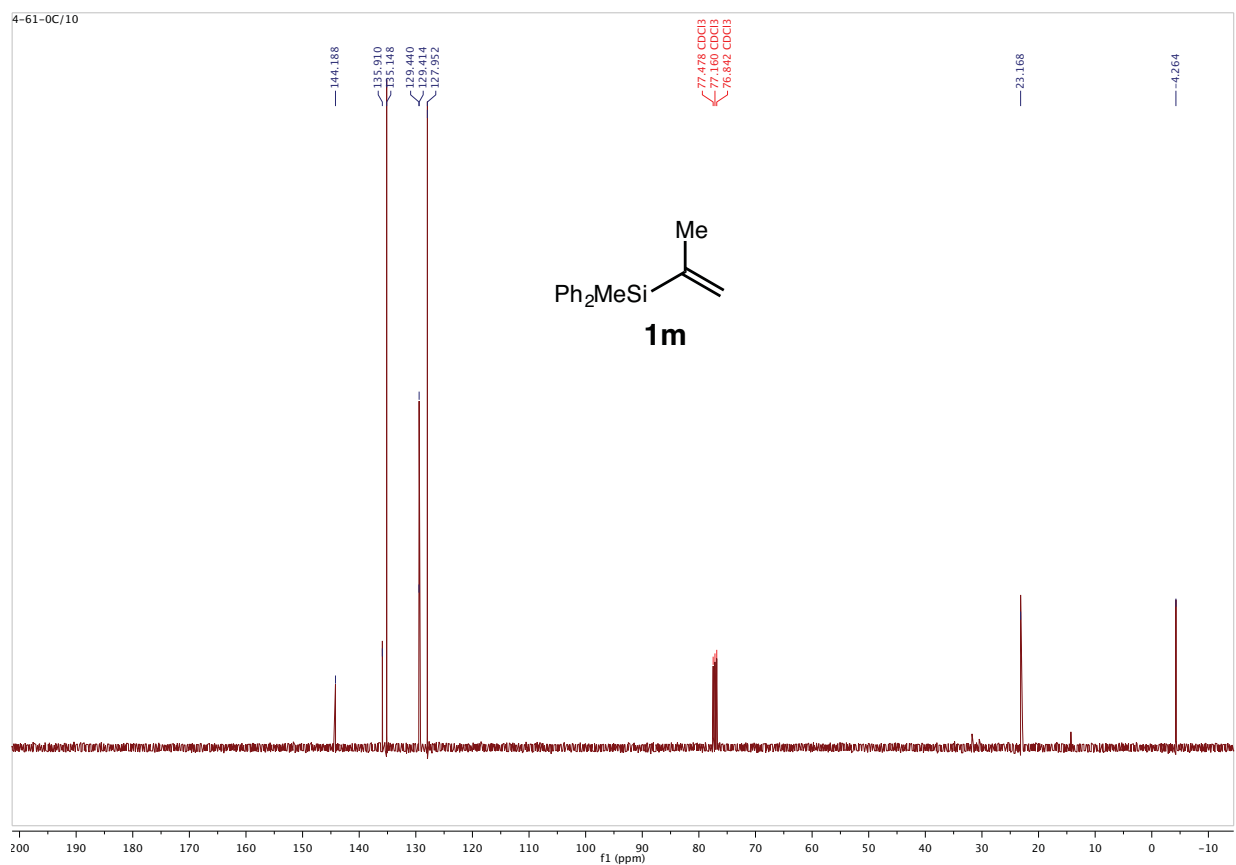

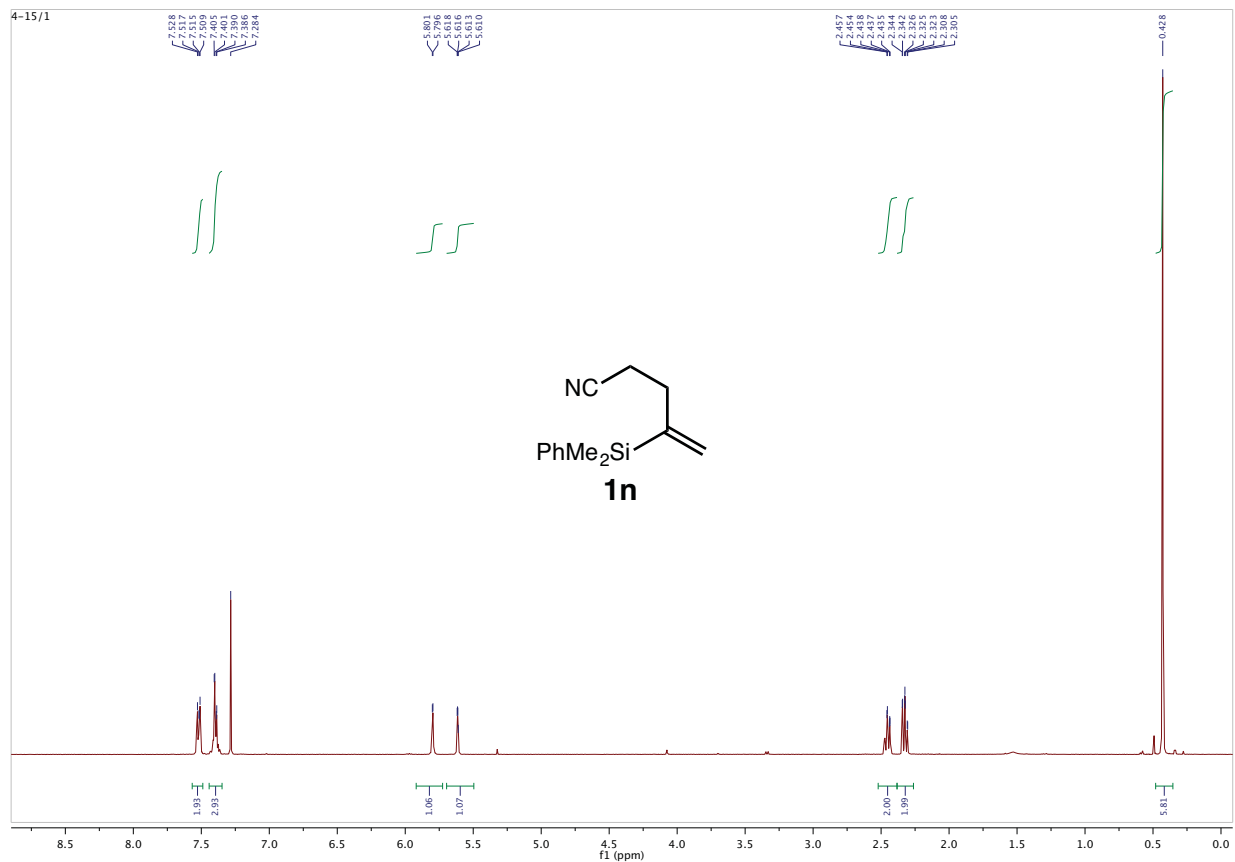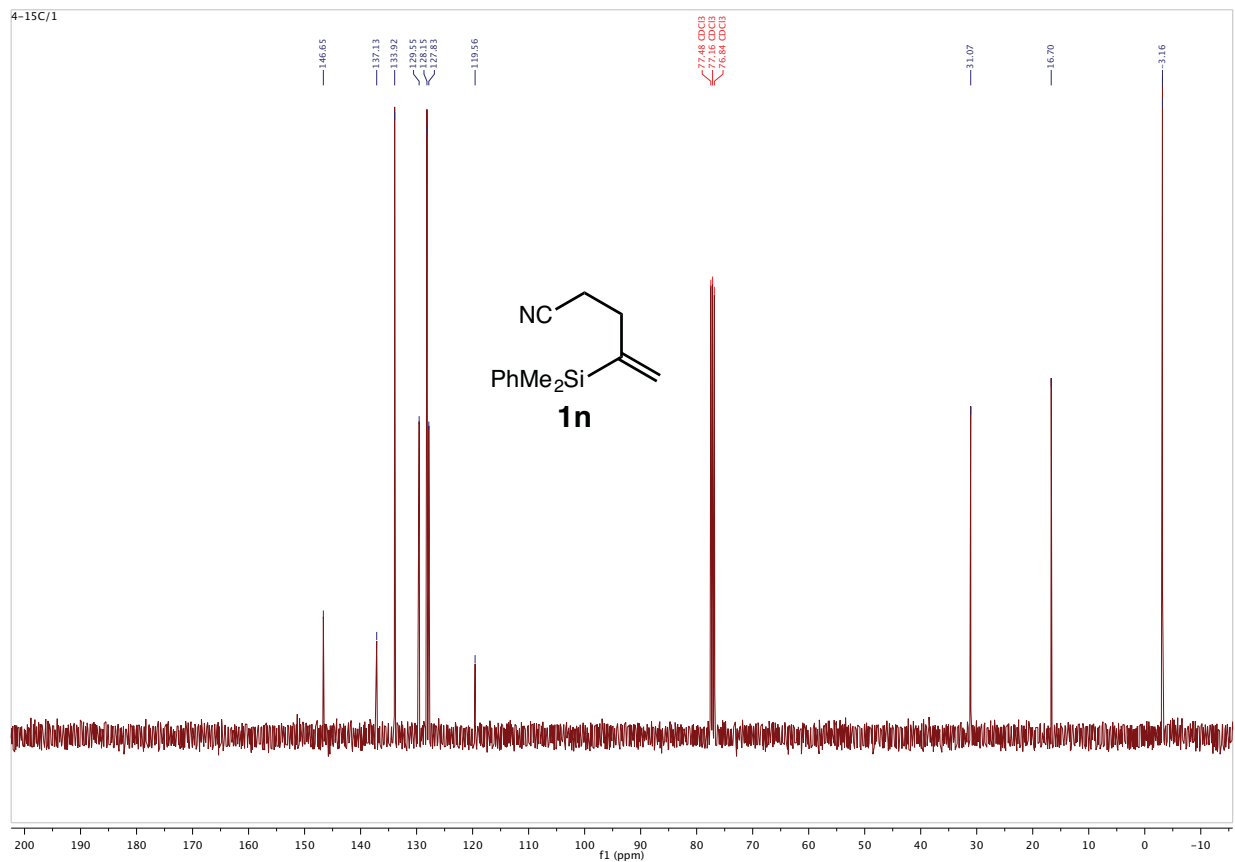



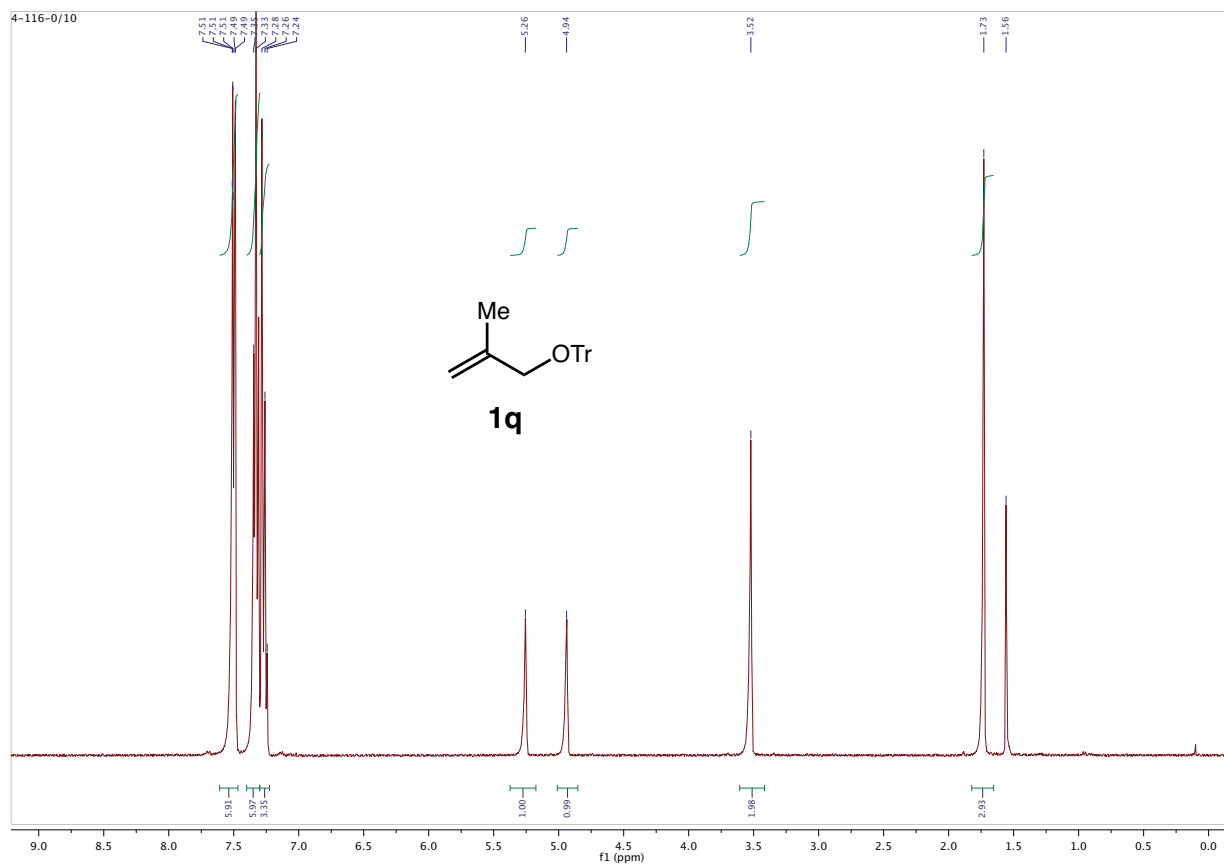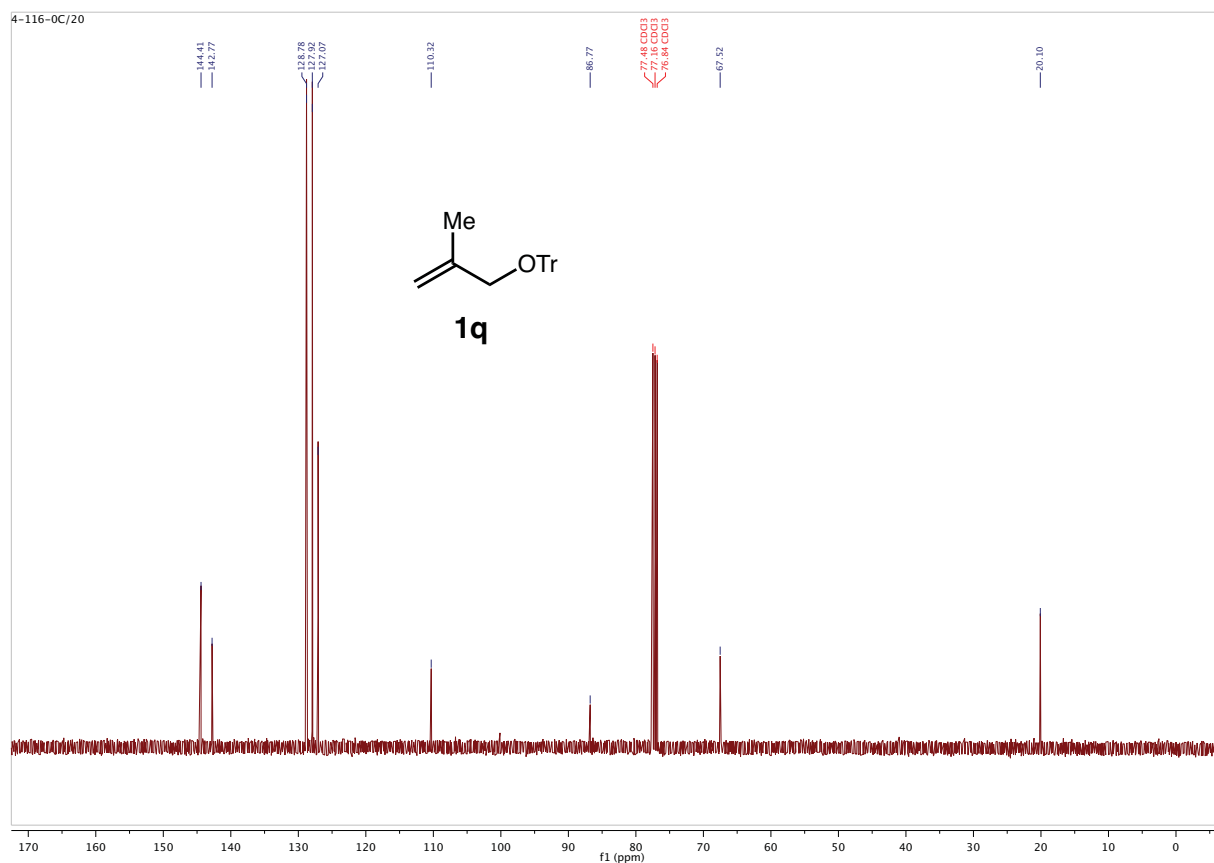

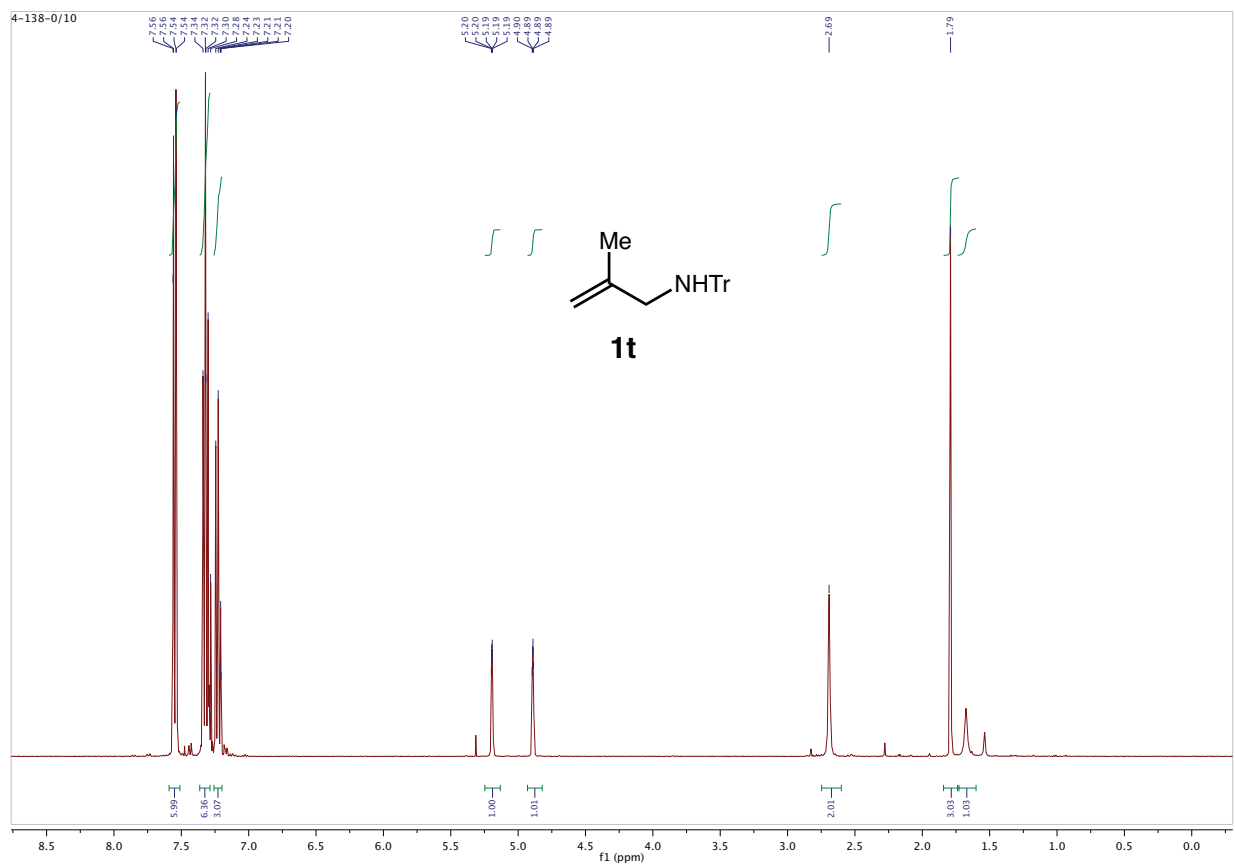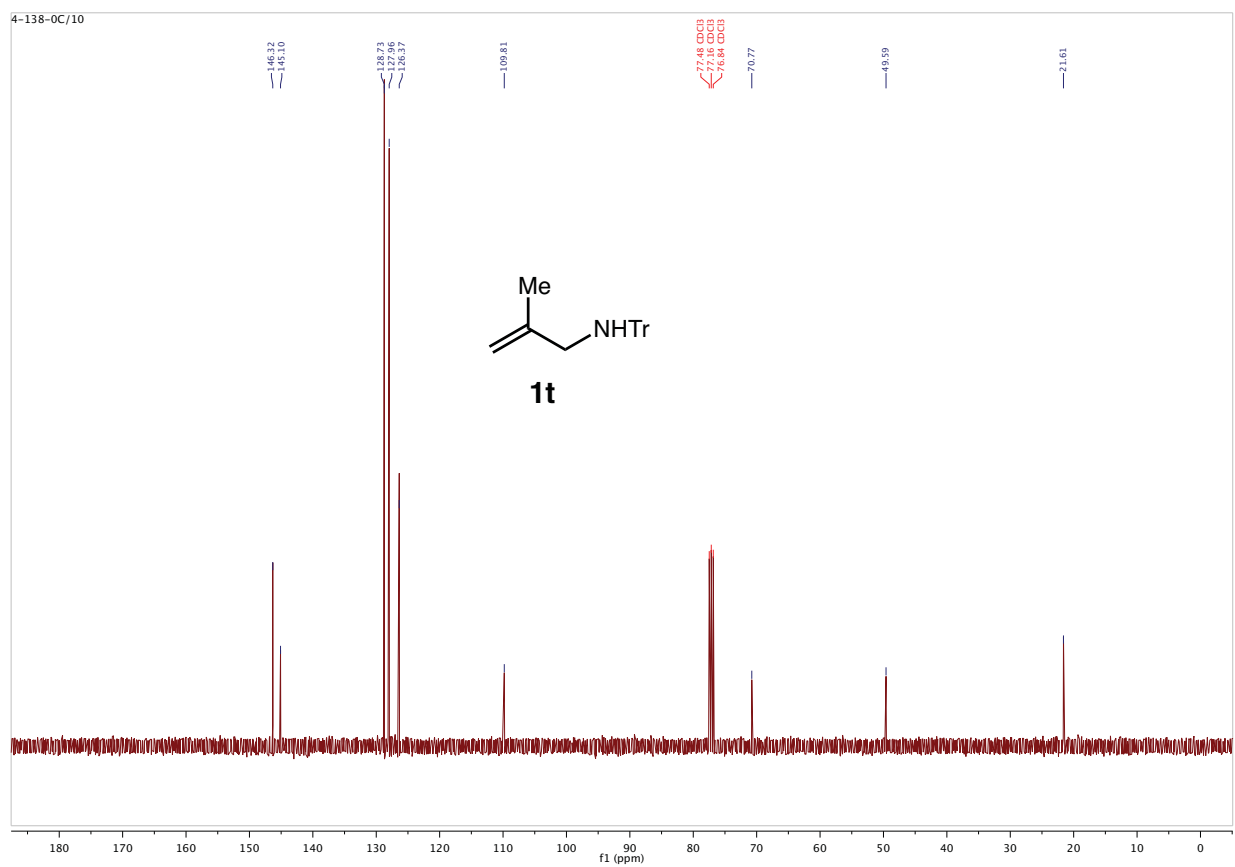

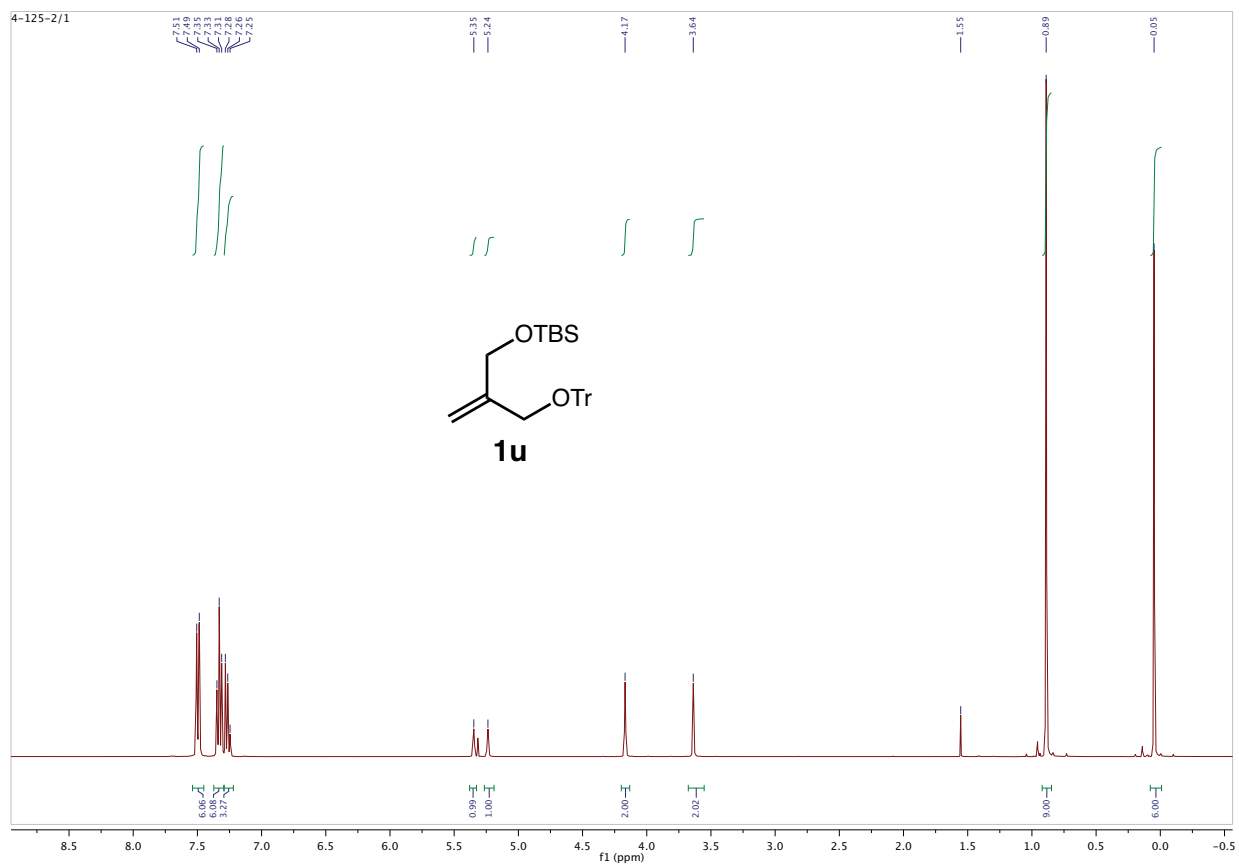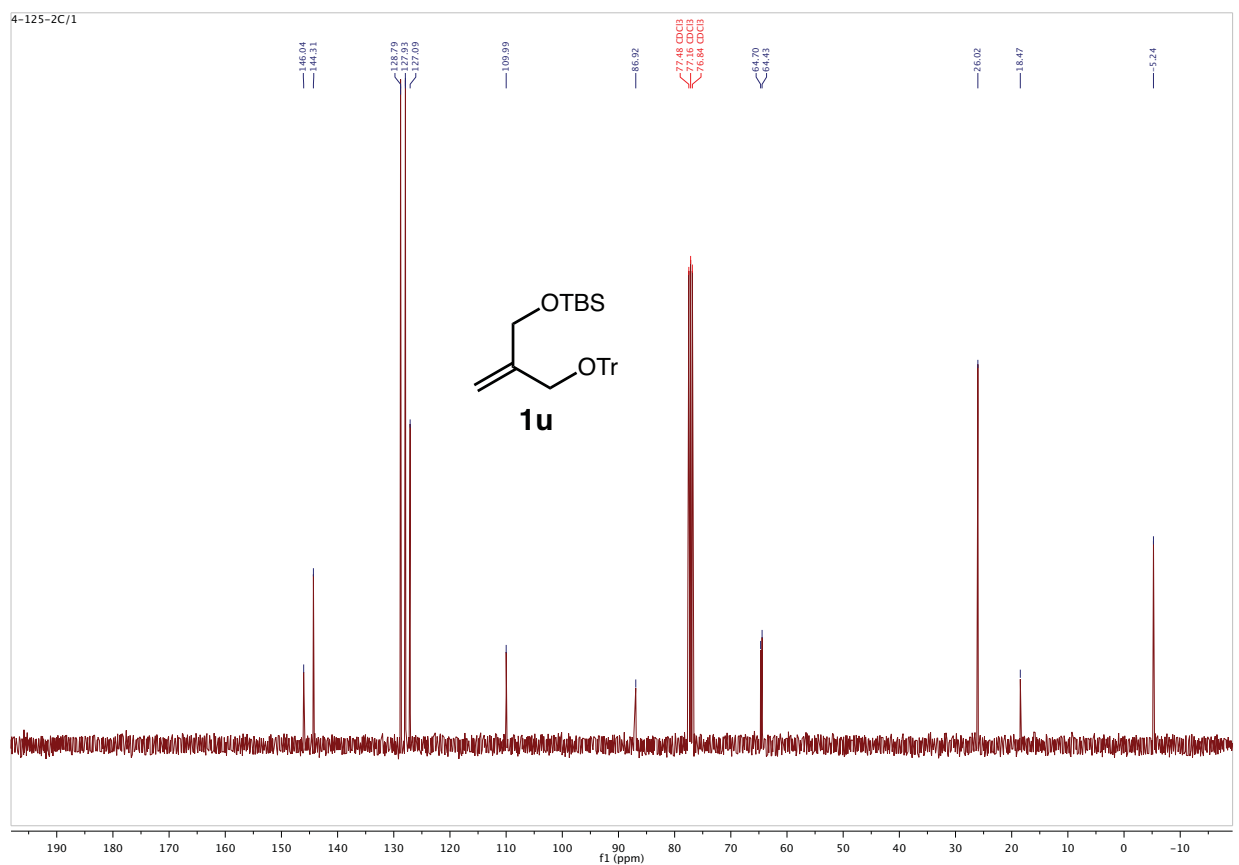

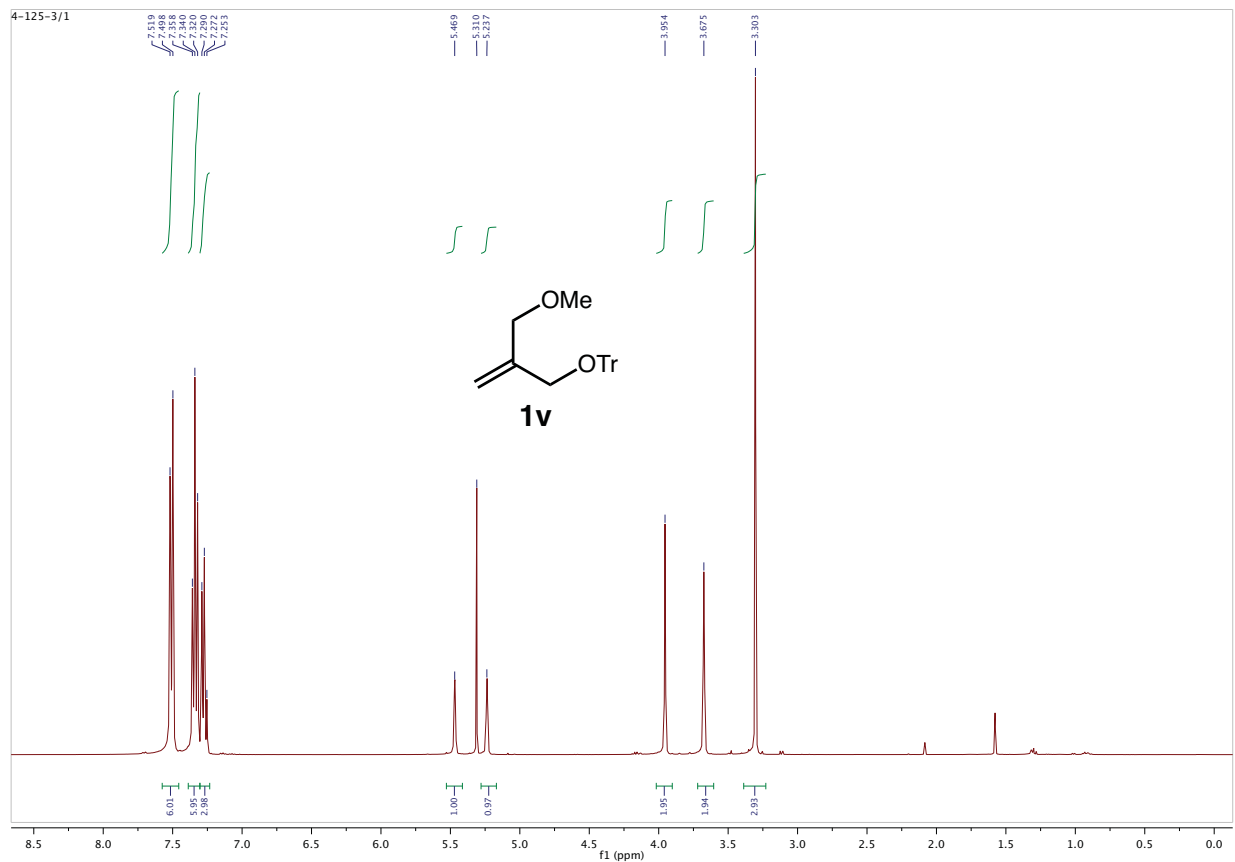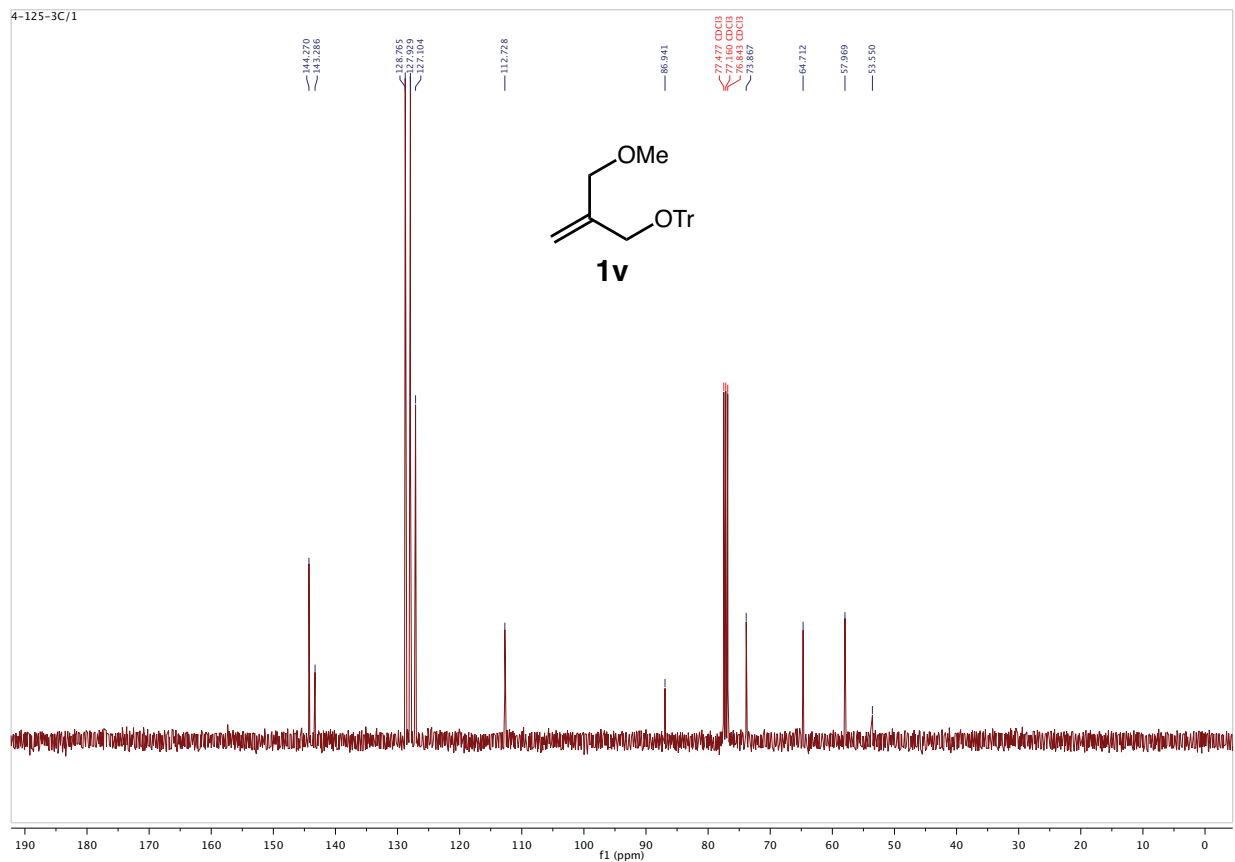

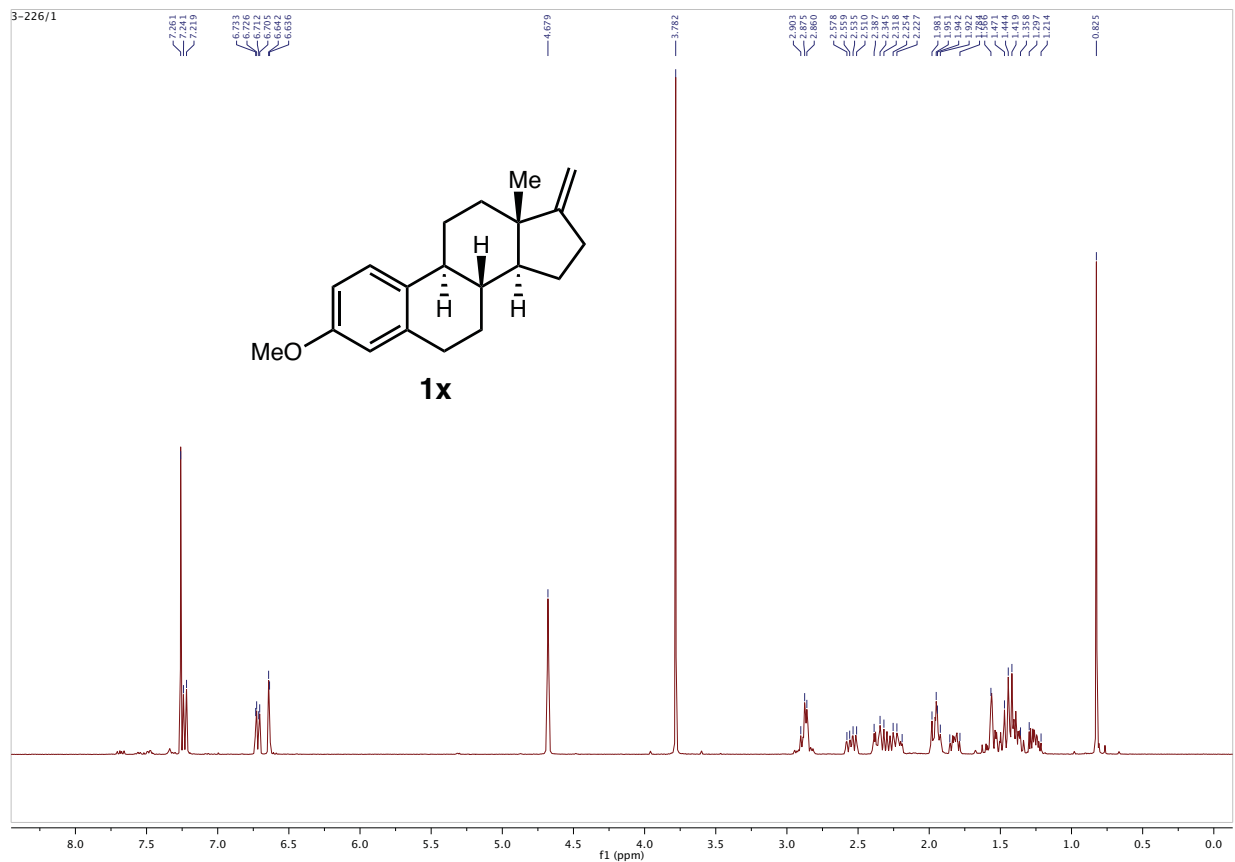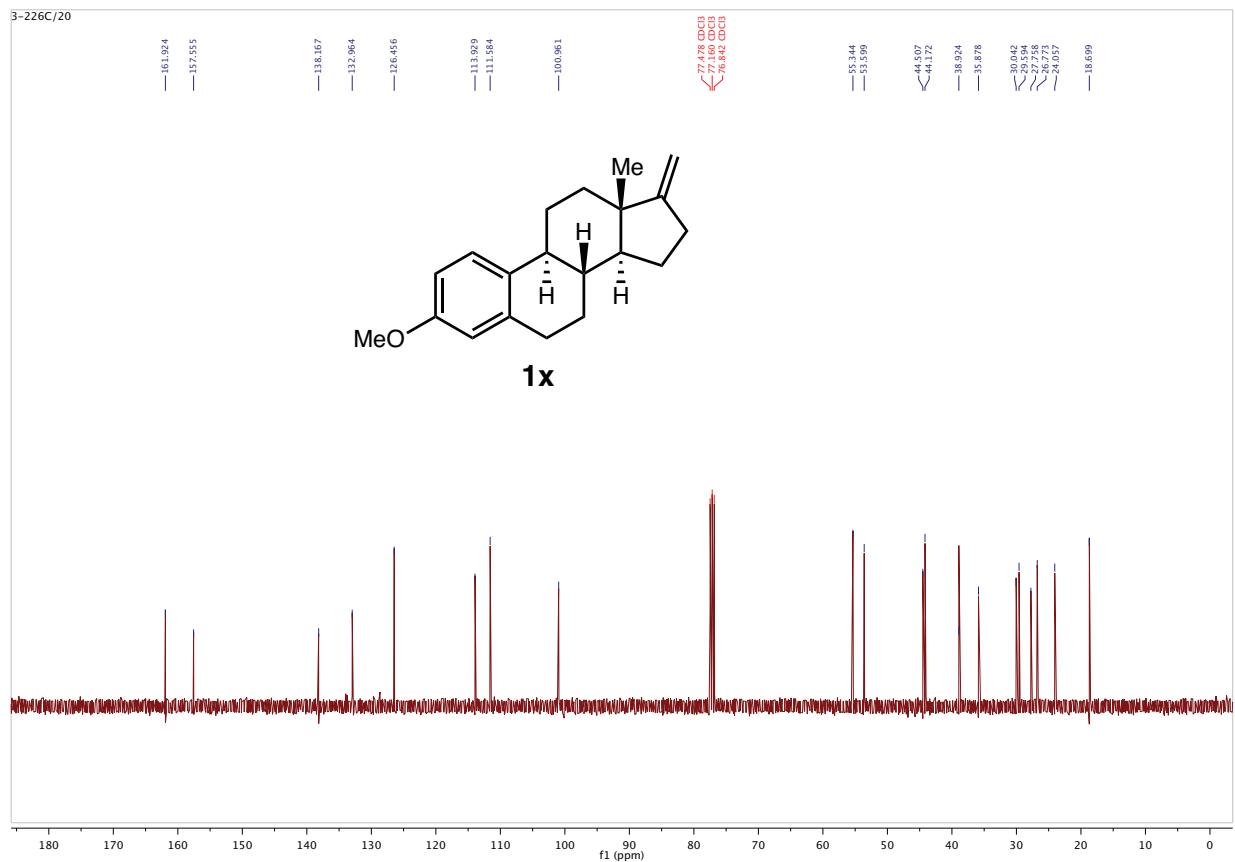

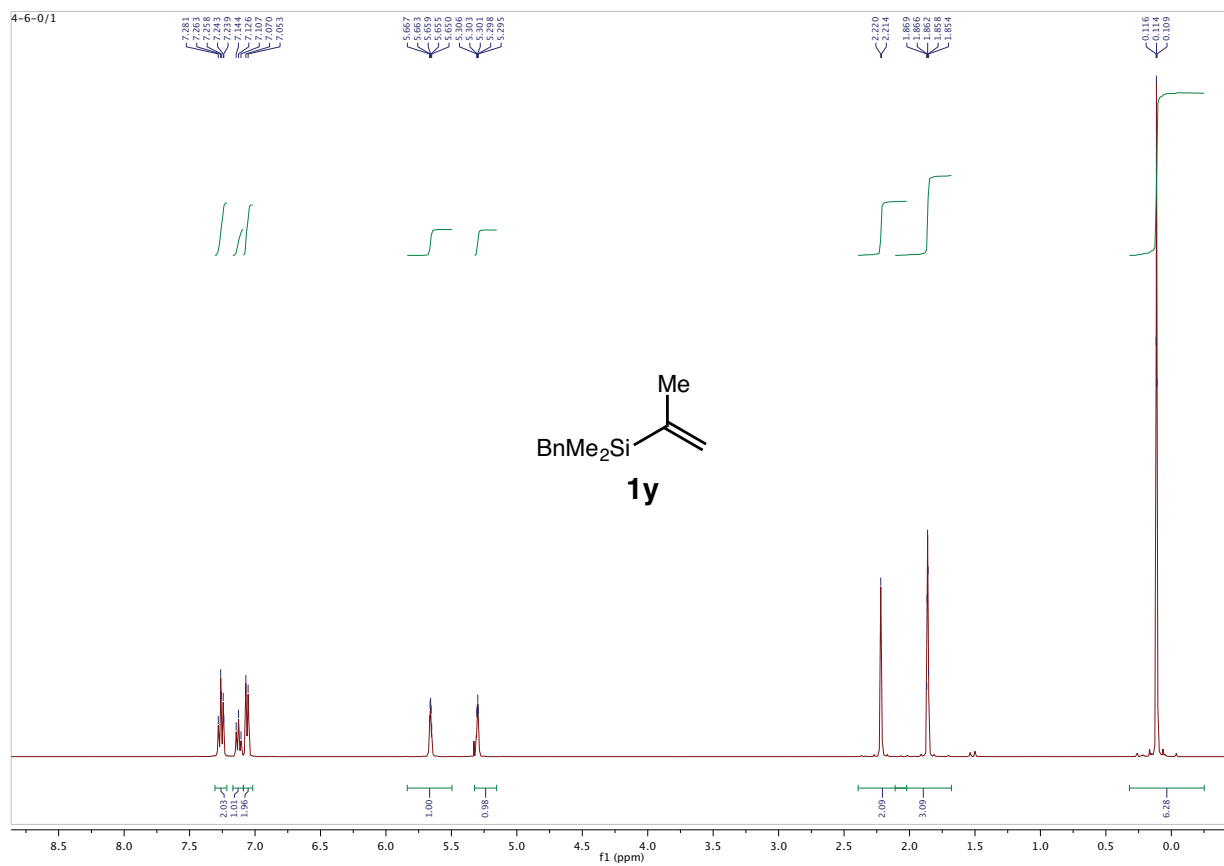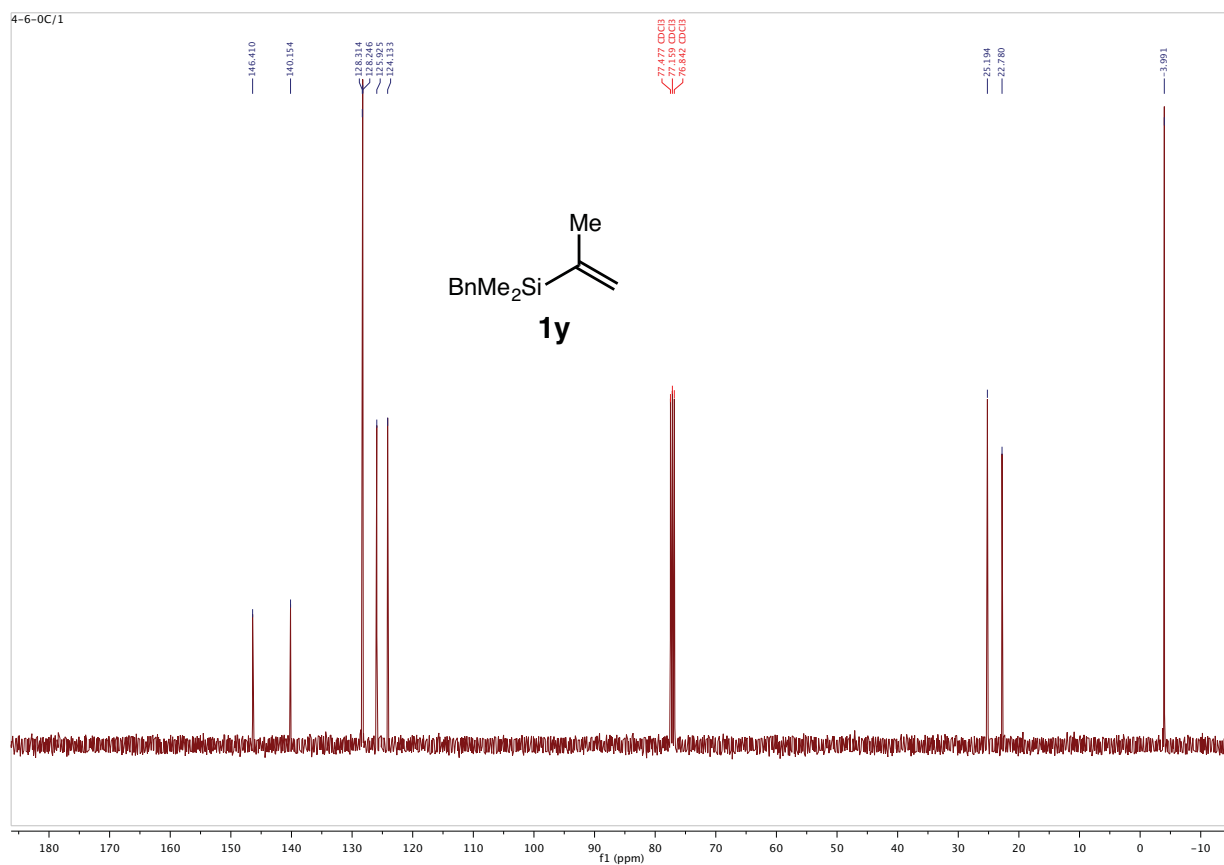

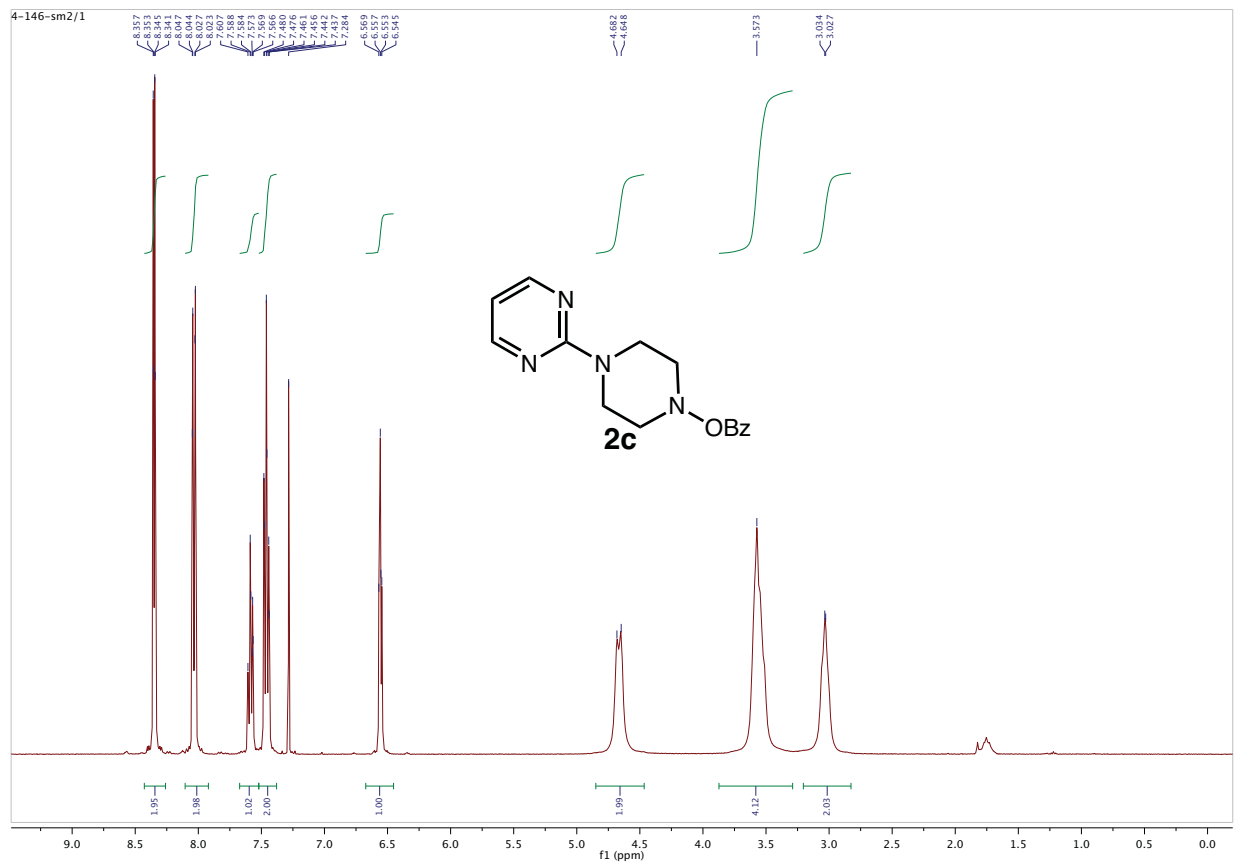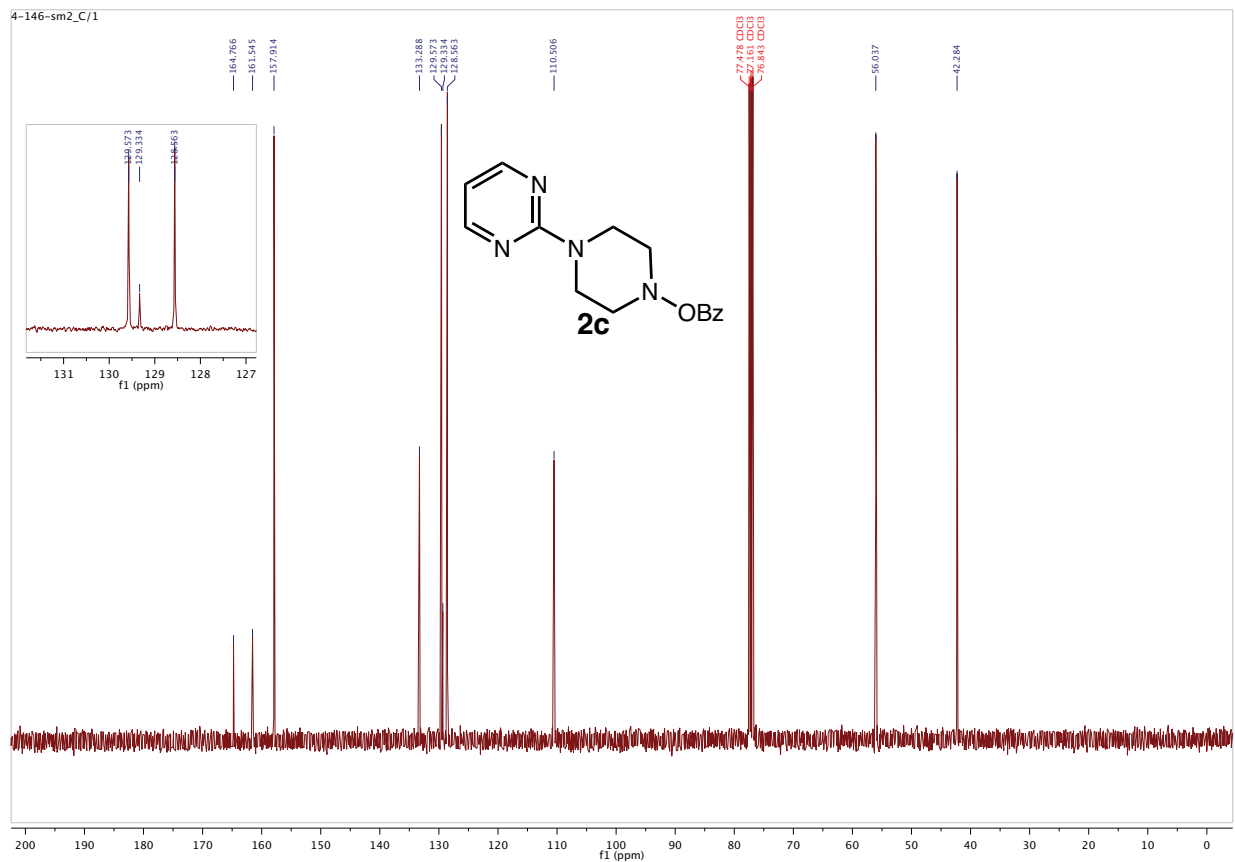

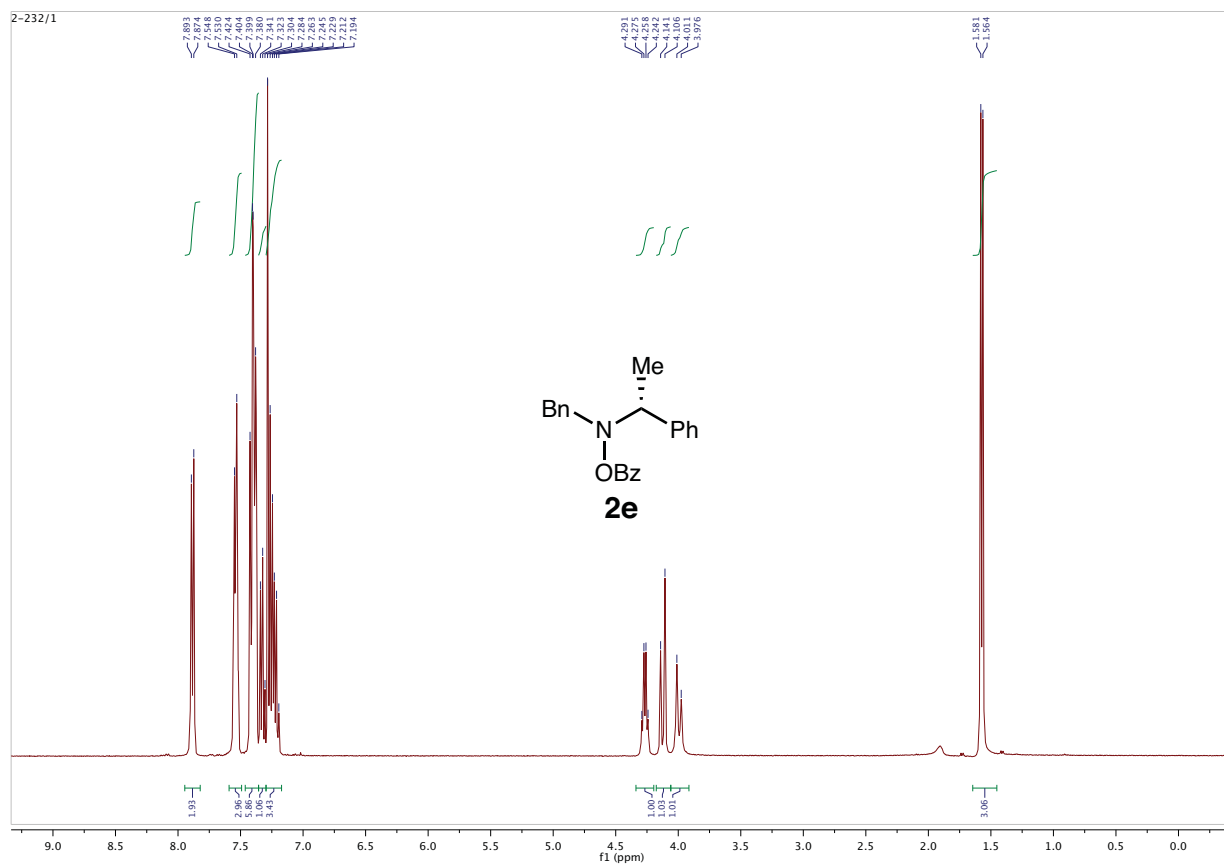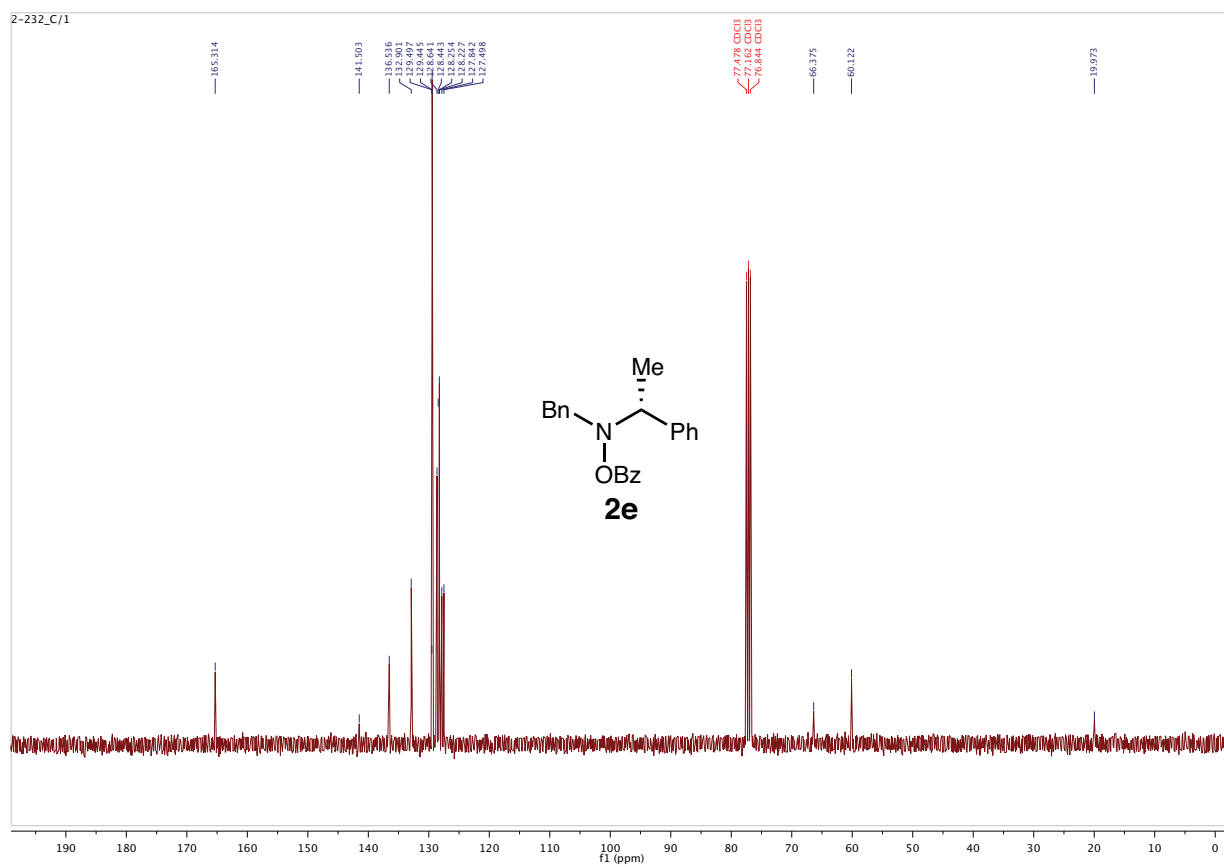



Data File C:\CHEM32\1\DATA\ZHU\NAOYUKI\_LC 2014-07-08 22-49-09\3-168RAC.D  
Sample Name: 3-168RAC

=====

|                                                                               |                               |
|-------------------------------------------------------------------------------|-------------------------------|
| Acq. Operator : AJR                                                           | Seq. Line : 4                 |
| Acq. Instrument : Instrument 1                                                | Location : Vial 53            |
| Injection Date : 7/8/2014 11:52:16 PM                                         | Inj : 1                       |
|                                                                               | Inj Volume : 5 $\mu$ l        |
| Different Inj Volume from Sequence !                                          | Actual Inj Volume : 3 $\mu$ l |
| Acq. Method : C:\CHEM32\1\DATA\ZHU\NAOYUKI_LC 2014-07-08 22-49-09\03-30ETOH.M |                               |
| Last changed : 7/8/2014 11:18:47 PM by AJR                                    |                               |
|                                                                               | (modified after loading)      |
| Analysis Method : C:\CHEM32\1\METHODS\YMWHEXANES_PT8.M                        |                               |
| Last changed : 9/22/2014 2:08:19 AM by RZ                                     |                               |
|                                                                               | (modified after loading)      |

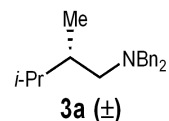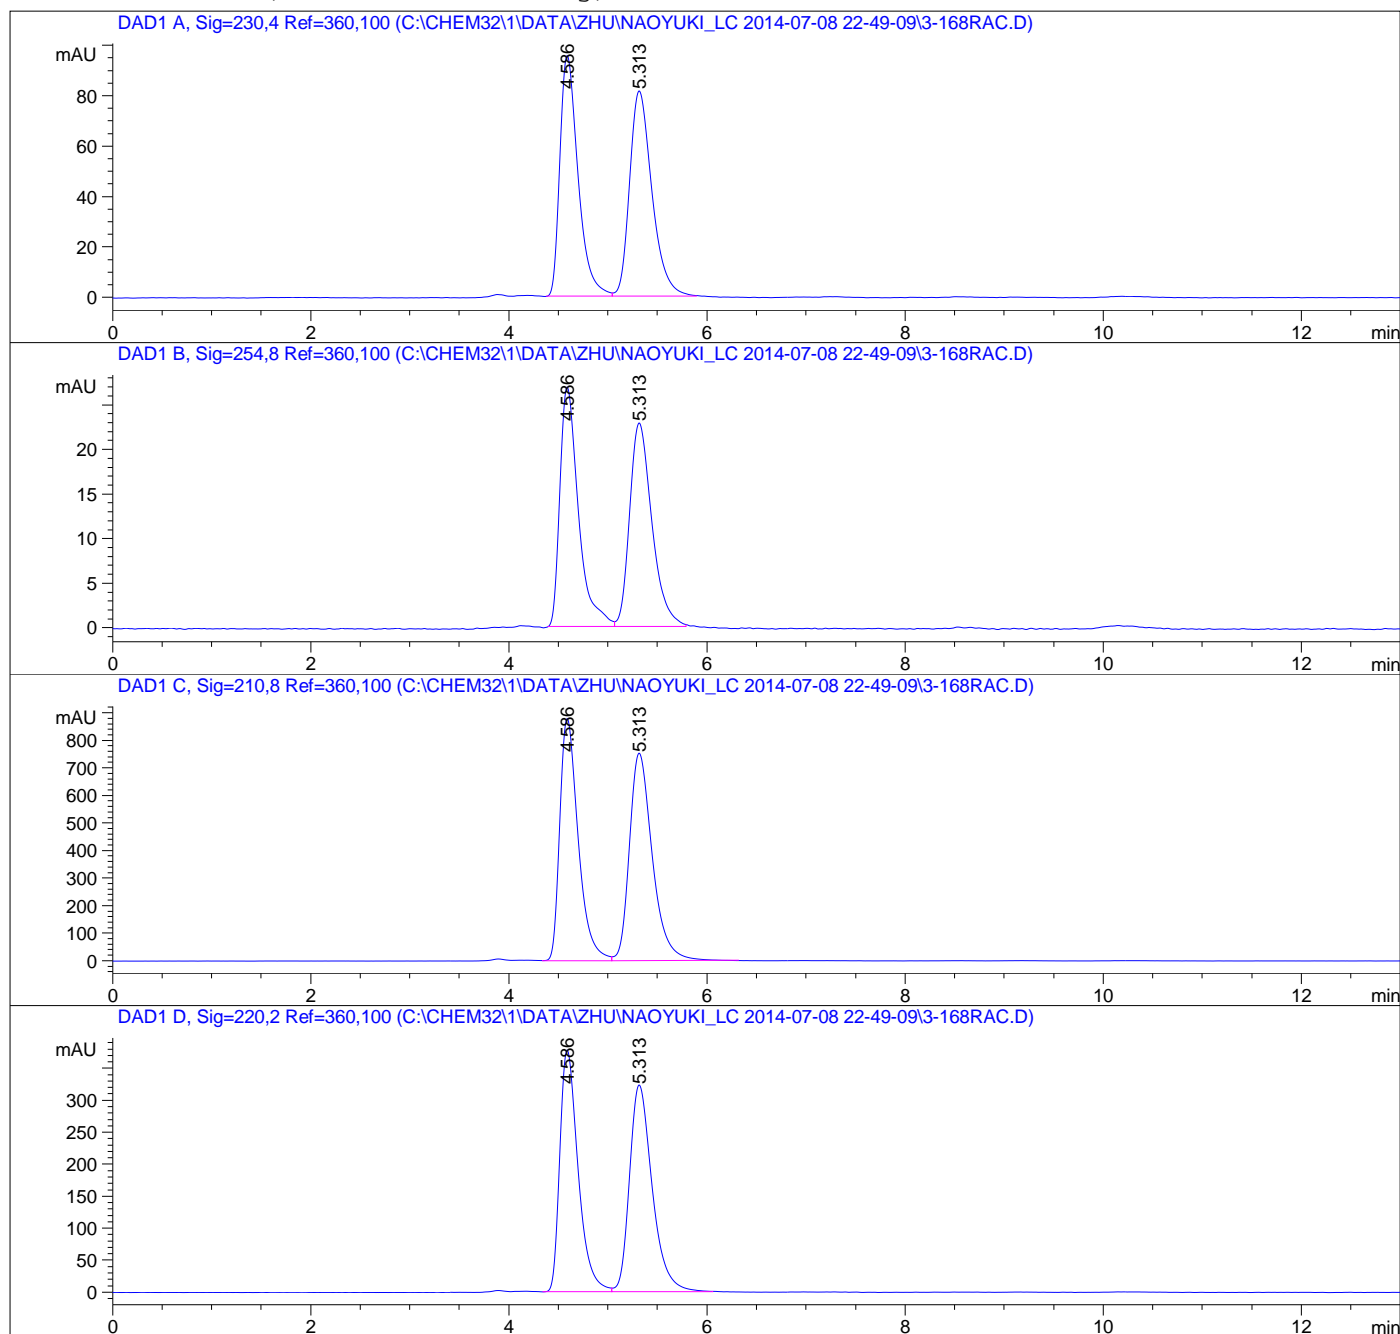

Data File C:\CHEM32\1\DATA\ZHU\NAOYUKI\_LC 2014-07-08 22-49-09\3-168RAC.D  
 Sample Name: 3-168RAC

=====  
 Area Percent Report  
 =====

Sorted By : Signal  
 Multiplier: : 1.0000  
 Dilution: : 1.0000  
 Use Multiplier & Dilution Factor with ISTDs

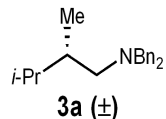

Signal 1: DAD1 A, Sig=230,4 Ref=360,100

| Peak # | RetTime [min] | Type | Width [min] | Area [mAU*s] | Height [mAU] | Area %  |
|--------|---------------|------|-------------|--------------|--------------|---------|
| 1      | 4.586         | BV   | 0.1948      | 1217.92639   | 95.52319     | 48.7915 |
| 2      | 5.313         | VB   | 0.2410      | 1278.25818   | 81.49140     | 51.2085 |

Totals : 2496.18457 177.01459

Signal 2: DAD1 B, Sig=254,8 Ref=360,100

| Peak # | RetTime [min] | Type | Width [min] | Area [mAU*s] | Height [mAU] | Area %  |
|--------|---------------|------|-------------|--------------|--------------|---------|
| 1      | 4.586         | BB   | 0.1978      | 349.63266    | 26.86418     | 49.4963 |
| 2      | 5.313         | BB   | 0.2383      | 356.74835    | 22.82956     | 50.5037 |

Totals : 706.38101 49.69374

Signal 3: DAD1 C, Sig=210,8 Ref=360,100

| Peak # | RetTime [min] | Type | Width [min] | Area [mAU*s] | Height [mAU] | Area %  |
|--------|---------------|------|-------------|--------------|--------------|---------|
| 1      | 4.586         | VV   | 0.1988      | 1.13734e4    | 879.84344    | 48.3933 |
| 2      | 5.313         | VB   | 0.2457      | 1.21286e4    | 753.93365    | 51.6067 |

Totals : 2.35020e4 1633.77710

Signal 4: DAD1 D, Sig=220,2 Ref=360,100

| Peak # | RetTime [min] | Type | Width [min] | Area [mAU*s] | Height [mAU] | Area %  |
|--------|---------------|------|-------------|--------------|--------------|---------|
| 1      | 4.586         | VV   | 0.1981      | 4871.03174   | 378.51334    | 48.5419 |
| 2      | 5.313         | VB   | 0.2442      | 5163.65527   | 323.61734    | 51.4581 |

Data File C:\CHEM32\1\DATA\ZHU\NAOYUKI\_LC 2014-07-08 22-49-09\4-180J3E.D

Sample Name: 4-180

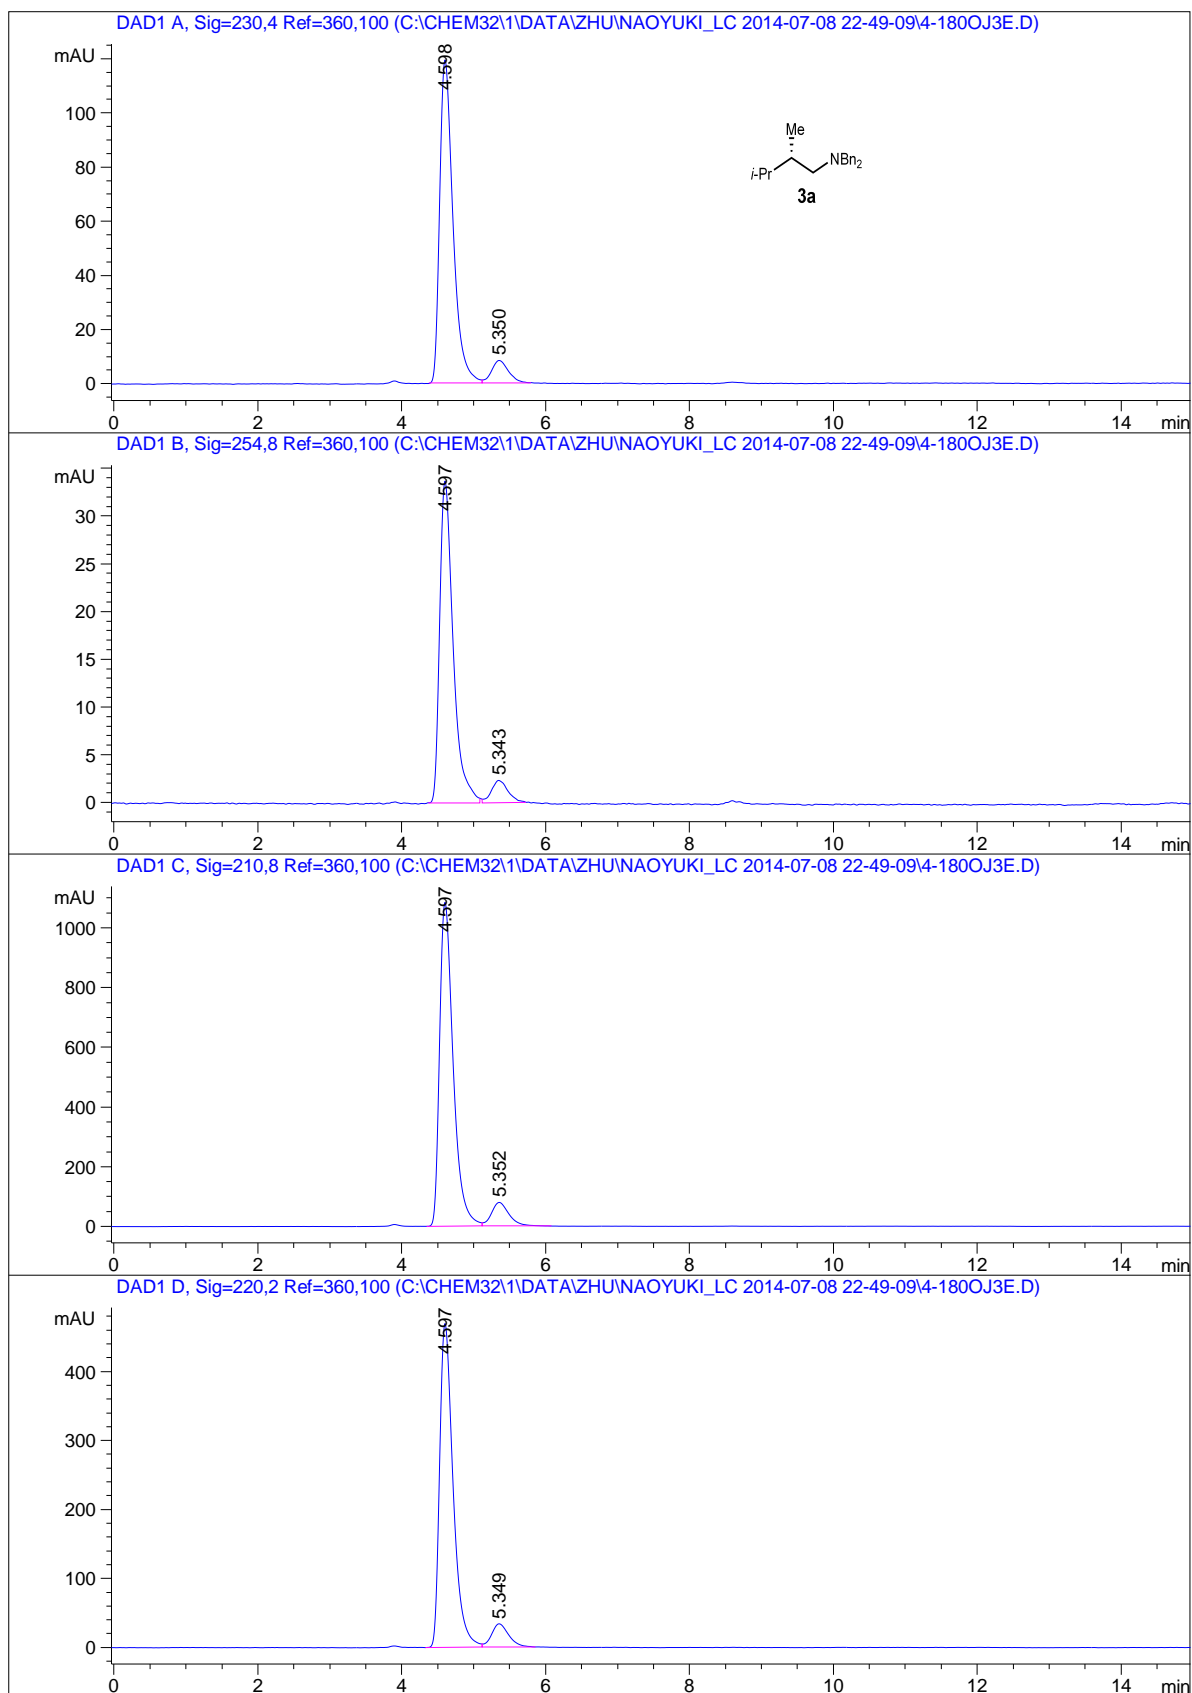

Data File C:\CHEM32\1\DATA\ZHU\NAOYUKI\_LC 2014-07-08 22-49-09\4-180J3E.D  
 Sample Name: 4-180

=====  
 Area Percent Report  
 =====

Sorted By : Signal  
 Multiplier: : 1.0000  
 Dilution: : 1.0000  
 Use Multiplier & Dilution Factor with ISTDs

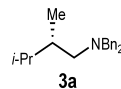

Signal 1: DAD1 A, Sig=230,4 Ref=360,100

| Peak # | RetTime [min] | Type | Width [min] | Area [mAU*s] | Height [mAU] | Area %  |
|--------|---------------|------|-------------|--------------|--------------|---------|
| 1      | 4.598         | BB   | 0.1988      | 1544.13879   | 119.46315    | 91.6981 |
| 2      | 5.350         | BB   | 0.2558      | 139.79808    | 8.41453      | 8.3019  |

Totals : 1683.93687 127.87768

Signal 2: DAD1 B, Sig=254,8 Ref=360,100

| Peak # | RetTime [min] | Type | Width [min] | Area [mAU*s] | Height [mAU] | Area %  |
|--------|---------------|------|-------------|--------------|--------------|---------|
| 1      | 4.597         | BB   | 0.1982      | 440.09738    | 33.73999     | 91.8887 |
| 2      | 5.343         | BB   | 0.2175      | 38.84876     | 2.36721      | 8.1113  |

Totals : 478.94614 36.10720

Signal 3: DAD1 C, Sig=210,8 Ref=360,100

| Peak # | RetTime [min] | Type | Width [min] | Area [mAU*s] | Height [mAU] | Area %  |
|--------|---------------|------|-------------|--------------|--------------|---------|
| 1      | 4.597         | BV   | 0.2010      | 1.42293e4    | 1085.31287   | 91.1047 |
| 2      | 5.352         | VB   | 0.2650      | 1389.31860   | 79.83940     | 8.8953  |

Totals : 1.56186e4 1165.15227

Signal 4: DAD1 D, Sig=220,2 Ref=360,100

| Peak # | RetTime [min] | Type | Width [min] | Area [mAU*s] | Height [mAU] | Area %  |
|--------|---------------|------|-------------|--------------|--------------|---------|
| 1      | 4.597         | BV   | 0.1997      | 6106.97266   | 469.66199    | 91.4629 |
| 2      | 5.349         | VB   | 0.2559      | 570.02472    | 33.94552     | 8.5371  |

Data File C:\CHEM32\1\DATA\ZHU\ZY 2014-09-06 13-20-28\4-233-2IA5ETOH.D

Sample Name: 4-233-2RAC

```

=====
Acq. Operator   : RZ                               Seq. Line :    9
Acq. Instrument : Instrument 1                     Location  : Vial 51
Injection Date  : 9/6/2014 4:44:16 PM             Inj       :    1
                                                    Inj Volume: 5 µl
Different Inj Volume from Sequence ! Actual Inj Volume : 2 µl
Acq. Method    : C:\CHEM32\1\DATA\ZHU\ZY 2014-09-06 13-20-28\05-30ETOH.M
Last changed   : 9/6/2014 5:05:27 PM by RZ
                (modified after loading)
Analysis Method: C:\CHEM32\1\METHODS\YMWHEXANES_PT8.M
Last changed   : 9/6/2014 5:50:51 PM by RZ
                (modified after loading)
  
```

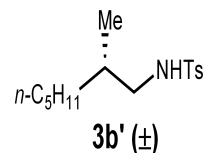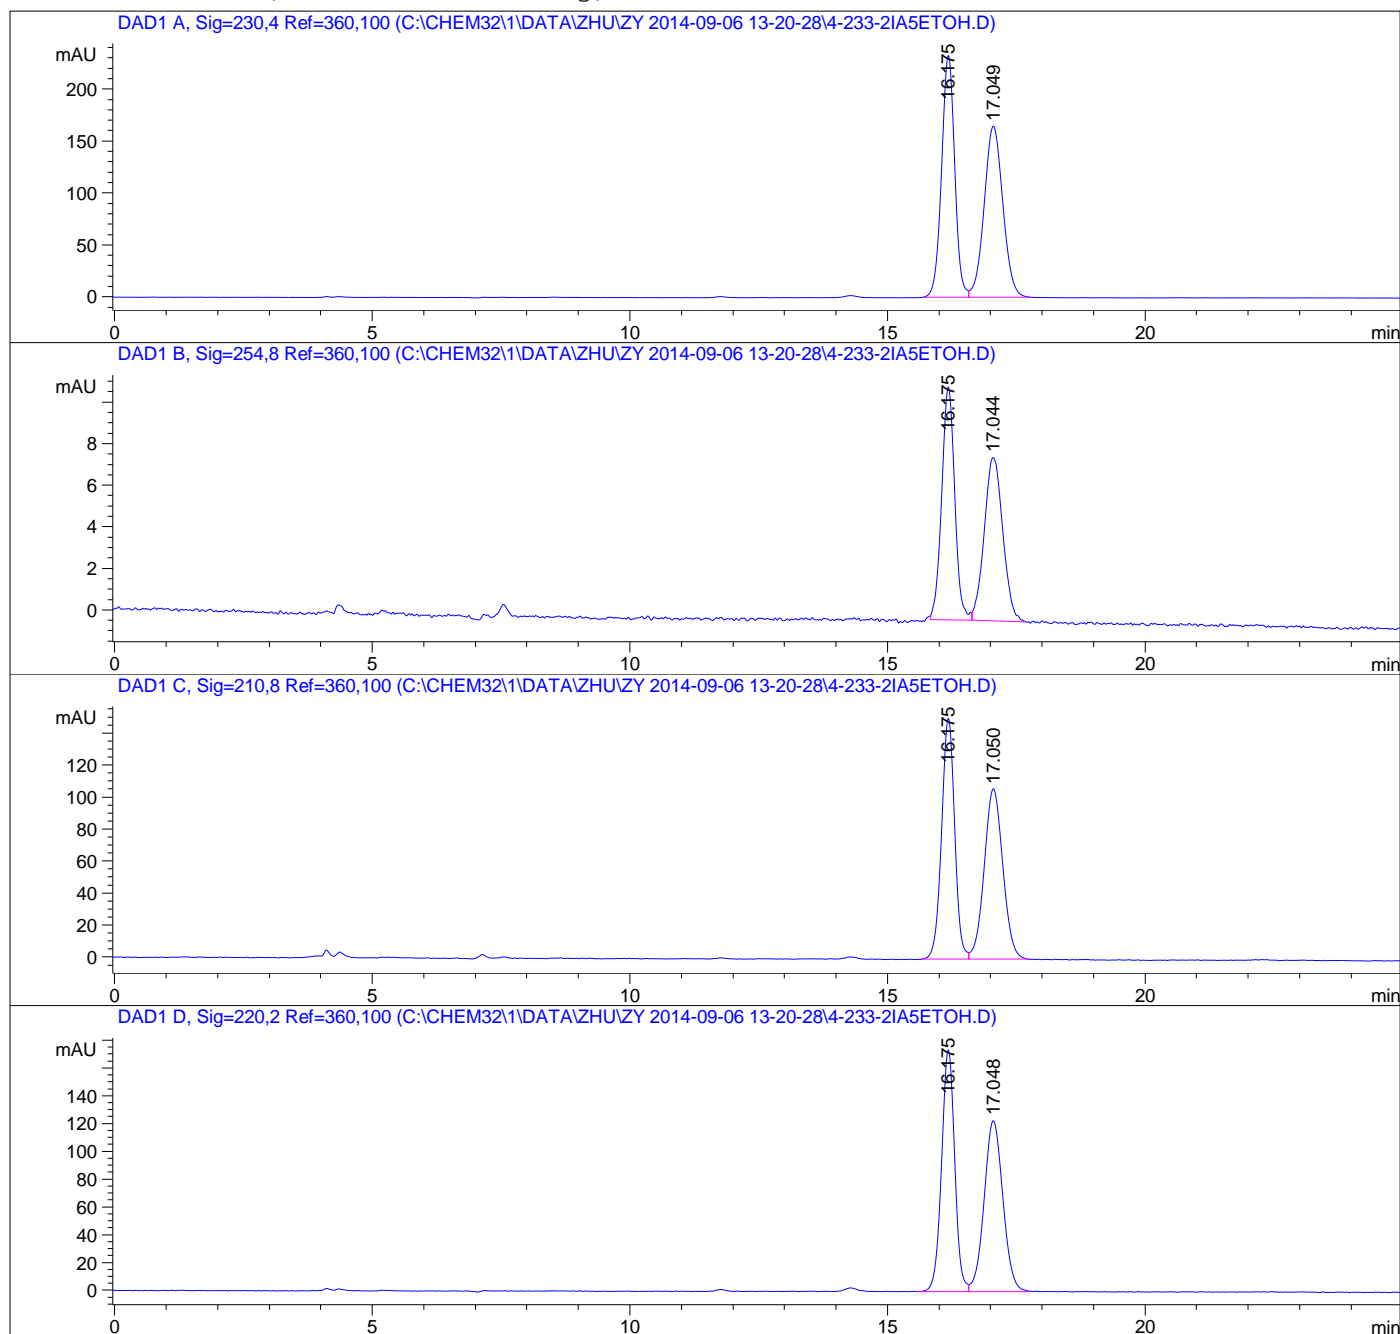

Data File C:\CHEM32\1\DATA\ZHU\ZY 2014-09-06 13-20-28\4-233-2IA5ETOH.D  
 Sample Name: 4-233-2RAC

=====  
 Area Percent Report  
 =====

Sorted By : Signal  
 Multiplier: : 1.0000  
 Dilution: : 1.0000  
 Use Multiplier & Dilution Factor with ISTDs

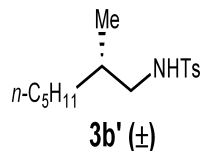

Signal 1: DAD1 A, Sig=230,4 Ref=360,100

| Peak # | RetTime [min] | Type | Width [min] | Area [mAU*s] | Height [mAU] | Area %  |
|--------|---------------|------|-------------|--------------|--------------|---------|
| 1      | 16.175        | BV   | 0.2766      | 4124.05078   | 232.91998    | 49.7222 |
| 2      | 17.049        | VB   | 0.3930      | 4170.12891   | 164.91818    | 50.2778 |

Totals : 8294.17969 397.83817

Signal 2: DAD1 B, Sig=254,8 Ref=360,100

| Peak # | RetTime [min] | Type | Width [min] | Area [mAU*s] | Height [mAU] | Area %  |
|--------|---------------|------|-------------|--------------|--------------|---------|
| 1      | 16.175        | BB   | 0.2740      | 198.06105    | 11.21591     | 50.1278 |
| 2      | 17.044        | BB   | 0.3262      | 197.05144    | 7.86900      | 49.8722 |

Totals : 395.11249 19.08491

Signal 3: DAD1 C, Sig=210,8 Ref=360,100

| Peak # | RetTime [min] | Type | Width [min] | Area [mAU*s] | Height [mAU] | Area %  |
|--------|---------------|------|-------------|--------------|--------------|---------|
| 1      | 16.175        | BV   | 0.2747      | 2667.59424   | 150.52965    | 49.7811 |
| 2      | 17.050        | VB   | 0.3904      | 2691.05884   | 106.65228    | 50.2189 |

Totals : 5358.65308 257.18192

Signal 4: DAD1 D, Sig=220,2 Ref=360,100

| Peak # | RetTime [min] | Type | Width [min] | Area [mAU*s] | Height [mAU] | Area %  |
|--------|---------------|------|-------------|--------------|--------------|---------|
| 1      | 16.175        | BV   | 0.2735      | 3093.13867   | 173.95059    | 49.7078 |
| 2      | 17.048        | VB   | 0.3924      | 3129.50830   | 123.16146    | 50.2922 |

Data File C:\CHEM32\1\DATA\ZHU\ZY 2014-09-06 13-20-28\4-236-2IA5ETOH.D  
 Sample Name: 4-236-2

```

=====
Acq. Operator   : RZ                               Seq. Line : 11
Acq. Instrument : Instrument 1                     Location  : Vial 52
Injection Date  : 9/6/2014 5:24:48 PM             Inj       : 1
                                                    Inj Volume: 5 µl
Different Inj Volume from Sequence ! Actual Inj Volume : 2 µl
Acq. Method     : C:\CHEM32\1\DATA\ZHU\ZY 2014-09-06 13-20-28\05-30ETOH.M
Last changed    : 9/6/2014 5:23:32 PM by RZ
                  (modified after loading)
Analysis Method : C:\CHEM32\1\METHODS\YMWHEXANES_PT8.M
Last changed    : 9/6/2014 5:50:51 PM by RZ
                  (modified after loading)
    
```

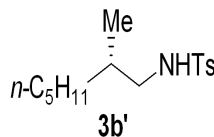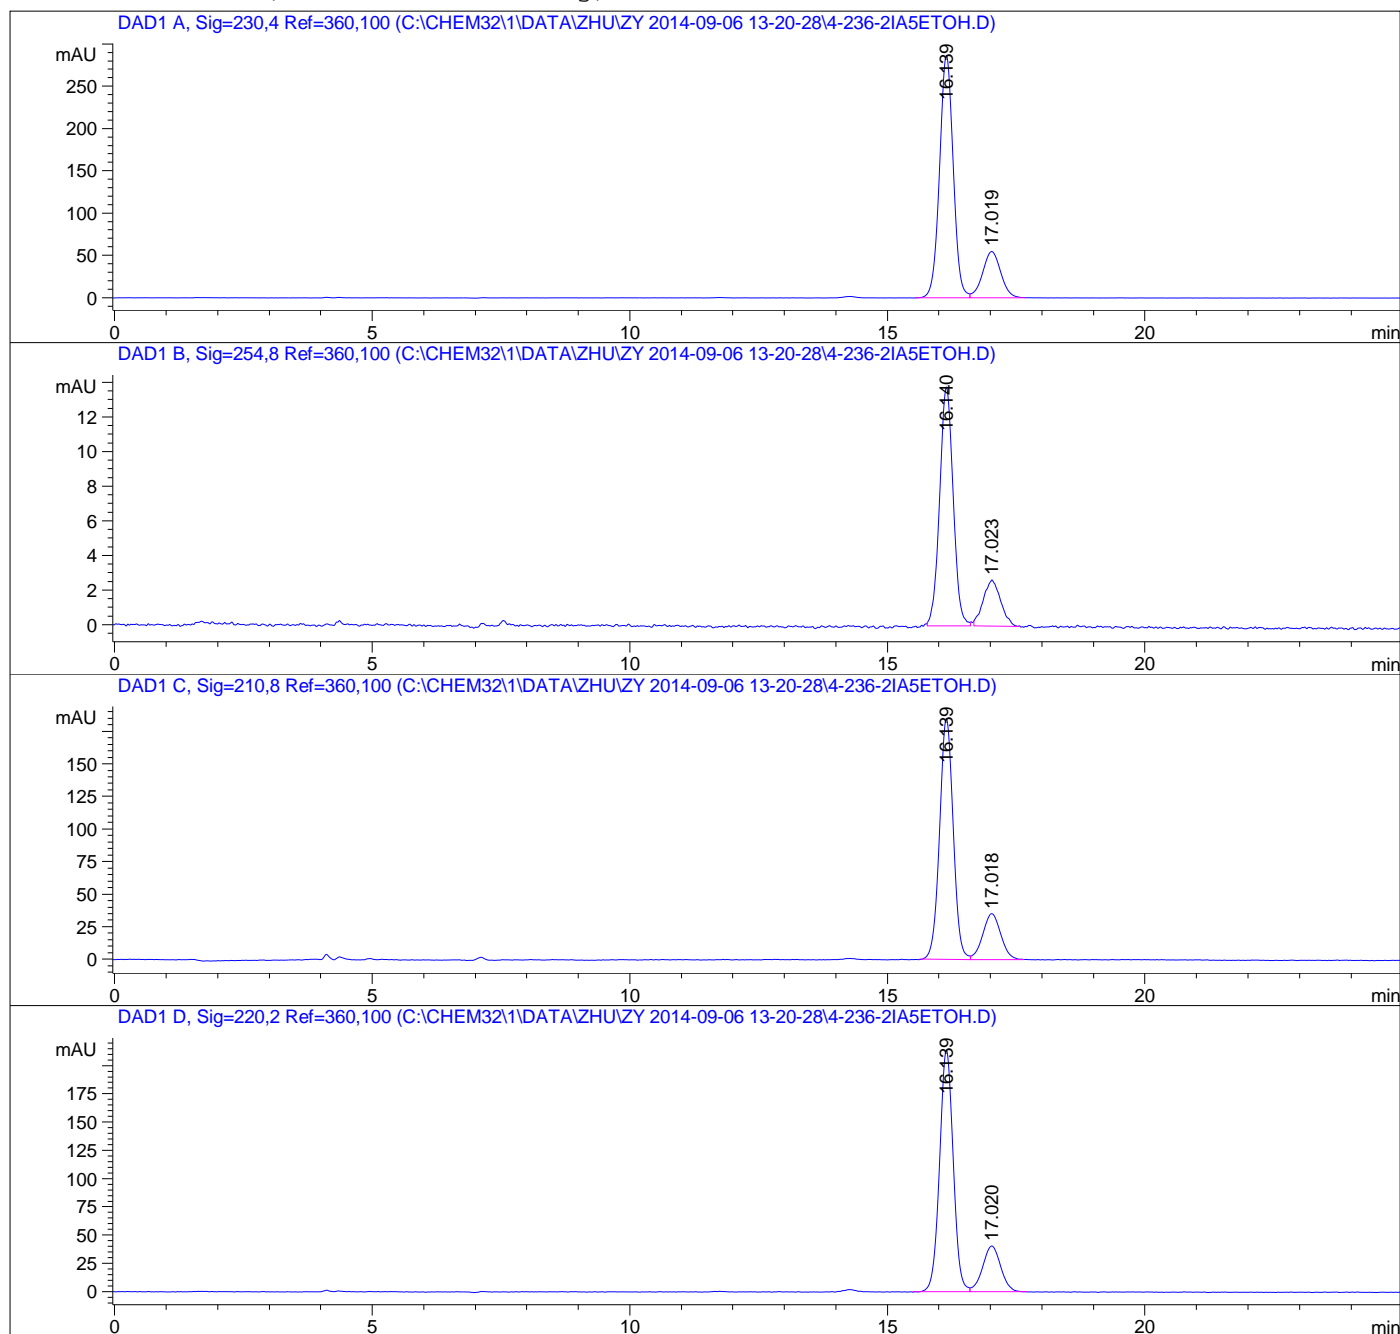

Data File C:\CHEM32\1\DATA\ZHU\ZY 2014-09-06 13-20-28\4-236-2IA5ETOH.D  
 Sample Name: 4-236-2

=====  
 Area Percent Report  
 =====

Sorted By : Signal  
 Multiplier: : 1.0000  
 Dilution: : 1.0000  
 Use Multiplier & Dilution Factor with ISTDs

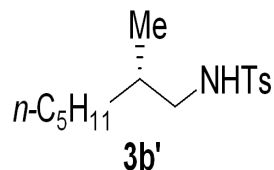

Signal 1: DAD1 A, Sig=230,4 Ref=360,100

| Peak # | RetTime [min] | Type | Width [min] | Area [mAU*s] | Height [mAU] | Area %  |
|--------|---------------|------|-------------|--------------|--------------|---------|
| 1      | 16.139        | BV   | 0.2870      | 5278.73145   | 286.49783    | 79.6739 |
| 2      | 17.019        | VB   | 0.3731      | 1346.68750   | 54.72157     | 20.3261 |

Totals : 6625.41895 341.21941

Signal 2: DAD1 B, Sig=254,8 Ref=360,100

| Peak # | RetTime [min] | Type | Width [min] | Area [mAU*s] | Height [mAU] | Area %  |
|--------|---------------|------|-------------|--------------|--------------|---------|
| 1      | 16.140        | BB   | 0.2773      | 252.45903    | 13.80713     | 79.8894 |
| 2      | 17.023        | BB   | 0.2895      | 63.55153     | 2.69117      | 20.1106 |

Totals : 316.01056 16.49830

Signal 3: DAD1 C, Sig=210,8 Ref=360,100

| Peak # | RetTime [min] | Type | Width [min] | Area [mAU*s] | Height [mAU] | Area %  |
|--------|---------------|------|-------------|--------------|--------------|---------|
| 1      | 16.139        | BV   | 0.2850      | 3410.14038   | 185.02925    | 79.7992 |
| 2      | 17.018        | VB   | 0.3655      | 863.25922    | 35.28019     | 20.2008 |

Totals : 4273.39960 220.30944

Signal 4: DAD1 D, Sig=220,2 Ref=360,100

| Peak # | RetTime [min] | Type | Width [min] | Area [mAU*s] | Height [mAU] | Area %  |
|--------|---------------|------|-------------|--------------|--------------|---------|
| 1      | 16.139        | VV   | 0.2852      | 3949.25146   | 214.12303    | 79.6812 |
| 2      | 17.020        | VB   | 0.3705      | 1007.06543   | 40.72775     | 20.3188 |



Data File C:\CHEM32\1\DATA\ZHU\NAOYUKI\_LC 2014-09-01 03-08-35\2-139OJH10ETOH.D

Sample Name: 2-139

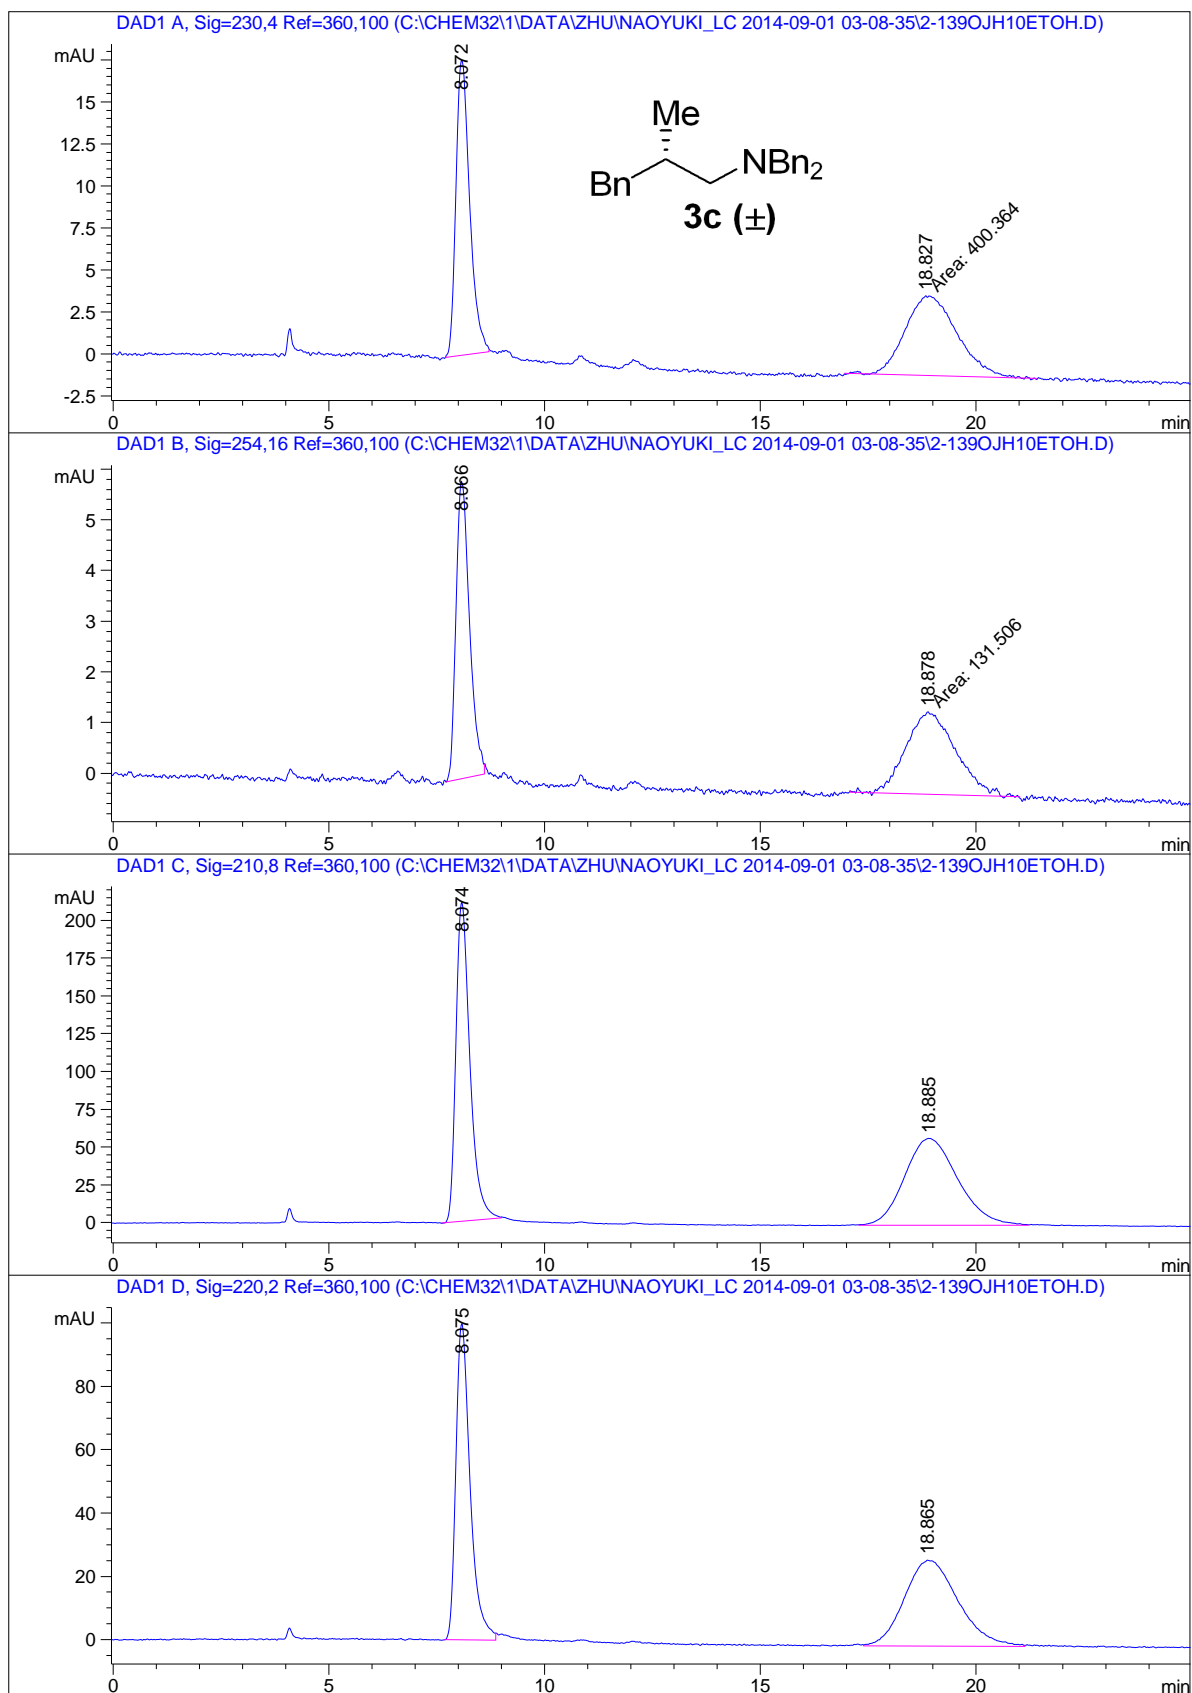

Data File C:\CHEM32\1\DATA\ZHU\NAOYUKI\_LC 2014-09-01 03-08-35\2-139OJH10ETOH.D  
 Sample Name: 2-139

=====  
 Area Percent Report  
 =====

Sorted By : Signal  
 Multiplier: : 1.0000  
 Dilution: : 1.0000  
 Use Multiplier & Dilution Factor with ISTDs

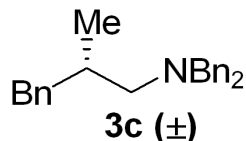

Signal 1: DAD1 A, Sig=230,4 Ref=360,100

| Peak # | RetTime [min] | Type | Width [min] | Area [mAU*s] | Height [mAU] | Area %  |
|--------|---------------|------|-------------|--------------|--------------|---------|
| 1      | 8.072         | BB   | 0.3179      | 391.85367    | 17.59256     | 49.4629 |
| 2      | 18.827        | MM   | 1.4010      | 400.36371    | 4.76289      | 50.5371 |

Totals : 792.21738 22.35545

Signal 2: DAD1 B, Sig=254,16 Ref=360,100

| Peak # | RetTime [min] | Type | Width [min] | Area [mAU*s] | Height [mAU] | Area %  |
|--------|---------------|------|-------------|--------------|--------------|---------|
| 1      | 8.066         | BB   | 0.3285      | 128.04208    | 5.86973      | 49.3326 |
| 2      | 18.878        | MM   | 1.3420      | 131.50638    | 1.63320      | 50.6674 |

Totals : 259.54846 7.50294

Signal 3: DAD1 C, Sig=210,8 Ref=360,100

| Peak # | RetTime [min] | Type | Width [min] | Area [mAU*s] | Height [mAU] | Area %  |
|--------|---------------|------|-------------|--------------|--------------|---------|
| 1      | 8.074         | VB   | 0.3448      | 4790.39990   | 211.05370    | 49.0759 |
| 2      | 18.885        | BB   | 1.0135      | 4970.79736   | 57.67714     | 50.9241 |

Totals : 9761.19727 268.73083

Signal 4: DAD1 D, Sig=220,2 Ref=360,100

| Peak # | RetTime [min] | Type | Width [min] | Area [mAU*s] | Height [mAU] | Area %  |
|--------|---------------|------|-------------|--------------|--------------|---------|
| 1      | 8.075         | BB   | 0.3504      | 2300.24902   | 99.98483     | 49.4284 |
| 2      | 18.865        | VV   | 1.0213      | 2353.45264   | 27.20514     | 50.5716 |

Data File C:\CHEM32\1\DATA\ZHU\NAOYUKI\_LC 2014-09-01 03-08-35\4-2700JH10ETOH.D

Sample Name: 4-270

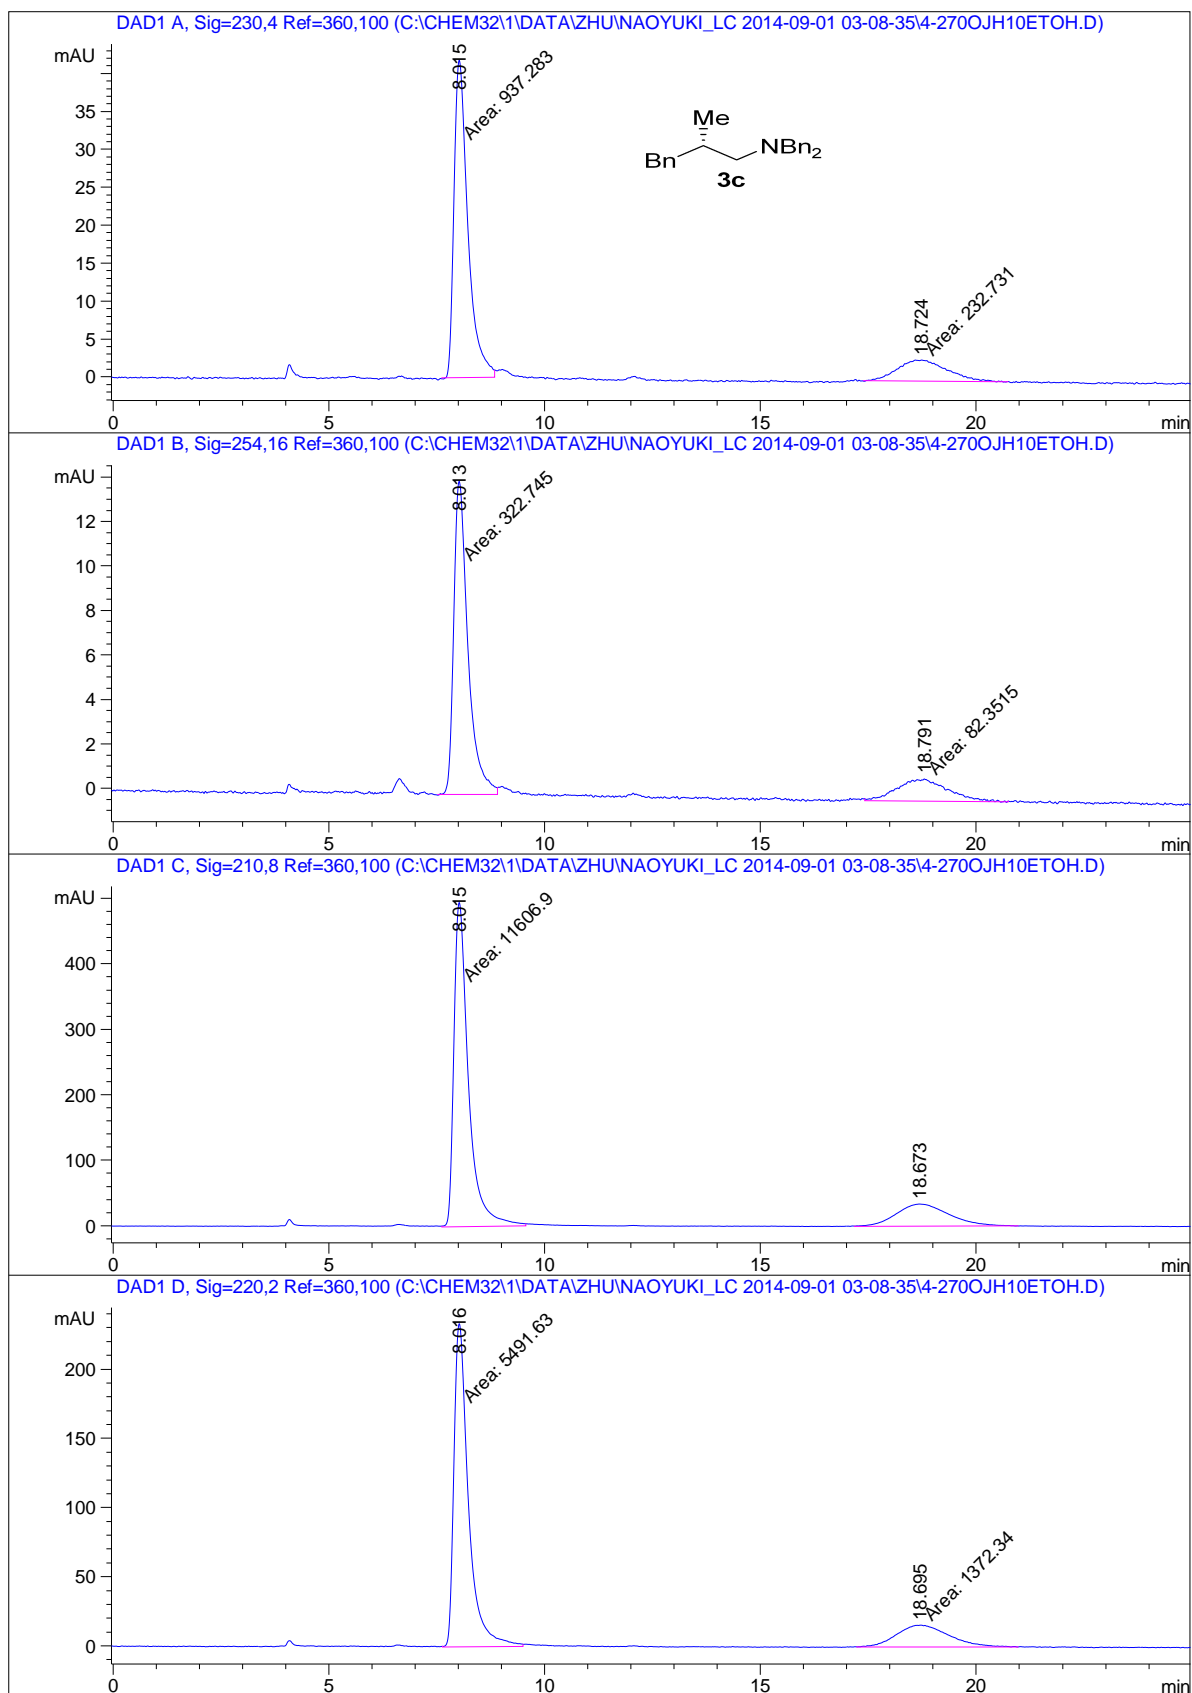

Data File C:\CHEM32\1\DATA\ZHU\NAOYUKI\_LC 2014-09-01 03-08-35\4-2700JH10ETOH.D  
 Sample Name: 4-270

=====  
 Area Percent Report  
 =====

Sorted By : Signal  
 Multiplier: : 1.0000  
 Dilution: : 1.0000  
 Use Multiplier & Dilution Factor with ISTDs

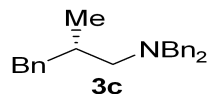

Signal 1: DAD1 A, Sig=230,4 Ref=360,100

| Peak # | RetTime [min] | Type | Width [min] | Area [mAU*s] | Height [mAU] | Area %  |
|--------|---------------|------|-------------|--------------|--------------|---------|
| 1      | 8.015         | MF   | 0.3730      | 937.28253    | 41.88021     | 80.1087 |
| 2      | 18.724        | MM   | 1.3706      | 232.73138    | 2.82997      | 19.8913 |

Totals : 1170.01392 44.71018

Signal 2: DAD1 B, Sig=254,16 Ref=360,100

| Peak # | RetTime [min] | Type | Width [min] | Area [mAU*s] | Height [mAU] | Area %  |
|--------|---------------|------|-------------|--------------|--------------|---------|
| 1      | 8.013         | MF   | 0.3818      | 322.74484    | 14.08981     | 79.6711 |
| 2      | 18.791        | FM   | 1.3685      | 82.35146     | 1.00292      | 20.3289 |

Totals : 405.09631 15.09272

Signal 3: DAD1 C, Sig=210,8 Ref=360,100

| Peak # | RetTime [min] | Type | Width [min] | Area [mAU*s] | Height [mAU] | Area %  |
|--------|---------------|------|-------------|--------------|--------------|---------|
| 1      | 8.015         | MM   | 0.3905      | 1.16069e4    | 495.32748    | 80.0140 |
| 2      | 18.673        | VV   | 1.0088      | 2899.17065   | 33.93070     | 19.9860 |

Totals : 1.45060e4 529.25819

Signal 4: DAD1 D, Sig=220,2 Ref=360,100

| Peak # | RetTime [min] | Type | Width [min] | Area [mAU*s] | Height [mAU] | Area %  |
|--------|---------------|------|-------------|--------------|--------------|---------|
| 1      | 8.016         | MM   | 0.3912      | 5491.62939   | 233.97594    | 80.0066 |
| 2      | 18.695        | MM   | 1.4375      | 1372.34155   | 15.91173     | 19.9934 |

Data File C:\CHEM32\1\DATA\ZHU\ZY 2014-09-08 15-19-25\4-276-2IC10.D

Sample Name: 4-276-2RAC

```

=====
Acq. Operator   : TL                      Seq. Line : 14
Acq. Instrument : Instrument 1             Location  : Vial 51
Injection Date  : 9/8/2014 8:16:26 PM    Inj       : 1
                                           Inj Volume: 5 µl
Different Inj Volume from Sequence !    Actual Inj Volume : 3 µl
Acq. Method     : C:\CHEM32\1\DATA\ZHU\ZY 2014-09-08 15-19-25\10-60.M
Last changed    : 9/8/2014 8:45:55 PM by TL
                  (modified after loading)
Analysis Method : C:\CHEM32\1\METHODS\YMWHEXANES_PT8.M
Last changed    : 9/6/2014 5:50:51 PM by RZ
                  (modified after loading)
    
```

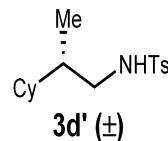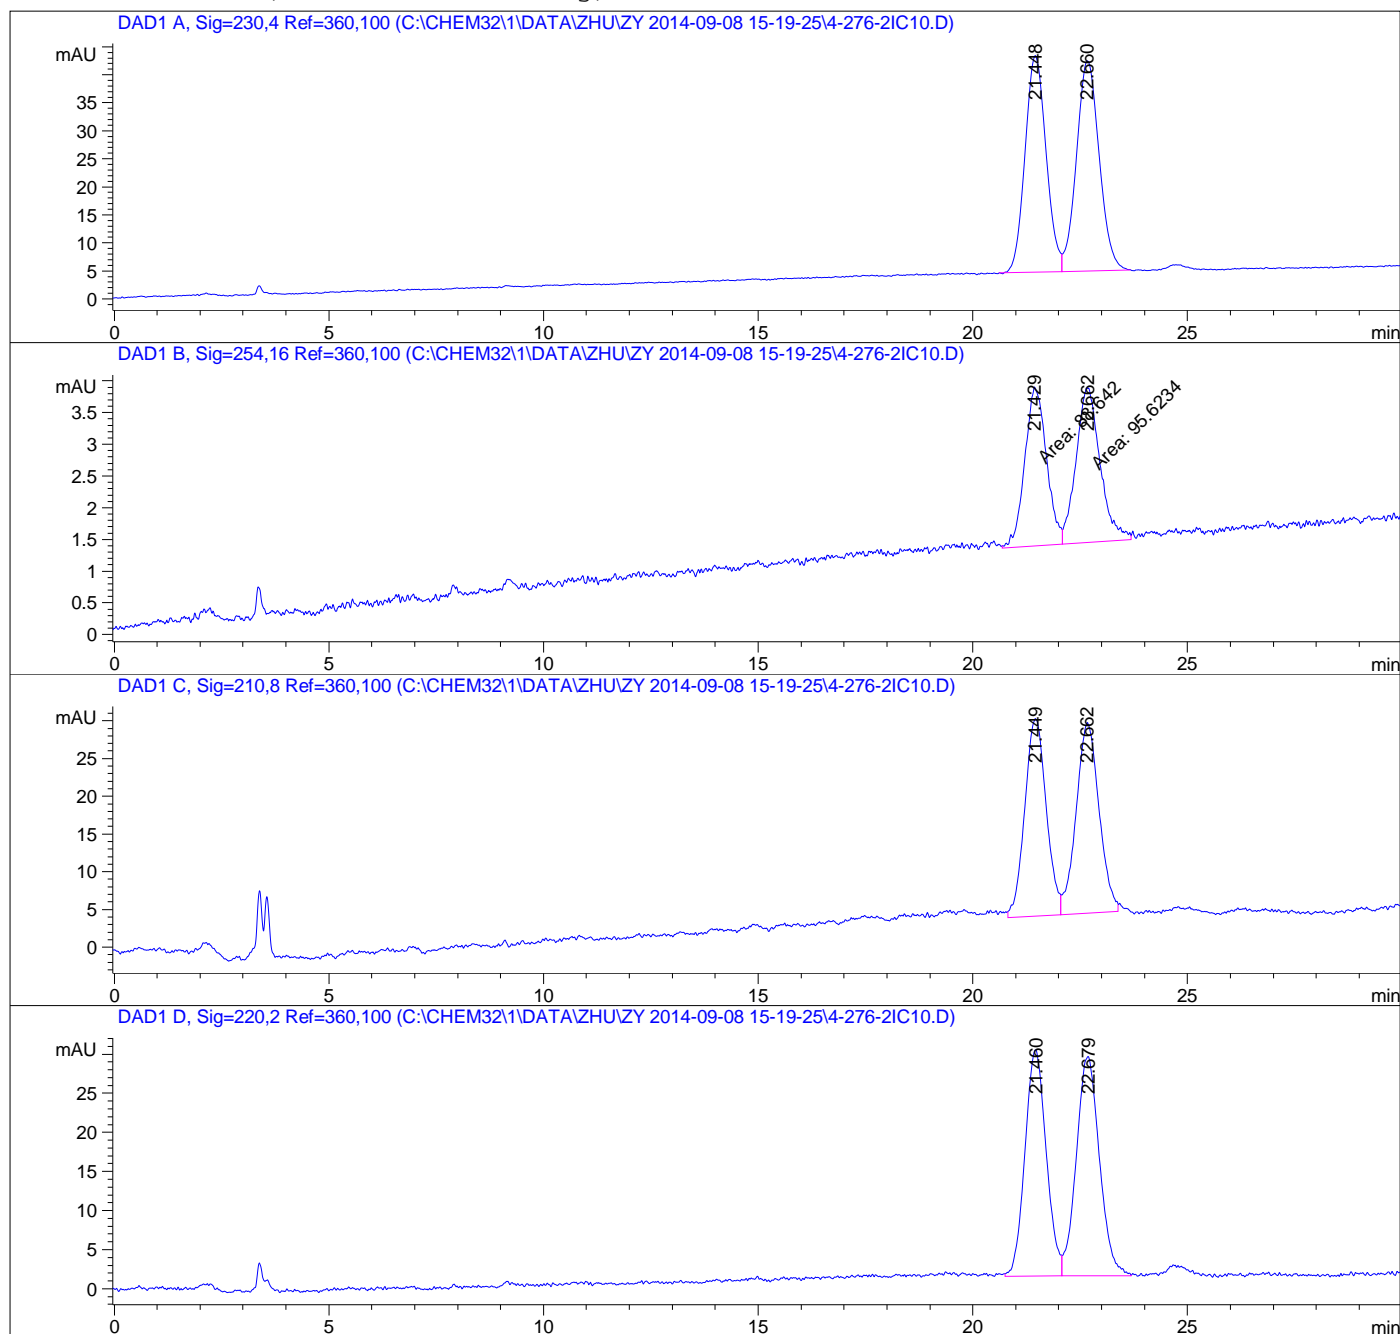

Data File C:\CHEM32\1\DATA\ZHU\ZY 2014-09-08 15-19-25\4-276-2IC10.D  
 Sample Name: 4-276-2RAC

=====  
 Area Percent Report  
 =====

Sorted By : Signal  
 Multiplier: : 1.0000  
 Dilution: : 1.0000  
 Use Multiplier & Dilution Factor with ISTDs

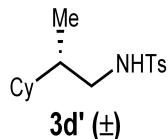

Signal 1: DAD1 A, Sig=230,4 Ref=360,100

| Peak # | RetTime [min] | Type | Width [min] | Area [mAU*s] | Height [mAU] | Area %  |
|--------|---------------|------|-------------|--------------|--------------|---------|
| 1      | 21.448        | BV   | 0.5012      | 1323.96375   | 38.68881     | 48.8469 |
| 2      | 22.660        | VB   | 0.5269      | 1386.47290   | 37.54266     | 51.1531 |

Totals : 2710.43665 76.23147

Signal 2: DAD1 B, Sig=254,16 Ref=360,100

| Peak # | RetTime [min] | Type | Width [min] | Area [mAU*s] | Height [mAU] | Area %  |
|--------|---------------|------|-------------|--------------|--------------|---------|
| 1      | 21.429        | MF   | 0.5877      | 88.64199     | 2.51401      | 48.1056 |
| 2      | 22.662        | FM   | 0.6513      | 95.62343     | 2.44697      | 51.8944 |

Totals : 184.26542 4.96098

Signal 3: DAD1 C, Sig=210,8 Ref=360,100

| Peak # | RetTime [min] | Type | Width [min] | Area [mAU*s] | Height [mAU] | Area %  |
|--------|---------------|------|-------------|--------------|--------------|---------|
| 1      | 21.449        | BV   | 0.4190      | 914.99231    | 26.22897     | 49.3110 |
| 2      | 22.662        | VV   | 0.4455      | 940.56134    | 25.31572     | 50.6890 |

Totals : 1855.55365 51.54469

Signal 4: DAD1 D, Sig=220,2 Ref=360,100

| Peak # | RetTime [min] | Type | Width [min] | Area [mAU*s] | Height [mAU] | Area %  |
|--------|---------------|------|-------------|--------------|--------------|---------|
| 1      | 21.460        | BV   | 0.4477      | 1001.33923   | 28.93911     | 48.6819 |
| 2      | 22.679        | VV   | 0.4664      | 1055.56177   | 28.09043     | 51.3181 |

Data File C:\CHEM32\1\DATA\ZHU\ZY 2014-09-08 15-19-25\4-277-2IC10.D

Sample Name: 4-277-2

```

=====
Acq. Operator   : TL                               Seq. Line : 16
Acq. Instrument : Instrument 1                     Location  : Vial 52
Injection Date  : 9/8/2014 9:08:23 PM             Inj       : 1
                                                    Inj Volume: 5 µl
Different Inj Volume from Sequence ! Actual Inj Volume : 3 µl
Acq. Method    : C:\CHEM32\1\DATA\ZHU\ZY 2014-09-08 15-19-25\10-60.M
Last changed   : 9/8/2014 9:07:24 PM by TL
                (modified after loading)
Analysis Method: C:\CHEM32\1\METHODS\YMWHEXANES_PT8.M
Last changed   : 9/6/2014 5:50:51 PM by RZ
                (modified after loading)
    
```

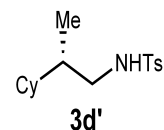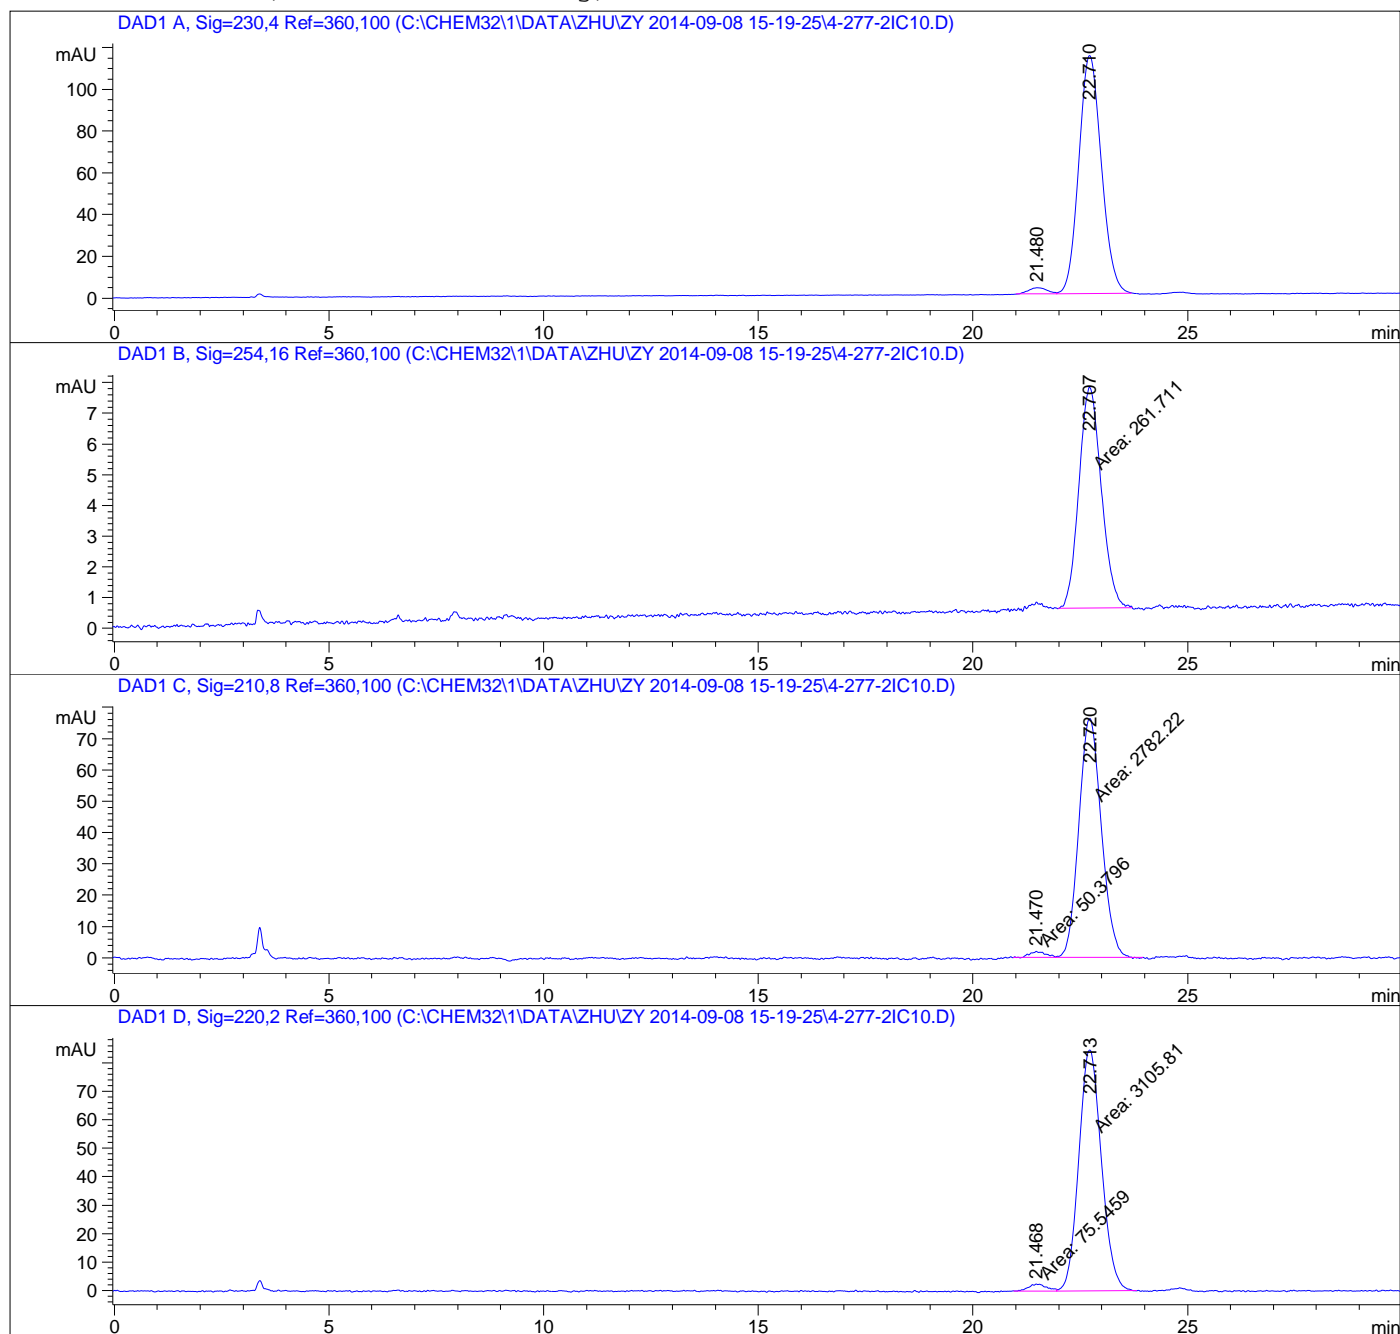

Data File C:\CHEM32\1\DATA\ZHU\ZY 2014-09-08 15-19-25\4-277-2IC10.D  
 Sample Name: 4-277-2

=====  
 Area Percent Report  
 =====

Sorted By : Signal  
 Multiplier: : 1.0000  
 Dilution: : 1.0000  
 Use Multiplier & Dilution Factor with ISTDs

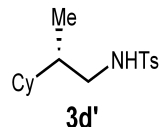

Signal 1: DAD1 A, Sig=230,4 Ref=360,100

| Peak # | RetTime [min] | Type | Width [min] | Area [mAU*s] | Height [mAU] | Area %  |
|--------|---------------|------|-------------|--------------|--------------|---------|
| 1      | 21.480        | BV   | 0.3713      | 94.56521     | 3.03636      | 2.2150  |
| 2      | 22.710        | VB   | 0.5526      | 4174.69287   | 114.16002    | 97.7850 |

Totals : 4269.25808 117.19638

Signal 2: DAD1 B, Sig=254,16 Ref=360,100

| Peak # | RetTime [min] | Type | Width [min] | Area [mAU*s] | Height [mAU] | Area %   |
|--------|---------------|------|-------------|--------------|--------------|----------|
| 1      | 22.707        | FM   | 0.6052      | 261.71143    | 7.20776      | 100.0000 |

Totals : 261.71143 7.20776

Signal 3: DAD1 C, Sig=210,8 Ref=360,100

| Peak # | RetTime [min] | Type | Width [min] | Area [mAU*s] | Height [mAU] | Area %  |
|--------|---------------|------|-------------|--------------|--------------|---------|
| 1      | 21.470        | MF   | 0.4297      | 50.37959     | 1.95393      | 1.7786  |
| 2      | 22.720        | FM   | 0.6080      | 2782.22314   | 76.26334     | 98.2214 |

Totals : 2832.60273 78.21726

Signal 4: DAD1 D, Sig=220,2 Ref=360,100

| Peak # | RetTime [min] | Type | Width [min] | Area [mAU*s] | Height [mAU] | Area %  |
|--------|---------------|------|-------------|--------------|--------------|---------|
| 1      | 21.468        | MF   | 0.5020      | 75.54588     | 2.50806      | 2.3746  |
| 2      | 22.713        | FM   | 0.6118      | 3105.80957   | 84.60500     | 97.6254 |



Data File C:\CHEM32\1\DATA\ZHU\HPLC 2014-02-17 18-01-24\SZ2-165-2IC10.D

Sample Name: SZ2-165-2RAC

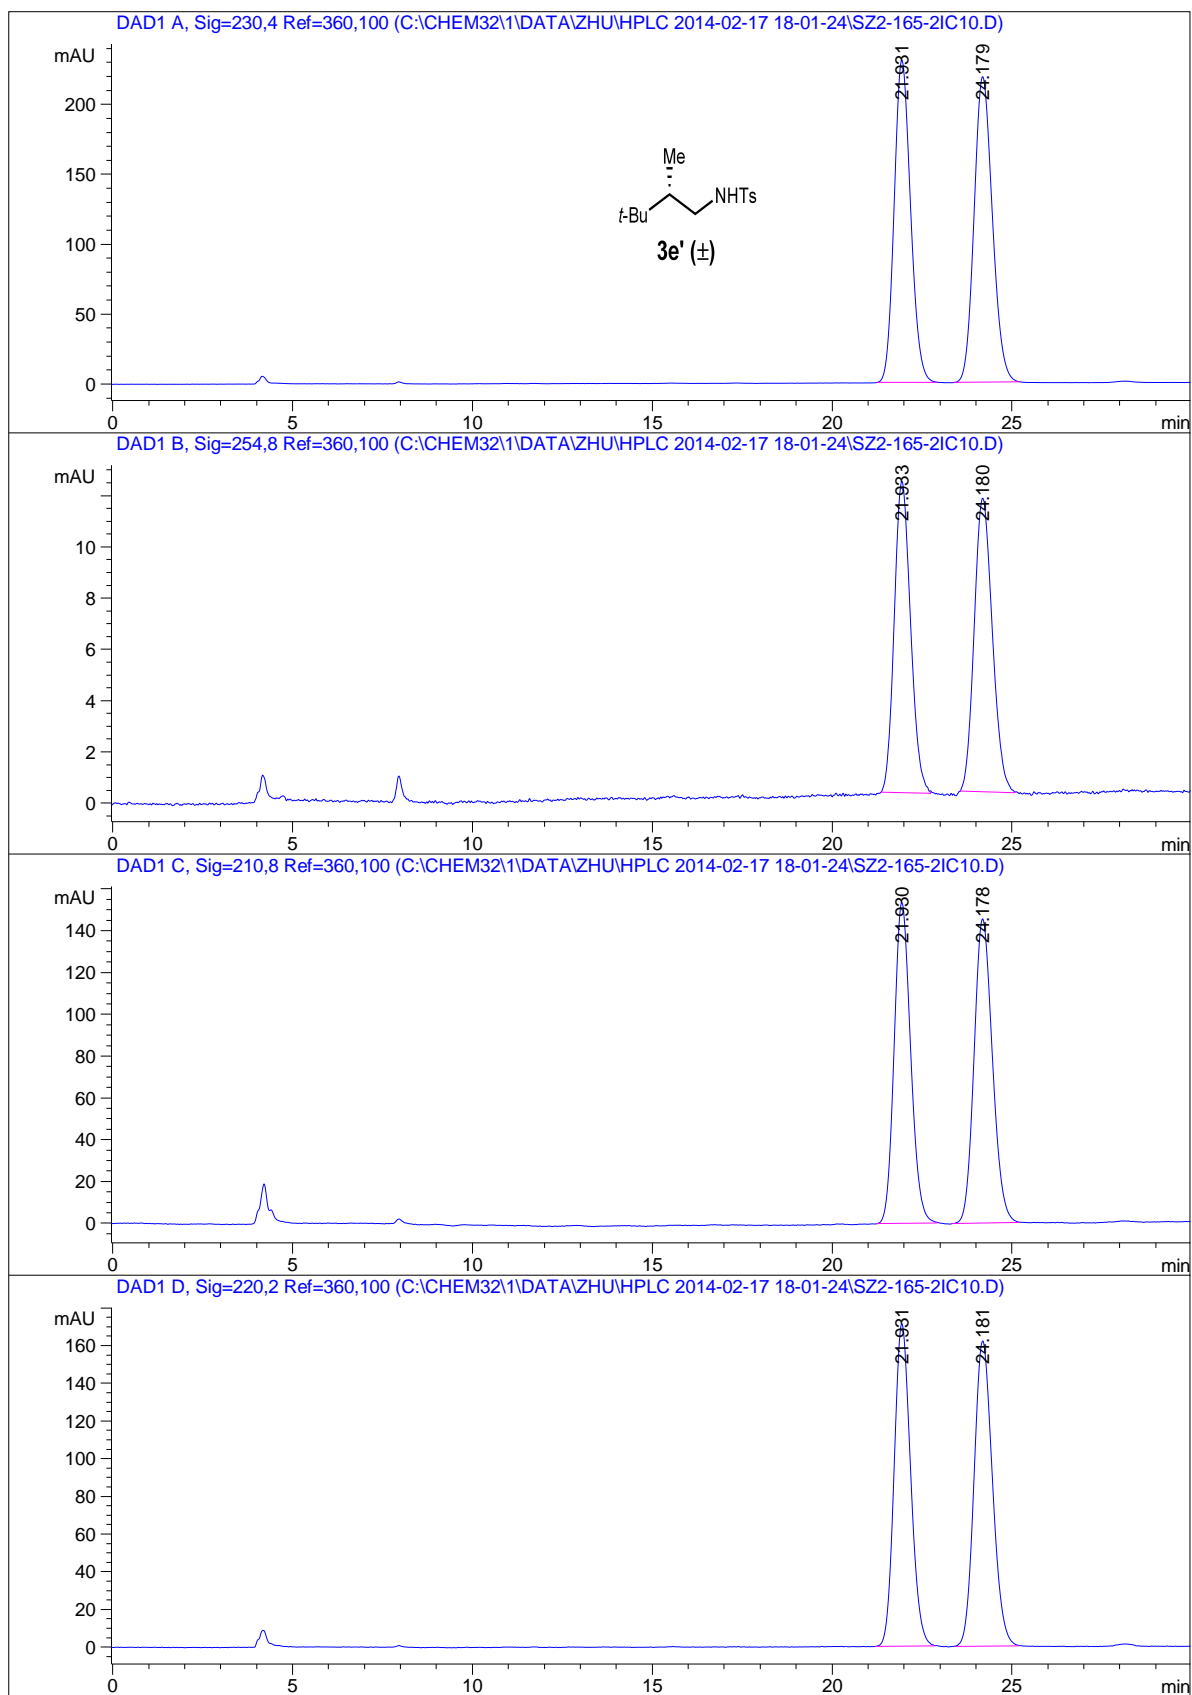

Data File C:\CHEM32\1\DATA\ZHU\HPLC 2014-02-17 18-01-24\SZ2-165-2IC10.D  
 Sample Name: SZ2-165-2RAC

=====  
 Area Percent Report  
 =====

Sorted By : Signal  
 Multiplier: : 1.0000  
 Dilution: : 1.0000  
 Use Multiplier & Dilution Factor with ISTDs

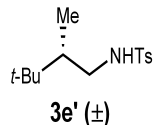

Signal 1: DAD1 A, Sig=230,4 Ref=360,100

| Peak # | RetTime [min] | Type | Width [min] | Area [mAU*s] | Height [mAU] | Area %  |
|--------|---------------|------|-------------|--------------|--------------|---------|
| 1      | 21.931        | BB   | 0.4882      | 7317.35791   | 230.62767    | 48.5844 |
| 2      | 24.179        | BB   | 0.5471      | 7743.75879   | 218.70587    | 51.4156 |

Totals : 1.50611e4 449.33354

Signal 2: DAD1 B, Sig=254,8 Ref=360,100

| Peak # | RetTime [min] | Type | Width [min] | Area [mAU*s] | Height [mAU] | Area %  |
|--------|---------------|------|-------------|--------------|--------------|---------|
| 1      | 21.933        | BB   | 0.4562      | 383.48392    | 12.15179     | 48.8088 |
| 2      | 24.180        | BB   | 0.4471      | 402.20132    | 11.47009     | 51.1912 |

Totals : 785.68524 23.62188

Signal 3: DAD1 C, Sig=210,8 Ref=360,100

| Peak # | RetTime [min] | Type | Width [min] | Area [mAU*s] | Height [mAU] | Area %  |
|--------|---------------|------|-------------|--------------|--------------|---------|
| 1      | 21.930        | BB   | 0.4915      | 4891.11475   | 153.60268    | 48.6653 |
| 2      | 24.178        | BB   | 0.5314      | 5159.40088   | 145.61386    | 51.3347 |

Totals : 1.00505e4 299.21654

Signal 4: DAD1 D, Sig=220,2 Ref=360,100

| Peak # | RetTime [min] | Type | Width [min] | Area [mAU*s] | Height [mAU] | Area %  |
|--------|---------------|------|-------------|--------------|--------------|---------|
| 1      | 21.931        | BB   | 0.4966      | 5437.40967   | 171.18584    | 48.6119 |
| 2      | 24.181        | BB   | 0.5380      | 5747.94189   | 161.99554    | 51.3881 |

Data File C:\CHEM32\1\DATA\ZHU\HPLC 2014-02-17 18-01-24\SZ3-174-2IC10.D

Sample Name: SZ3-174-2

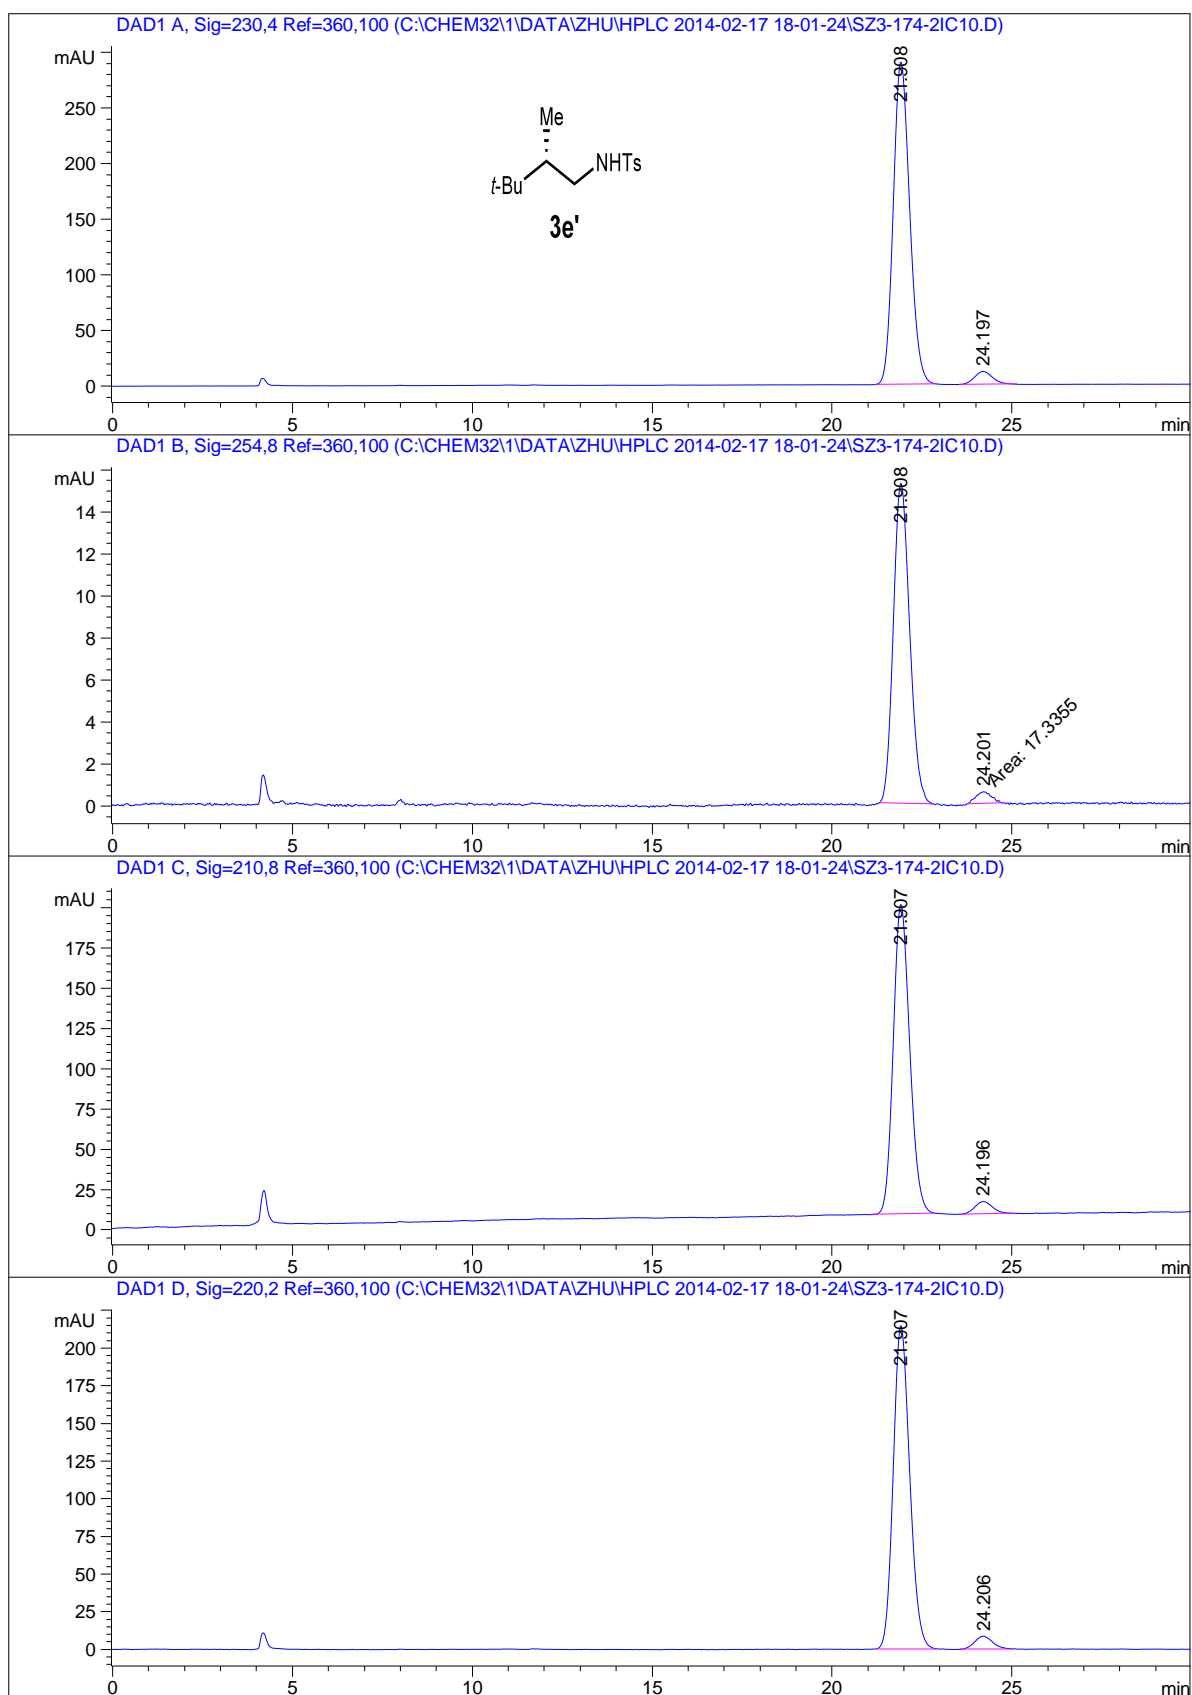

Data File C:\CHEM32\1\DATA\ZHU\HPLC 2014-02-17 18-01-24\SZ3-174-2IC10.D  
 Sample Name: SZ3-174-2

=====  
 Area Percent Report  
 =====

Sorted By : Signal  
 Multiplier: : 1.0000  
 Dilution: : 1.0000  
 Use Multiplier & Dilution Factor with ISTDs

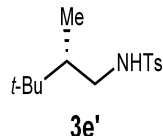

Signal 1: DAD1 A, Sig=230,4 Ref=360,100

| Peak # | RetTime [min] | Type | Width [min] | Area [mAU*s] | Height [mAU] | Area %  |
|--------|---------------|------|-------------|--------------|--------------|---------|
| 1      | 21.908        | BB   | 0.4915      | 9219.32715   | 289.50287    | 95.6801 |
| 2      | 24.197        | BB   | 0.4645      | 416.24762    | 11.66099     | 4.3199  |

Totals : 9635.57477 301.16386

Signal 2: DAD1 B, Sig=254,8 Ref=360,100

| Peak # | RetTime [min] | Type | Width [min] | Area [mAU*s] | Height [mAU] | Area %  |
|--------|---------------|------|-------------|--------------|--------------|---------|
| 1      | 21.908        | BB   | 0.4311      | 481.52094    | 15.21877     | 96.5250 |
| 2      | 24.201        | MM   | 0.5116      | 17.33550     | 5.64694e-1   | 3.4750  |

Totals : 498.85644 15.78346

Signal 3: DAD1 C, Sig=210,8 Ref=360,100

| Peak # | RetTime [min] | Type | Width [min] | Area [mAU*s] | Height [mAU] | Area %  |
|--------|---------------|------|-------------|--------------|--------------|---------|
| 1      | 21.907        | BB   | 0.4996      | 6119.29785   | 192.13991    | 95.8429 |
| 2      | 24.196        | BB   | 0.4208      | 265.41943    | 7.68719      | 4.1571  |

Totals : 6384.71729 199.82709

Signal 4: DAD1 D, Sig=220,2 Ref=360,100

| Peak # | RetTime [min] | Type | Width [min] | Area [mAU*s] | Height [mAU] | Area %  |
|--------|---------------|------|-------------|--------------|--------------|---------|
| 1      | 21.907        | BB   | 0.4838      | 6841.97510   | 214.69519    | 95.7099 |
| 2      | 24.206        | BV   | 0.4340      | 306.68539    | 8.68374      | 4.2901  |

Filename: 3-190 rac file# 2

6/17/2014 12:38:56 PM  
 Analyst: Administrator  
 Method: 01-Default2  
 Conditions: OJ-H (25 x 0.46cm), 20% ethanol(DEA)/CO2, 100 bar, 3 mL/min.

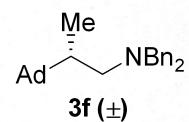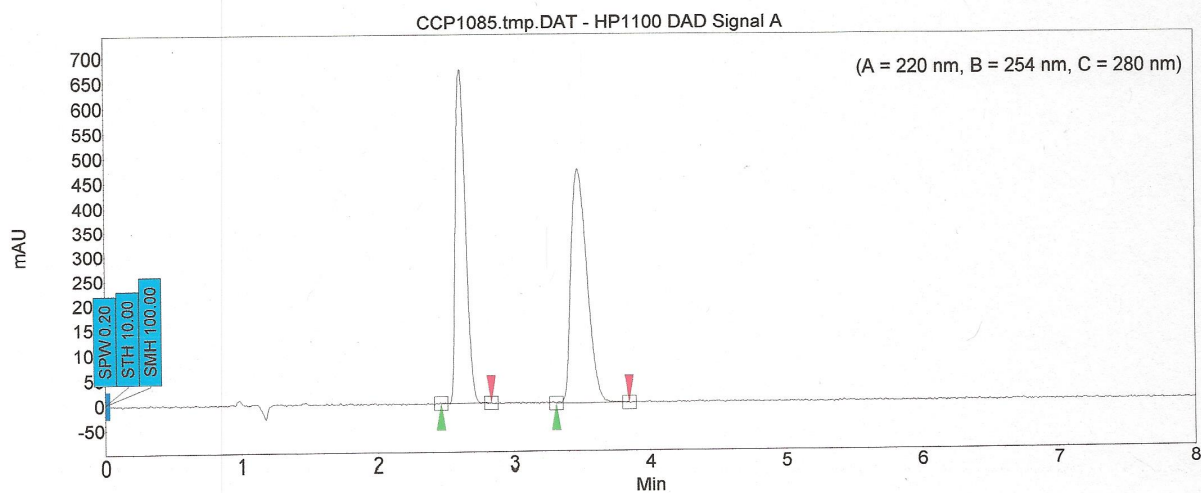

| Index | Time  | Width | Height | Res. HW | Selectivity | Area     | Area    |
|-------|-------|-------|--------|---------|-------------|----------|---------|
|       | [Min] | [Min] | [μV]   |         |             | [μV.Min] | [%]     |
| 1     | 2.62  | 0.08  | 674.3  | 0.00    | 0.00        | 57.0     | 47.084  |
| 2     | 3.48  | 0.13  | 475.4  | 4.83    | 1.33        | 64.1     | 52.916  |
| Total |       |       | 1149.6 |         |             | 121.2    | 100.000 |

Filename: 3-216 opt file# 3

6/17/2014 12:59:05 PM  
 Analyst: Administrator  
 Method: 01-Default2  
 Conditions: OJ-H (25 x 0.46cm), 20% ethanol(DEA)/CO2, 100 bar, 3 mL/min.

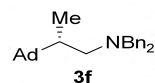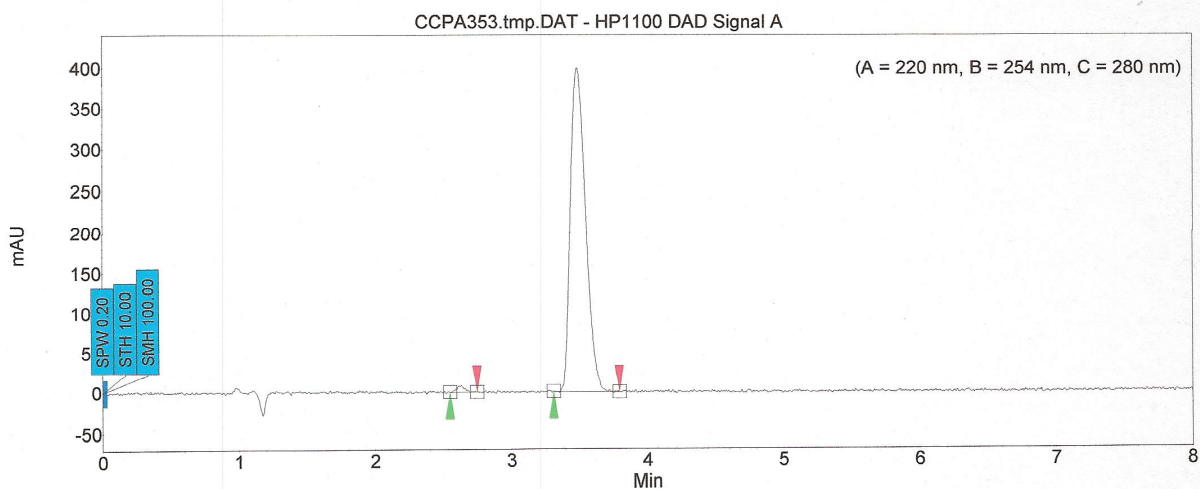

| Index | Time  | Width | Height     | Res. HW | Selectivity | Area           | Area    |
|-------|-------|-------|------------|---------|-------------|----------------|---------|
|       | [Min] | [Min] | [ $\mu$ V] |         |             | [ $\mu$ V.Min] | [%]     |
| 1     | 2.63  | 0.06  | 8.1        | 0.00    | 0.00        | 0.6            | 1.072   |
| 2     | 3.49  | 0.12  | 399.5      | 5.54    | 1.32        | 51.7           | 98.928  |
| Total |       |       | 407.6      |         |             | 52.2           | 100.000 |

Data File C:\CHEM32\1\DATA\ZHU\NAOYUKI\_LC 2014-03-28 17-00-56\SZ3-236-2OJ5ETOH.D

Sample Name: 3-236-2RAC

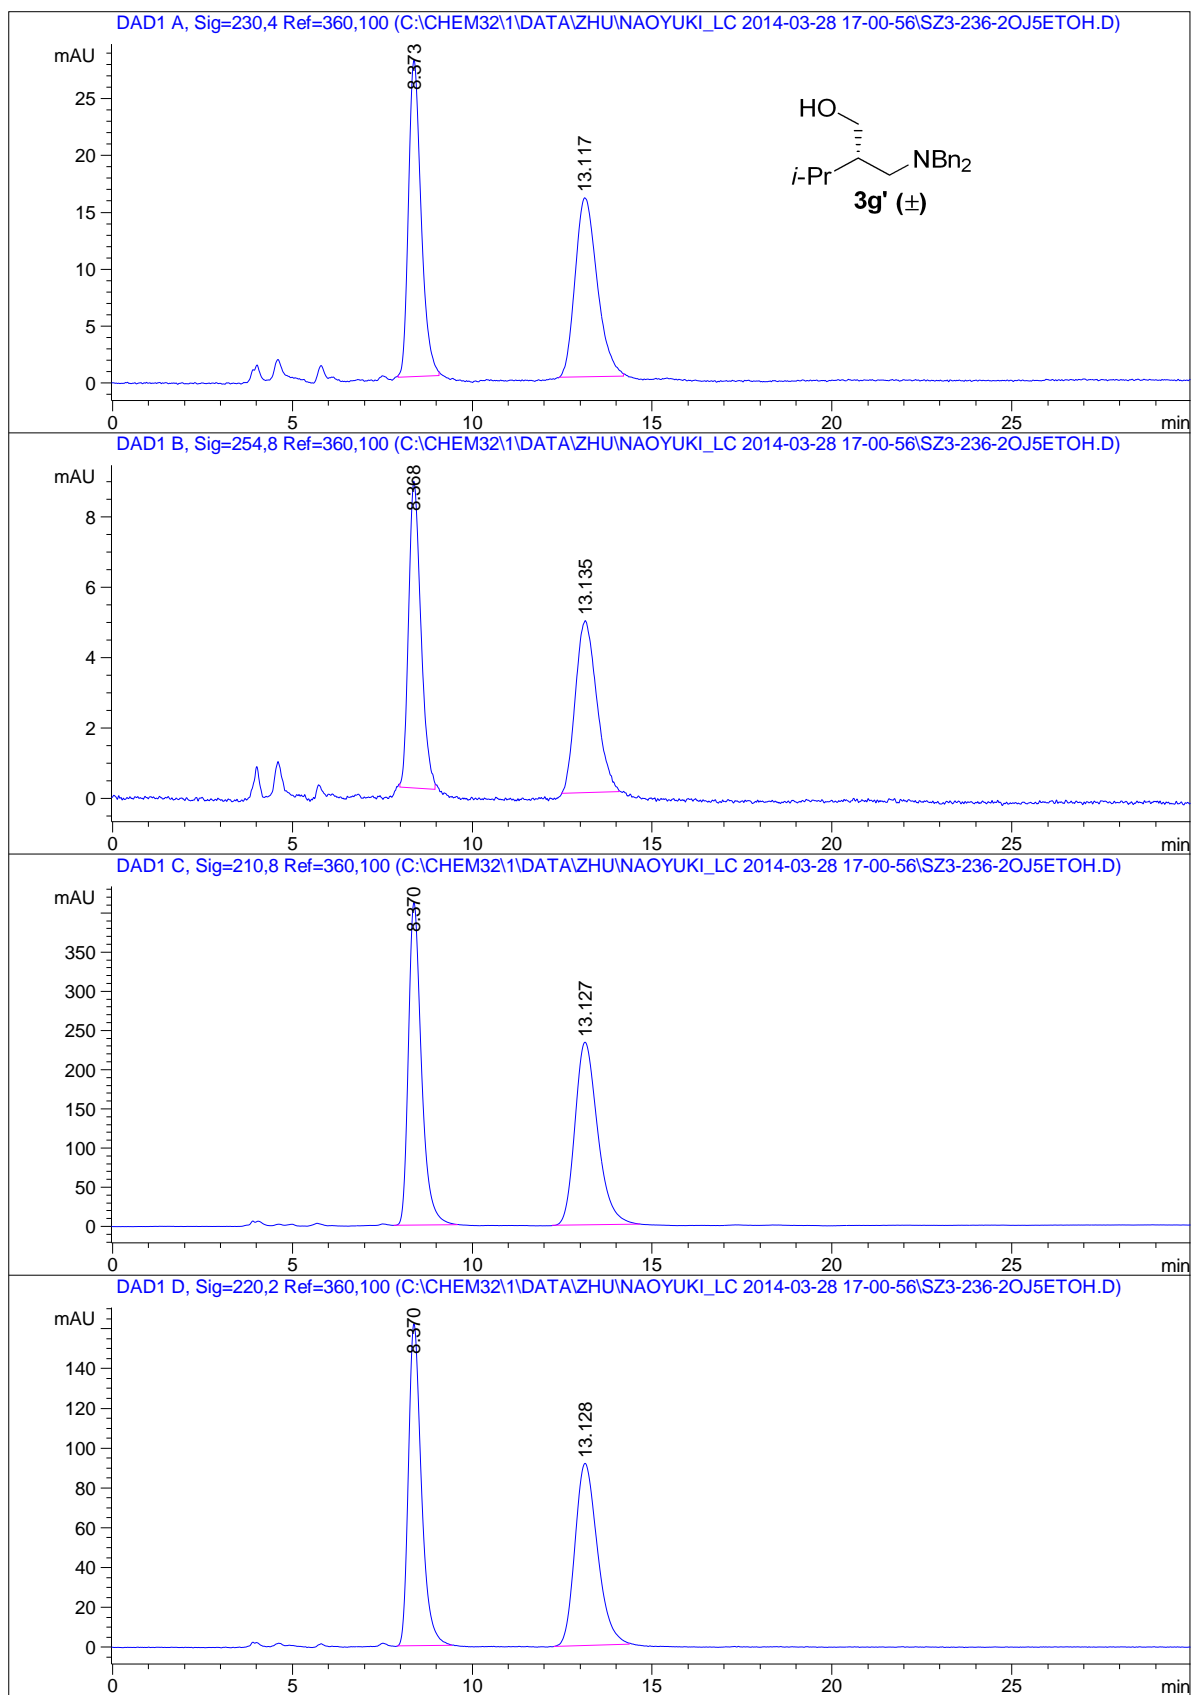

Data File C:\CHEM32\1\DATA\ZHU\NAOYUKI\_LC 2014-03-28 17-00-56\SZ3-236-2OJ5ETOH.D  
 Sample Name: 3-236-2RAC

=====  
 Area Percent Report  
 =====

Sorted By : Signal  
 Multiplier: : 1.0000  
 Dilution: : 1.0000  
 Use Multiplier & Dilution Factor with ISTDs

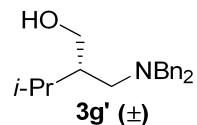

Signal 1: DAD1 A, Sig=230,4 Ref=360,100

| Peak # | RetTime [min] | Type | Width [min] | Area [mAU*s] | Height [mAU] | Area %  |
|--------|---------------|------|-------------|--------------|--------------|---------|
| 1      | 8.373         | BB   | 0.3710      | 680.23718    | 27.84896     | 50.1878 |
| 2      | 13.117        | BB   | 0.5254      | 675.14734    | 15.77333     | 49.8122 |

Totals : 1355.38452 43.62230

Signal 2: DAD1 B, Sig=254,8 Ref=360,100

| Peak # | RetTime [min] | Type | Width [min] | Area [mAU*s] | Height [mAU] | Area %  |
|--------|---------------|------|-------------|--------------|--------------|---------|
| 1      | 8.368         | BB   | 0.3490      | 206.90419    | 8.71283      | 50.5707 |
| 2      | 13.135        | BB   | 0.4939      | 202.23465    | 4.89609      | 49.4293 |

Totals : 409.13884 13.60892

Signal 3: DAD1 C, Sig=210,8 Ref=360,100

| Peak # | RetTime [min] | Type | Width [min] | Area [mAU*s] | Height [mAU] | Area %  |
|--------|---------------|------|-------------|--------------|--------------|---------|
| 1      | 8.370         | VB   | 0.3840      | 1.03759e4    | 411.70651    | 50.2611 |
| 2      | 13.127        | BB   | 0.6672      | 1.02681e4    | 233.44797    | 49.7389 |

Totals : 2.06441e4 645.15448

Signal 4: DAD1 D, Sig=220,2 Ref=360,100

| Peak # | RetTime [min] | Type | Width [min] | Area [mAU*s] | Height [mAU] | Area %  |
|--------|---------------|------|-------------|--------------|--------------|---------|
| 1      | 8.370         | BB   | 0.3784      | 4059.01685   | 161.94374    | 50.4442 |
| 2      | 13.128        | BB   | 0.6199      | 3987.53027   | 91.59927     | 49.5558 |



Data File C:\CHEM32\1\DATA\ZHU\NAOYUKI\_LC 2014-03-28 17-00-56\SZ3-244-2OJ5ETOH.D

Sample Name: 3-244-2

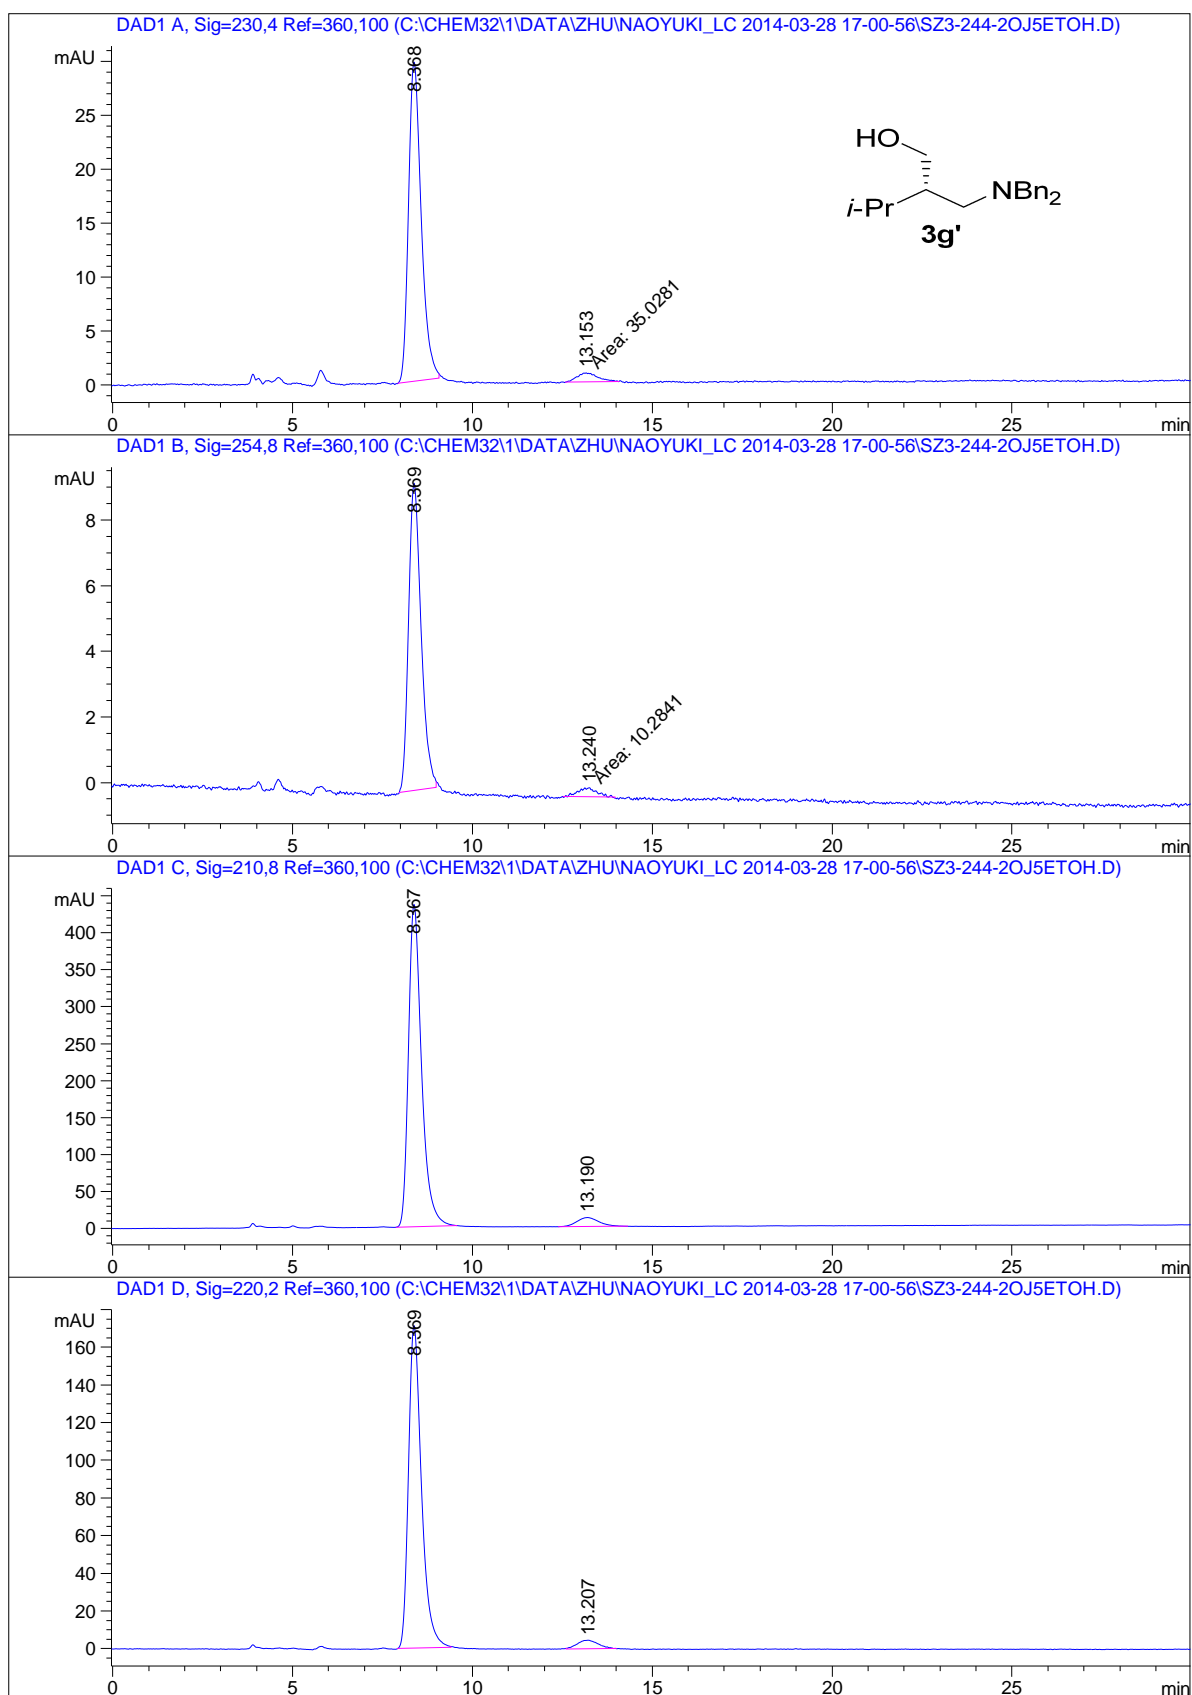

Data File C:\CHEM32\1\DATA\ZHU\NAOYUKI\_LC 2014-03-28 17-00-56\SZ3-244-2OJ5ETOH.D  
 Sample Name: 3-244-2

=====  
 Area Percent Report  
 =====

Sorted By : Signal  
 Multiplier: : 1.0000  
 Dilution: : 1.0000  
 Use Multiplier & Dilution Factor with ISTDs

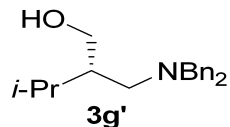

Signal 1: DAD1 A, Sig=230,4 Ref=360,100

| Peak # | RetTime [min] | Type | Width [min] | Area [mAU*s] | Height [mAU] | Area %  |
|--------|---------------|------|-------------|--------------|--------------|---------|
| 1      | 8.368         | BB   | 0.3761      | 725.45667    | 29.58007     | 95.3940 |
| 2      | 13.153        | MM   | 0.6874      | 35.02814     | 8.49343e-1   | 4.6060  |

Totals : 760.48480 30.42941

Signal 2: DAD1 B, Sig=254,8 Ref=360,100

| Peak # | RetTime [min] | Type | Width [min] | Area [mAU*s] | Height [mAU] | Area %  |
|--------|---------------|------|-------------|--------------|--------------|---------|
| 1      | 8.369         | BB   | 0.3504      | 226.85265    | 9.37260      | 95.6632 |
| 2      | 13.240        | MM   | 0.6111      | 10.28411     | 2.80478e-1   | 4.3368  |

Totals : 237.13676 9.65308

Signal 3: DAD1 C, Sig=210,8 Ref=360,100

| Peak # | RetTime [min] | Type | Width [min] | Area [mAU*s] | Height [mAU] | Area %  |
|--------|---------------|------|-------------|--------------|--------------|---------|
| 1      | 8.367         | BB   | 0.3848      | 1.10249e4    | 436.25629    | 95.4133 |
| 2      | 13.190        | BB   | 0.5166      | 529.98138    | 12.25428     | 4.5867  |

Totals : 1.15549e4 448.51056

Signal 4: DAD1 D, Sig=220,2 Ref=360,100

| Peak # | RetTime [min] | Type | Width [min] | Area [mAU*s] | Height [mAU] | Area %  |
|--------|---------------|------|-------------|--------------|--------------|---------|
| 1      | 8.369         | BB   | 0.3813      | 4307.54736   | 171.31474    | 95.6548 |
| 2      | 13.207        | BV   | 0.5007      | 195.67372    | 4.67162      | 4.3452  |

Data File C:\CHEM32\1\DATA\ZHU\NAOYUKI\_LC 2014-03-15 20-24-45\SZ3-199-2IA5ETOH.D

Sample Name: 3-199-2RAC

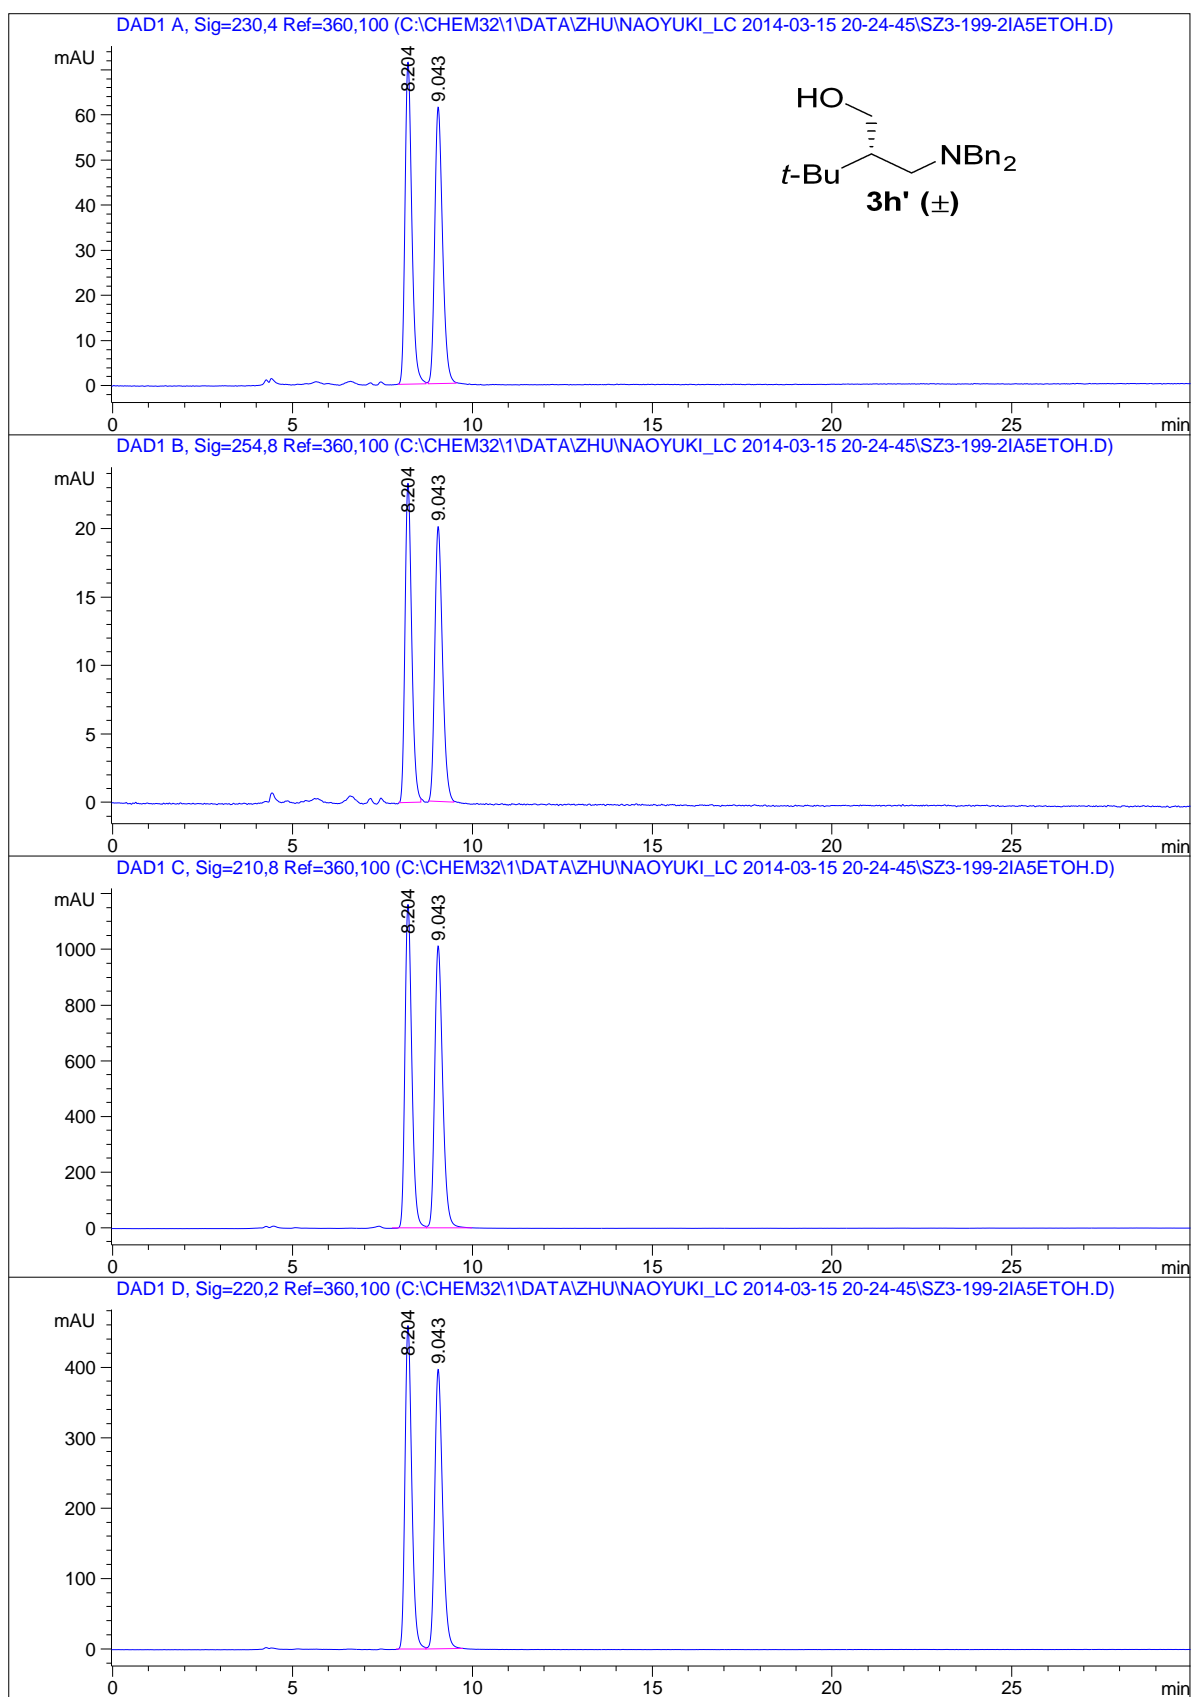

Data File C:\CHEM32\1\DATA\ZHU\NAOYUKI\_LC 2014-03-15 20-24-45\SZ3-199-2IA5ETOH.D  
 Sample Name: 3-199-2RAC

=====  
 Area Percent Report  
 =====

Sorted By : Signal  
 Multiplier: : 1.0000  
 Dilution: : 1.0000  
 Use Multiplier & Dilution Factor with ISTDs

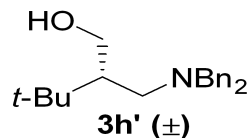

Signal 1: DAD1 A, Sig=230,4 Ref=360,100

| Peak # | RetTime [min] | Type | Width [min] | Area [mAU*s] | Height [mAU] | Area %  |
|--------|---------------|------|-------------|--------------|--------------|---------|
| 1      | 8.204         | BB   | 0.2015      | 939.65851    | 71.41203     | 50.3905 |
| 2      | 9.043         | BB   | 0.2319      | 925.09442    | 61.34826     | 49.6095 |

Totals : 1864.75293 132.76029

Signal 2: DAD1 B, Sig=254,8 Ref=360,100

| Peak # | RetTime [min] | Type | Width [min] | Area [mAU*s] | Height [mAU] | Area %  |
|--------|---------------|------|-------------|--------------|--------------|---------|
| 1      | 8.204         | BB   | 0.1981      | 300.35788    | 23.34254     | 50.1144 |
| 2      | 9.043         | BB   | 0.2276      | 298.98682    | 20.09710     | 49.8856 |

Totals : 599.34470 43.43964

Signal 3: DAD1 C, Sig=210,8 Ref=360,100

| Peak # | RetTime [min] | Type | Width [min] | Area [mAU*s] | Height [mAU] | Area %  |
|--------|---------------|------|-------------|--------------|--------------|---------|
| 1      | 8.204         | VV   | 0.2061      | 1.53704e4    | 1163.38965   | 49.5978 |
| 2      | 9.043         | VB   | 0.2358      | 1.56197e4    | 1013.75104   | 50.4022 |

Totals : 3.09901e4 2177.14069

Signal 4: DAD1 D, Sig=220,2 Ref=360,100

| Peak # | RetTime [min] | Type | Width [min] | Area [mAU*s] | Height [mAU] | Area %  |
|--------|---------------|------|-------------|--------------|--------------|---------|
| 1      | 8.204         | BV   | 0.2007      | 6017.65625   | 459.75278    | 49.8030 |
| 2      | 9.043         | VB   | 0.2342      | 6065.25342   | 397.14398    | 50.1970 |

Data File C:\CHEM32\1\DATA\ZHU\NAOYUKI\_LC 2014-03-15 20-24-45\SZ3-217-2IA5ETOH.D

Sample Name: 3-217-2

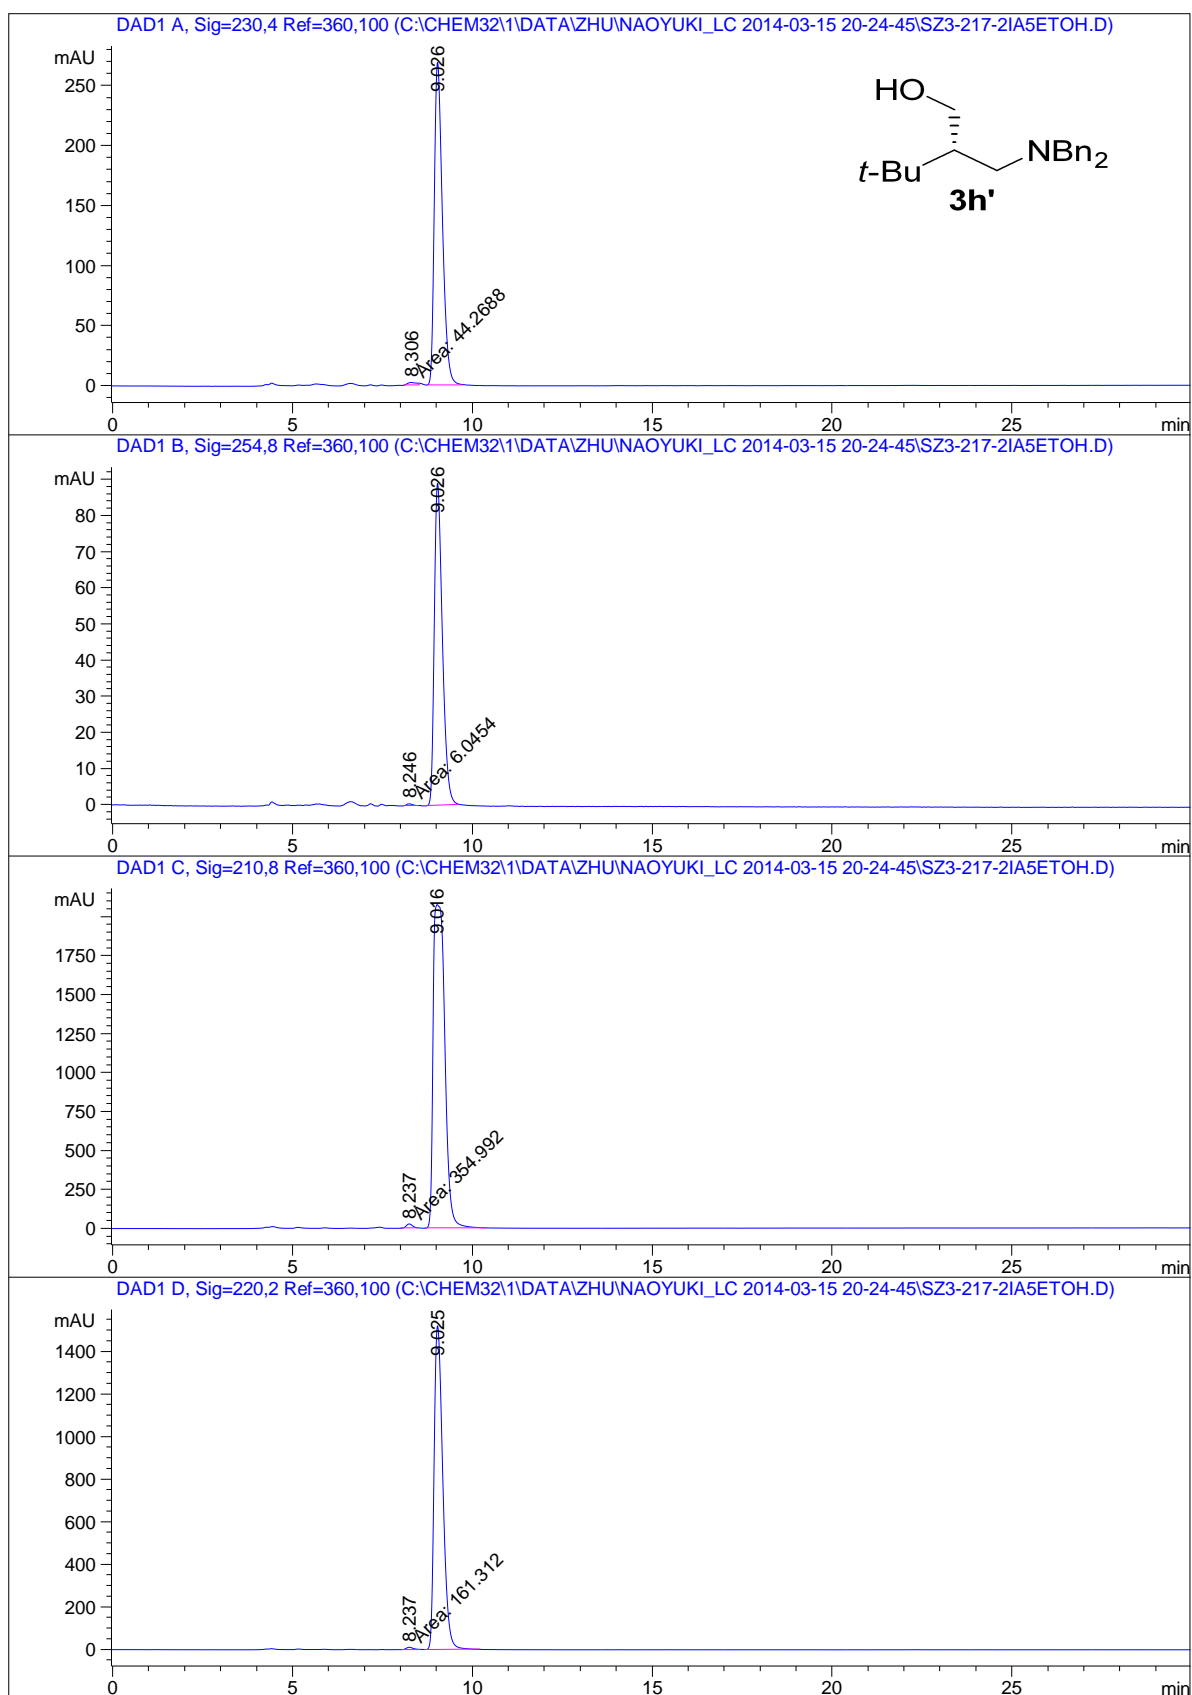

Data File C:\CHEM32\1\DATA\ZHU\NAOYUKI\_LC 2014-03-15 20-24-45\SZ3-217-2IA5ETOH.D  
 Sample Name: 3-217-2

=====  
 Area Percent Report  
 =====

Sorted By : Signal  
 Multiplier: : 1.0000  
 Dilution: : 1.0000  
 Use Multiplier & Dilution Factor with ISTDs

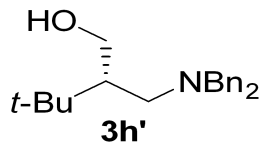

Signal 1: DAD1 A, Sig=230,4 Ref=360,100

| Peak # | RetTime [min] | Type | Width [min] | Area [mAU*s] | Height [mAU] | Area %  |
|--------|---------------|------|-------------|--------------|--------------|---------|
| 1      | 8.306         | MF   | 0.3200      | 44.26880     | 2.30570      | 1.0379  |
| 2      | 9.026         | VB   | 0.2411      | 4220.97852   | 269.00668    | 98.9621 |

Totals : 4265.24732 271.31238

Signal 2: DAD1 B, Sig=254,8 Ref=360,100

| Peak # | RetTime [min] | Type | Width [min] | Area [mAU*s] | Height [mAU] | Area %  |
|--------|---------------|------|-------------|--------------|--------------|---------|
| 1      | 8.246         | MF   | 0.1909      | 6.04540      | 5.27715e-1   | 0.4326  |
| 2      | 9.026         | BB   | 0.2382      | 1391.52185   | 89.10548     | 99.5674 |

Totals : 1397.56725 89.63320

Signal 3: DAD1 C, Sig=210,8 Ref=360,100

| Peak # | RetTime [min] | Type | Width [min] | Area [mAU*s] | Height [mAU] | Area %  |
|--------|---------------|------|-------------|--------------|--------------|---------|
| 1      | 8.237         | MF   | 0.2133      | 354.99210    | 27.73767     | 0.7525  |
| 2      | 9.016         | BB   | 0.3072      | 4.68229e4    | 2075.79932   | 99.2475 |

Totals : 4.71779e4 2103.53699

Signal 4: DAD1 D, Sig=220,2 Ref=360,100

| Peak # | RetTime [min] | Type | Width [min] | Area [mAU*s] | Height [mAU] | Area %  |
|--------|---------------|------|-------------|--------------|--------------|---------|
| 1      | 8.237         | MF   | 0.2383      | 161.31218    | 11.28305     | 0.6259  |
| 2      | 9.025         | VB   | 0.2603      | 2.56111e4    | 1521.89282   | 99.3741 |

Data File C:\CHEM32\1\DATA\ZHU\NAOYUKI\_LC 2014-04-29 13-07-57\SZ3-224-2IA1ETOH\_.D

Sample Name: 3-224-2RAC

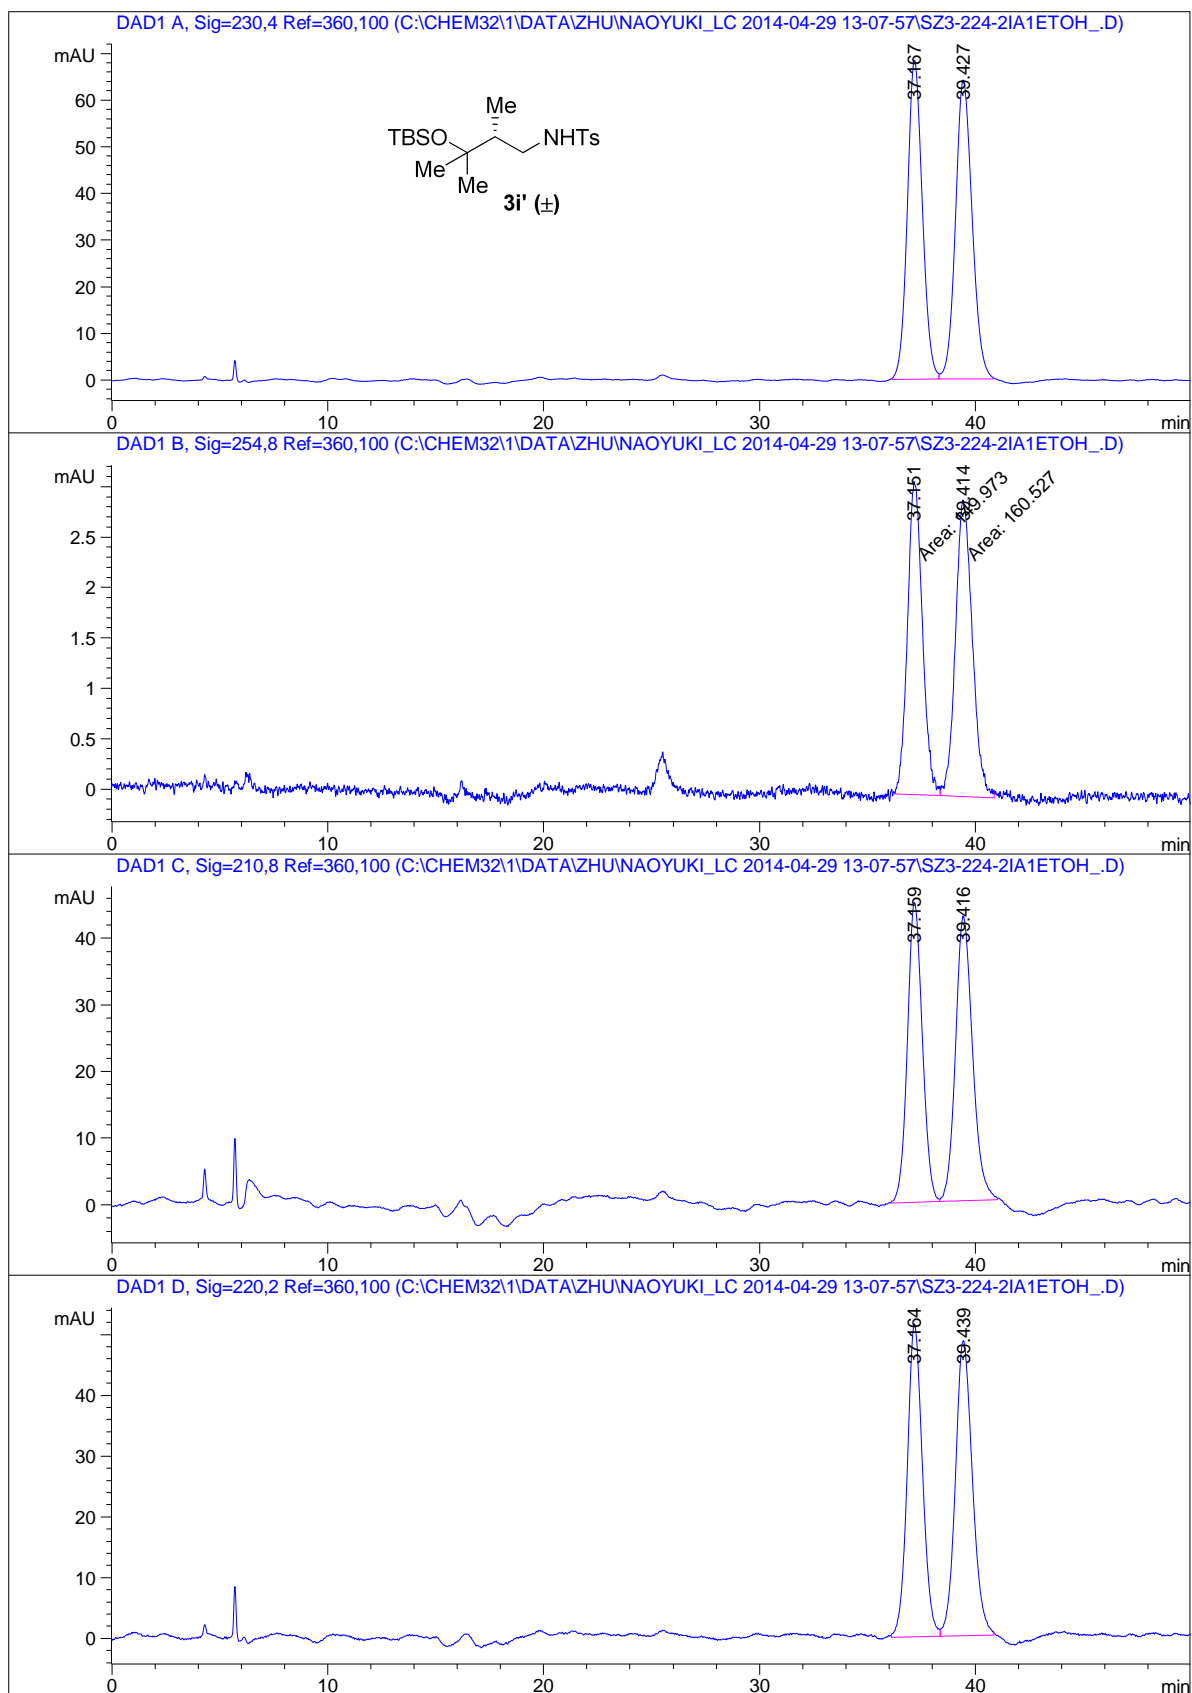

Data File C:\CHEM32\1\DATA\ZHU\NAOYUKI\_LC 2014-04-29 13-07-57\SZ3-224-2IA1ETOH\_.D  
 Sample Name: 3-224-2RAC

=====  
 Area Percent Report  
 =====

Sorted By : Signal  
 Multiplier: : 1.0000  
 Dilution: : 1.0000  
 Use Multiplier & Dilution Factor with ISTDs

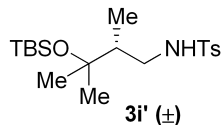

Signal 1: DAD1 A, Sig=230,4 Ref=360,100

| Peak # | RetTime [min] | Type | Width [min] | Area [mAU*s] | Height [mAU] | Area %  |
|--------|---------------|------|-------------|--------------|--------------|---------|
| 1      | 37.167        | BV   | 0.7146      | 3311.77173   | 68.43837     | 49.0088 |
| 2      | 39.427        | VB   | 0.7871      | 3445.72852   | 64.10558     | 50.9912 |

Totals : 6757.50024 132.54395

Signal 2: DAD1 B, Sig=254,8 Ref=360,100

| Peak # | RetTime [min] | Type | Width [min] | Area [mAU*s] | Height [mAU] | Area %  |
|--------|---------------|------|-------------|--------------|--------------|---------|
| 1      | 37.151        | MF   | 0.8029      | 149.97324    | 3.11318      | 48.3006 |
| 2      | 39.414        | FM   | 0.9071      | 160.52666    | 2.94952      | 51.6994 |

Totals : 310.49989 6.06270

Signal 3: DAD1 C, Sig=210,8 Ref=360,100

| Peak # | RetTime [min] | Type | Width [min] | Area [mAU*s] | Height [mAU] | Area %  |
|--------|---------------|------|-------------|--------------|--------------|---------|
| 1      | 37.159        | BV   | 0.6461      | 2178.37427   | 45.05362     | 48.0833 |
| 2      | 39.416        | VB   | 0.6517      | 2352.04053   | 42.76493     | 51.9167 |

Totals : 4530.41479 87.81855

Signal 4: DAD1 D, Sig=220,2 Ref=360,100

| Peak # | RetTime [min] | Type | Width [min] | Area [mAU*s] | Height [mAU] | Area %  |
|--------|---------------|------|-------------|--------------|--------------|---------|
| 1      | 37.164        | BV   | 0.6573      | 2534.46411   | 51.57653     | 48.7080 |
| 2      | 39.439        | VB   | 0.6845      | 2668.91870   | 48.61504     | 51.2920 |



Data File C:\CHEM32\1\DATA\ZHU\NAOYUKI\_LC 2014-04-29 13-07-57\SZ3-248-2IA1ETOH\_.D  
 Sample Name: 3-248-2

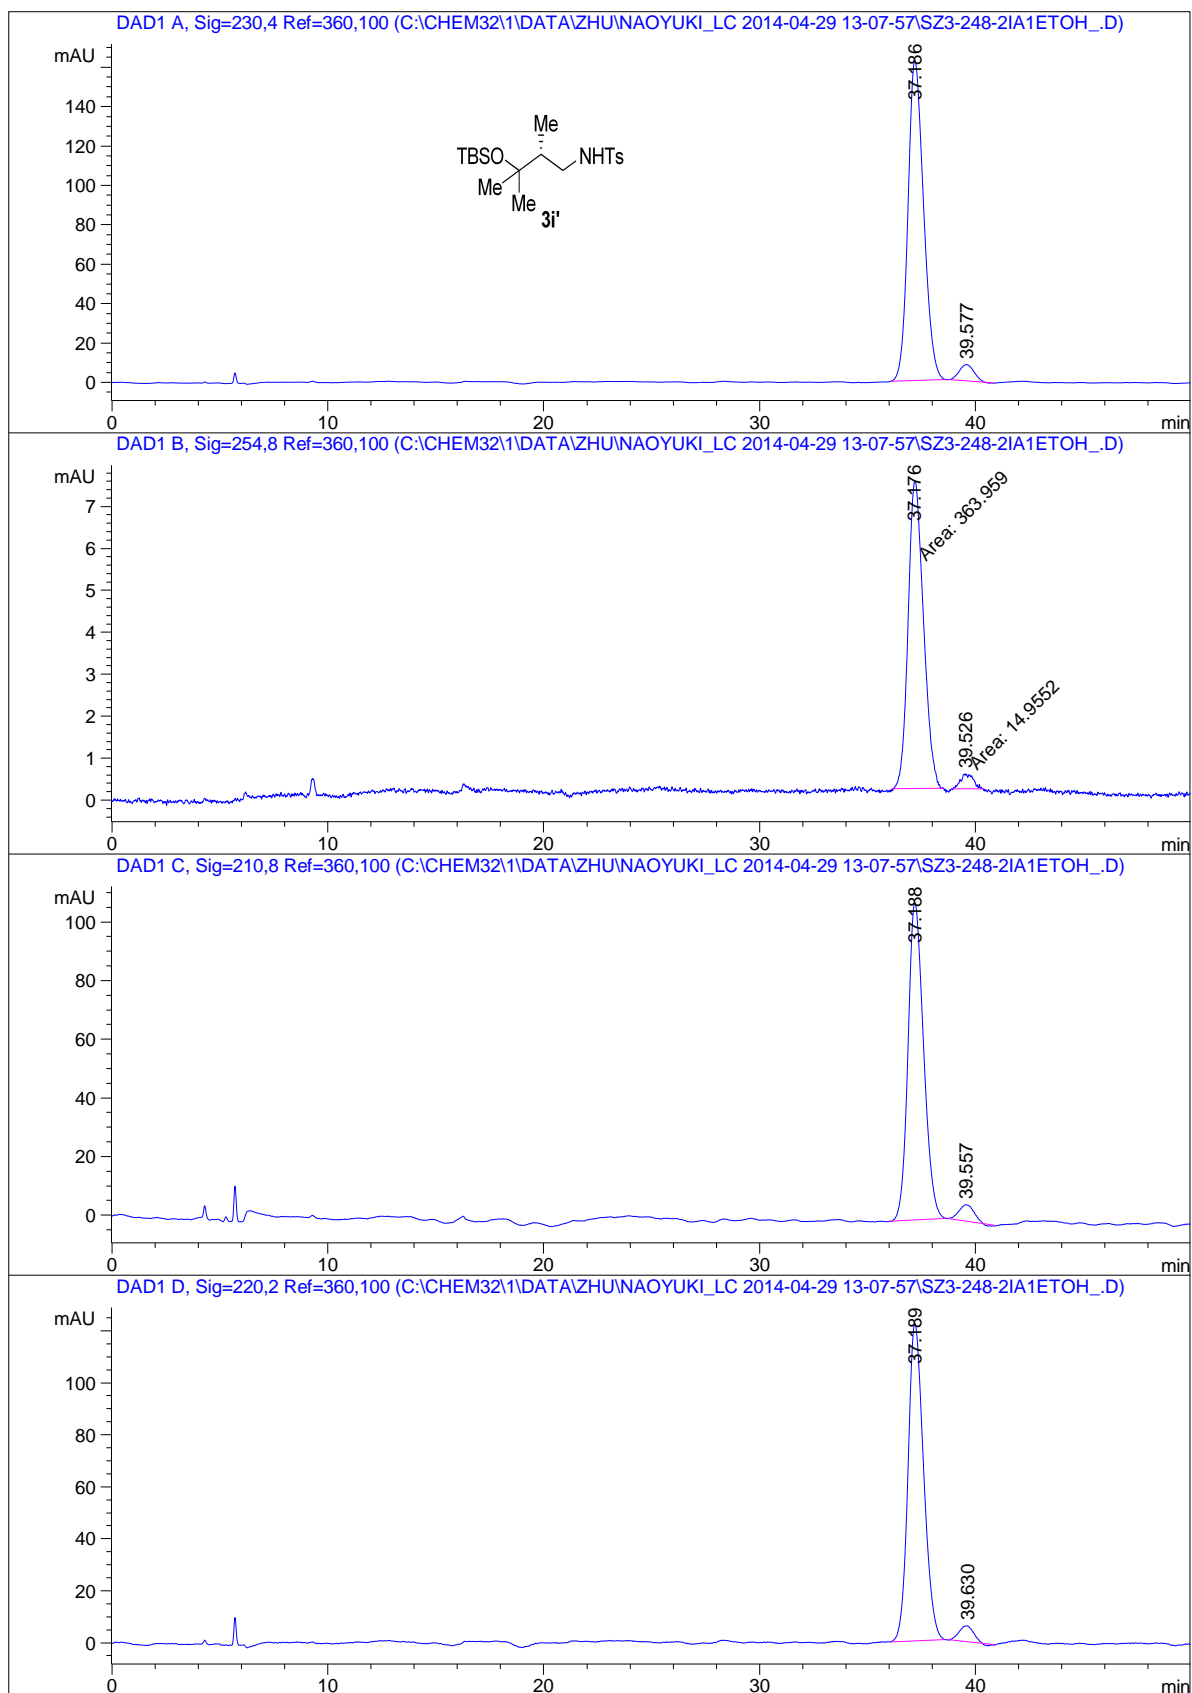

Data File C:\CHEM32\1\DATA\ZHU\NAOYUKI\_LC 2014-04-29 13-07-57\SZ3-248-2IA1ETOH\_.D  
 Sample Name: 3-248-2

=====  
 Area Percent Report  
 =====

Sorted By : Signal  
 Multiplier: : 1.0000  
 Dilution: : 1.0000  
 Use Multiplier & Dilution Factor with ISTDs

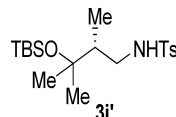

Signal 1: DAD1 A, Sig=230,4 Ref=360,100

| Peak # | RetTime [min] | Type | Width [min] | Area [mAU*s] | Height [mAU] | Area %  |
|--------|---------------|------|-------------|--------------|--------------|---------|
| 1      | 37.186        | BB   | 0.7661      | 8172.57520   | 162.68796    | 95.3867 |
| 2      | 39.577        | BB   | 0.5693      | 395.25748    | 8.36450      | 4.6133  |

Totals : 8567.83267 171.05246

Signal 2: DAD1 B, Sig=254,8 Ref=360,100

| Peak # | RetTime [min] | Type | Width [min] | Area [mAU*s] | Height [mAU] | Area %  |
|--------|---------------|------|-------------|--------------|--------------|---------|
| 1      | 37.176        | MM   | 0.8274      | 363.95905    | 7.33125      | 96.0531 |
| 2      | 39.526        | MM   | 0.6938      | 14.95520     | 3.59273e-1   | 3.9469  |

Totals : 378.91424 7.69053

Signal 3: DAD1 C, Sig=210,8 Ref=360,100

| Peak # | RetTime [min] | Type | Width [min] | Area [mAU*s] | Height [mAU] | Area %  |
|--------|---------------|------|-------------|--------------|--------------|---------|
| 1      | 37.188        | BB   | 0.7105      | 5445.63281   | 108.31601    | 95.2927 |
| 2      | 39.557        | BB   | 0.5658      | 269.00684    | 5.66710      | 4.7073  |

Totals : 5714.63965 113.98311

Signal 4: DAD1 D, Sig=220,2 Ref=360,100

| Peak # | RetTime [min] | Type | Width [min] | Area [mAU*s] | Height [mAU] | Area %  |
|--------|---------------|------|-------------|--------------|--------------|---------|
| 1      | 37.189        | BB   | 0.7105      | 6138.13037   | 122.09863    | 95.6581 |
| 2      | 39.630        | BB   | 0.5389      | 278.60617    | 6.16874      | 4.3419  |

Data File C:\CHEM32\1\DATA\ZHU\NAOYUKI\_LC 2014-05-26 14-29-07\4-63-2IA20E.D

Sample Name: 4-63-2RAC

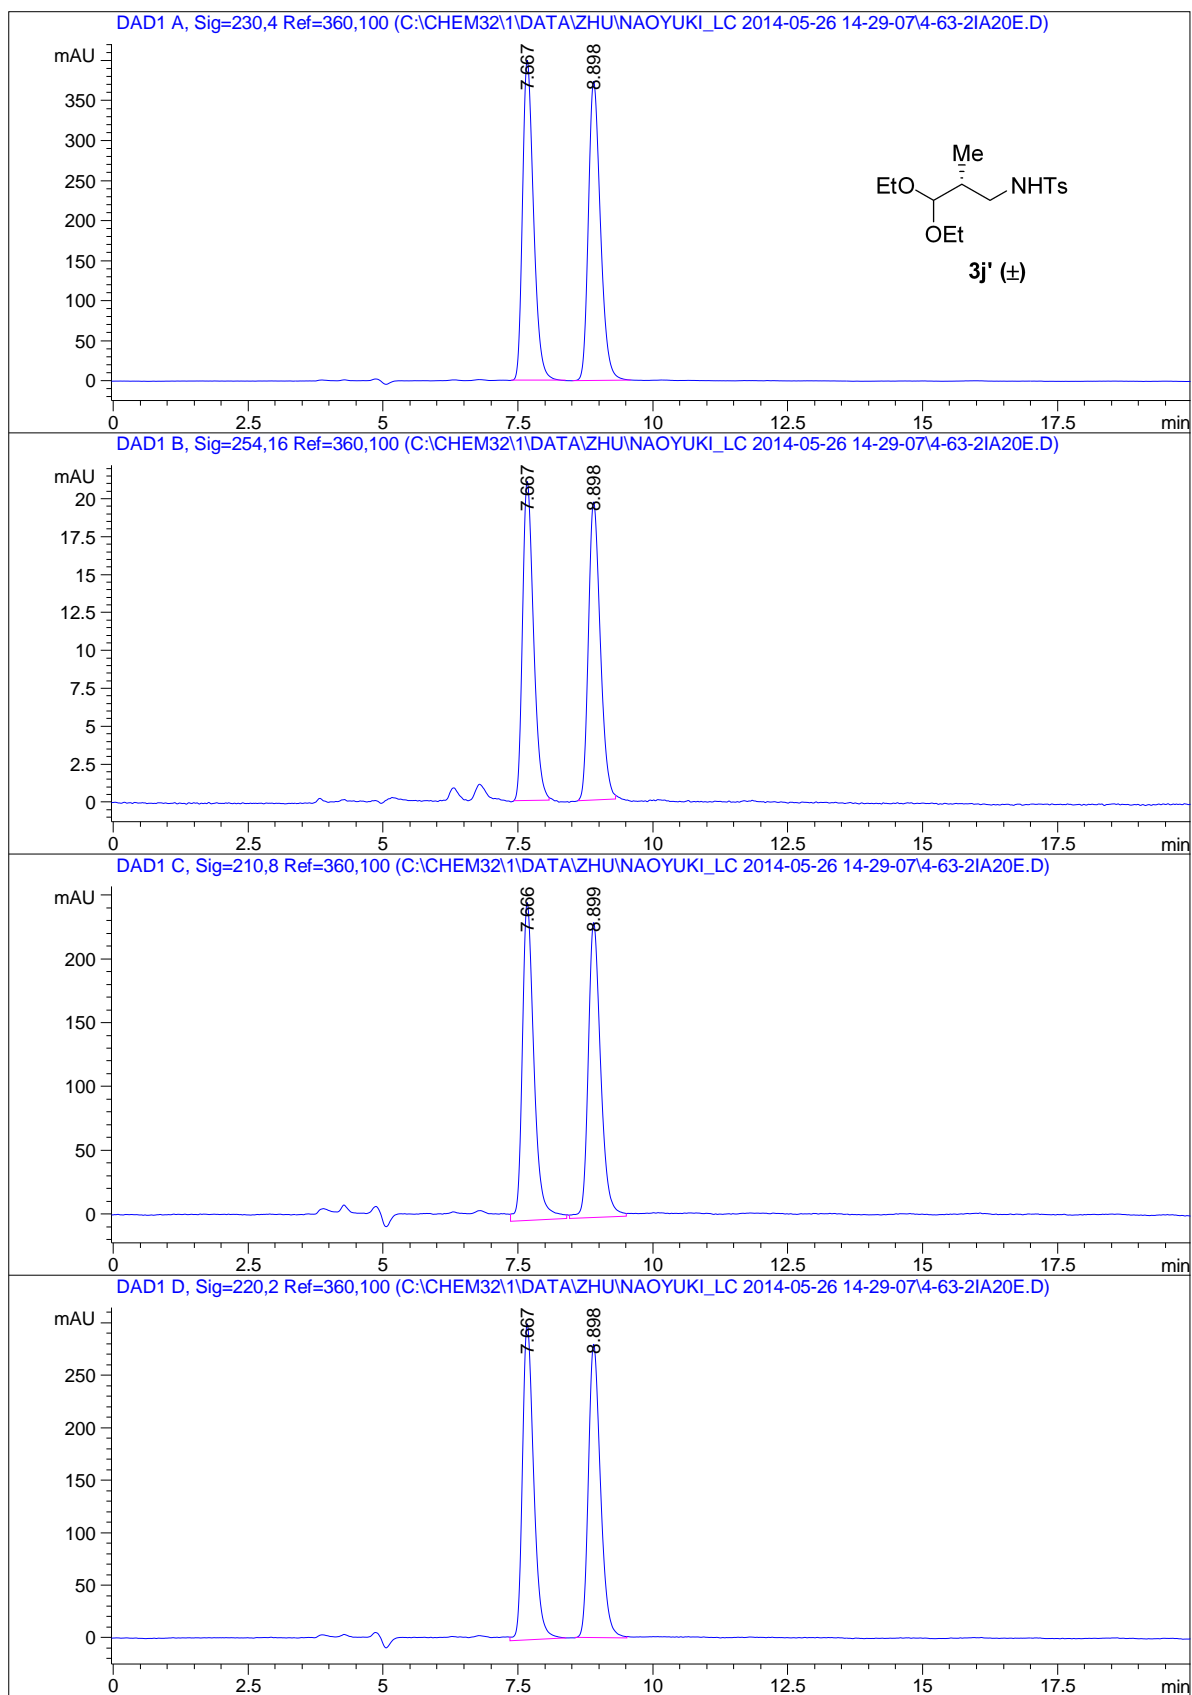

Data File C:\CHEM32\1\DATA\ZHU\NAOYUKI\_LC 2014-05-26 14-29-07\4-63-2IA20E.D  
 Sample Name: 4-63-2RAC

=====  
 Area Percent Report  
 =====

Sorted By : Signal  
 Multiplier: : 1.0000  
 Dilution: : 1.0000  
 Use Multiplier & Dilution Factor with ISTDs

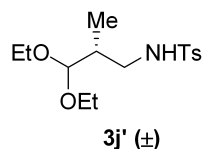

Signal 1: DAD1 A, Sig=230,4 Ref=360,100

| Peak # | RetTime [min] | Type | Width [min] | Area [mAU*s] | Height [mAU] | Area %  |
|--------|---------------|------|-------------|--------------|--------------|---------|
| 1      | 7.667         | BB   | 0.2200      | 5690.02100   | 399.98007    | 49.5394 |
| 2      | 8.898         | BB   | 0.2390      | 5795.81836   | 373.62360    | 50.4606 |

Totals : 1.14858e4 773.60367

Signal 2: DAD1 B, Sig=254,16 Ref=360,100

| Peak # | RetTime [min] | Type | Width [min] | Area [mAU*s] | Height [mAU] | Area %  |
|--------|---------------|------|-------------|--------------|--------------|---------|
| 1      | 7.667         | BB   | 0.2210      | 297.95181    | 21.06805     | 49.8197 |
| 2      | 8.898         | BB   | 0.2341      | 300.10822    | 19.66439     | 50.1803 |

Totals : 598.06003 40.73244

Signal 3: DAD1 C, Sig=210,8 Ref=360,100

| Peak # | RetTime [min] | Type | Width [min] | Area [mAU*s] | Height [mAU] | Area %  |
|--------|---------------|------|-------------|--------------|--------------|---------|
| 1      | 7.666         | BB   | 0.2310      | 3783.84863   | 249.42395    | 50.3857 |
| 2      | 8.899         | BV   | 0.2497      | 3725.92407   | 231.53893    | 49.6143 |

Totals : 7509.77271 480.96288

Signal 4: DAD1 D, Sig=220,2 Ref=360,100

| Peak # | RetTime [min] | Type | Width [min] | Area [mAU*s] | Height [mAU] | Area %  |
|--------|---------------|------|-------------|--------------|--------------|---------|
| 1      | 7.667         | VB   | 0.2218      | 4388.61816   | 301.56210    | 50.1572 |
| 2      | 8.898         | BB   | 0.2378      | 4361.10400   | 279.79199    | 49.8428 |

Data File C:\CHEM32\1\DATA\ZHU\NAOYUKI\_LC 2014-05-26 14-29-07\4-70-2IA20E.D  
 Sample Name: 4-70-2

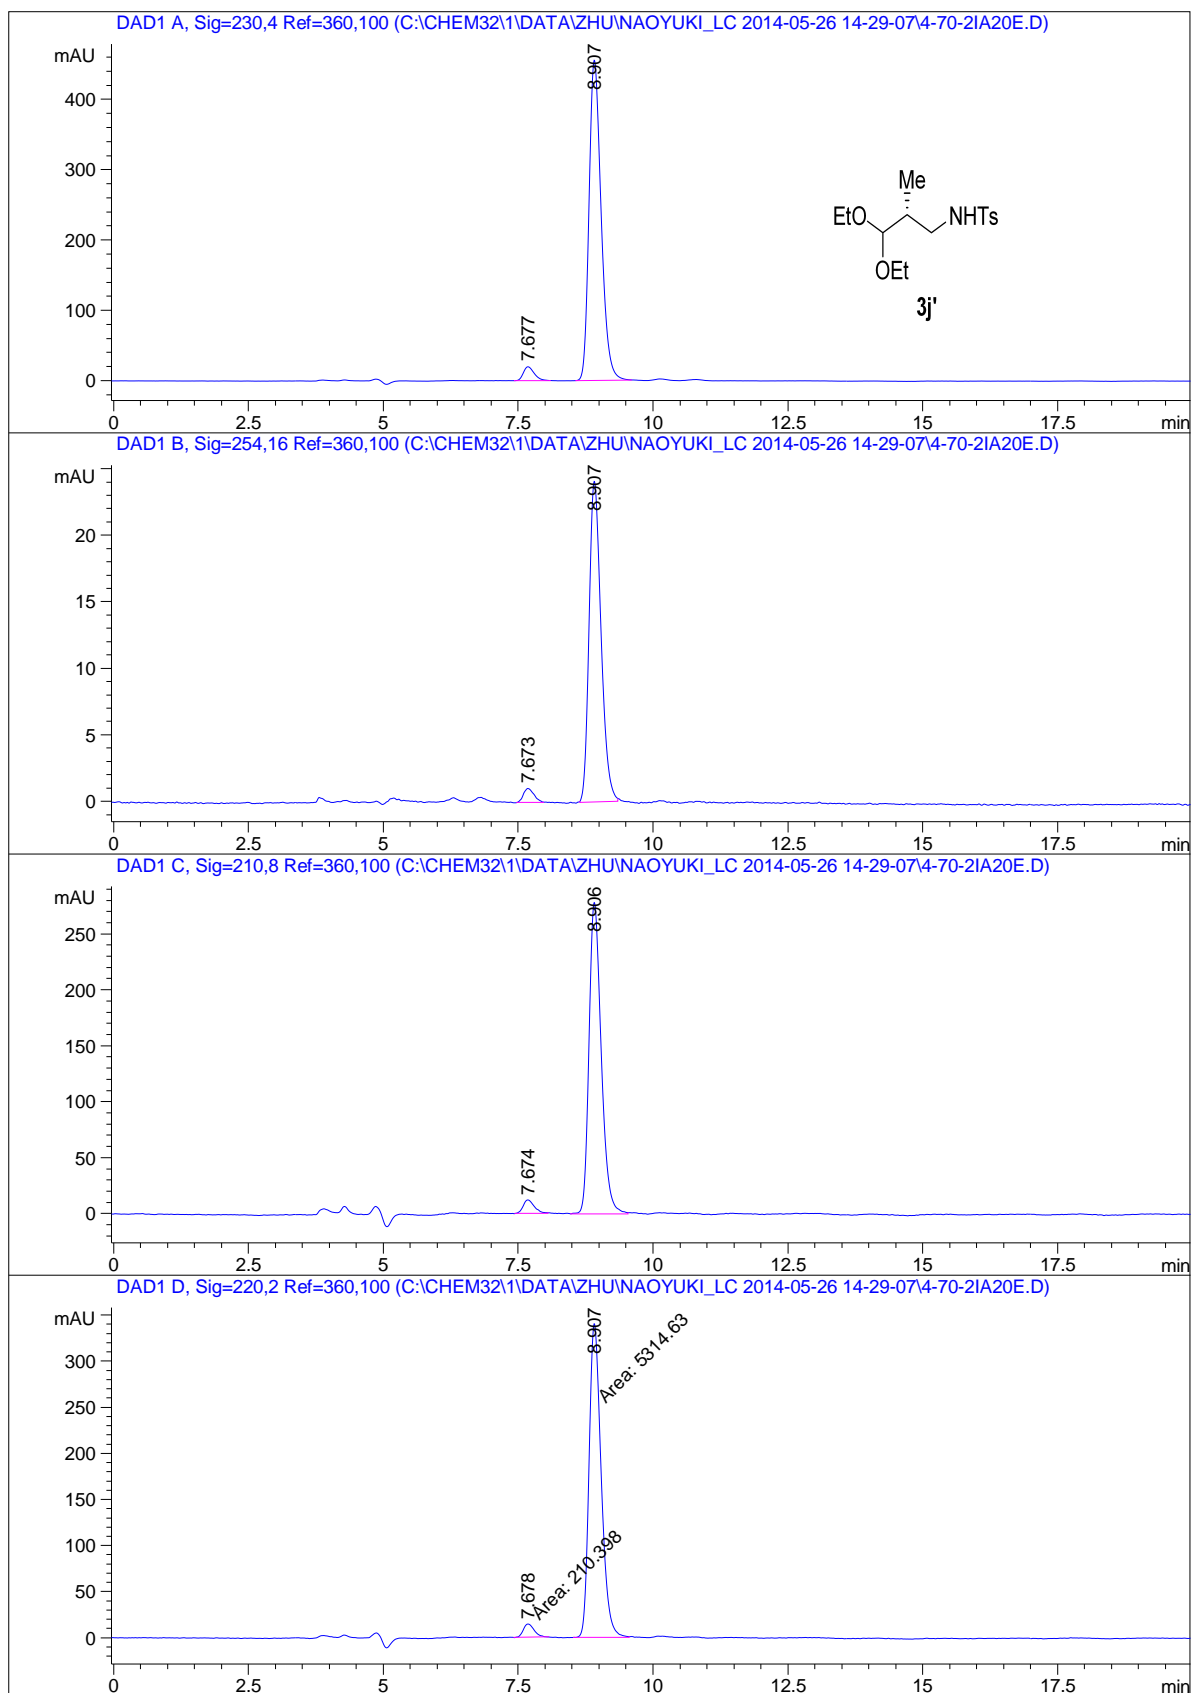

Data File C:\CHEM32\1\DATA\ZHU\NAOYUKI\_LC 2014-05-26 14-29-07\4-70-2IA20E.D  
 Sample Name: 4-70-2

=====  
 Area Percent Report  
 =====

Sorted By : Signal  
 Multiplier: : 1.0000  
 Dilution: : 1.0000  
 Use Multiplier & Dilution Factor with ISTDs

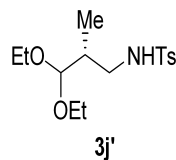

Signal 1: DAD1 A, Sig=230,4 Ref=360,100

| Peak # | RetTime [min] | Type | Width [min] | Area [mAU*s] | Height [mAU] | Area %  |
|--------|---------------|------|-------------|--------------|--------------|---------|
| 1      | 7.677         | BB   | 0.2170      | 279.71277    | 19.77936     | 3.7955  |
| 2      | 8.907         | BB   | 0.2415      | 7089.78662   | 455.67532    | 96.2045 |

Totals : 7369.49939 475.45468

Signal 2: DAD1 B, Sig=254,16 Ref=360,100

| Peak # | RetTime [min] | Type | Width [min] | Area [mAU*s] | Height [mAU] | Area %  |
|--------|---------------|------|-------------|--------------|--------------|---------|
| 1      | 7.673         | BB   | 0.1873      | 14.41707     | 1.05580      | 3.7438  |
| 2      | 8.907         | BB   | 0.2394      | 370.67987    | 24.10246     | 96.2562 |

Totals : 385.09694 25.15826

Signal 3: DAD1 C, Sig=210,8 Ref=360,100

| Peak # | RetTime [min] | Type | Width [min] | Area [mAU*s] | Height [mAU] | Area %  |
|--------|---------------|------|-------------|--------------|--------------|---------|
| 1      | 7.674         | BB   | 0.2150      | 184.35272    | 12.29248     | 4.0392  |
| 2      | 8.906         | VB   | 0.2435      | 4379.72705   | 278.44070    | 95.9608 |

Totals : 4564.07977 290.73318

Signal 4: DAD1 D, Sig=220,2 Ref=360,100

| Peak # | RetTime [min] | Type | Width [min] | Area [mAU*s] | Height [mAU] | Area %  |
|--------|---------------|------|-------------|--------------|--------------|---------|
| 1      | 7.678         | MM   | 0.2409      | 210.39832    | 14.55683     | 3.8081  |
| 2      | 8.907         | MM   | 0.2601      | 5314.62842   | 340.55402    | 96.1919 |

Data File C:\CHEM32\1\DATA\ZHU\NAOYUKI\_LC 2014-04-07 18-21-07\SZ3-198OD1.D

Sample Name: 3-198RAC

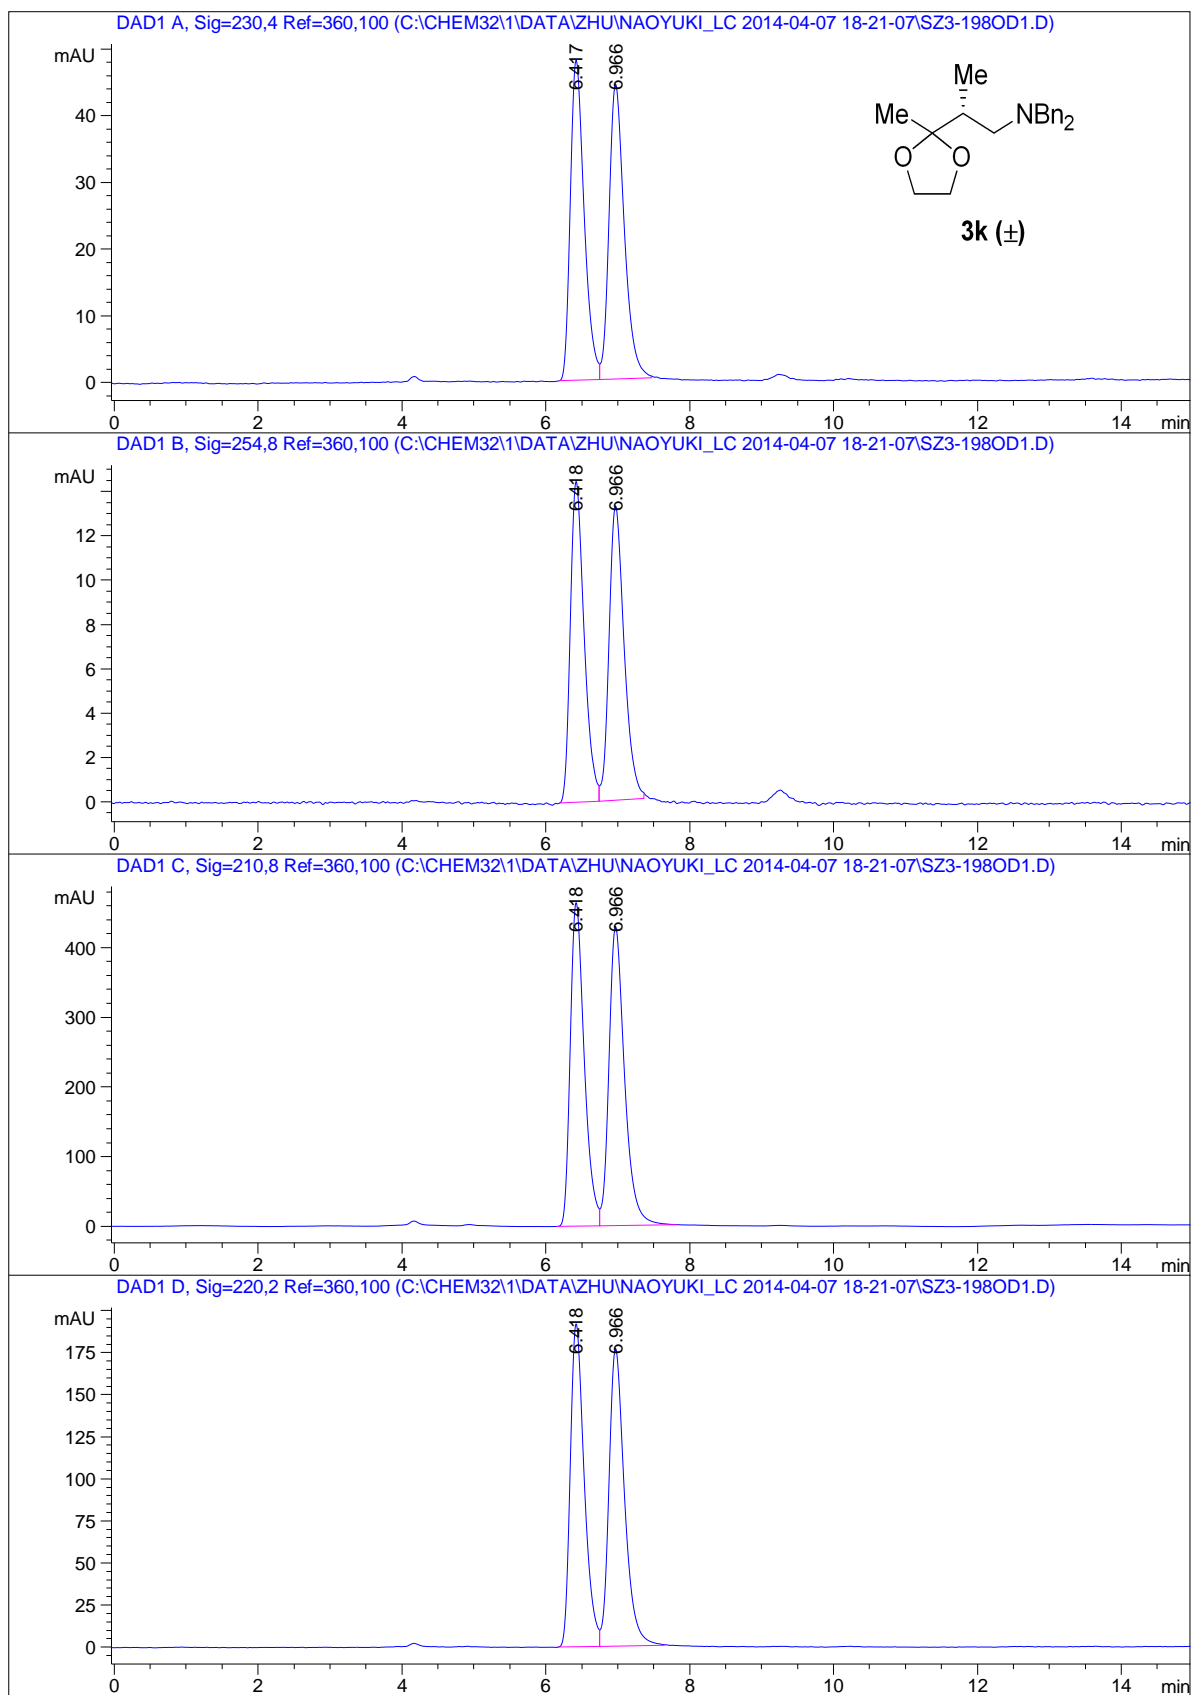

Data File C:\CHEM32\1\DATA\ZHU\NAOYUKI\_LC 2014-04-07 18-21-07\SZ3-198OD1.D  
 Sample Name: 3-198RAC

=====  
 Area Percent Report  
 =====

Sorted By : Signal  
 Multiplier: : 1.0000  
 Dilution: : 1.0000  
 Use Multiplier & Dilution Factor with ISTDs

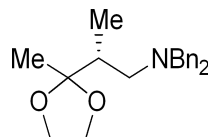

**3k (±)**

Signal 1: DAD1 A, Sig=230,4 Ref=360,100

| Peak # | RetTime [min] | Type | Width [min] | Area [mAU*s] | Height [mAU] | Area %  |
|--------|---------------|------|-------------|--------------|--------------|---------|
| 1      | 6.417         | BV   | 0.2063      | 643.38898    | 48.03854     | 49.5648 |
| 2      | 6.966         | VB   | 0.2265      | 654.68835    | 44.26672     | 50.4352 |

Totals : 1298.07733 92.30525

Signal 2: DAD1 B, Sig=254,8 Ref=360,100

| Peak # | RetTime [min] | Type | Width [min] | Area [mAU*s] | Height [mAU] | Area %  |
|--------|---------------|------|-------------|--------------|--------------|---------|
| 1      | 6.418         | BV   | 0.2037      | 193.45749    | 14.49752     | 49.8870 |
| 2      | 6.966         | VB   | 0.2245      | 194.33409    | 13.29823     | 50.1130 |

Totals : 387.79158 27.79576

Signal 3: DAD1 C, Sig=210,8 Ref=360,100

| Peak # | RetTime [min] | Type | Width [min] | Area [mAU*s] | Height [mAU] | Area %  |
|--------|---------------|------|-------------|--------------|--------------|---------|
| 1      | 6.418         | BV   | 0.2052      | 6258.90088   | 464.38293    | 49.1241 |
| 2      | 6.966         | VB   | 0.2301      | 6482.09814   | 429.33160    | 50.8759 |

Totals : 1.27410e4 893.71454

Signal 4: DAD1 D, Sig=220,2 Ref=360,100

| Peak # | RetTime [min] | Type | Width [min] | Area [mAU*s] | Height [mAU] | Area %  |
|--------|---------------|------|-------------|--------------|--------------|---------|
| 1      | 6.418         | BV   | 0.2072      | 2586.92065   | 192.04288    | 49.2740 |
| 2      | 6.966         | VB   | 0.2275      | 2663.15552   | 177.02283    | 50.7260 |



Data File C:\CHEM32\1\DATA\ZHU\NAOYUKI\_LC 2014-04-07 18-21-07\SZ3-252OD1.D  
 Sample Name: 3-252

```

=====
Acq. Operator   : YMW                               Seq. Line :    3
Acq. Instrument : Instrument 1                       Location  : Vial 71
Injection Date  : 4/7/2014 7:05:08 PM              Inj       :    1
                                                    Inj Volume: 5 µl
Different Inj Volume from Sequence ! Actual Inj Volume : 3 µl
Acq. Method    : C:\CHEM32\1\DATA\ZHU\NAOYUKI_LC 2014-04-07 18-21-07\01-30.M
Last changed   : 4/7/2014 7:12:51 PM by YMW
                (modified after loading)
Analysis Method: C:\CHEM32\1\METHODS\YMWHEXANES_PT8.M
Last changed   : 9/22/2014 2:11:03 AM by RZ
                (modified after loading)
    
```

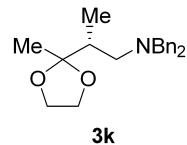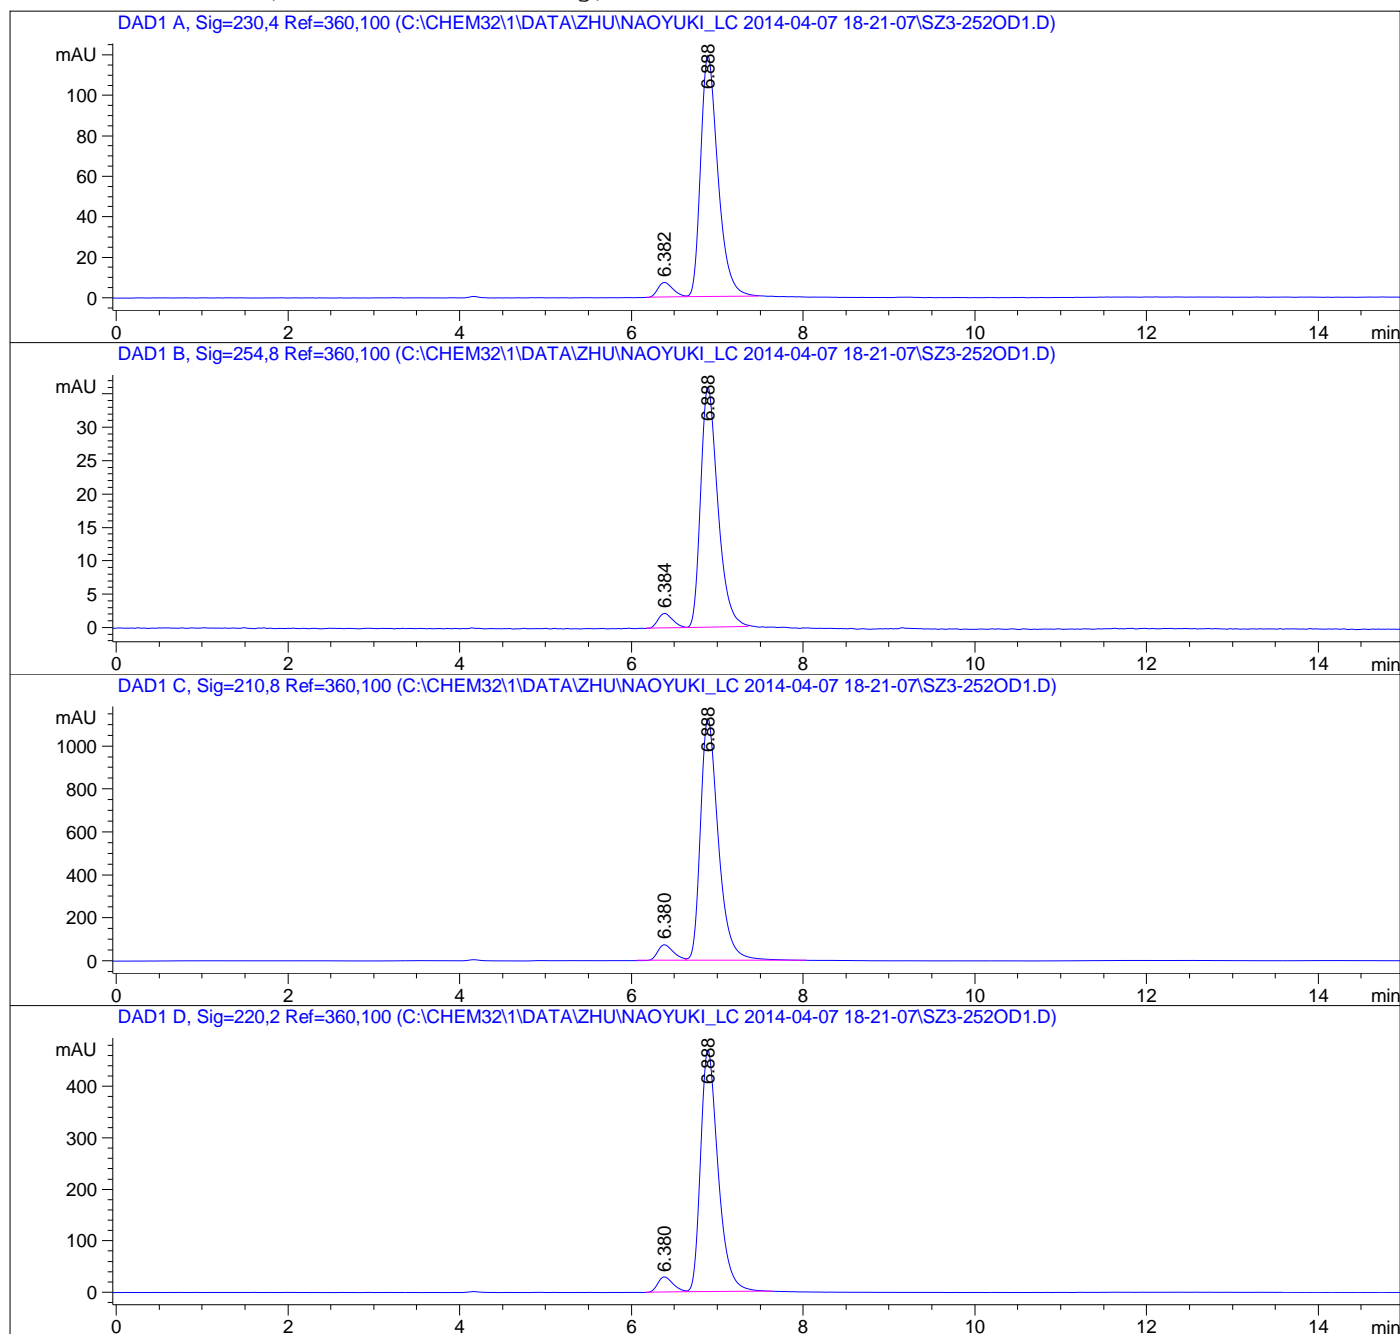

Data File C:\CHEM32\1\DATA\ZHU\NAOYUKI\_LC 2014-04-07 18-21-07\SZ3-252OD1.D  
 Sample Name: 3-252

=====  
 Area Percent Report  
 =====

Sorted By : Signal  
 Multiplier: : 1.0000  
 Dilution: : 1.0000  
 Use Multiplier & Dilution Factor with ISTDs

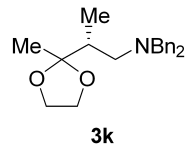

Signal 1: DAD1 A, Sig=230,4 Ref=360,100

| Peak # | RetTime [min] | Type | Width [min] | Area [mAU*s] | Height [mAU] | Area %  |
|--------|---------------|------|-------------|--------------|--------------|---------|
| 1      | 6.382         | BV   | 0.1917      | 91.64030     | 7.33679      | 5.1899  |
| 2      | 6.888         | VB   | 0.2158      | 1674.10181   | 119.23196    | 94.8101 |

Totals : 1765.74211 126.56875

Signal 2: DAD1 B, Sig=254,8 Ref=360,100

| Peak # | RetTime [min] | Type | Width [min] | Area [mAU*s] | Height [mAU] | Area %  |
|--------|---------------|------|-------------|--------------|--------------|---------|
| 1      | 6.384         | BV   | 0.1815      | 26.65181     | 2.19751      | 5.0407  |
| 2      | 6.888         | VB   | 0.2106      | 502.08493    | 36.01976     | 94.9593 |

Totals : 528.73674 38.21727

Signal 3: DAD1 C, Sig=210,8 Ref=360,100

| Peak # | RetTime [min] | Type | Width [min] | Area [mAU*s] | Height [mAU] | Area %  |
|--------|---------------|------|-------------|--------------|--------------|---------|
| 1      | 6.380         | BV   | 0.1995      | 955.51025    | 73.59778     | 5.5246  |
| 2      | 6.888         | VB   | 0.2211      | 1.63400e4    | 1127.59973   | 94.4754 |

Totals : 1.72955e4 1201.19751

Signal 4: DAD1 D, Sig=220,2 Ref=360,100

| Peak # | RetTime [min] | Type | Width [min] | Area [mAU*s] | Height [mAU] | Area %  |
|--------|---------------|------|-------------|--------------|--------------|---------|
| 1      | 6.380         | BV   | 0.1947      | 374.99472    | 29.82014     | 5.3070  |
| 2      | 6.888         | VB   | 0.2180      | 6691.02588   | 470.33362    | 94.6930 |

Data File C:\CHEM32\1\DATA\ZHU\ZY 2014-03-10 12-55-32\3-211OJ10ETOH.D

Sample Name: 3-211RAC

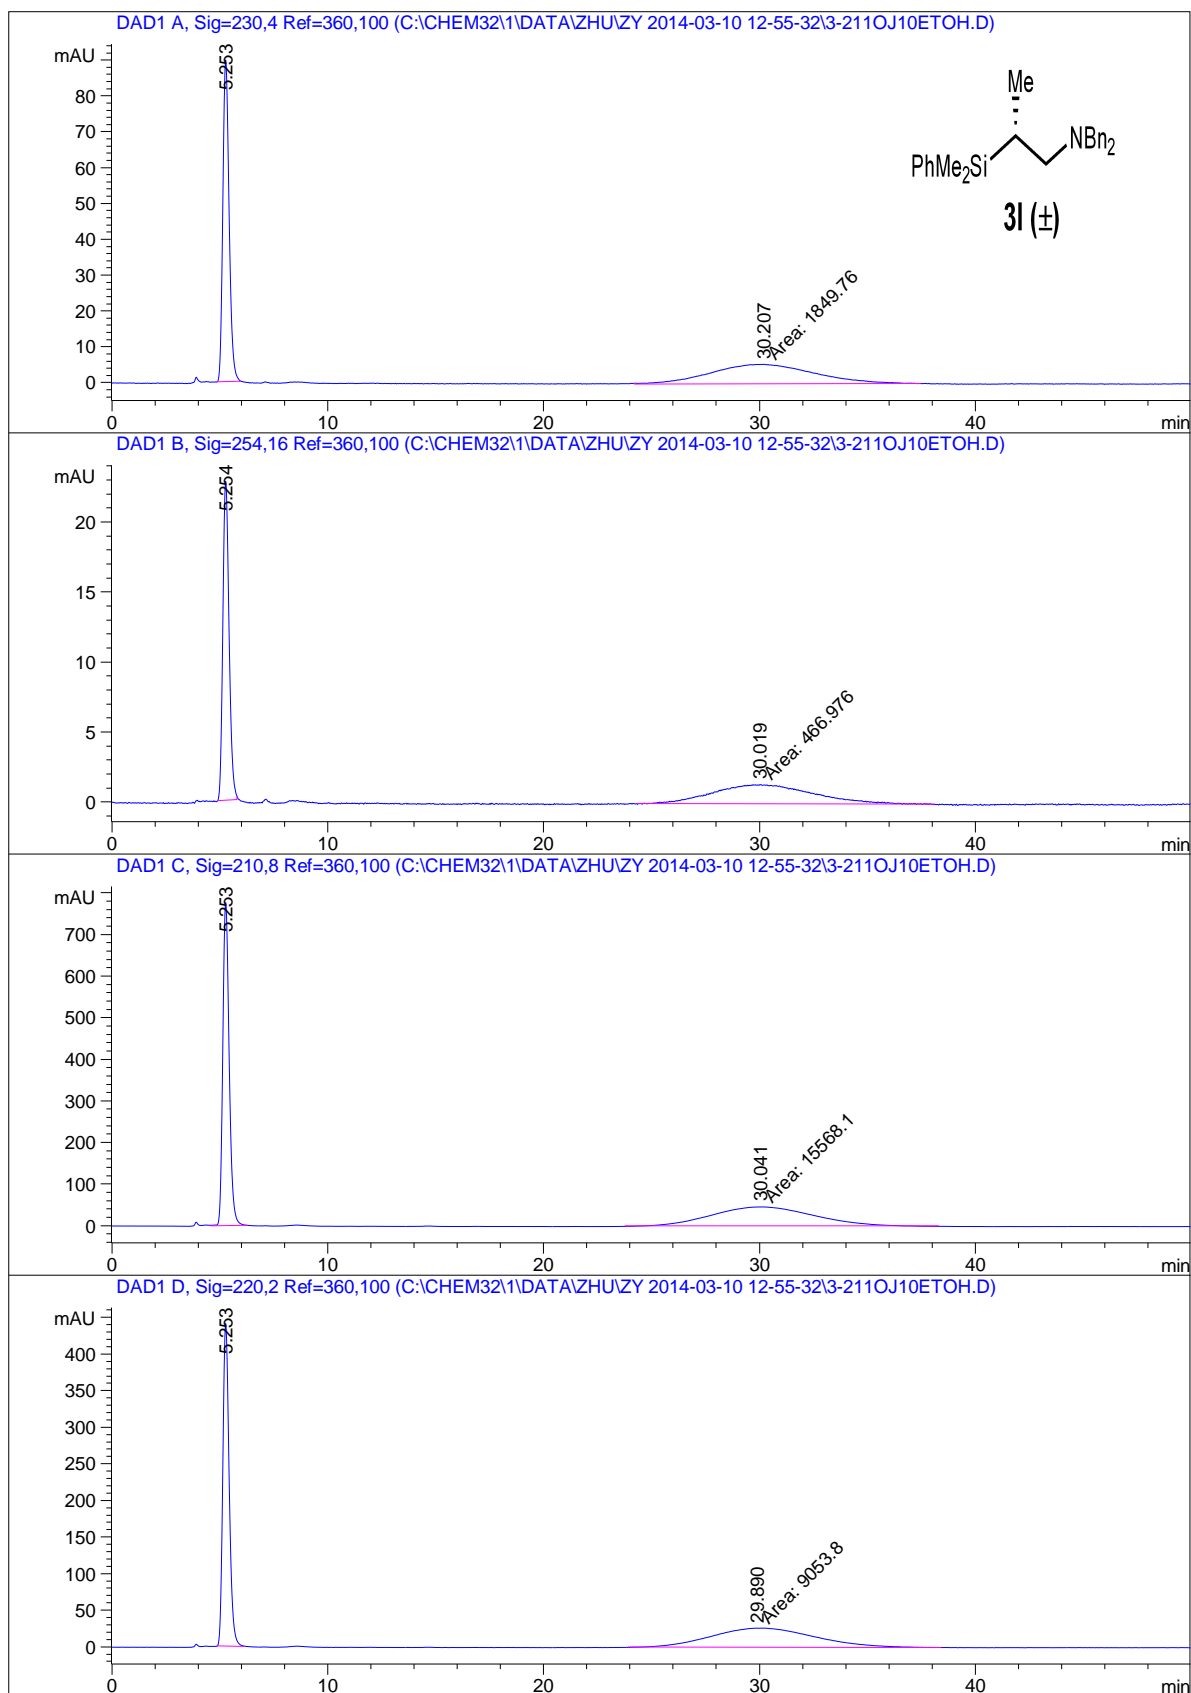

Data File C:\CHEM32\1\DATA\ZHU\ZY 2014-03-10 12-55-32\3-2110J10ETOH.D  
 Sample Name: 3-211RAC

=====  
 Area Percent Report  
 =====

Sorted By : Signal  
 Multiplier: : 1.0000  
 Dilution: : 1.0000  
 Use Multiplier & Dilution Factor with ISTDs

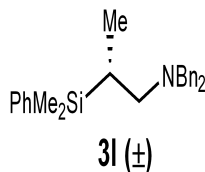

Signal 1: DAD1 A, Sig=230,4 Ref=360,100

| Peak # | RetTime [min] | Type | Width [min] | Area [mAU*s] | Height [mAU] | Area %  |
|--------|---------------|------|-------------|--------------|--------------|---------|
| 1      | 5.253         | BB   | 0.3134      | 1810.60059   | 89.75002     | 49.4651 |
| 2      | 30.207        | MM   | 5.6198      | 1849.75610   | 5.48583      | 50.5349 |

Totals : 3660.35669 95.23585

Signal 2: DAD1 B, Sig=254,16 Ref=360,100

| Peak # | RetTime [min] | Type | Width [min] | Area [mAU*s] | Height [mAU] | Area %  |
|--------|---------------|------|-------------|--------------|--------------|---------|
| 1      | 5.254         | BB   | 0.3094      | 456.14359    | 22.80404     | 49.4133 |
| 2      | 30.019        | MM   | 5.5441      | 466.97586    | 1.40382      | 50.5867 |

Totals : 923.11945 24.20785

Signal 3: DAD1 C, Sig=210,8 Ref=360,100

| Peak # | RetTime [min] | Type | Width [min] | Area [mAU*s] | Height [mAU] | Area %  |
|--------|---------------|------|-------------|--------------|--------------|---------|
| 1      | 5.253         | VB   | 0.3152      | 1.59315e4    | 777.19598    | 50.5770 |
| 2      | 30.041        | MM   | 5.5647      | 1.55681e4    | 46.62746     | 49.4230 |

Totals : 3.14996e4 823.82344

Signal 4: DAD1 D, Sig=220,2 Ref=360,100

| Peak # | RetTime [min] | Type | Width [min] | Area [mAU*s] | Height [mAU] | Area %  |
|--------|---------------|------|-------------|--------------|--------------|---------|
| 1      | 5.253         | BB   | 0.3150      | 8955.75098   | 440.87912    | 49.7278 |
| 2      | 29.890        | MM   | 5.6707      | 9053.79785   | 26.60979     | 50.2722 |

Data File C:\CHEM32\1\DATA\ZHU\ZY 2014-03-10 12-55-32\3-218OJ10ETOH.D

Sample Name: 3-218

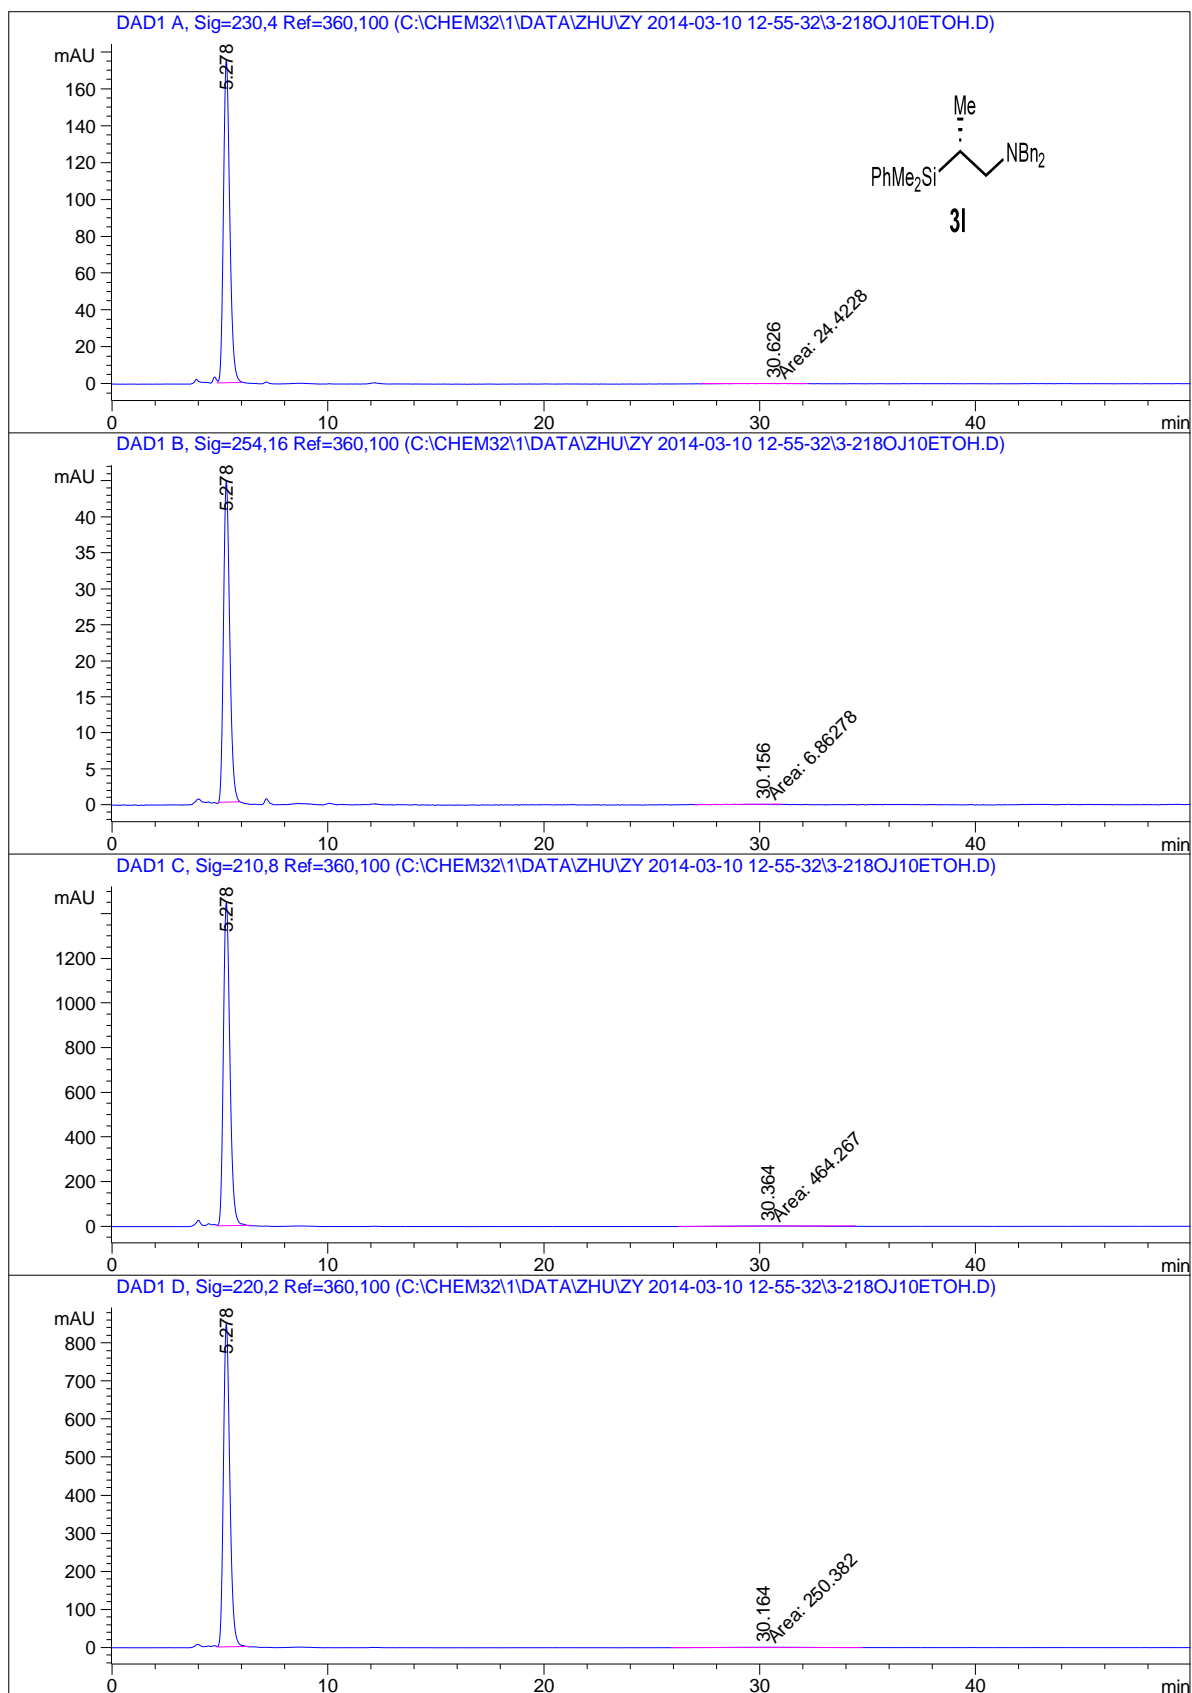

Data File C:\CHEM32\1\DATA\ZHU\ZY 2014-03-10 12-55-32\3-218OJ10ETOH.D  
 Sample Name: 3-218

=====  
 Area Percent Report  
 =====

Sorted By : Signal  
 Multiplier: : 1.0000  
 Dilution: : 1.0000  
 Use Multiplier & Dilution Factor with ISTDs

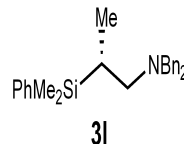

Signal 1: DAD1 A, Sig=230,4 Ref=360,100

| Peak # | RetTime [min] | Type | Width [min] | Area [mAU*s] | Height [mAU] | Area %  |
|--------|---------------|------|-------------|--------------|--------------|---------|
| 1      | 5.278         | VB   | 0.3138      | 3536.63086   | 175.01091    | 99.3142 |
| 2      | 30.626        | MM   | 2.2764      | 24.42280     | 1.78810e-1   | 0.6858  |

Totals : 3561.05366 175.18972

Signal 2: DAD1 B, Sig=254,16 Ref=360,100

| Peak # | RetTime [min] | Type | Width [min] | Area [mAU*s] | Height [mAU] | Area %  |
|--------|---------------|------|-------------|--------------|--------------|---------|
| 1      | 5.278         | BB   | 0.3074      | 892.93890    | 44.63043     | 99.2373 |
| 2      | 30.156        | MM   | 1.6283      | 6.86278      | 7.02433e-2   | 0.7627  |

Totals : 899.80169 44.70067

Signal 3: DAD1 C, Sig=210,8 Ref=360,100

| Peak # | RetTime [min] | Type | Width [min] | Area [mAU*s] | Height [mAU] | Area %  |
|--------|---------------|------|-------------|--------------|--------------|---------|
| 1      | 5.278         | VB   | 0.3263      | 3.03231e4    | 1448.36890   | 98.4920 |
| 2      | 30.364        | MM   | 4.0549      | 464.26703    | 1.90824      | 1.5080  |

Totals : 3.07874e4 1450.27713

Signal 4: DAD1 D, Sig=220,2 Ref=360,100

| Peak # | RetTime [min] | Type | Width [min] | Area [mAU*s] | Height [mAU] | Area %  |
|--------|---------------|------|-------------|--------------|--------------|---------|
| 1      | 5.278         | VB   | 0.3174      | 1.74321e4    | 849.66962    | 98.5840 |
| 2      | 30.164        | MM   | 3.7076      | 250.38232    | 1.12554      | 1.4160  |

Data File C:\CHEM32\1\DATA\ZHU\NAOYUKI\_LC 2014-05-30 10-28-50\SZ4-61-2IA5\_.D  
Sample Name: 4-61-2RAC

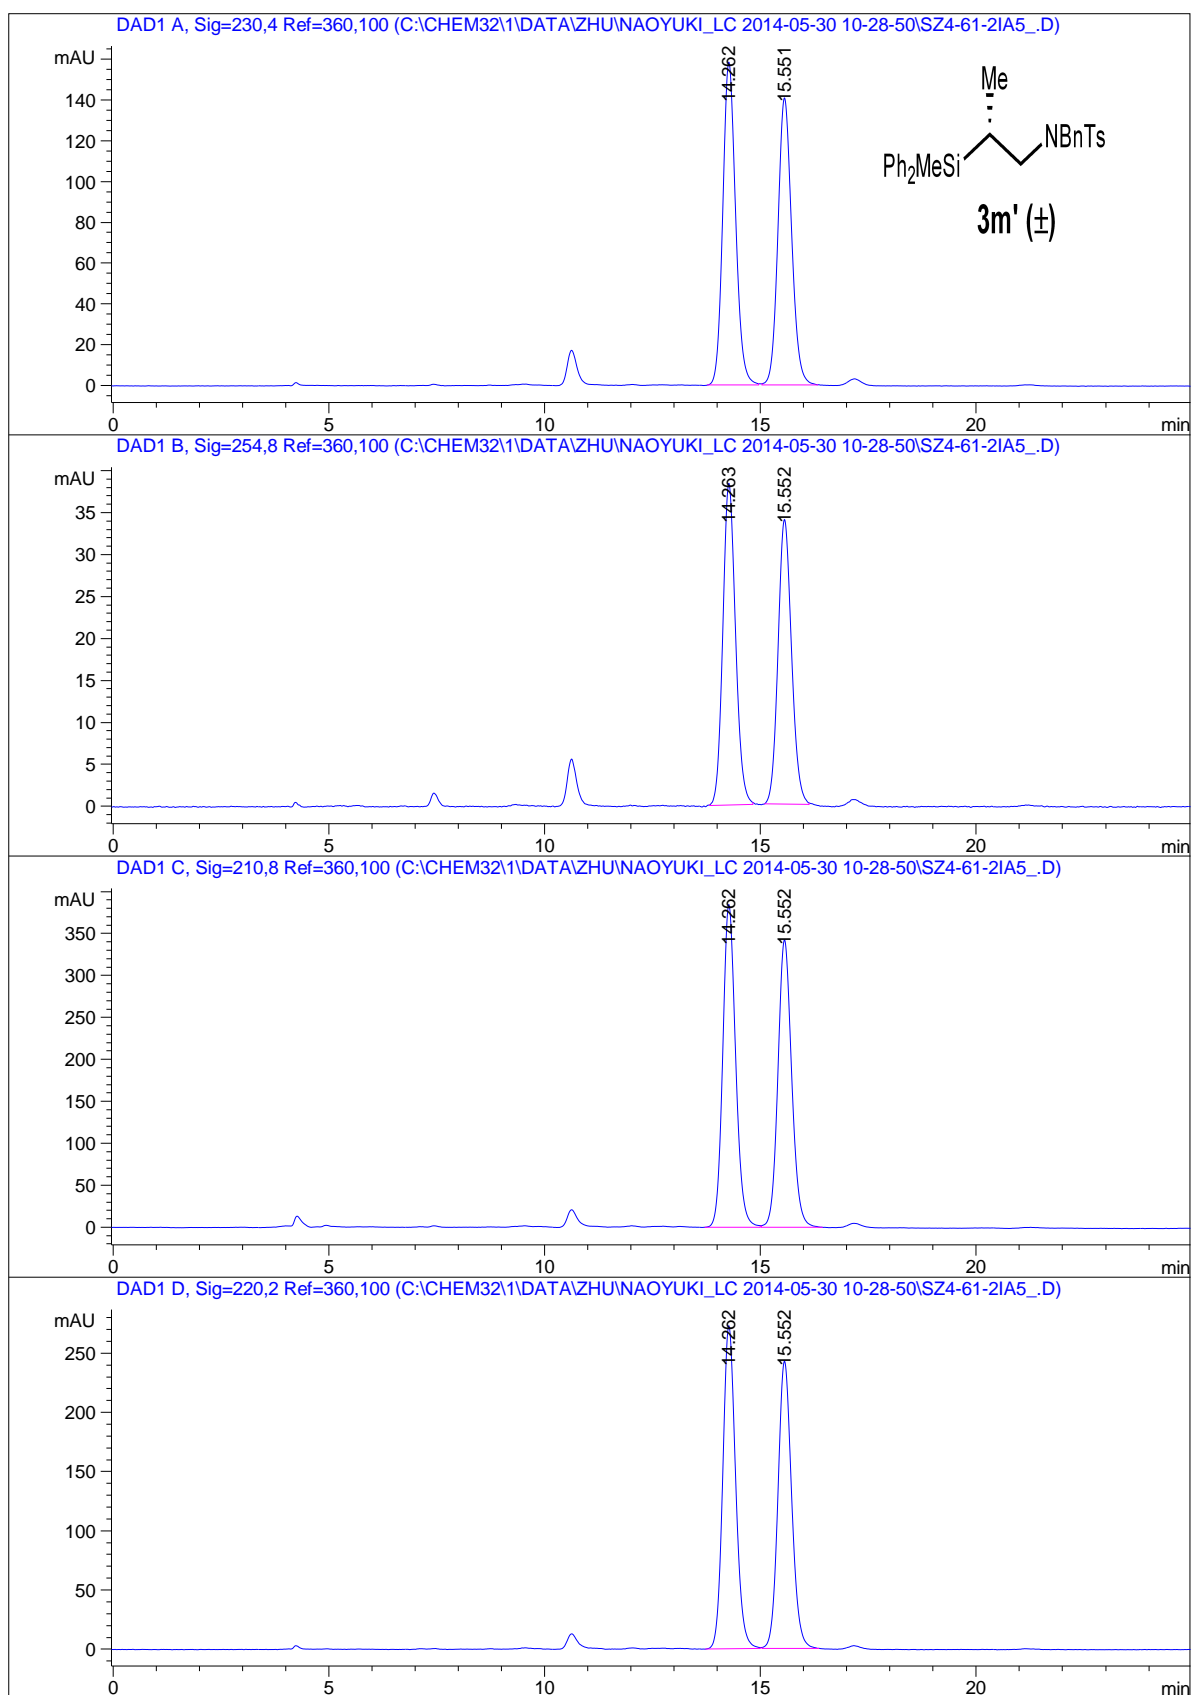

Data File C:\CHEM32\1\DATA\ZHU\NAOYUKI\_LC 2014-05-30 10-28-50\SZ4-61-2IA5\_.D  
 Sample Name: 4-61-2RAC

=====  
 Area Percent Report  
 =====

Sorted By : Signal  
 Multiplier: : 1.0000  
 Dilution: : 1.0000  
 Use Multiplier & Dilution Factor with ISTDs

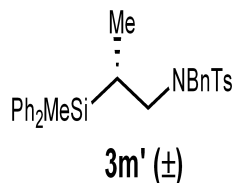

Signal 1: DAD1 A, Sig=230,4 Ref=360,100

| Peak # | RetTime [min] | Type | Width [min] | Area [mAU*s] | Height [mAU] | Area %  |
|--------|---------------|------|-------------|--------------|--------------|---------|
| 1      | 14.262        | BB   | 0.3173      | 3276.59888   | 158.39804    | 51.3558 |
| 2      | 15.551        | BB   | 0.3371      | 3103.59375   | 140.83565    | 48.6442 |

Totals : 6380.19263 299.23369

Signal 2: DAD1 B, Sig=254,8 Ref=360,100

| Peak # | RetTime [min] | Type | Width [min] | Area [mAU*s] | Height [mAU] | Area %  |
|--------|---------------|------|-------------|--------------|--------------|---------|
| 1      | 14.263        | BB   | 0.3170      | 786.13989    | 38.37450     | 51.5868 |
| 2      | 15.552        | BB   | 0.3296      | 737.77618    | 33.94649     | 48.4132 |

Totals : 1523.91608 72.32099

Signal 3: DAD1 C, Sig=210,8 Ref=360,100

| Peak # | RetTime [min] | Type | Width [min] | Area [mAU*s] | Height [mAU] | Area %  |
|--------|---------------|------|-------------|--------------|--------------|---------|
| 1      | 14.262        | BB   | 0.3183      | 7989.08789   | 384.71436    | 51.2629 |
| 2      | 15.552        | BB   | 0.3406      | 7595.45996   | 342.71686    | 48.7371 |

Totals : 1.55845e4 727.43121

Signal 4: DAD1 D, Sig=220,2 Ref=360,100

| Peak # | RetTime [min] | Type | Width [min] | Area [mAU*s] | Height [mAU] | Area %  |
|--------|---------------|------|-------------|--------------|--------------|---------|
| 1      | 14.262        | BB   | 0.3196      | 5653.62598   | 273.03476    | 51.3449 |
| 2      | 15.552        | BB   | 0.3392      | 5357.45166   | 242.98187    | 48.6551 |



Data File C:\CHEM32\1\DATA\ZHU\NAOYUKI\_LC 2014-05-30 10-28-50\4-81-1-2AI5.D

Sample Name: 4-81-1-2

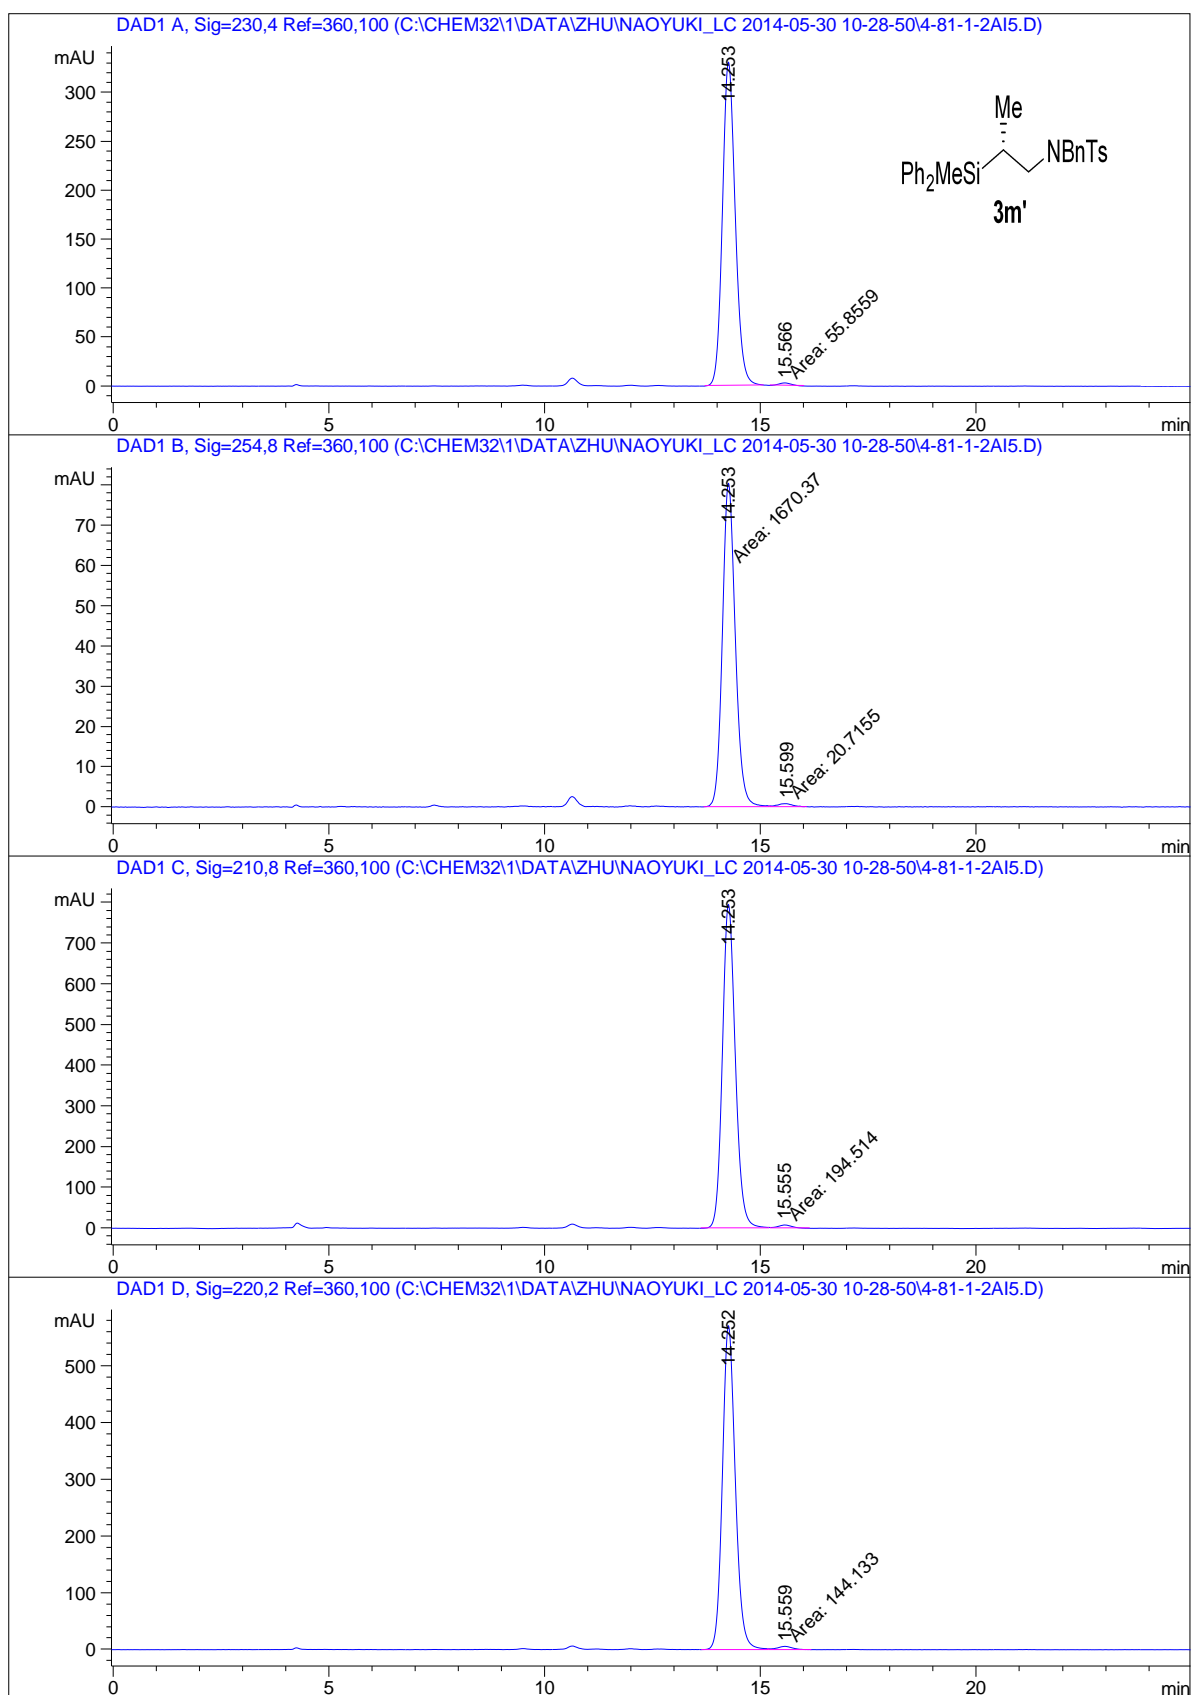

Data File C:\CHEM32\1\DATA\ZHU\NAOYUKI\_LC 2014-05-30 10-28-50\4-81-1-2A15.D  
 Sample Name: 4-81-1-2

=====  
 Area Percent Report  
 =====

Sorted By : Signal  
 Multiplier: : 1.0000  
 Dilution: : 1.0000  
 Use Multiplier & Dilution Factor with ISTDs

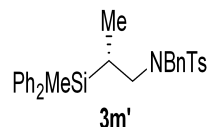

Signal 1: DAD1 A, Sig=230,4 Ref=360,100

| Peak # | RetTime [min] | Type | Width [min] | Area [mAU*s] | Height [mAU] | Area %  |
|--------|---------------|------|-------------|--------------|--------------|---------|
| 1      | 14.253        | BB   | 0.3171      | 6833.45313   | 330.68152    | 99.1892 |
| 2      | 15.566        | MF   | 0.3357      | 55.85593     | 2.77319      | 0.8108  |

Totals : 6889.30906 333.45471

Signal 2: DAD1 B, Sig=254,8 Ref=360,100

| Peak # | RetTime [min] | Type | Width [min] | Area [mAU*s] | Height [mAU] | Area %  |
|--------|---------------|------|-------------|--------------|--------------|---------|
| 1      | 14.253        | MF   | 0.3463      | 1670.36633   | 80.39221     | 98.7750 |
| 2      | 15.599        | MF   | 0.4315      | 20.71545     | 8.00069e-1   | 1.2250  |

Totals : 1691.08179 81.19228

Signal 3: DAD1 C, Sig=210,8 Ref=360,100

| Peak # | RetTime [min] | Type | Width [min] | Area [mAU*s] | Height [mAU] | Area %  |
|--------|---------------|------|-------------|--------------|--------------|---------|
| 1      | 14.253        | BB   | 0.3197      | 1.66140e4    | 795.44727    | 98.8428 |
| 2      | 15.555        | MF   | 0.3941      | 194.51379    | 8.22592      | 1.1572  |

Totals : 1.68085e4 803.67319

Signal 4: DAD1 D, Sig=220,2 Ref=360,100

| Peak # | RetTime [min] | Type | Width [min] | Area [mAU*s] | Height [mAU] | Area %  |
|--------|---------------|------|-------------|--------------|--------------|---------|
| 1      | 14.252        | BB   | 0.3183      | 1.18621e4    | 571.17639    | 98.7995 |
| 2      | 15.559        | MF   | 0.4094      | 144.13342    | 5.86796      | 1.2005  |

Data File C:\CHEM32\1\DATA\ZHU\NAOYUKI\_LC 2014-05-17 03-09-27\SZ4-21-2OD1.D

Sample Name: 4-21-2RAC

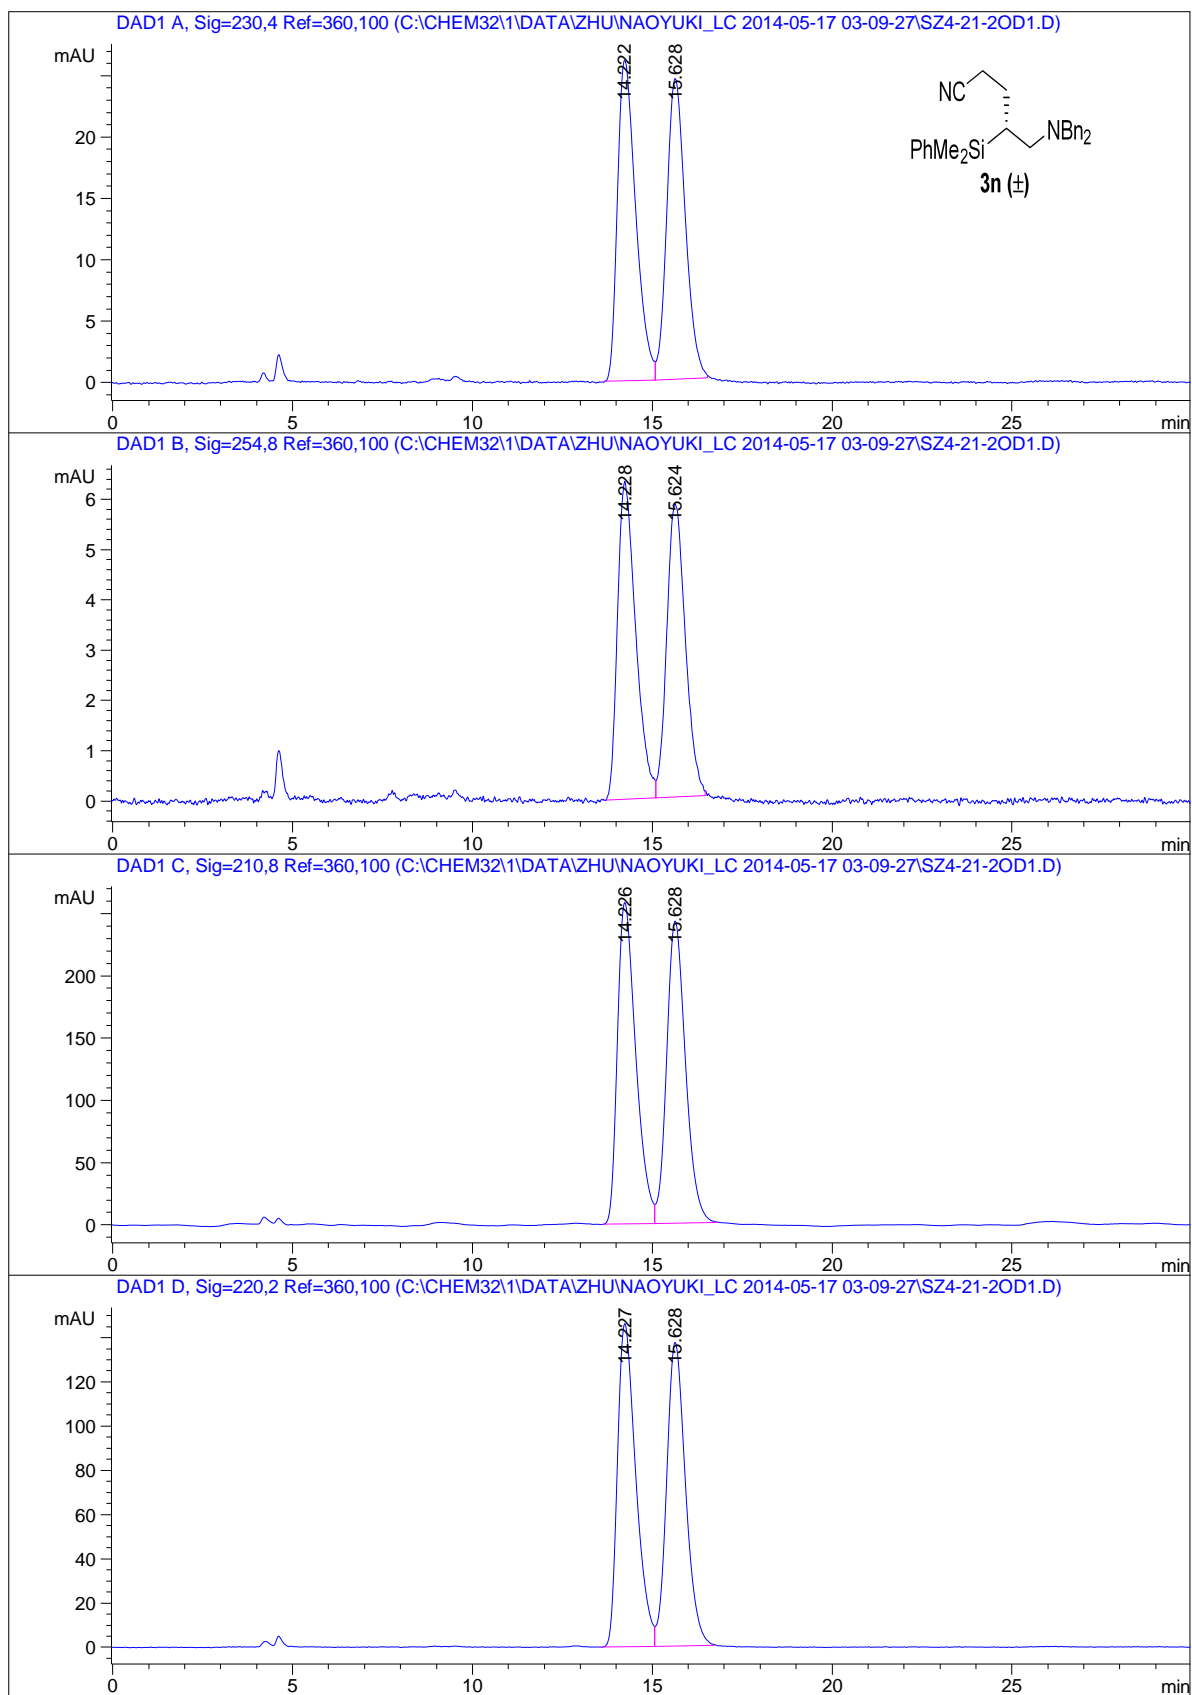

Data File C:\CHEM32\1\DATA\ZHU\NAOYUKI\_LC 2014-05-17 03-09-27\SZ4-21-20D1.D  
 Sample Name: 4-21-2RAC

=====  
 Area Percent Report  
 =====

Sorted By : Signal  
 Multiplier: : 1.0000  
 Dilution: : 1.0000  
 Use Multiplier & Dilution Factor with ISTDs

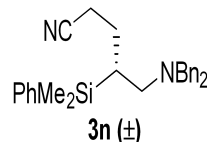

Signal 1: DAD1 A, Sig=230,4 Ref=360,100

| Peak # | RetTime [min] | Type | Width [min] | Area [mAU*s] | Height [mAU] | Area %  |
|--------|---------------|------|-------------|--------------|--------------|---------|
| 1      | 14.222        | BV   | 0.5140      | 927.95947    | 26.14884     | 51.2282 |
| 2      | 15.628        | VB   | 0.5265      | 883.46454    | 24.51157     | 48.7718 |

Totals : 1811.42401 50.66042

Signal 2: DAD1 B, Sig=254,8 Ref=360,100

| Peak # | RetTime [min] | Type | Width [min] | Area [mAU*s] | Height [mAU] | Area %  |
|--------|---------------|------|-------------|--------------|--------------|---------|
| 1      | 14.228        | BB   | 0.4348      | 222.80185    | 6.32782      | 51.4374 |
| 2      | 15.624        | BB   | 0.4404      | 210.34926    | 5.83743      | 48.5626 |

Totals : 433.15111 12.16525

Signal 3: DAD1 C, Sig=210,8 Ref=360,100

| Peak # | RetTime [min] | Type | Width [min] | Area [mAU*s] | Height [mAU] | Area %  |
|--------|---------------|------|-------------|--------------|--------------|---------|
| 1      | 14.226        | BV   | 0.5461      | 9162.54004   | 258.14984    | 50.8466 |
| 2      | 15.628        | VB   | 0.5620      | 8857.43164   | 242.59326    | 49.1534 |

Totals : 1.80200e4 500.74310

Signal 4: DAD1 D, Sig=220,2 Ref=360,100

| Peak # | RetTime [min] | Type | Width [min] | Area [mAU*s] | Height [mAU] | Area %  |
|--------|---------------|------|-------------|--------------|--------------|---------|
| 1      | 14.227        | BV   | 0.5394      | 5203.21777   | 146.14958    | 50.8819 |
| 2      | 15.628        | VB   | 0.5486      | 5022.84961   | 137.37509    | 49.1181 |

Data File C:\CHEM32\1\DATA\ZHU\NAOYUKI\_LC 2014-05-17 03-09-27\SZ4-53-1OD1.D

Sample Name: 4-53-1

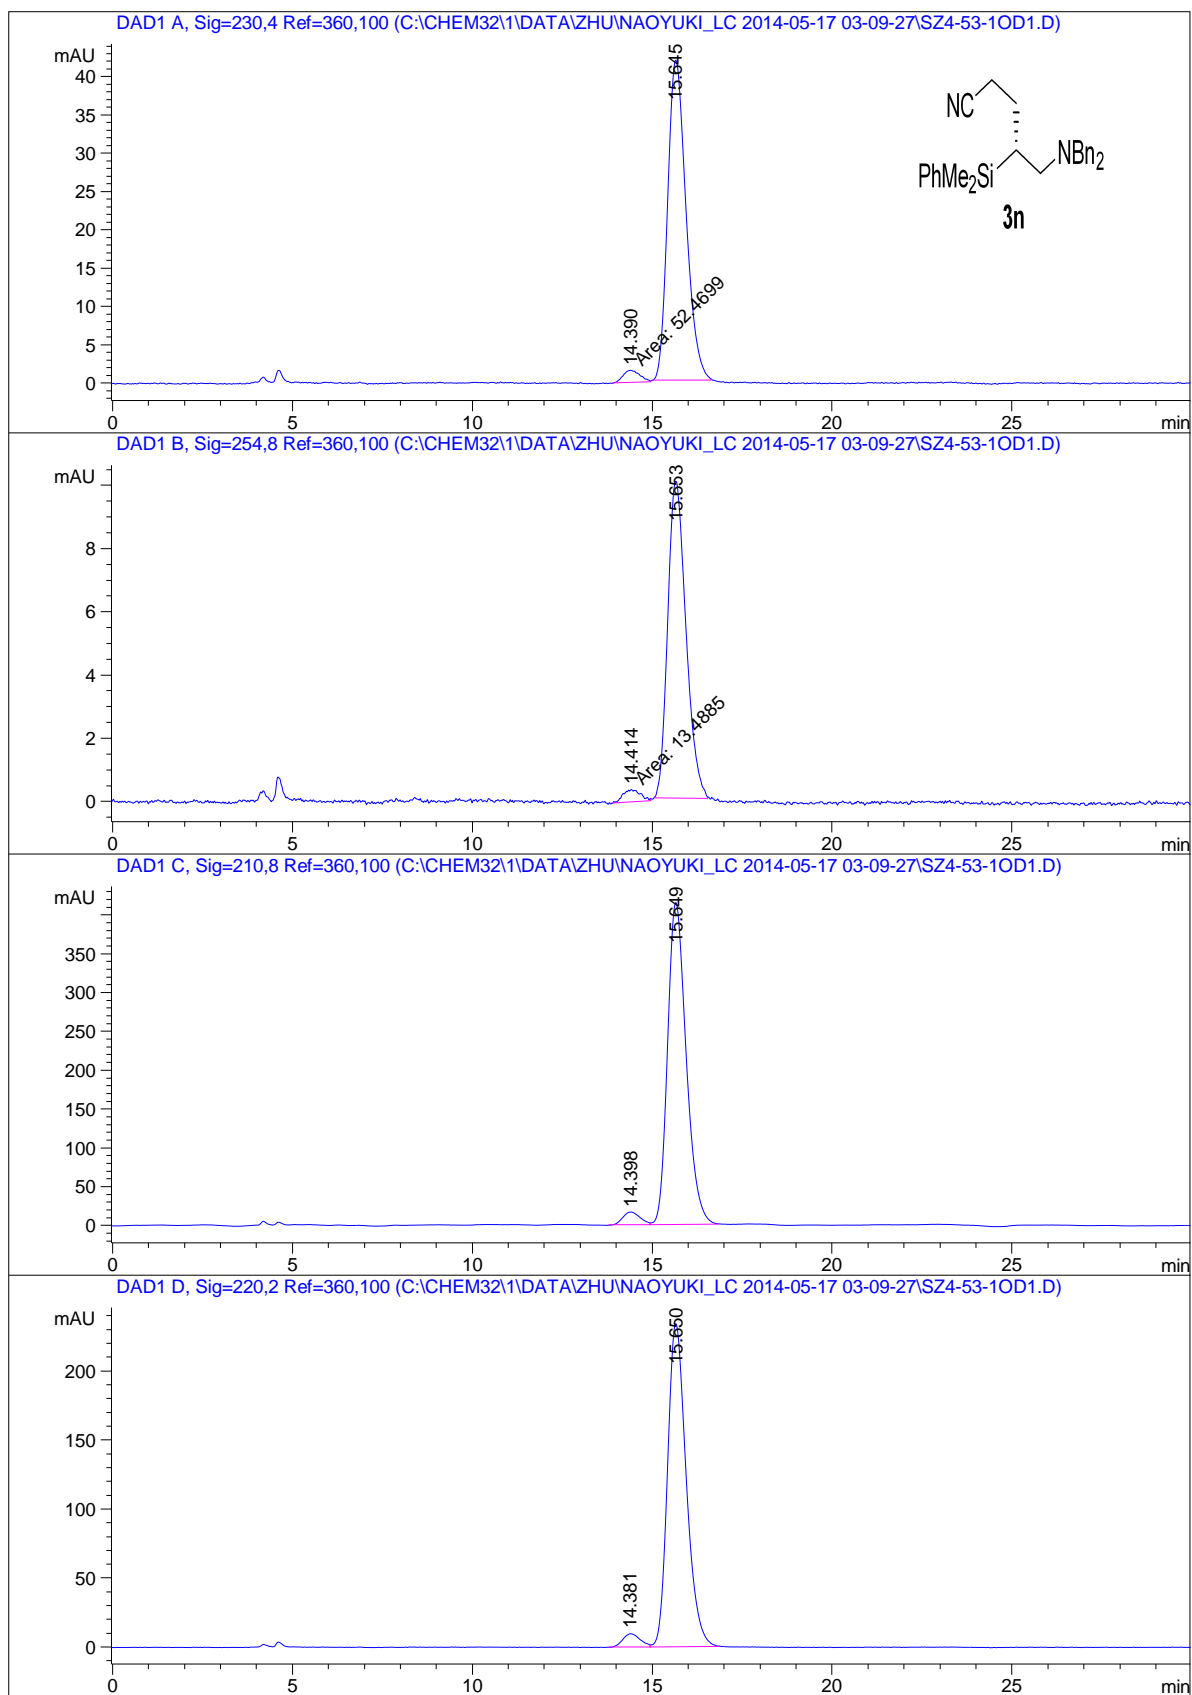

Data File C:\CHEM32\1\DATA\ZHU\NAOYUKI\_LC 2014-05-17 03-09-27\SZ4-53-10D1.D  
 Sample Name: 4-53-1

=====  
 Area Percent Report  
 =====

Sorted By : Signal  
 Multiplier: : 1.0000  
 Dilution: : 1.0000  
 Use Multiplier & Dilution Factor with ISTDs

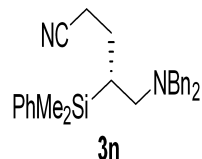

Signal 1: DAD1 A, Sig=230,4 Ref=360,100

| Peak # | RetTime [min] | Type | Width [min] | Area [mAU*s] | Height [mAU] | Area %  |
|--------|---------------|------|-------------|--------------|--------------|---------|
| 1      | 14.390        | MM   | 0.5471      | 52.46988     | 1.59844      | 3.4146  |
| 2      | 15.645        | BB   | 0.5403      | 1484.15869   | 41.79713     | 96.5854 |

Totals : 1536.62857 43.39557

Signal 2: DAD1 B, Sig=254,8 Ref=360,100

| Peak # | RetTime [min] | Type | Width [min] | Area [mAU*s] | Height [mAU] | Area %  |
|--------|---------------|------|-------------|--------------|--------------|---------|
| 1      | 14.414        | MM   | 0.5632      | 13.48845     | 3.99188e-1   | 3.6808  |
| 2      | 15.653        | BB   | 0.4628      | 352.96774    | 10.02484     | 96.3192 |

Totals : 366.45619 10.42403

Signal 3: DAD1 C, Sig=210,8 Ref=360,100

| Peak # | RetTime [min] | Type | Width [min] | Area [mAU*s] | Height [mAU] | Area %  |
|--------|---------------|------|-------------|--------------|--------------|---------|
| 1      | 14.398        | BV   | 0.4126      | 566.09344    | 16.73867     | 3.6655  |
| 2      | 15.649        | VB   | 0.5506      | 1.48779e4    | 414.64716    | 96.3345 |

Totals : 1.54440e4 431.38582

Signal 4: DAD1 D, Sig=220,2 Ref=360,100

| Peak # | RetTime [min] | Type | Width [min] | Area [mAU*s] | Height [mAU] | Area %  |
|--------|---------------|------|-------------|--------------|--------------|---------|
| 1      | 14.381        | VV   | 0.4185      | 332.07535    | 9.72232      | 3.7914  |
| 2      | 15.650        | VB   | 0.5420      | 8426.56348   | 234.07680    | 96.2086 |

Data File C:\CHEM32\2\DATA\ZHU\HPLC 2014-07-18 20-26-05\4-117OD950521.D

Sample Name: 4-117RAC

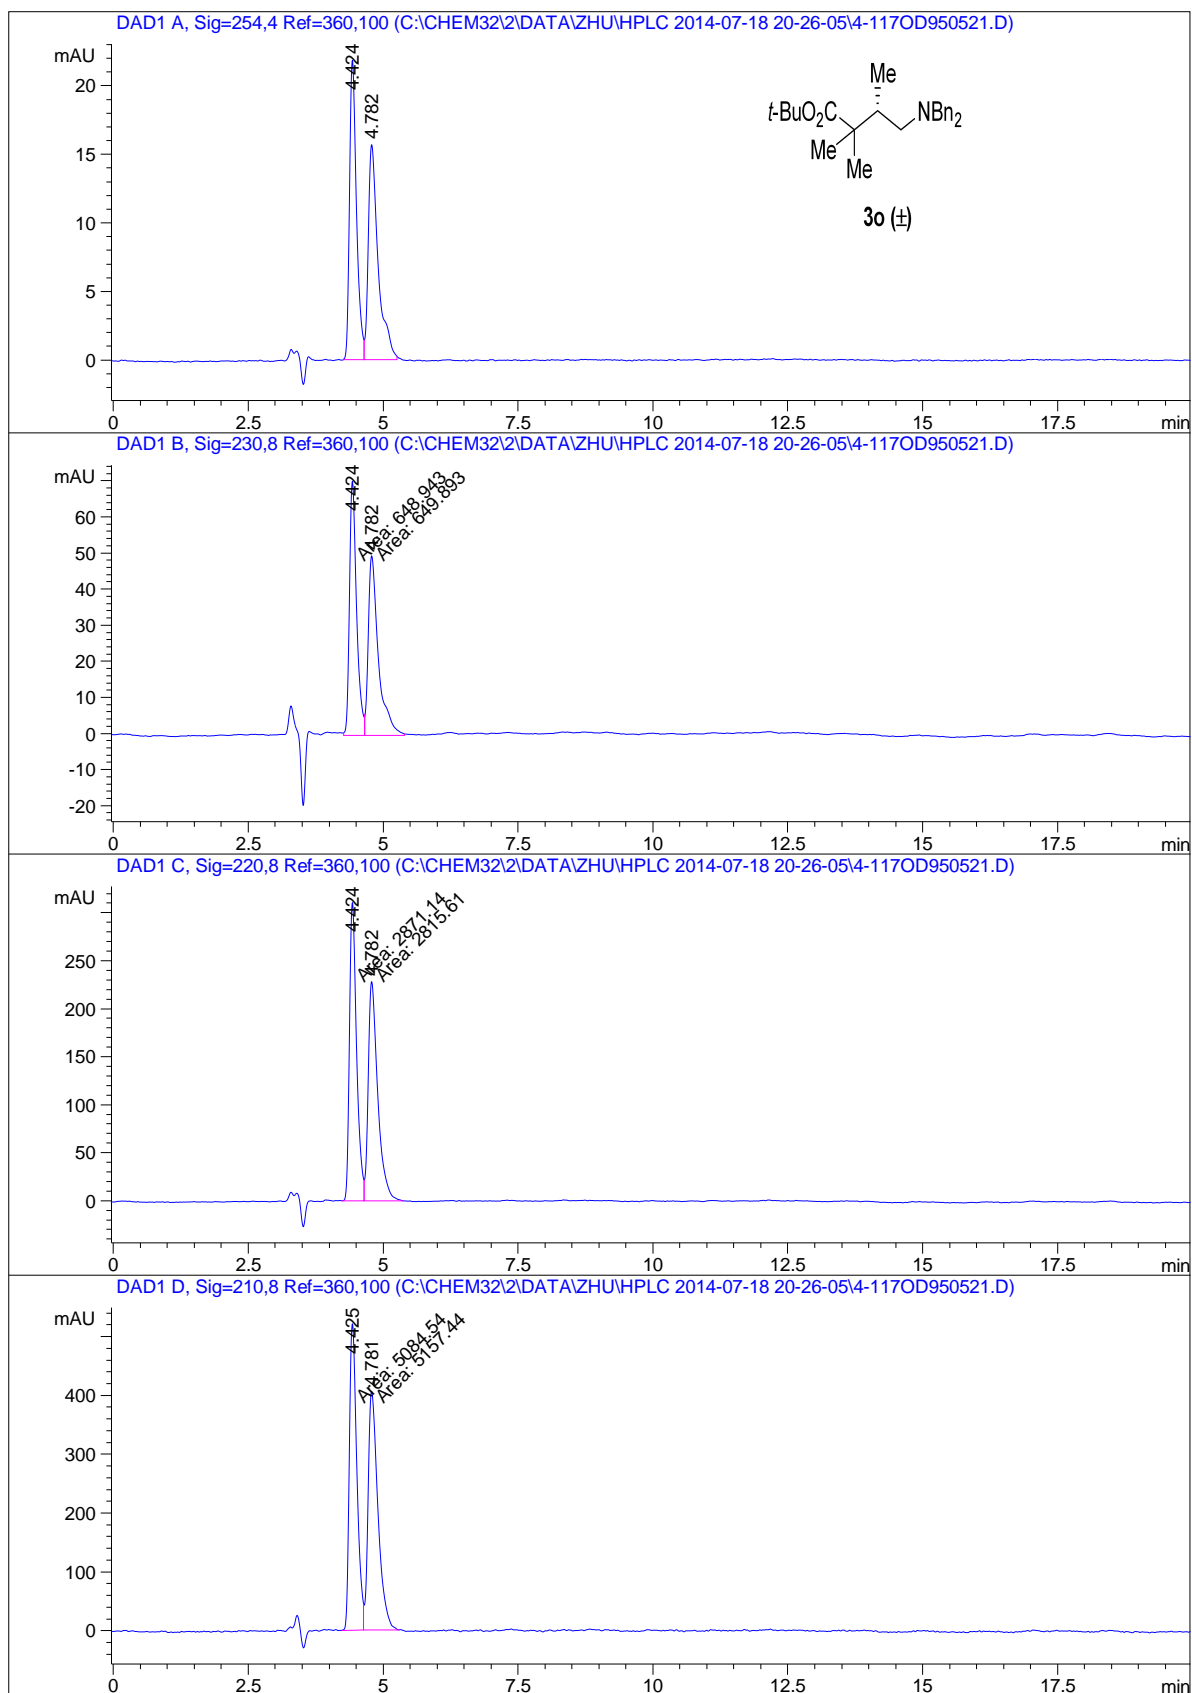

Data File C:\CHEM32\2\DATA\ZHU\HPLC 2014-07-18 20-26-05\4-117OD950521.D  
 Sample Name: 4-117RAC

=====  
 Area Percent Report  
 =====

Sorted By : Signal  
 Multiplier: : 1.0000  
 Dilution: : 1.0000  
 Use Multiplier & Dilution Factor with ISTDs

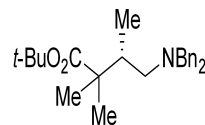

30 (±)

Signal 1: DAD1 A, Sig=254,4 Ref=360,100

| Peak # | RetTime [min] | Type | Width [min] | Area [mAU*s] | Height [mAU] | Area %  |
|--------|---------------|------|-------------|--------------|--------------|---------|
| 1      | 4.424         | BV   | 0.1367      | 196.36861    | 21.87259     | 49.3447 |
| 2      | 4.782         | VB   | 0.1877      | 201.58443    | 15.70866     | 50.6553 |

Totals : 397.95303 37.58125

Signal 2: DAD1 B, Sig=230,8 Ref=360,100

| Peak # | RetTime [min] | Type | Width [min] | Area [mAU*s] | Height [mAU] | Area %  |
|--------|---------------|------|-------------|--------------|--------------|---------|
| 1      | 4.424         | MF   | 0.1533      | 648.94250    | 70.54516     | 49.9634 |
| 2      | 4.782         | FM   | 0.2172      | 649.89270    | 49.85861     | 50.0366 |

Totals : 1298.83521 120.40377

Signal 3: DAD1 C, Sig=220,8 Ref=360,100

| Peak # | RetTime [min] | Type | Width [min] | Area [mAU*s] | Height [mAU] | Area %  |
|--------|---------------|------|-------------|--------------|--------------|---------|
| 1      | 4.424         | MF   | 0.1536      | 2871.13794   | 311.48721    | 50.4882 |
| 2      | 4.782         | FM   | 0.2049      | 2815.61304   | 229.05534    | 49.5118 |

Totals : 5686.75098 540.54256

Signal 4: DAD1 D, Sig=210,8 Ref=360,100

| Peak # | RetTime [min] | Type | Width [min] | Area [mAU*s] | Height [mAU] | Area %  |
|--------|---------------|------|-------------|--------------|--------------|---------|
| 1      | 4.425         | MF   | 0.1624      | 5084.54199   | 521.81342    | 49.6441 |
| 2      | 4.781         | FM   | 0.2115      | 5157.44141   | 406.51172    | 50.3559 |



Data File C:\CHEM32\2\DATA\ZHU\HPLC 2014-07-18 20-26-05\4-221OD950521.D

Sample Name: 4-221OD

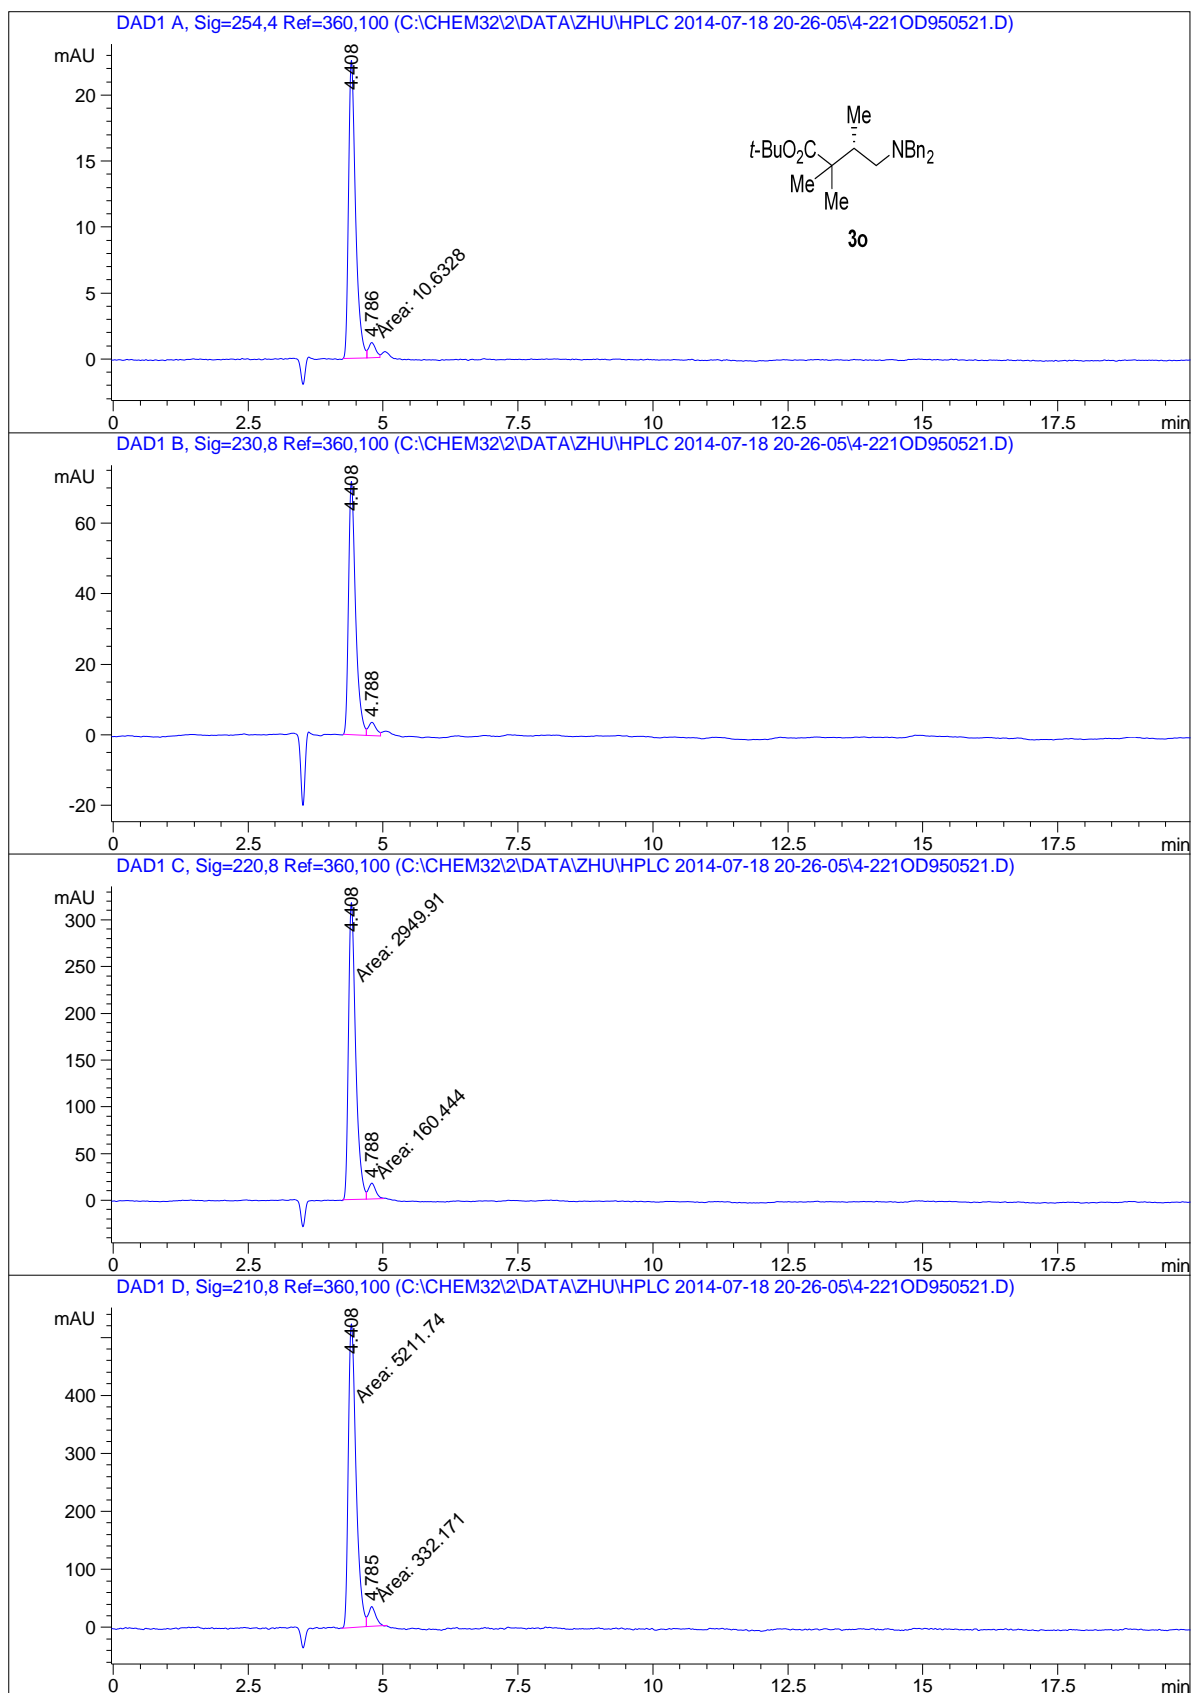

Data File C:\CHEM32\2\DATA\ZHU\HPLC 2014-07-18 20-26-05\4-221OD950521.D  
 Sample Name: 4-221OD

=====  
 Area Percent Report  
 =====

Sorted By : Signal  
 Multiplier: : 1.0000  
 Dilution: : 1.0000  
 Use Multiplier & Dilution Factor with ISTDs

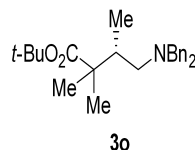

Signal 1: DAD1 A, Sig=254,4 Ref=360,100

| Peak # | RetTime [min] | Type | Width [min] | Area [mAU*s] | Height [mAU] | Area %  |
|--------|---------------|------|-------------|--------------|--------------|---------|
| 1      | 4.408         | BB   | 0.1378      | 205.27261    | 22.62688     | 95.0752 |
| 2      | 4.786         | MF   | 0.1517      | 10.63284     | 1.16812      | 4.9248  |

Totals : 215.90546 23.79500

Signal 2: DAD1 B, Sig=230,8 Ref=360,100

| Peak # | RetTime [min] | Type | Width [min] | Area [mAU*s] | Height [mAU] | Area %  |
|--------|---------------|------|-------------|--------------|--------------|---------|
| 1      | 4.408         | BV   | 0.1378      | 653.77686    | 72.08253     | 94.3939 |
| 2      | 4.788         | VV   | 0.1487      | 38.82849     | 3.81777      | 5.6061  |

Totals : 692.60534 75.90031

Signal 3: DAD1 C, Sig=220,8 Ref=360,100

| Peak # | RetTime [min] | Type | Width [min] | Area [mAU*s] | Height [mAU] | Area %  |
|--------|---------------|------|-------------|--------------|--------------|---------|
| 1      | 4.408         | MF   | 0.1545      | 2949.90649   | 318.29221    | 94.8416 |
| 2      | 4.788         | FM   | 0.1567      | 160.44371    | 17.06719     | 5.1584  |

Totals : 3110.35020 335.35939

Signal 4: DAD1 D, Sig=210,8 Ref=360,100

| Peak # | RetTime [min] | Type | Width [min] | Area [mAU*s] | Height [mAU] | Area %  |
|--------|---------------|------|-------------|--------------|--------------|---------|
| 1      | 4.408         | MF   | 0.1656      | 5211.74121   | 524.61432    | 94.0084 |
| 2      | 4.785         | FM   | 0.1590      | 332.17142    | 34.81503     | 5.9916  |

Data File C:\CHEM32\1\DATA\ERHAD\ZY 2014-09-02 01-08-37\2-2760JH5ETOH.D

Sample Name: 2-276RAC

```
=====
Acq. Operator   : RZ                               Seq. Line :    4
Acq. Instrument : Instrument 1                     Location  : Vial 63
Injection Date  : 9/2/2014 2:28:14 AM             Inj       :    1
                                                    Inj Volume: 5 µl
Acq. Method     : C:\CHEM32\1\DATA\ERHAD\ZY 2014-09-02 01-08-37\05-30ETOH.M
Last changed    : 9/2/2014 1:44:14 AM by RZ
                  (modified after loading)
Analysis Method : C:\CHEM32\1\METHODS\YMWHEXANES_PT8.M
Last changed    : 9/2/2014 2:25:27 AM by RZ
                  (modified after loading)
```

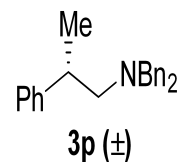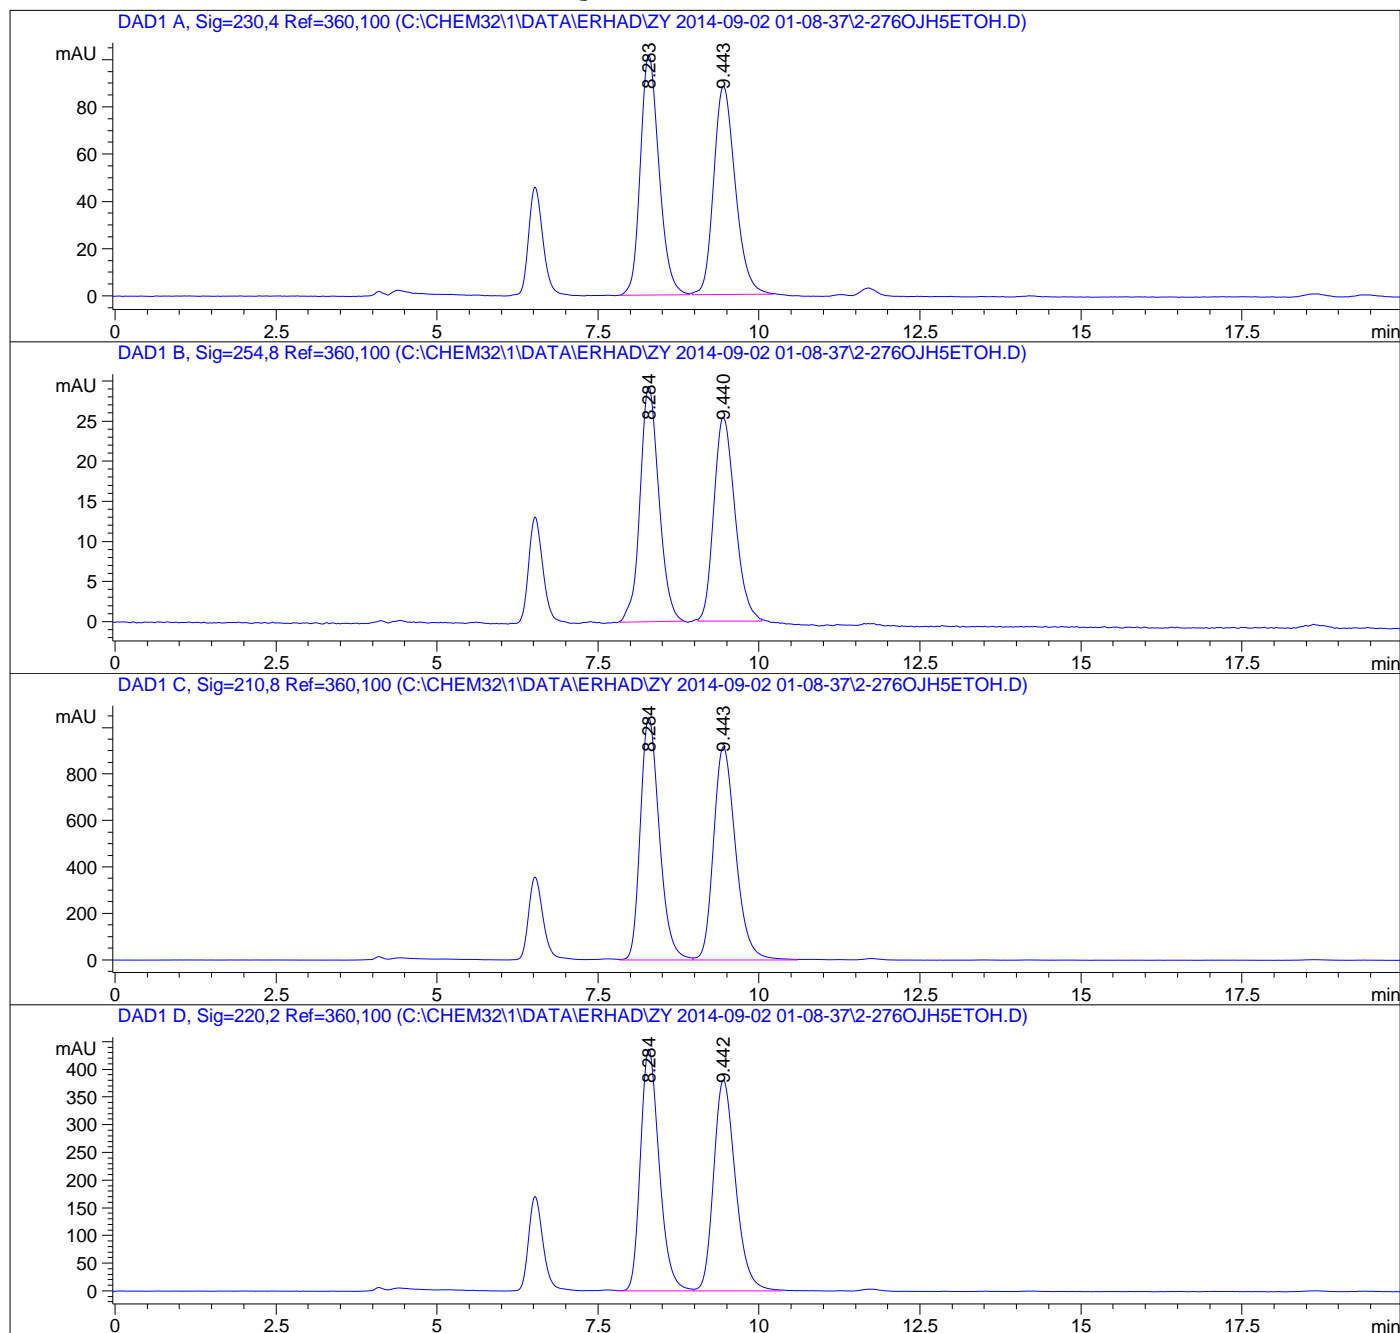

Data File C:\CHEM32\1\DATA\ERHAD\ZY 2014-09-02 01-08-37\2-2760JH5ETOH.D  
 Sample Name: 2-276RAC

=====  
 Area Percent Report  
 =====

Sorted By : Signal  
 Multiplier: : 1.0000  
 Dilution: : 1.0000  
 Use Multiplier & Dilution Factor with ISTDs

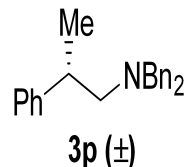

Signal 1: DAD1 A, Sig=230,4 Ref=360,100

| Peak # | RetTime [min] | Type | Width [min] | Area [mAU*s] | Height [mAU] | Area %  |
|--------|---------------|------|-------------|--------------|--------------|---------|
| 1      | 8.283         | BB   | 0.3092      | 2050.70020   | 101.73317    | 49.8138 |
| 2      | 9.443         | BB   | 0.3609      | 2066.03271   | 88.31048     | 50.1862 |

Totals : 4116.73291 190.04365

Signal 2: DAD1 B, Sig=254,8 Ref=360,100

| Peak # | RetTime [min] | Type | Width [min] | Area [mAU*s] | Height [mAU] | Area %  |
|--------|---------------|------|-------------|--------------|--------------|---------|
| 1      | 8.284         | BB   | 0.3096      | 598.58087    | 29.39123     | 50.7496 |
| 2      | 9.440         | BB   | 0.3427      | 580.89856    | 25.40989     | 49.2504 |

Totals : 1179.47943 54.80111

Signal 3: DAD1 C, Sig=210,8 Ref=360,100

| Peak # | RetTime [min] | Type | Width [min] | Area [mAU*s] | Height [mAU] | Area %  |
|--------|---------------|------|-------------|--------------|--------------|---------|
| 1      | 8.284         | VV   | 0.3133      | 2.14026e4    | 1043.41650   | 49.3862 |
| 2      | 9.443         | VB   | 0.3707      | 2.19345e4    | 918.33545    | 50.6138 |

Totals : 4.33371e4 1961.75195

Signal 4: DAD1 D, Sig=220,2 Ref=360,100

| Peak # | RetTime [min] | Type | Width [min] | Area [mAU*s] | Height [mAU] | Area %  |
|--------|---------------|------|-------------|--------------|--------------|---------|
| 1      | 8.284         | VV   | 0.3126      | 8862.82617   | 436.94299    | 49.5261 |
| 2      | 9.442         | VB   | 0.3681      | 9032.43457   | 381.73410    | 50.4739 |

Data File C:\CHEM32\1\DATA\ERHAD\ZY 2014-09-02 01-08-37\4-229BOJH5ETOH.D

Sample Name: 4-229B

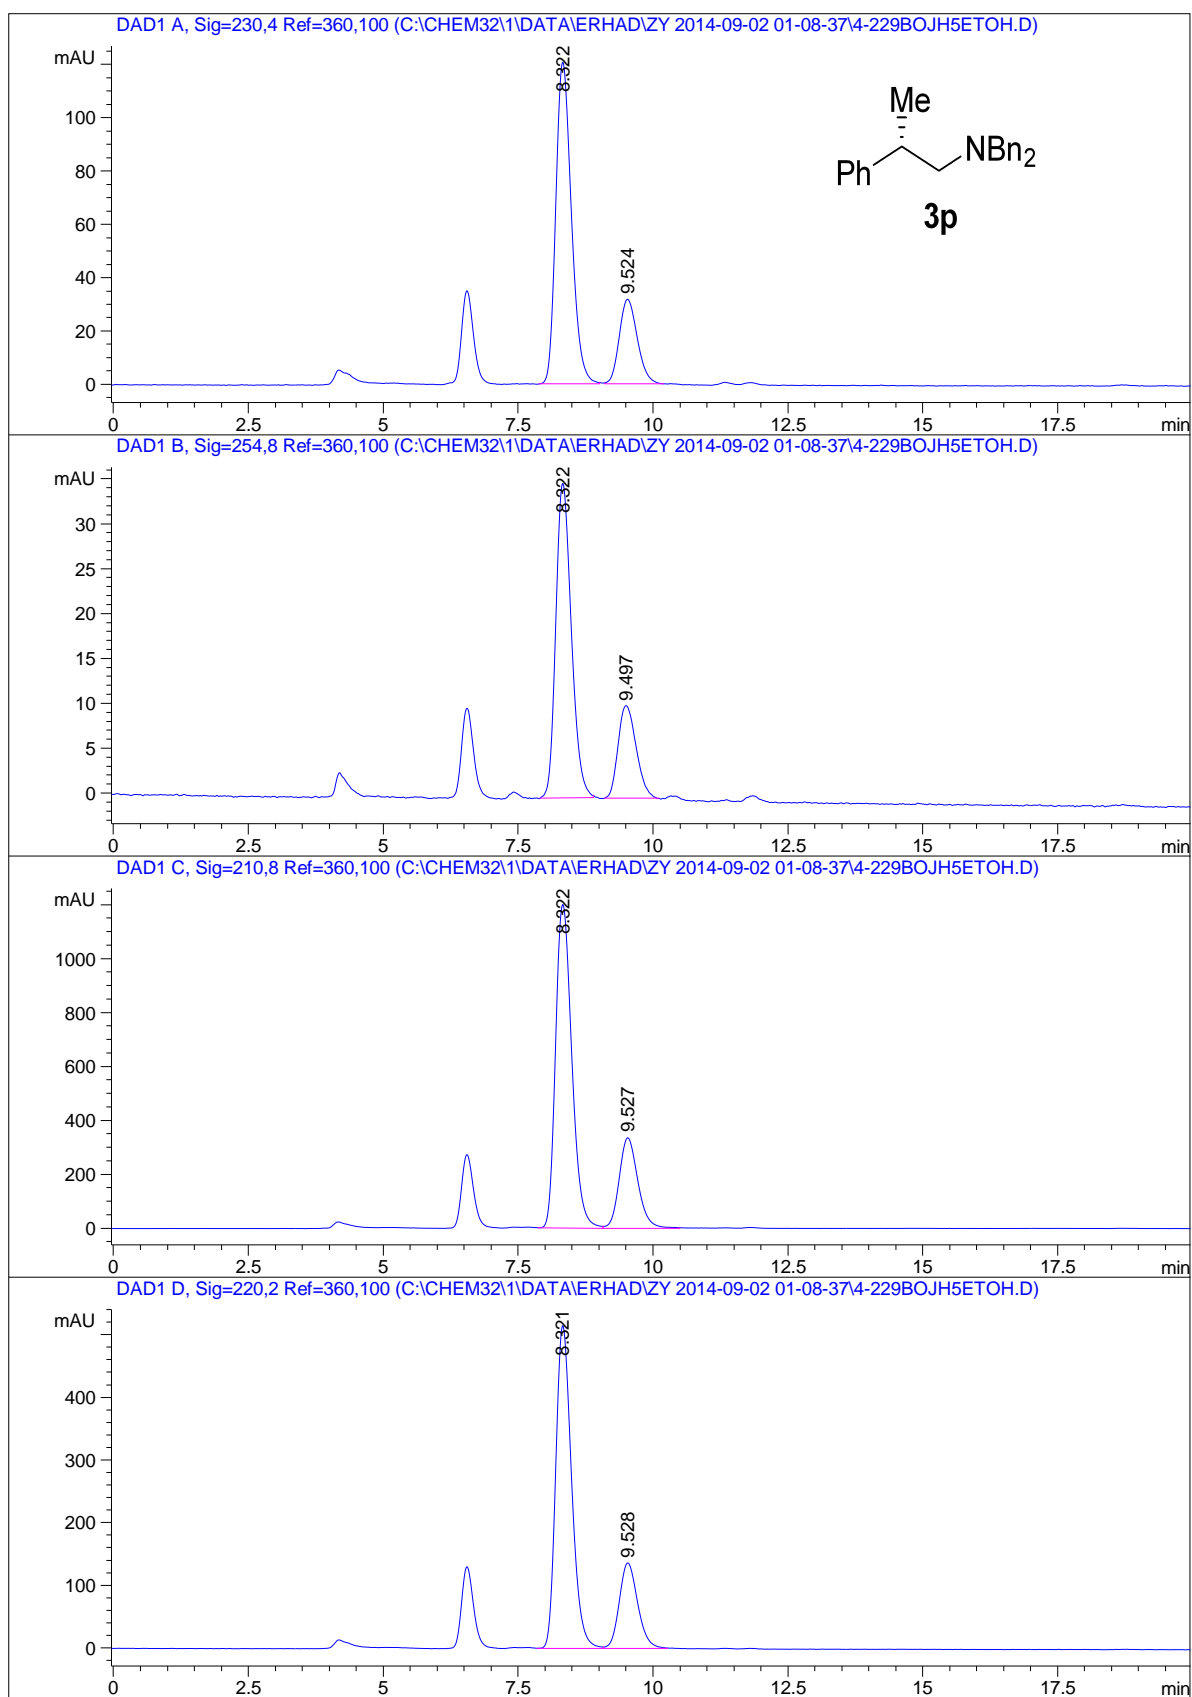

Data File C:\CHEM32\1\DATA\ERHAD\ZY 2014-09-02 01-08-37\4-229BOJH5ETOH.D  
 Sample Name: 4-229B

=====  
 Area Percent Report  
 =====

Sorted By : Signal  
 Multiplier: : 1.0000  
 Dilution: : 1.0000  
 Use Multiplier & Dilution Factor with ISTDs

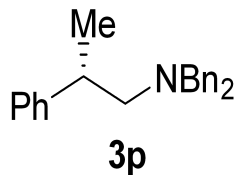

Signal 1: DAD1 A, Sig=230,4 Ref=360,100

| Peak # | RetTime [min] | Type | Width [min] | Area [mAU*s] | Height [mAU] | Area %  |
|--------|---------------|------|-------------|--------------|--------------|---------|
| 1      | 8.322         | BB   | 0.3105      | 2426.24023   | 120.71318    | 76.6466 |
| 2      | 9.524         | BB   | 0.3436      | 739.24847    | 31.75132     | 23.3534 |

Totals : 3165.48871 152.46450

Signal 2: DAD1 B, Sig=254,8 Ref=360,100

| Peak # | RetTime [min] | Type | Width [min] | Area [mAU*s] | Height [mAU] | Area %  |
|--------|---------------|------|-------------|--------------|--------------|---------|
| 1      | 8.322         | BB   | 0.3059      | 702.76685    | 35.05664     | 74.3959 |
| 2      | 9.497         | BB   | 0.3292      | 241.86440    | 10.32767     | 25.6041 |

Totals : 944.63124 45.38431

Signal 3: DAD1 C, Sig=210,8 Ref=360,100

| Peak # | RetTime [min] | Type | Width [min] | Area [mAU*s] | Height [mAU] | Area %  |
|--------|---------------|------|-------------|--------------|--------------|---------|
| 1      | 8.322         | VV   | 0.3260      | 2.51112e4    | 1200.84143   | 75.5380 |
| 2      | 9.527         | VV   | 0.3744      | 8131.95898   | 335.95572    | 24.4620 |

Totals : 3.32432e4 1536.79715

Signal 4: DAD1 D, Sig=220,2 Ref=360,100

| Peak # | RetTime [min] | Type | Width [min] | Area [mAU*s] | Height [mAU] | Area %  |
|--------|---------------|------|-------------|--------------|--------------|---------|
| 1      | 8.321         | VV   | 0.3177      | 1.05069e4    | 515.77515    | 76.2628 |
| 2      | 9.528         | VB   | 0.3666      | 3270.32446   | 136.96390    | 23.7372 |



Data File C:\CHEM32\1\DATA\ZHU\NAOYUKI\_LC 2014-06-09 22-41-39\2-148-20J20.D  
 Sample Name: 2-148-2RAC

=====  
 Area Percent Report  
 =====

Sorted By : Signal  
 Multiplier: : 1.0000  
 Dilution: : 1.0000  
 Use Multiplier & Dilution Factor with ISTDs

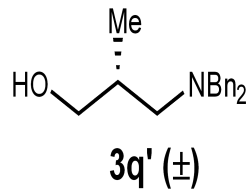

Signal 1: DAD1 A, Sig=230,4 Ref=360,100

| Peak # | RetTime [min] | Type | Width [min] | Area [mAU*s] | Height [mAU] | Area %  |
|--------|---------------|------|-------------|--------------|--------------|---------|
| 1      | 9.391         | BV   | 0.5263      | 911.01184    | 25.78124     | 50.7784 |
| 2      | 10.913        | VB   | 0.5125      | 883.08154    | 20.83526     | 49.2216 |

Totals : 1794.09338 46.61650

Signal 2: DAD1 B, Sig=254,16 Ref=360,100

| Peak # | RetTime [min] | Type | Width [min] | Area [mAU*s] | Height [mAU] | Area %  |
|--------|---------------|------|-------------|--------------|--------------|---------|
| 1      | 9.388         | BB   | 0.4689      | 279.44220    | 8.13238      | 50.8033 |
| 2      | 10.916        | BB   | 0.5211      | 270.60504    | 6.61695      | 49.1967 |

Totals : 550.04724 14.74933

Signal 3: DAD1 C, Sig=210,8 Ref=360,100

| Peak # | RetTime [min] | Type | Width [min] | Area [mAU*s] | Height [mAU] | Area %  |
|--------|---------------|------|-------------|--------------|--------------|---------|
| 1      | 9.387         | VV   | 0.5390      | 1.14803e4    | 329.09653    | 49.3576 |
| 2      | 10.918        | VB   | 0.6498      | 1.17792e4    | 270.60461    | 50.6424 |

Totals : 2.32595e4 599.70114

Signal 4: DAD1 D, Sig=220,2 Ref=360,100

| Peak # | RetTime [min] | Type | Width [min] | Area [mAU*s] | Height [mAU] | Area %  |
|--------|---------------|------|-------------|--------------|--------------|---------|
| 1      | 9.383         | BV   | 0.5418      | 4605.99854   | 132.43756    | 49.6905 |
| 2      | 10.920        | VB   | 0.6321      | 4663.37451   | 108.34921    | 50.3095 |



Data File C:\CHEM32\1\DATA\ZHU\NAOYUKI\_LC 2014-06-09 22-41-39\4-116-2OJ20.D

Sample Name: 4-116-2

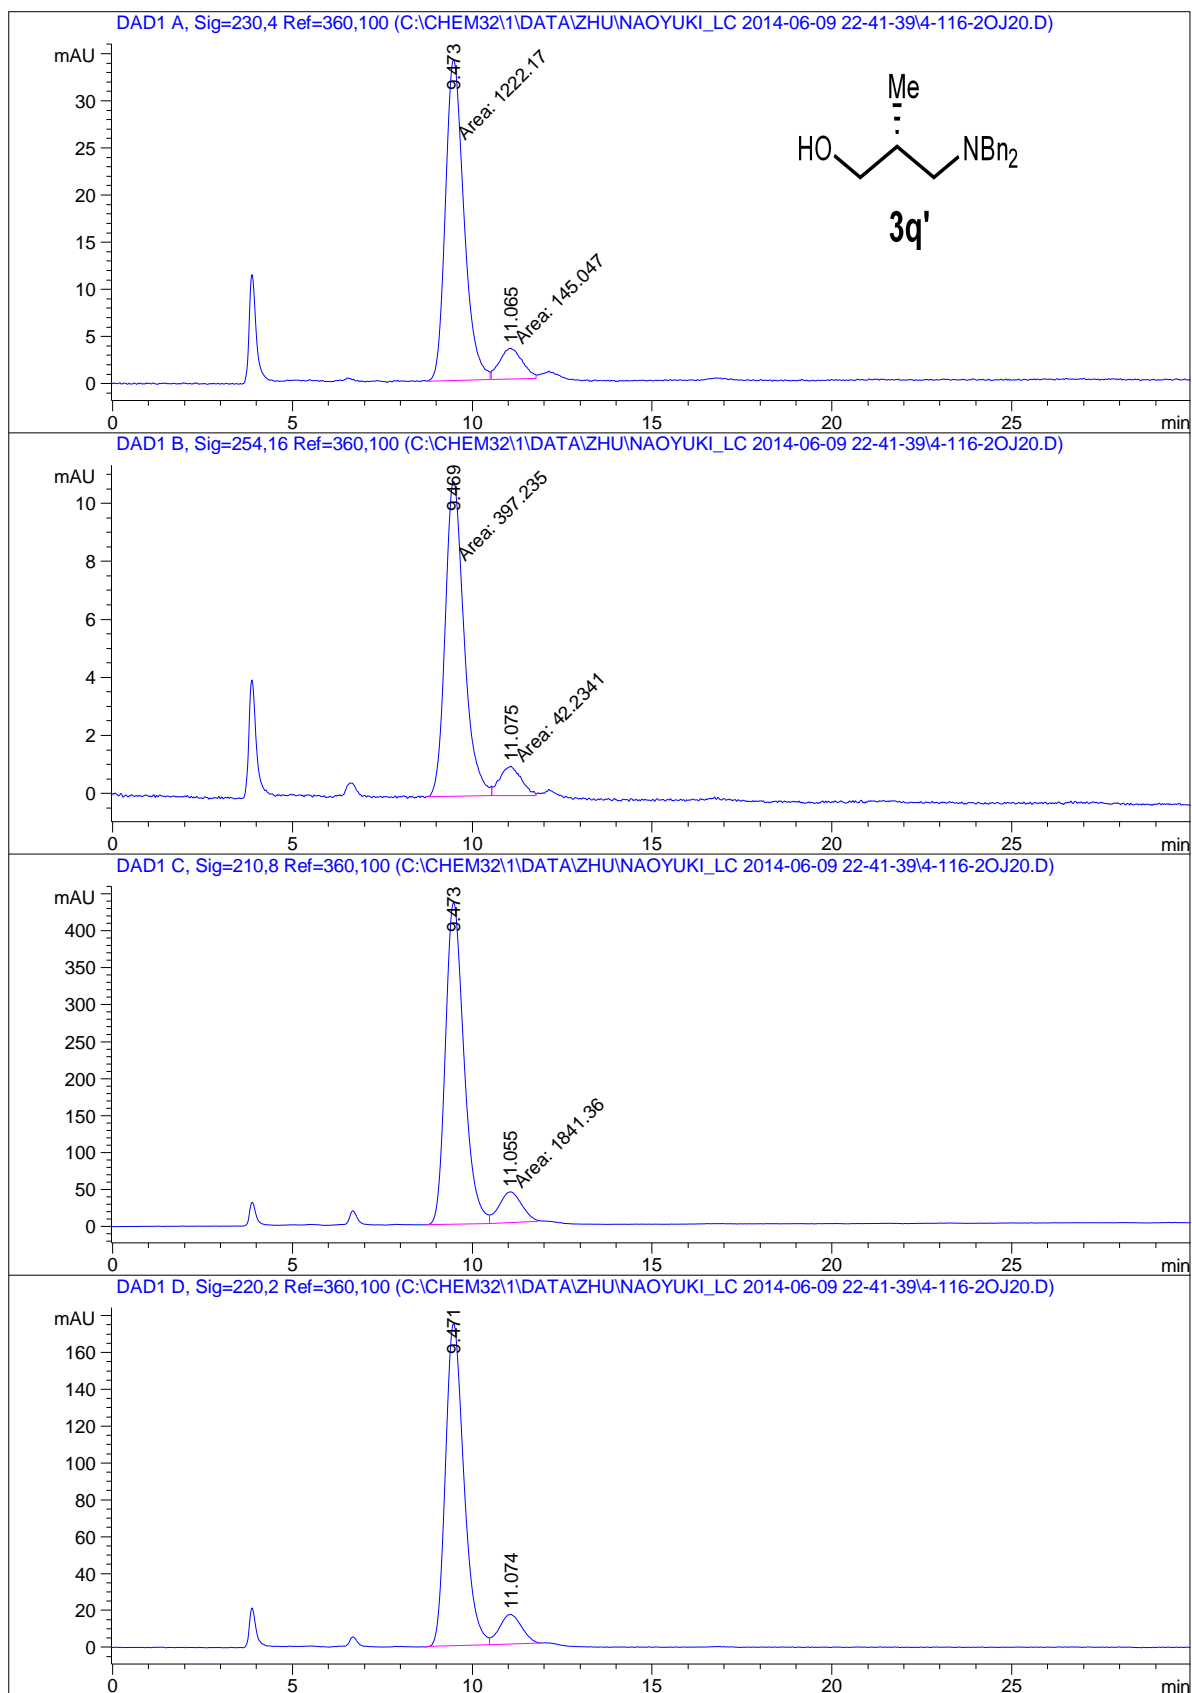

Data File C:\CHEM32\1\DATA\ZHU\NAOYUKI\_LC 2014-06-09 22-41-39\4-116-2OJ20.D  
 Sample Name: 4-116-2

=====  
 Area Percent Report  
 =====

Sorted By : Signal  
 Multiplier: : 1.0000  
 Dilution: : 1.0000  
 Use Multiplier & Dilution Factor with ISTDs

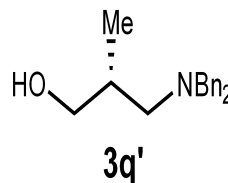

Signal 1: DAD1 A, Sig=230,4 Ref=360,100

| Peak # | RetTime [min] | Type | Width [min] | Area [mAU*s] | Height [mAU] | Area %  |
|--------|---------------|------|-------------|--------------|--------------|---------|
| 1      | 9.473         | MF   | 0.5992      | 1222.16711   | 33.99543     | 89.3911 |
| 2      | 11.065        | FM   | 0.7346      | 145.04677    | 3.29081      | 10.6089 |

Totals : 1367.21388 37.28624

Signal 2: DAD1 B, Sig=254,16 Ref=360,100

| Peak # | RetTime [min] | Type | Width [min] | Area [mAU*s] | Height [mAU] | Area %  |
|--------|---------------|------|-------------|--------------|--------------|---------|
| 1      | 9.469         | MF   | 0.6096      | 397.23544    | 10.86067     | 90.3897 |
| 2      | 11.075        | FM   | 0.6908      | 42.23415     | 1.01903      | 9.6103  |

Totals : 439.46959 11.87971

Signal 3: DAD1 C, Sig=210,8 Ref=360,100

| Peak # | RetTime [min] | Type | Width [min] | Area [mAU*s] | Height [mAU] | Area %  |
|--------|---------------|------|-------------|--------------|--------------|---------|
| 1      | 9.473         | BB   | 0.5400      | 1.56619e4    | 435.09448    | 89.4799 |
| 2      | 11.055        | MM   | 0.7332      | 1841.35583   | 41.85434     | 10.5201 |

Totals : 1.75032e4 476.94883

Signal 4: DAD1 D, Sig=220,2 Ref=360,100

| Peak # | RetTime [min] | Type | Width [min] | Area [mAU*s] | Height [mAU] | Area %  |
|--------|---------------|------|-------------|--------------|--------------|---------|
| 1      | 9.471         | BB   | 0.5424      | 6246.09863   | 174.99199    | 89.9031 |
| 2      | 11.074        | BV   | 0.5187      | 701.49048    | 16.15097     | 10.0969 |

Data File C:\CHEM32\1\DATA\ZHU\ZY 2014-09-22 01-52-29\2-148-20J20.D

Sample Name: 2-148-2RAC

=====

|                                                                   |                               |
|-------------------------------------------------------------------|-------------------------------|
| Acq. Operator : EA                                                | Seq. Line : 3                 |
| Acq. Instrument : Instrument 1                                    | Location : Vial 62            |
| Injection Date : 9/22/2014 2:44:00 AM                             | Inj : 1                       |
|                                                                   | Inj Volume : 5 $\mu$ l        |
| Different Inj Volume from Sequence !                              | Actual Inj Volume : 3 $\mu$ l |
| Acq. Method : C:\CHEM32\1\DATA\ZHU\ZY 2014-09-22 01-52-29\20-30.M |                               |
| Last changed : 9/22/2014 2:58:17 AM by EA                         |                               |
|                                                                   | (modified after loading)      |
| Analysis Method : C:\CHEM32\1\METHODS\YMWHEXANES_PT8.M            |                               |
| Last changed : 9/22/2014 2:56:39 AM by RZ                         |                               |
|                                                                   | (modified after loading)      |

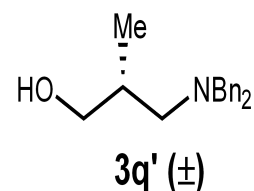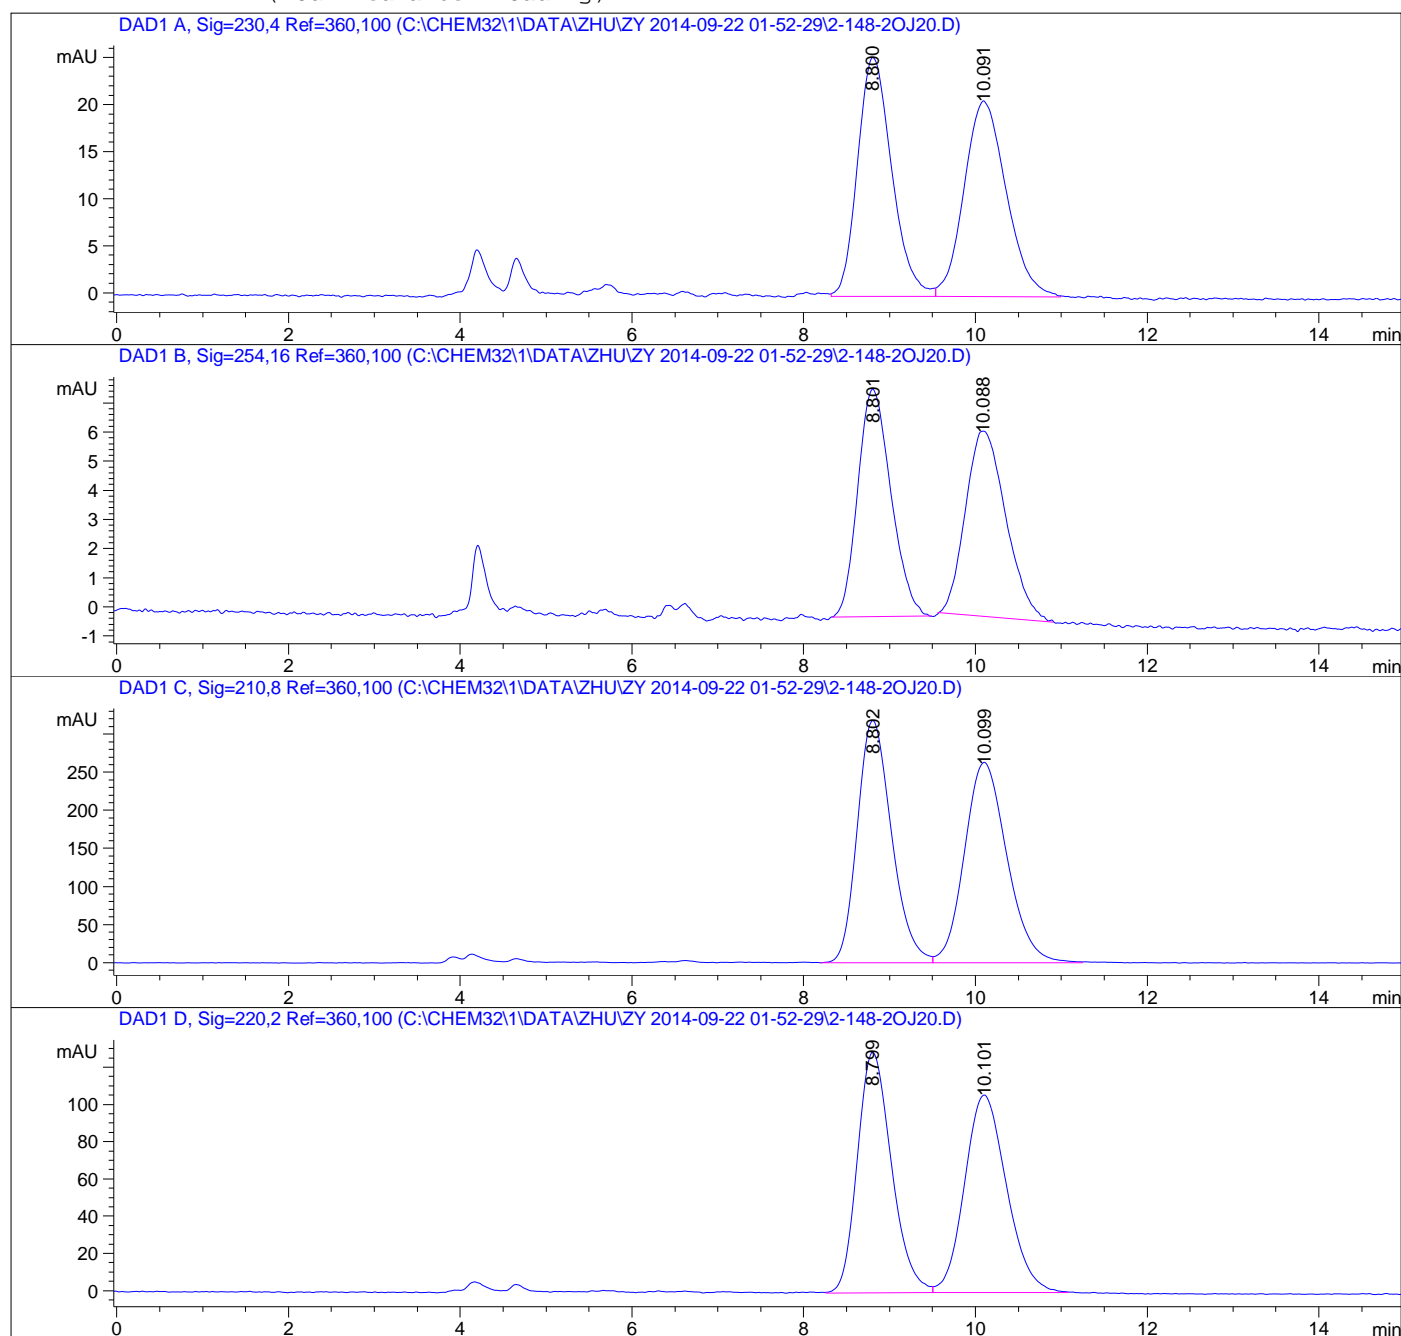

Data File C:\CHEM32\1\DATA\ZHU\ZY 2014-09-22 01-52-29\2-148-20J20.D

Sample Name: 2-148-2RAC

 =====  
 Area Percent Report  
 =====

Sorted By : Signal  
 Multiplier: : 1.0000  
 Dilution: : 1.0000  
 Use Multiplier & Dilution Factor with ISTDs

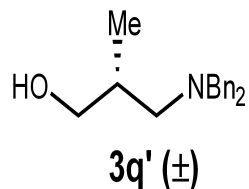

Signal 1: DAD1 A, Sig=230,4 Ref=360,100

| Peak # | RetTime [min] | Type | Width [min] | Area [mAU*s] | Height [mAU] | Area %  |
|--------|---------------|------|-------------|--------------|--------------|---------|
| 1      | 8.800         | BB   | 0.4103      | 706.63995    | 25.42277     | 49.8398 |
| 2      | 10.091        | BB   | 0.4342      | 711.18304    | 20.83916     | 50.1602 |

Totals : 1417.82300 46.26193

Signal 2: DAD1 B, Sig=254,16 Ref=360,100

| Peak # | RetTime [min] | Type | Width [min] | Area [mAU*s] | Height [mAU] | Area %  |
|--------|---------------|------|-------------|--------------|--------------|---------|
| 1      | 8.801         | BB   | 0.3836      | 210.28117    | 7.82374      | 50.1999 |
| 2      | 10.088        | BB   | 0.4045      | 208.60609    | 6.36255      | 49.8001 |

Totals : 418.88727 14.18629

Signal 3: DAD1 C, Sig=210,8 Ref=360,100

| Peak # | RetTime [min] | Type | Width [min] | Area [mAU*s] | Height [mAU] | Area %  |
|--------|---------------|------|-------------|--------------|--------------|---------|
| 1      | 8.802         | VV   | 0.4246      | 8863.16309   | 318.55432    | 49.3835 |
| 2      | 10.099        | VB   | 0.5119      | 9084.46191   | 263.71555    | 50.6165 |

Totals : 1.79476e4 582.26987

Signal 4: DAD1 D, Sig=220,2 Ref=360,100

| Peak # | RetTime [min] | Type | Width [min] | Area [mAU*s] | Height [mAU] | Area %  |
|--------|---------------|------|-------------|--------------|--------------|---------|
| 1      | 8.799         | BV   | 0.4242      | 3575.70679   | 129.45467    | 49.7257 |
| 2      | 10.101        | VB   | 0.4930      | 3615.16260   | 106.23516    | 50.2743 |

Data File C:\CHEM32\1\DATA\ZHU\ZY 2014-09-22 01-52-29\4-116-2RECR.D

Sample Name: 4-116-2RECR

=====

|                                                                   |                          |
|-------------------------------------------------------------------|--------------------------|
| Acq. Operator : EA                                                | Seq. Line : 2            |
| Acq. Instrument : Instrument 1                                    | Location : Vial 61       |
| Injection Date : 9/22/2014 2:22:01 AM                             | Inj : 1                  |
|                                                                   | Inj Volume : 5 µl        |
| Different Inj Volume from Sequence !                              | Actual Inj Volume : 3 µl |
| Acq. Method : C:\CHEM32\1\DATA\ZHU\ZY 2014-09-22 01-52-29\20-30.M |                          |
| Last changed : 9/22/2014 2:38:32 AM by EA                         | (modified after loading) |
| Analysis Method : C:\CHEM32\1\METHODS\YMWHEXANES_PT8.M            |                          |
| Last changed : 9/22/2014 2:56:39 AM by RZ                         | (modified after loading) |

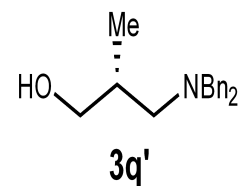

After recrystallization of 3q  
from ethyl ether/MeOH

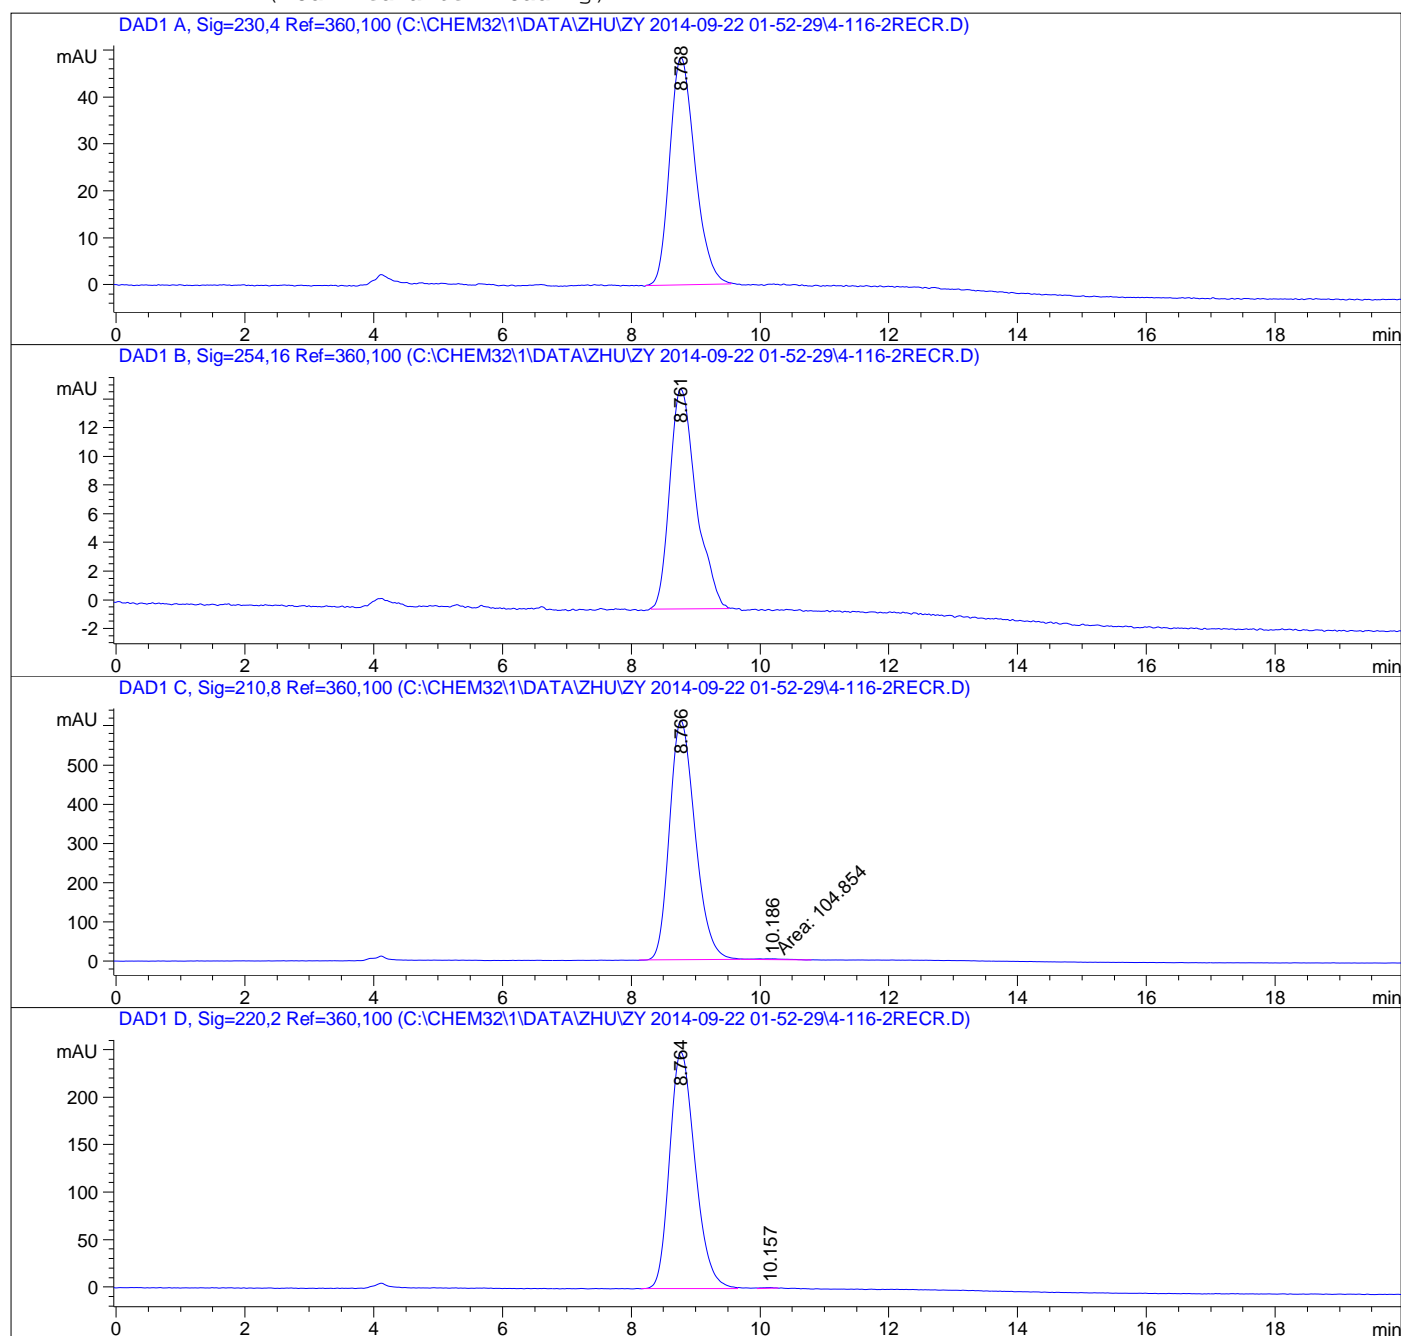

Data File C:\CHEM32\1\DATA\ZHU\ZY 2014-09-22 01-52-29\4-116-2RECR.D

Sample Name: 4-116-2RECR

```

=====
                          Area Percent Report
=====

```

```

Sorted By      :      Signal
Multiplier:    :      1.0000
Dilution:      :      1.0000
Use Multiplier & Dilution Factor with ISTDs

```

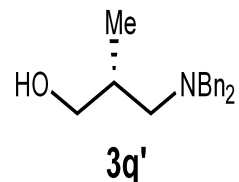

After recrystallization of 3q  
from ethyl ether/MeOH

Signal 1: DAD1 A, Sig=230,4 Ref=360,100

| Peak # | RetTime [min] | Type | Width [min] | Area [mAU*s] | Height [mAU] | Area %   |
|--------|---------------|------|-------------|--------------|--------------|----------|
| 1      | 8.768         | BB   | 0.4217      | 1329.85376   | 48.53413     | 100.0000 |

Totals : 1329.85376 48.53413

Signal 2: DAD1 B, Sig=254,16 Ref=360,100

| Peak # | RetTime [min] | Type | Width [min] | Area [mAU*s] | Height [mAU] | Area %   |
|--------|---------------|------|-------------|--------------|--------------|----------|
| 1      | 8.761         | BB   | 0.4157      | 436.00656    | 15.33435     | 100.0000 |

Totals : 436.00656 15.33435

Signal 3: DAD1 C, Sig=210,8 Ref=360,100

| Peak # | RetTime [min] | Type | Width [min] | Area [mAU*s] | Height [mAU] | Area %  |
|--------|---------------|------|-------------|--------------|--------------|---------|
| 1      | 8.766         | BV   | 0.4240      | 1.68491e4    | 610.45148    | 99.3815 |
| 2      | 10.186        | MF   | 0.6760      | 104.85434    | 2.58507      | 0.6185  |

Totals : 1.69539e4 613.03655

Signal 4: DAD1 D, Sig=220,2 Ref=360,100

| Peak # | RetTime [min] | Type | Width [min] | Area [mAU*s] | Height [mAU] | Area %  |
|--------|---------------|------|-------------|--------------|--------------|---------|
| 1      | 8.764         | VB   | 0.4287      | 6857.89502   | 249.45605    | 99.7759 |
| 2      | 10.157        | VV   | 0.1736      | 15.40195     | 1.07222      | 0.2241  |

Totals : 6873.29697 250.52827

Data File C:\CHEM32\1\DATA\ZHU\NAOYUKI\_LC 2014-07-15 03-00-58\4-130-2OJ10.D

Sample Name: 4-130-2

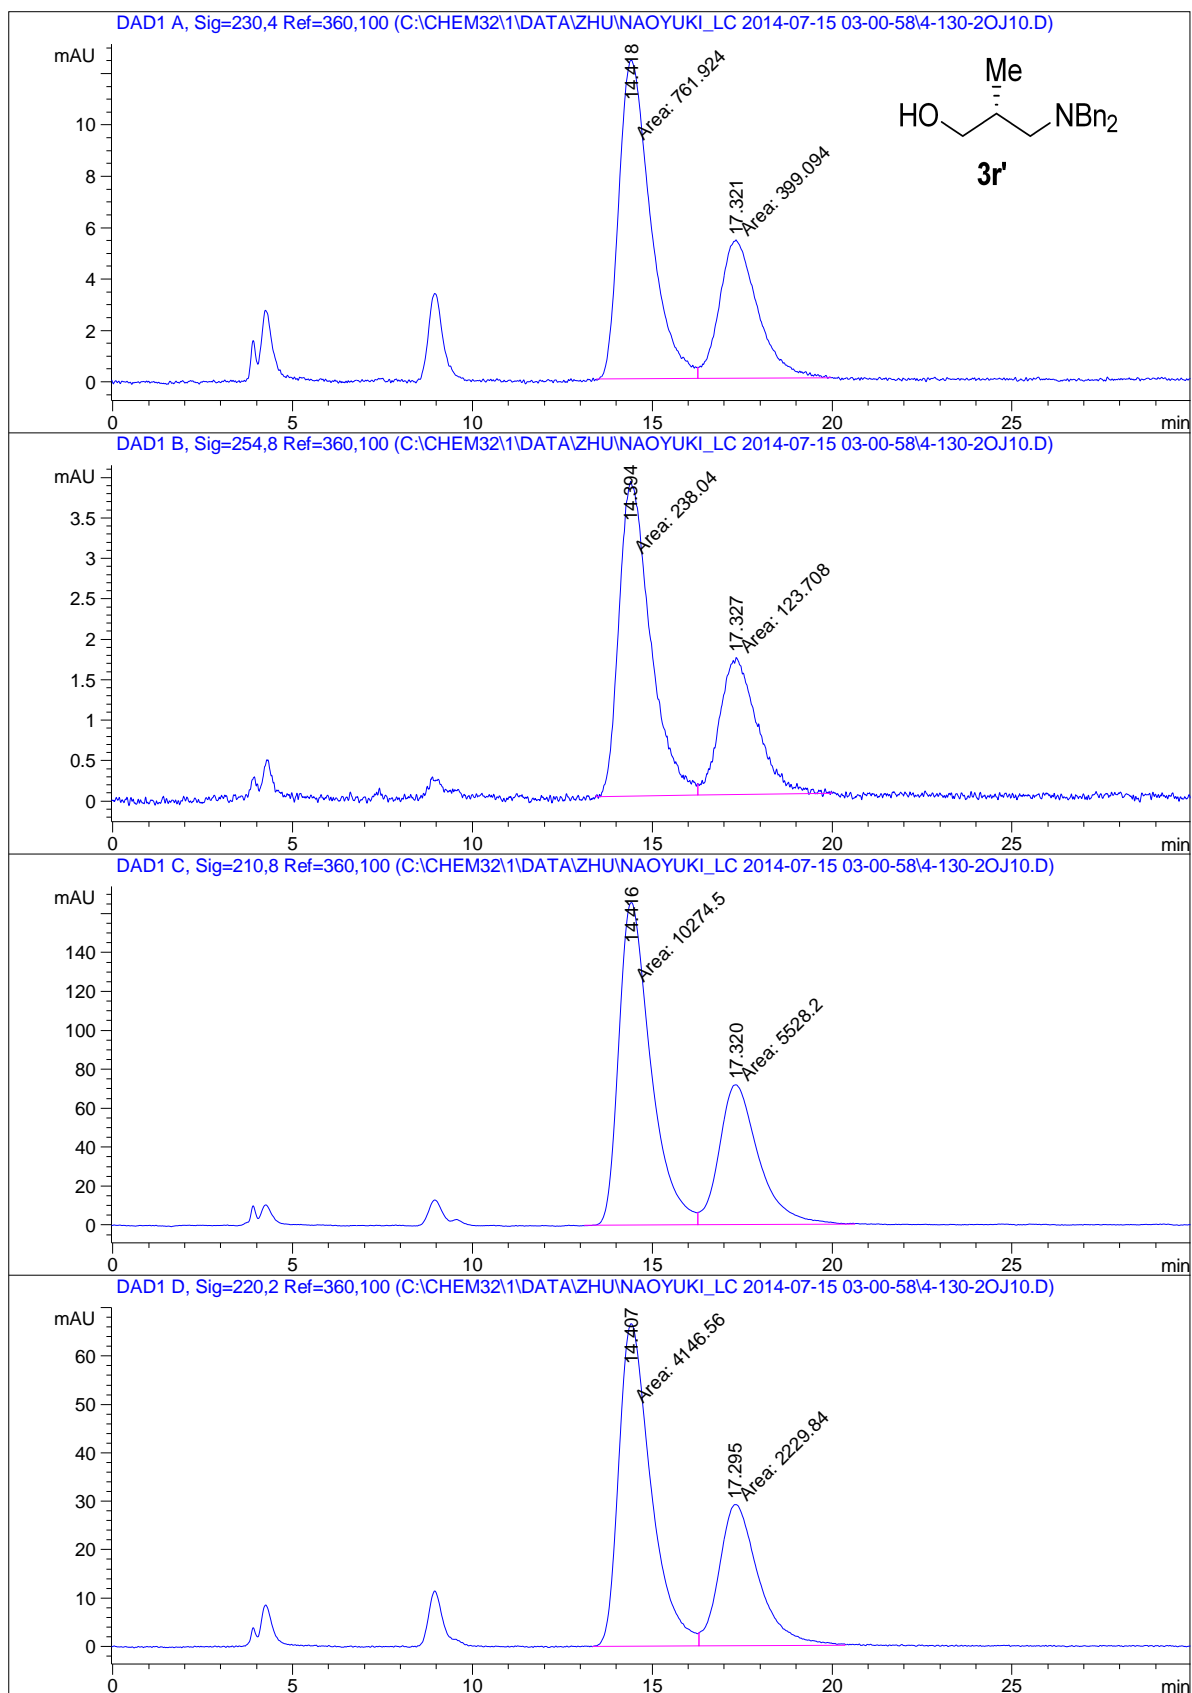

Data File C:\CHEM32\1\DATA\ZHU\NAOYUKI\_LC 2014-07-15 03-00-58\4-130-2OJ10.D  
 Sample Name: 4-130-2

=====  
 Area Percent Report  
 =====

Sorted By : Signal  
 Multiplier: : 1.0000  
 Dilution: : 1.0000  
 Use Multiplier & Dilution Factor with ISTDs

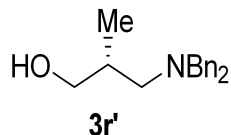

Signal 1: DAD1 A, Sig=230,4 Ref=360,100

| Peak # | RetTime [min] | Type | Width [min] | Area [mAU*s] | Height [mAU] | Area %  |
|--------|---------------|------|-------------|--------------|--------------|---------|
| 1      | 14.418        | MF   | 1.0238      | 761.92371    | 12.40298     | 65.6255 |
| 2      | 17.321        | FM   | 1.2336      | 399.09357    | 5.39188      | 34.3745 |

Totals : 1161.01727 17.79486

Signal 2: DAD1 B, Sig=254,8 Ref=360,100

| Peak # | RetTime [min] | Type | Width [min] | Area [mAU*s] | Height [mAU] | Area %  |
|--------|---------------|------|-------------|--------------|--------------|---------|
| 1      | 14.394        | MF   | 1.0189      | 238.03987    | 3.89360      | 65.8026 |
| 2      | 17.327        | FM   | 1.2151      | 123.70847    | 1.69683      | 34.1974 |

Totals : 361.74834 5.59043

Signal 3: DAD1 C, Sig=210,8 Ref=360,100

| Peak # | RetTime [min] | Type | Width [min] | Area [mAU*s] | Height [mAU] | Area %  |
|--------|---------------|------|-------------|--------------|--------------|---------|
| 1      | 14.416        | MF   | 1.0321      | 1.02745e4    | 165.91457    | 65.0174 |
| 2      | 17.320        | MF   | 1.2785      | 5528.19531   | 72.06385     | 34.9826 |

Totals : 1.58027e4 237.97842

Signal 4: DAD1 D, Sig=220,2 Ref=360,100

| Peak # | RetTime [min] | Type | Width [min] | Area [mAU*s] | Height [mAU] | Area %  |
|--------|---------------|------|-------------|--------------|--------------|---------|
| 1      | 14.407        | MF   | 1.0370      | 4146.56006   | 66.64312     | 65.0298 |
| 2      | 17.295        | MF   | 1.2731      | 2229.84106   | 29.19160     | 34.9702 |



Data File C:\CHEM32\1\DATA\ZHU\NAOYUKI\_LC 2014-07-15 00-19-21\4-129-2OJ10.D

Sample Name: 4-129-2

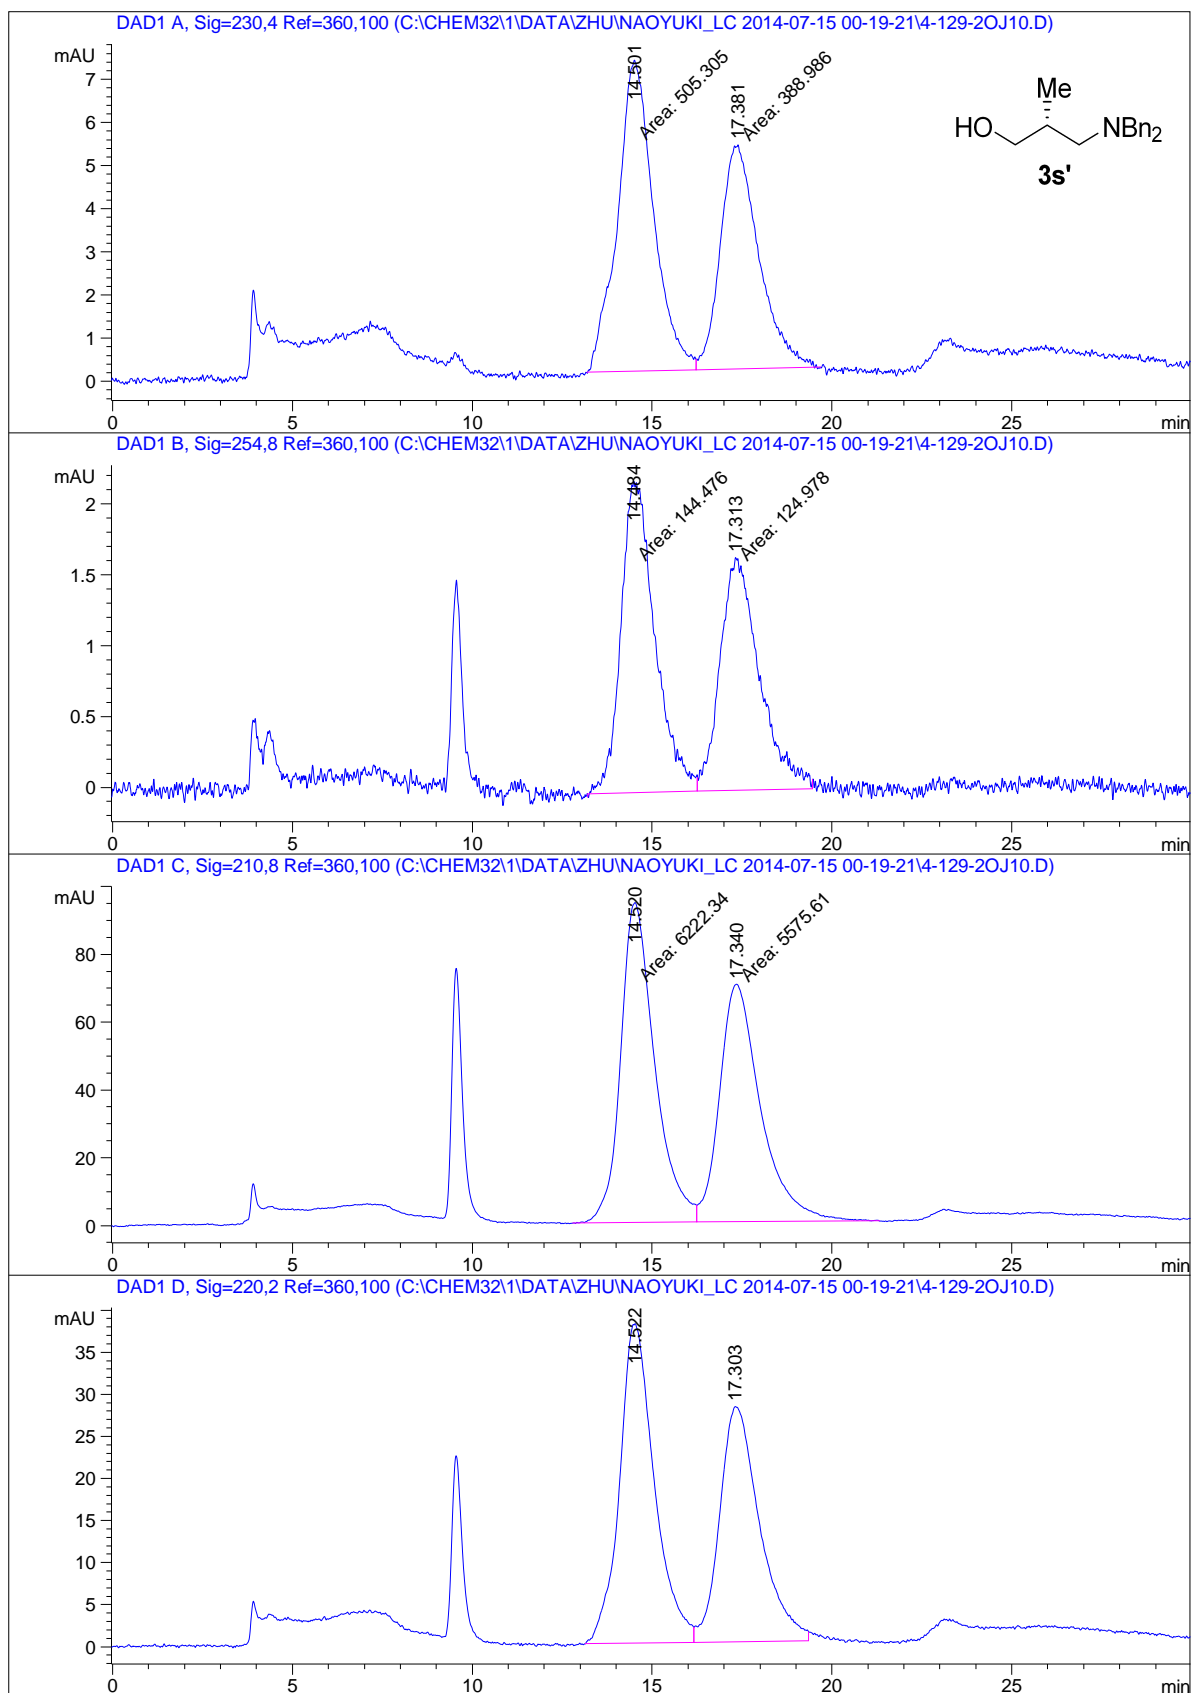

Data File C:\CHEM32\1\DATA\ZHU\NAOYUKI\_LC 2014-07-15 00-19-21\4-129-2OJ10.D  
 Sample Name: 4-129-2

=====  
 Area Percent Report  
 =====

Sorted By : Signal  
 Multiplier: : 1.0000  
 Dilution: : 1.0000  
 Use Multiplier & Dilution Factor with ISTDs

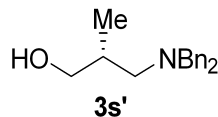

Signal 1: DAD1 A, Sig=230,4 Ref=360,100

| Peak # | RetTime [min] | Type | Width [min] | Area [mAU*s] | Height [mAU] | Area %  |
|--------|---------------|------|-------------|--------------|--------------|---------|
| 1      | 14.501        | MF   | 1.1668      | 505.30511    | 7.21752      | 56.5034 |
| 2      | 17.381        | FM   | 1.2459      | 388.98611    | 5.20344      | 43.4966 |

Totals : 894.29123 12.42096

Signal 2: DAD1 B, Sig=254,8 Ref=360,100

| Peak # | RetTime [min] | Type | Width [min] | Area [mAU*s] | Height [mAU] | Area %  |
|--------|---------------|------|-------------|--------------|--------------|---------|
| 1      | 14.484        | MF   | 1.0948      | 144.47568    | 2.19948      | 53.6179 |
| 2      | 17.313        | FM   | 1.2666      | 124.97831    | 1.64456      | 46.3821 |

Totals : 269.45399 3.84404

Signal 3: DAD1 C, Sig=210,8 Ref=360,100

| Peak # | RetTime [min] | Type | Width [min] | Area [mAU*s] | Height [mAU] | Area %  |
|--------|---------------|------|-------------|--------------|--------------|---------|
| 1      | 14.520        | MF   | 1.0981      | 6222.34424   | 94.44027     | 52.7409 |
| 2      | 17.340        | FM   | 1.3249      | 5575.60547   | 70.13608     | 47.2591 |

Totals : 1.17979e4 164.57635

Signal 4: DAD1 D, Sig=220,2 Ref=360,100

| Peak # | RetTime [min] | Type | Width [min] | Area [mAU*s] | Height [mAU] | Area %  |
|--------|---------------|------|-------------|--------------|--------------|---------|
| 1      | 14.522        | BV   | 0.8008      | 2561.60303   | 37.98285     | 54.1993 |
| 2      | 17.303        | VB   | 0.9087      | 2164.66602   | 27.97696     | 45.8007 |

Data File C:\CHEM32\1\DATA\ZHU\NAOYUKI\_LC 2014-06-19 00-20-20\4-138OT2.D

Sample Name: 4-138RAC

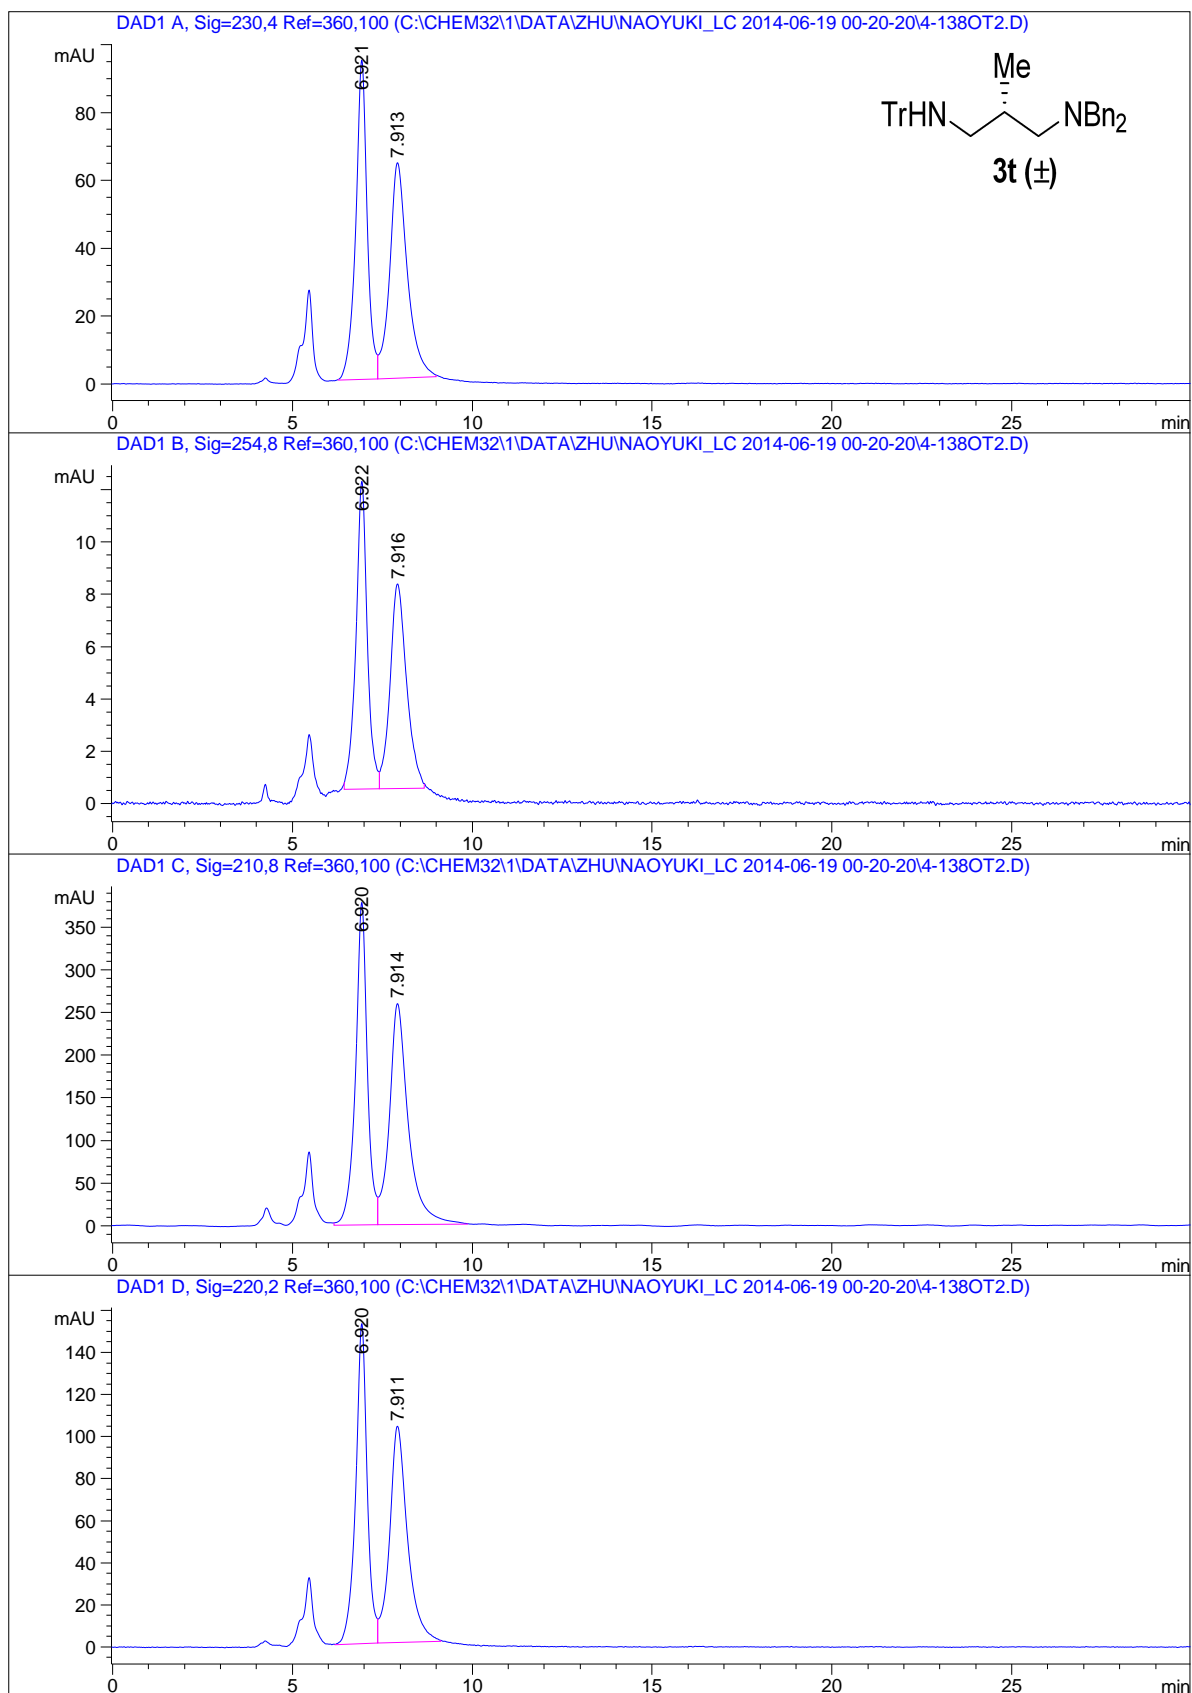

Data File C:\CHEM32\1\DATA\ZHU\NAOYUKI\_LC 2014-06-19 00-20-20\4-138OT2.D  
 Sample Name: 4-138RAC

=====  
 Area Percent Report  
 =====

Sorted By : Signal  
 Multiplier: : 1.0000  
 Dilution: : 1.0000  
 Use Multiplier & Dilution Factor with ISTDs

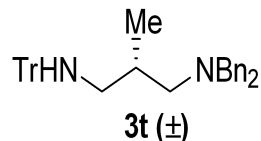

Signal 1: DAD1 A, Sig=230,4 Ref=360,100

| Peak # | RetTime [min] | Type | Width [min] | Area [mAU*s] | Height [mAU] | Area %  |
|--------|---------------|------|-------------|--------------|--------------|---------|
| 1      | 6.921         | BV   | 0.3239      | 2097.18701   | 94.14021     | 49.0088 |
| 2      | 7.913         | VB   | 0.4847      | 2182.01514   | 63.53862     | 50.9912 |

Totals : 4279.20215 157.67883

Signal 2: DAD1 B, Sig=254,8 Ref=360,100

| Peak # | RetTime [min] | Type | Width [min] | Area [mAU*s] | Height [mAU] | Area %  |
|--------|---------------|------|-------------|--------------|--------------|---------|
| 1      | 6.922         | BV   | 0.3068      | 258.93121    | 11.76223     | 50.7258 |
| 2      | 7.916         | VB   | 0.4367      | 251.52098    | 7.83064      | 49.2742 |

Totals : 510.45219 19.59287

Signal 3: DAD1 C, Sig=210,8 Ref=360,100

| Peak # | RetTime [min] | Type | Width [min] | Area [mAU*s] | Height [mAU] | Area %  |
|--------|---------------|------|-------------|--------------|--------------|---------|
| 1      | 6.920         | BV   | 0.3273      | 8671.25391   | 378.41690    | 47.6783 |
| 2      | 7.914         | VB   | 0.5259      | 9515.76563   | 259.42557    | 52.3217 |

Totals : 1.81870e4 637.84247

Signal 4: DAD1 D, Sig=220,2 Ref=360,100

| Peak # | RetTime [min] | Type | Width [min] | Area [mAU*s] | Height [mAU] | Area %  |
|--------|---------------|------|-------------|--------------|--------------|---------|
| 1      | 6.920         | VV   | 0.3215      | 3411.57471   | 152.21196    | 48.8617 |
| 2      | 7.911         | VB   | 0.4968      | 3570.53491   | 102.90866    | 51.1383 |

Data File C:\CHEM32\1\DATA\ZHU\NAOYUKI\_LC 2014-06-19 00-20-20\4-144OT2.D

Sample Name: 4-144

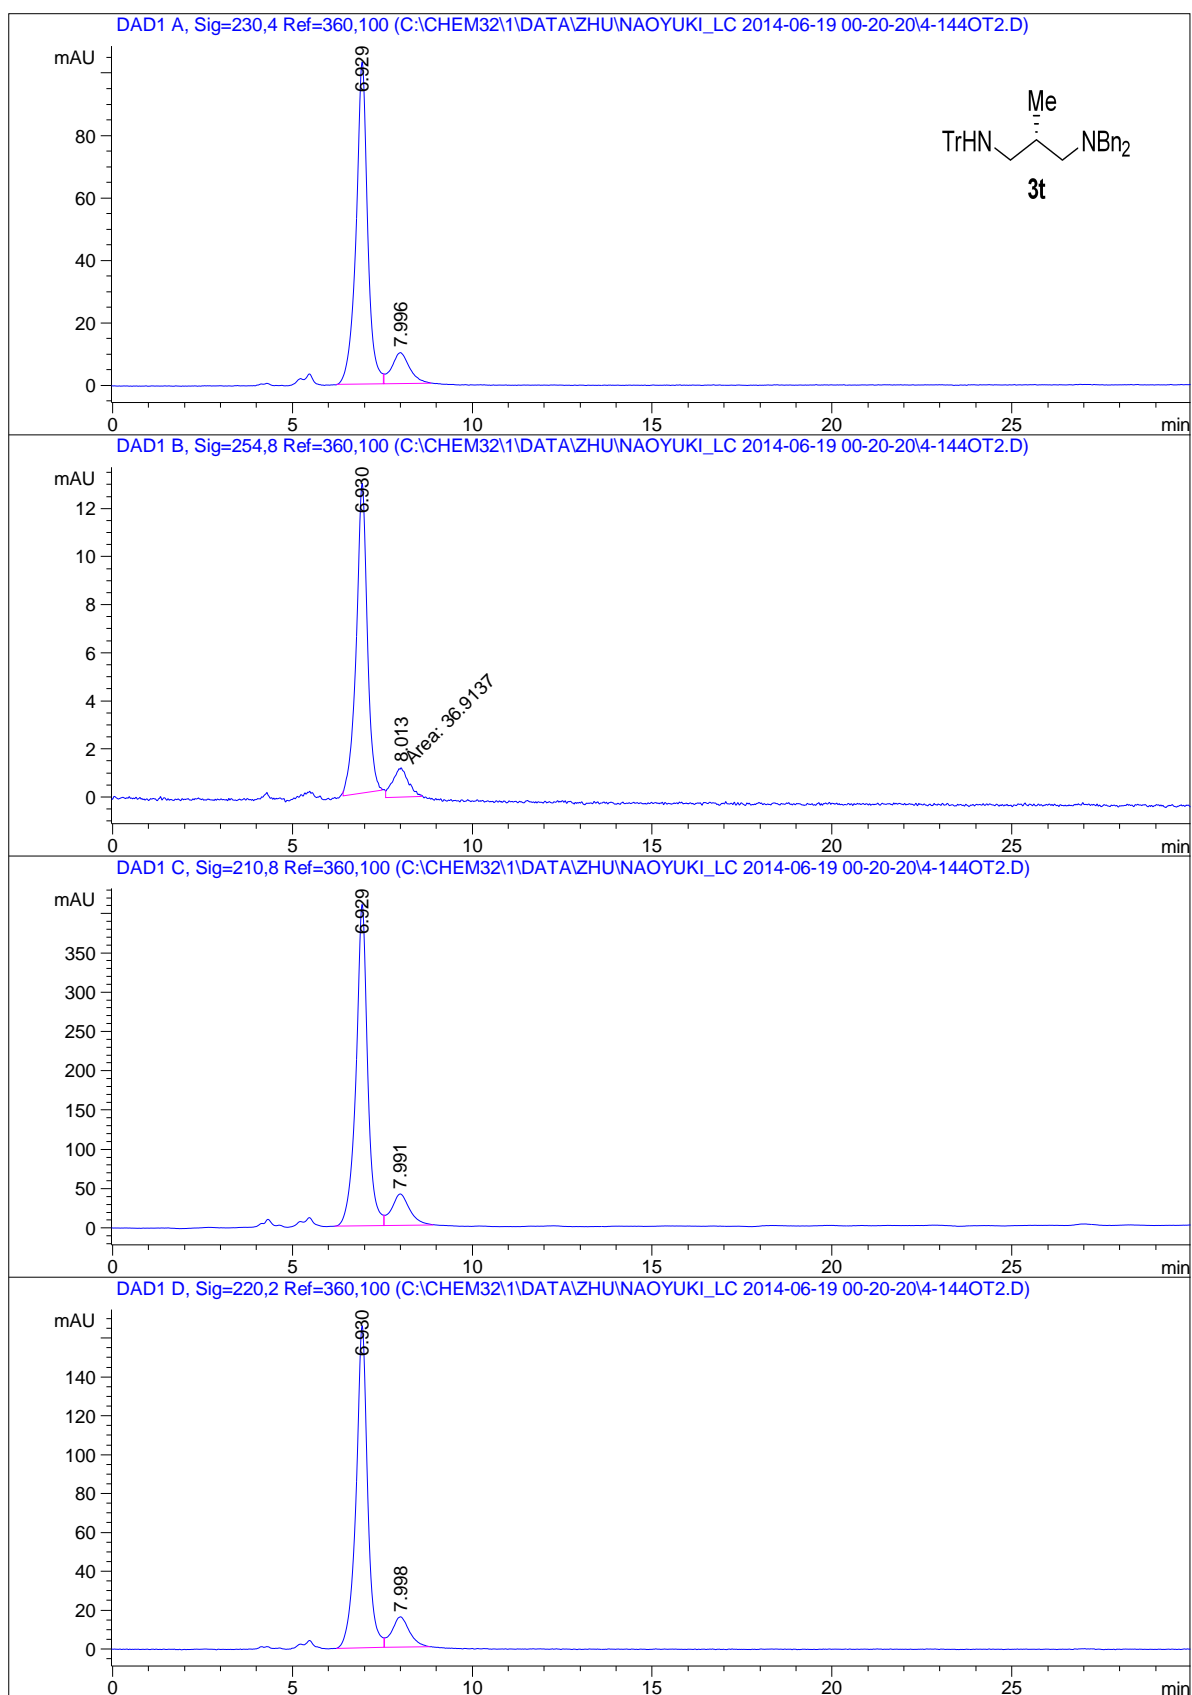

Data File C:\CHEM32\1\DATA\ZHU\NAOYUKI\_LC 2014-06-19 00-20-20\4-144OT2.D  
 Sample Name: 4-144

=====  
 Area Percent Report  
 =====

Sorted By : Signal  
 Multiplier: : 1.0000  
 Dilution: : 1.0000  
 Use Multiplier & Dilution Factor with ISTDs

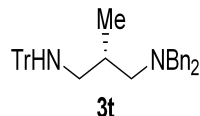

Signal 1: DAD1 A, Sig=230,4 Ref=360,100

| Peak # | RetTime [min] | Type | Width [min] | Area [mAU*s] | Height [mAU] | Area %  |
|--------|---------------|------|-------------|--------------|--------------|---------|
| 1      | 6.929         | BB   | 0.3235      | 2311.72388   | 103.14684    | 86.8229 |
| 2      | 7.996         | BB   | 0.4543      | 350.85001    | 10.02393     | 13.1771 |

Totals : 2662.57388 113.17077

Signal 2: DAD1 B, Sig=254,8 Ref=360,100

| Peak # | RetTime [min] | Type | Width [min] | Area [mAU*s] | Height [mAU] | Area %  |
|--------|---------------|------|-------------|--------------|--------------|---------|
| 1      | 6.930         | BB   | 0.3093      | 275.48633    | 12.89449     | 88.1838 |
| 2      | 8.013         | MM   | 0.5036      | 36.91371     | 1.22172      | 11.8162 |

Totals : 312.40004 14.11621

Signal 3: DAD1 C, Sig=210,8 Ref=360,100

| Peak # | RetTime [min] | Type | Width [min] | Area [mAU*s] | Height [mAU] | Area %  |
|--------|---------------|------|-------------|--------------|--------------|---------|
| 1      | 6.929         | BV   | 0.3252      | 9225.13281   | 408.92981    | 86.7127 |
| 2      | 7.991         | VB   | 0.4809      | 1413.60596   | 40.13779     | 13.2873 |

Totals : 1.06387e4 449.06760

Signal 4: DAD1 D, Sig=220,2 Ref=360,100

| Peak # | RetTime [min] | Type | Width [min] | Area [mAU*s] | Height [mAU] | Area %  |
|--------|---------------|------|-------------|--------------|--------------|---------|
| 1      | 6.930         | BB   | 0.3213      | 3715.90112   | 165.91286    | 87.1998 |
| 2      | 7.998         | BB   | 0.4161      | 545.46191    | 15.82794     | 12.8002 |

Data File C:\CHEM32\1\DATA\ZHU\ZY 2014-09-15 17-57-02\4-144-R2OT.D

Sample Name: 4-144-RECRY

```

=====
Acq. Operator   : NN                               Seq. Line :    2
Acq. Instrument : Instrument 1                     Location  : Vial 61
Injection Date  : 9/15/2014 6:20:37 PM           Inj       :    1
                                                    Inj Volume: 5 µl
Different Inj Volume from Sequence ! Actual Inj Volume : 3 µl
Acq. Method     : C:\CHEM32\1\DATA\ZHU\ZY 2014-09-15 17-57-02\02-30.M
Last changed    : 9/15/2014 6:00:54 PM by NN     (modified after loading)
Analysis Method : C:\CHEM32\1\METHODS\YMWHEXANES_PT8.M
Last changed    : 9/6/2014 5:50:51 PM by RZ     (modified after loading)
  
```

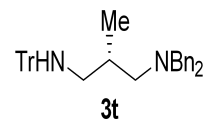

After recrystallization from  
ethyl ether/MeOH

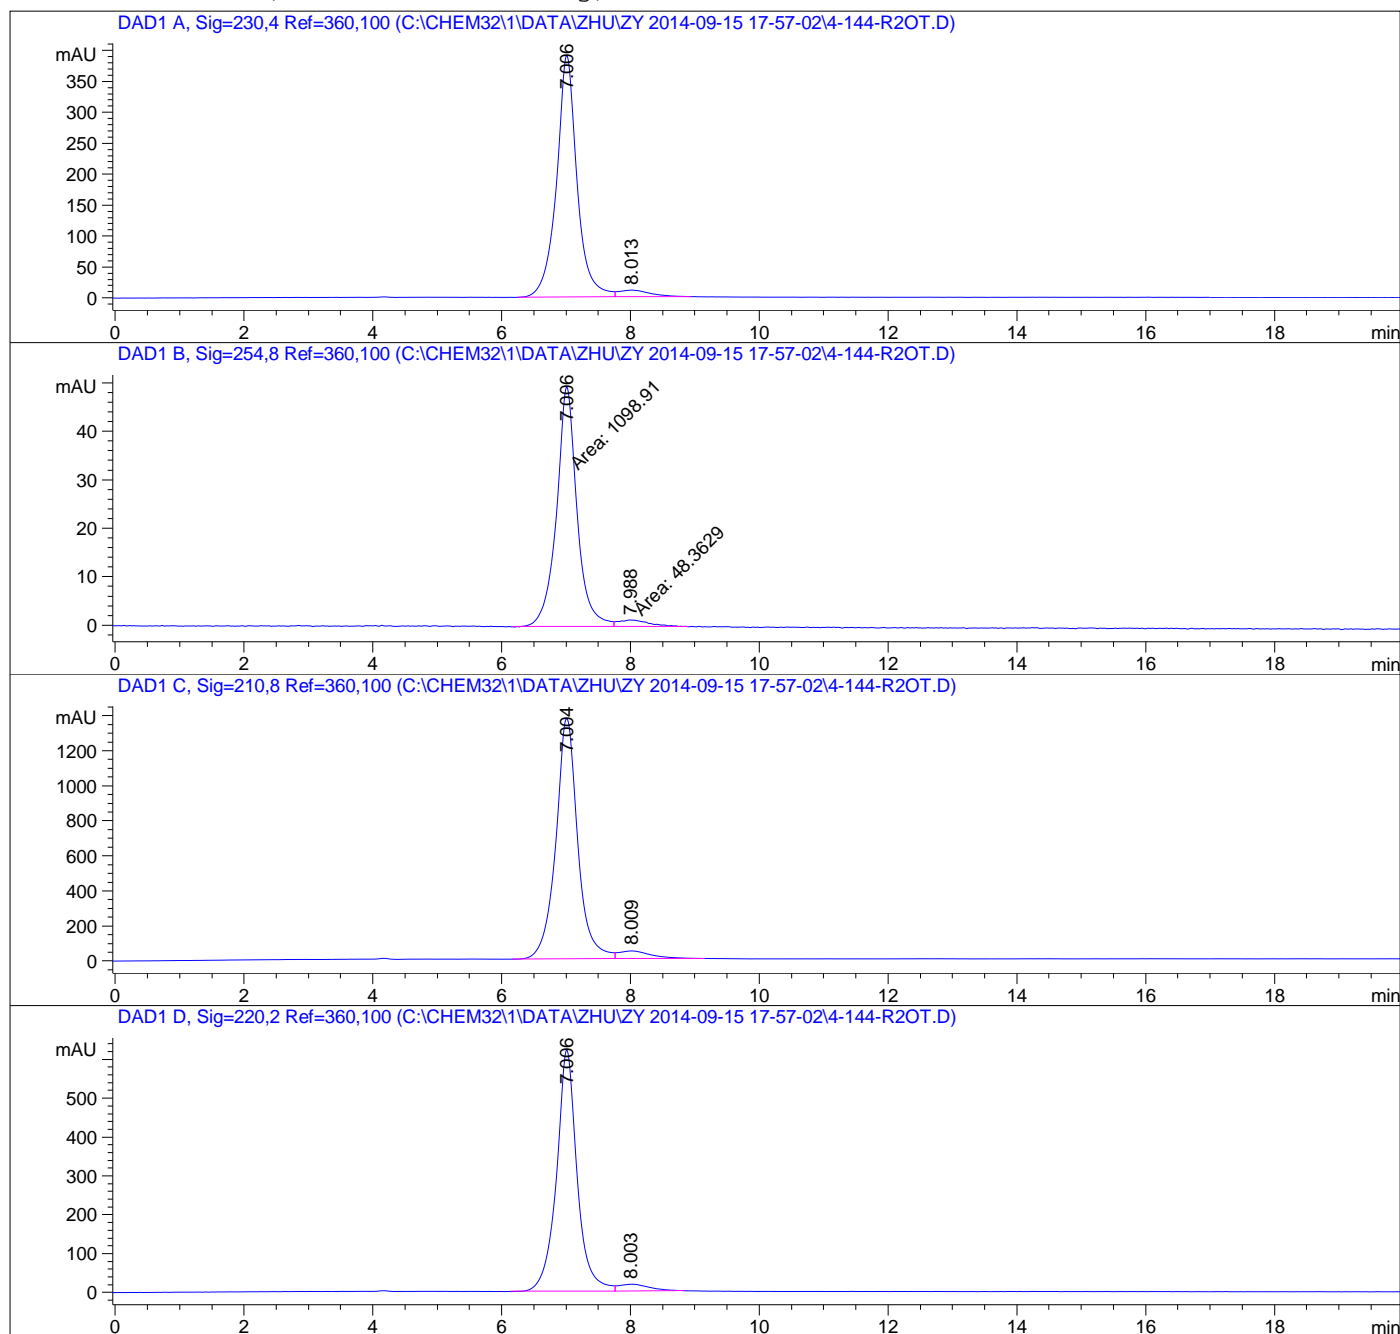

Data File C:\CHEM32\1\DATA\ZHU\ZY 2014-09-15 17-57-02\4-144-R2OT.D

Sample Name: 4-144-RECRY

 =====  
 Area Percent Report  
 =====

 Sorted By : Signal  
 Multiplier: : 1.0000  
 Dilution: : 1.0000  
 Use Multiplier & Dilution Factor with ISTDs
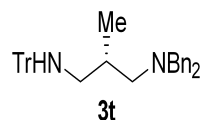
 After recrystallization from  
 ethyl ether/MeOH

Signal 1: DAD1 A, Sig=230,4 Ref=360,100

| Peak # | RetTime [min] | Type | Width [min] | Area [mAU*s] | Height [mAU] | Area %  |
|--------|---------------|------|-------------|--------------|--------------|---------|
| 1      | 7.006         | BB   | 0.3231      | 8671.38867   | 390.45584    | 95.8083 |
| 2      | 8.013         | BB   | 0.4118      | 379.38574    | 11.07224     | 4.1917  |

Totals : 9050.77441 401.52808

Signal 2: DAD1 B, Sig=254,8 Ref=360,100

| Peak # | RetTime [min] | Type | Width [min] | Area [mAU*s] | Height [mAU] | Area %  |
|--------|---------------|------|-------------|--------------|--------------|---------|
| 1      | 7.006         | MF   | 0.3701      | 1098.90710   | 49.48890     | 95.7845 |
| 2      | 7.988         | FM   | 0.5737      | 48.36290     | 1.40492      | 4.2155  |

Totals : 1147.27001 50.89382

Signal 3: DAD1 C, Sig=210,8 Ref=360,100

| Peak # | RetTime [min] | Type | Width [min] | Area [mAU*s] | Height [mAU] | Area %  |
|--------|---------------|------|-------------|--------------|--------------|---------|
| 1      | 7.004         | BV   | 0.3469      | 3.25558e4    | 1371.63477   | 95.3809 |
| 2      | 8.009         | VB   | 0.4752      | 1576.60876   | 44.72670     | 4.6191  |

Totals : 3.41324e4 1416.36147

Signal 4: DAD1 D, Sig=220,2 Ref=360,100

| Peak # | RetTime [min] | Type | Width [min] | Area [mAU*s] | Height [mAU] | Area %  |
|--------|---------------|------|-------------|--------------|--------------|---------|
| 1      | 7.006         | VV   | 0.3228      | 1.38906e4    | 621.35077    | 95.7627 |
| 2      | 8.003         | VV   | 0.4125      | 614.62653    | 17.90522     | 4.2373  |



Data File C:\CHEM32\1\DATA\ZHU\NAOYUKI\_LC 2014-06-16 12-52-45\4-132-2OD5-.D

Sample Name: 4-132-2RAC

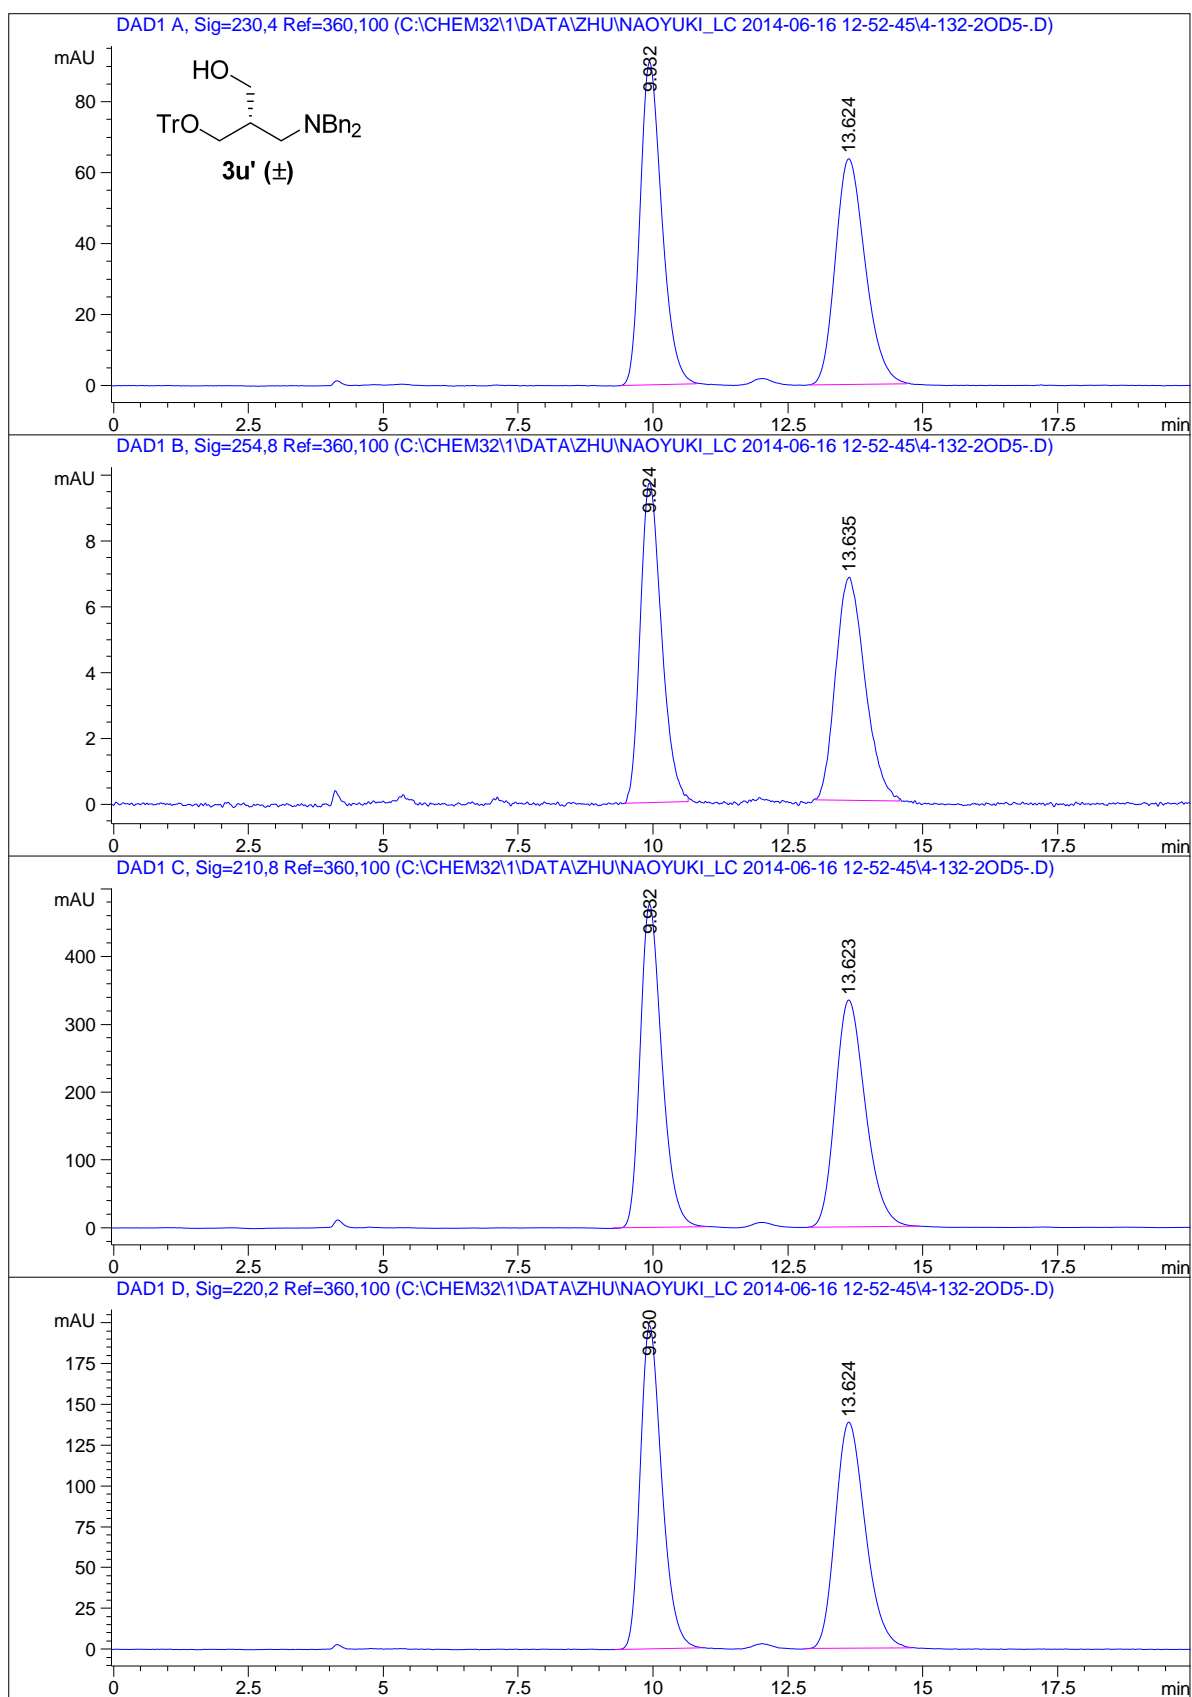

Data File C:\CHEM32\1\DATA\ZHU\NAOYUKI\_LC 2014-06-16 12-52-45\4-132-2OD5-.D  
 Sample Name: 4-132-2RAC

=====  
 Area Percent Report  
 =====

Sorted By : Signal  
 Multiplier: : 1.0000  
 Dilution: : 1.0000  
 Use Multiplier & Dilution Factor with ISTDs

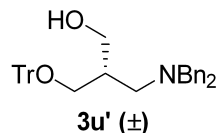

Signal 1: DAD1 A, Sig=230,4 Ref=360,100

| Peak # | RetTime [min] | Type | Width [min] | Area [mAU*s] | Height [mAU] | Area %  |
|--------|---------------|------|-------------|--------------|--------------|---------|
| 1      | 9.932         | BB   | 0.4289      | 2533.77588   | 90.99421     | 50.7643 |
| 2      | 13.624        | BB   | 0.5722      | 2457.47656   | 63.68421     | 49.2357 |

Totals : 4991.25244 154.67842

Signal 2: DAD1 B, Sig=254,8 Ref=360,100

| Peak # | RetTime [min] | Type | Width [min] | Area [mAU*s] | Height [mAU] | Area %  |
|--------|---------------|------|-------------|--------------|--------------|---------|
| 1      | 9.924         | BB   | 0.4068      | 266.56473    | 9.69301      | 50.9082 |
| 2      | 13.635        | BB   | 0.4563      | 257.05328    | 6.78068      | 49.0918 |

Totals : 523.61801 16.47370

Signal 3: DAD1 C, Sig=210,8 Ref=360,100

| Peak # | RetTime [min] | Type | Width [min] | Area [mAU*s] | Height [mAU] | Area %  |
|--------|---------------|------|-------------|--------------|--------------|---------|
| 1      | 9.932         | BB   | 0.4225      | 1.33378e4    | 476.59531    | 50.6475 |
| 2      | 13.623        | BB   | 0.5848      | 1.29967e4    | 334.83649    | 49.3525 |

Totals : 2.63345e4 811.43179

Signal 4: DAD1 D, Sig=220,2 Ref=360,100

| Peak # | RetTime [min] | Type | Width [min] | Area [mAU*s] | Height [mAU] | Area %  |
|--------|---------------|------|-------------|--------------|--------------|---------|
| 1      | 9.930         | VB   | 0.4287      | 5515.77930   | 198.18132    | 50.7042 |
| 2      | 13.624        | BB   | 0.5927      | 5362.56543   | 138.82190    | 49.2958 |

Data File C:\CHEM32\1\DATA\ZHU\NAOYUKI\_LC 2014-06-16 12-52-45\4-134-2OD5-.D

Sample Name: 4-134-2

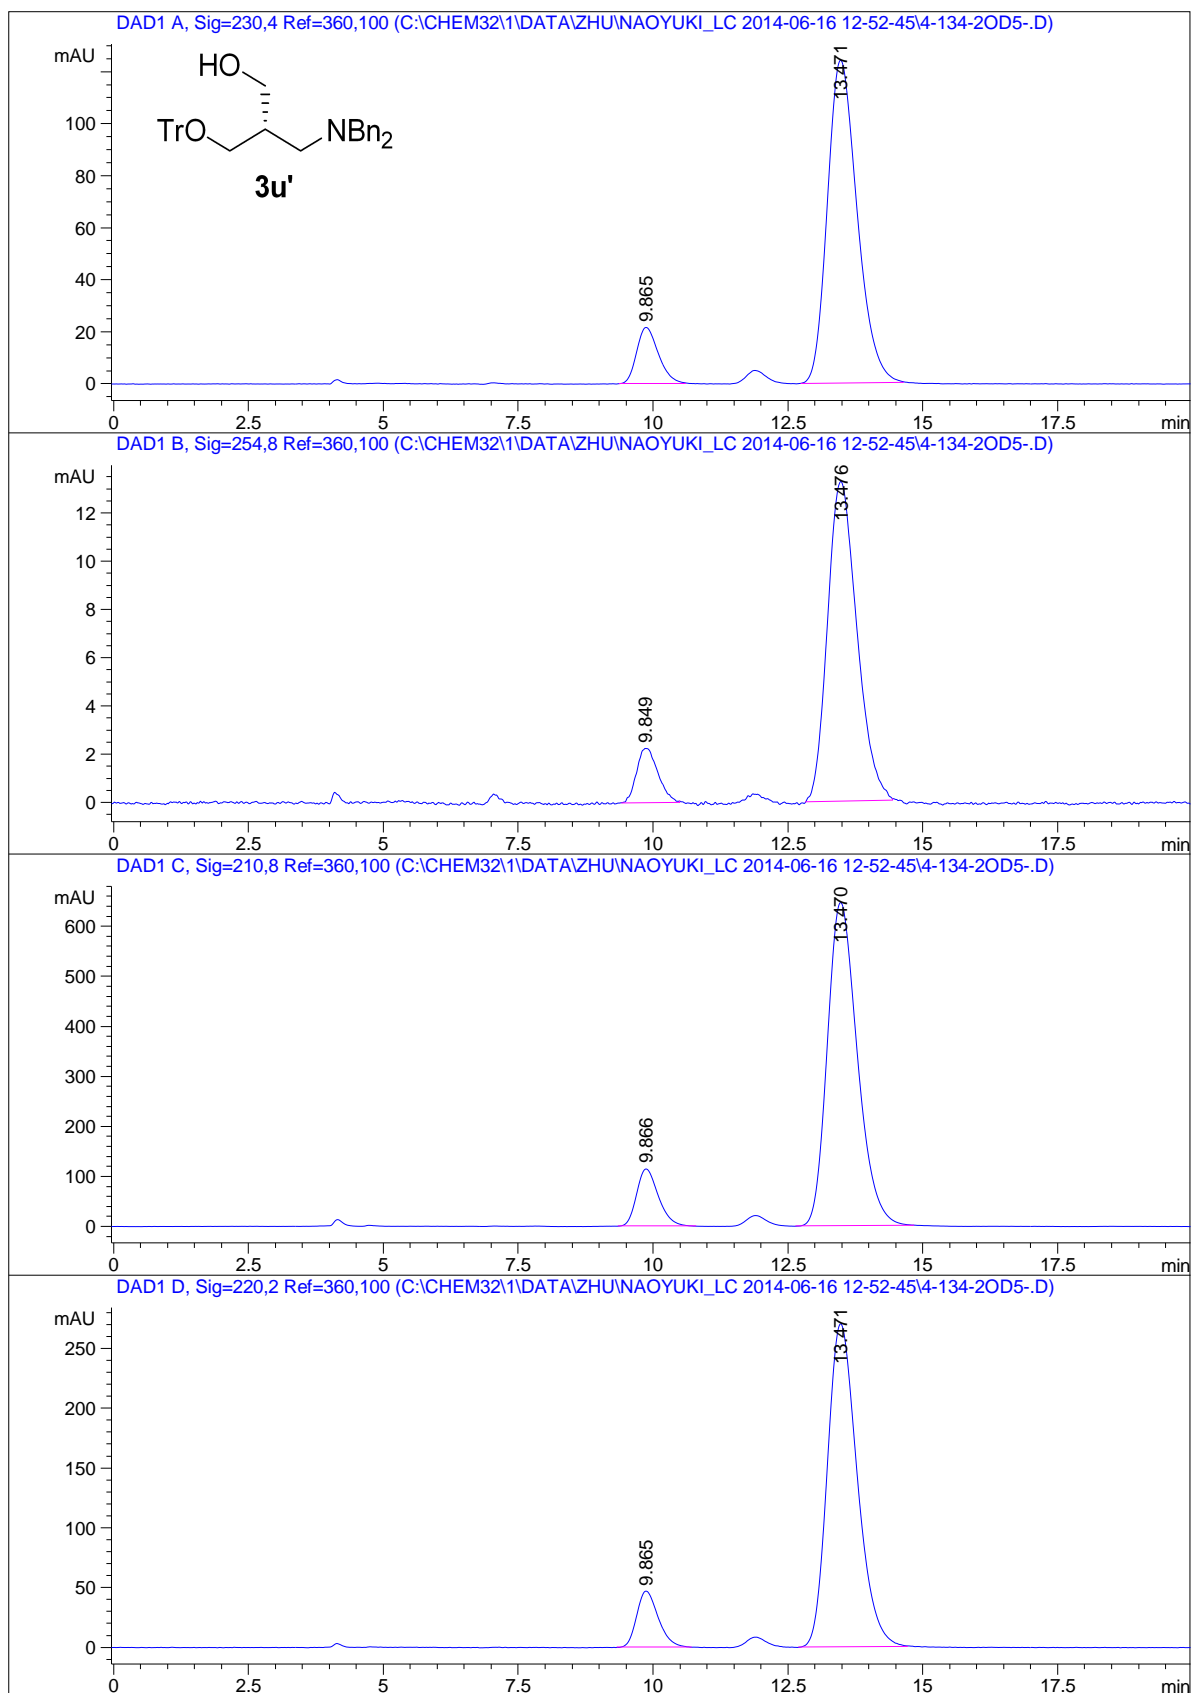

Data File C:\CHEM32\1\DATA\ZHU\NAOYUKI\_LC 2014-06-16 12-52-45\4-134-2OD5-.D  
 Sample Name: 4-134-2

=====  
 Area Percent Report  
 =====

Sorted By : Signal  
 Multiplier: : 1.0000  
 Dilution: : 1.0000  
 Use Multiplier & Dilution Factor with ISTDs

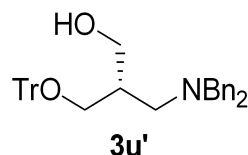

Signal 1: DAD1 A, Sig=230,4 Ref=360,100

| Peak # | RetTime [min] | Type | Width [min] | Area [mAU*s] | Height [mAU] | Area %  |
|--------|---------------|------|-------------|--------------|--------------|---------|
| 1      | 9.865         | BB   | 0.4278      | 607.15289    | 21.60720     | 11.2987 |
| 2      | 13.471        | BB   | 0.5958      | 4766.50537   | 124.18014    | 88.7013 |

Totals : 5373.65826 145.78734

Signal 2: DAD1 B, Sig=254,8 Ref=360,100

| Peak # | RetTime [min] | Type | Width [min] | Area [mAU*s] | Height [mAU] | Area %  |
|--------|---------------|------|-------------|--------------|--------------|---------|
| 1      | 9.849         | BB   | 0.3302      | 62.83102     | 2.26076      | 11.1210 |
| 2      | 13.476        | BB   | 0.5217      | 502.14331    | 13.26266     | 88.8790 |

Totals : 564.97433 15.52342

Signal 3: DAD1 C, Sig=210,8 Ref=360,100

| Peak # | RetTime [min] | Type | Width [min] | Area [mAU*s] | Height [mAU] | Area %  |
|--------|---------------|------|-------------|--------------|--------------|---------|
| 1      | 9.866         | BB   | 0.4282      | 3219.06421   | 114.41489    | 11.3991 |
| 2      | 13.470        | BB   | 0.5977      | 2.50206e4    | 646.21539    | 88.6009 |

Totals : 2.82397e4 760.63029

Signal 4: DAD1 D, Sig=220,2 Ref=360,100

| Peak # | RetTime [min] | Type | Width [min] | Area [mAU*s] | Height [mAU] | Area %  |
|--------|---------------|------|-------------|--------------|--------------|---------|
| 1      | 9.865         | BB   | 0.4204      | 1317.27222   | 47.08005     | 11.2455 |
| 2      | 13.471        | BB   | 0.5788      | 1.03965e4    | 270.28958    | 88.7545 |

Data File C:\CHEM32\1\DATA\ZHU\NAOYUKI\_LC 2014-06-16 17-30-04\SZ4-131-2OD5.D

Sample Name: 4-131-2RAC

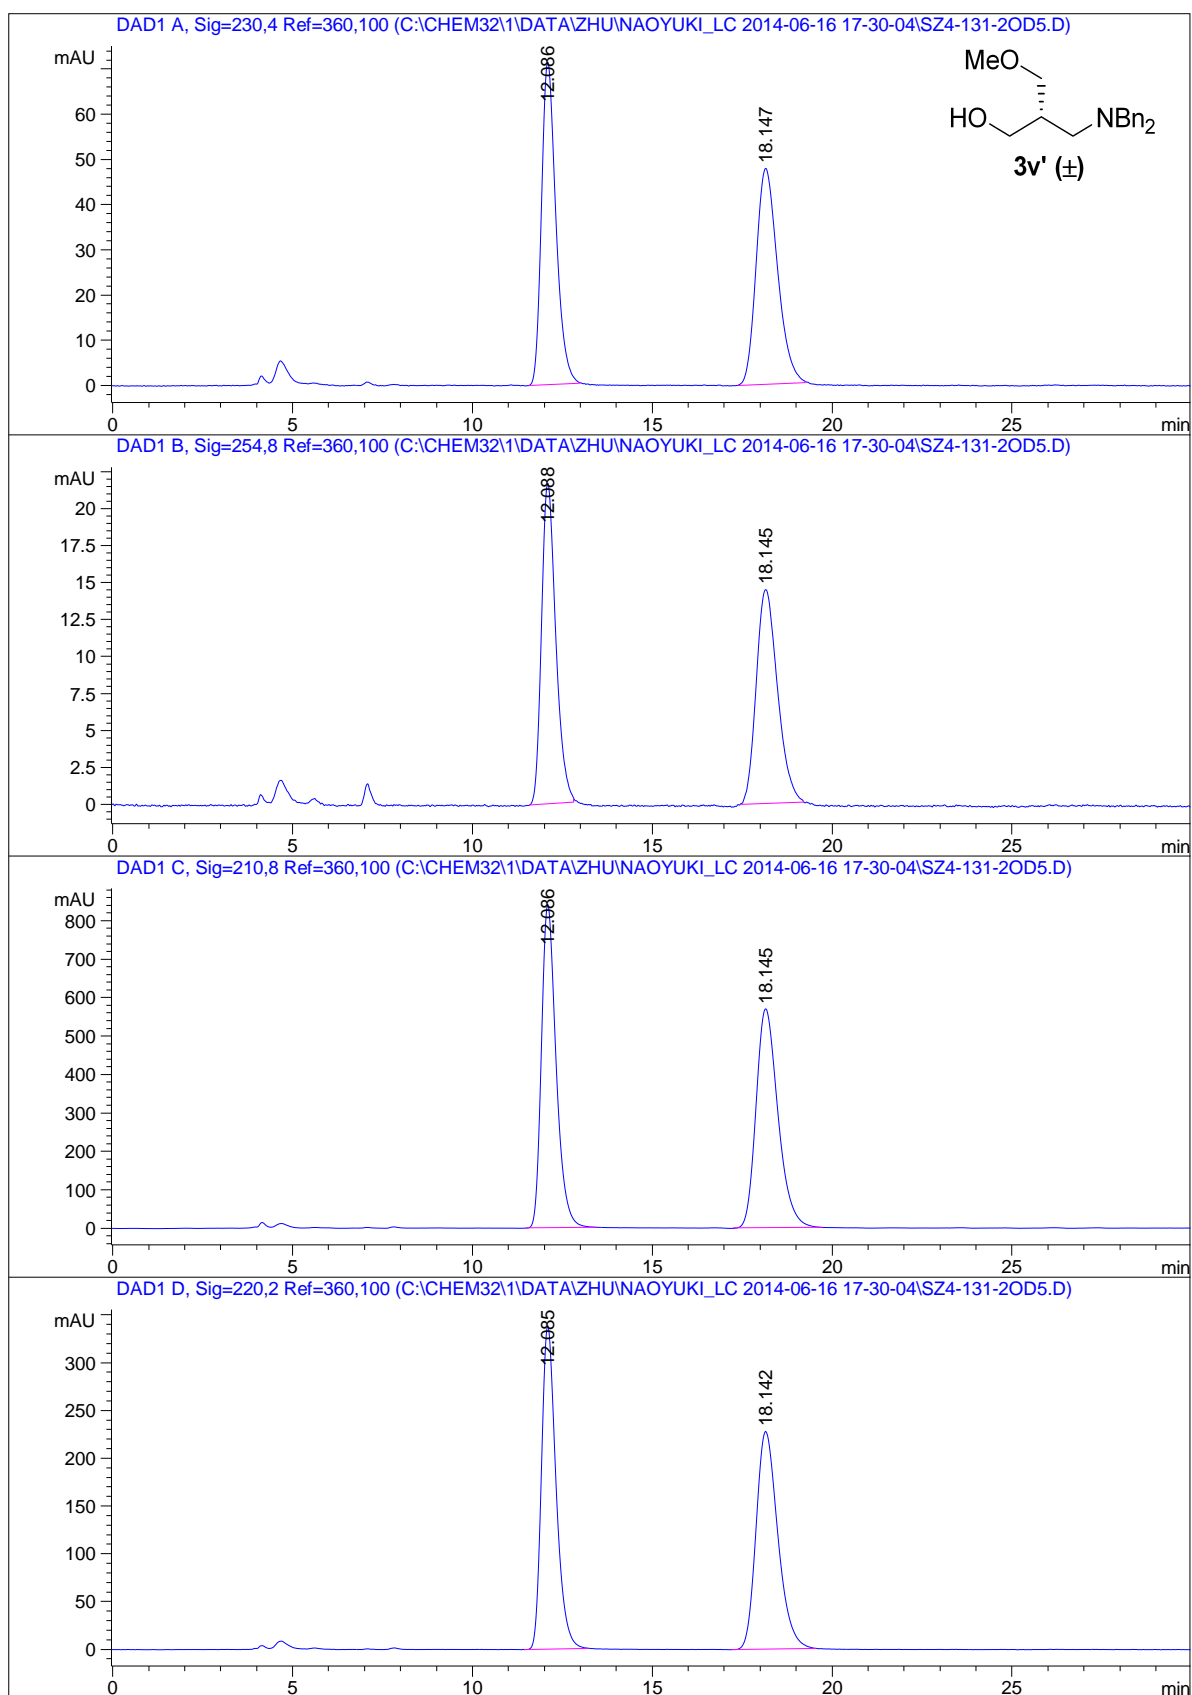

Data File C:\CHEM32\1\DATA\ZHU\NAOYUKI\_LC 2014-06-16 17-30-04\SZ4-131-20D5.D  
 Sample Name: 4-131-2RAC

=====  
 Area Percent Report  
 =====

Sorted By : Signal  
 Multiplier: : 1.0000  
 Dilution: : 1.0000  
 Use Multiplier & Dilution Factor with ISTDs

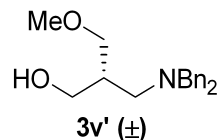

Signal 1: DAD1 A, Sig=230,4 Ref=360,100

| Peak # | RetTime [min] | Type | Width [min] | Area [mAU*s] | Height [mAU] | Area %  |
|--------|---------------|------|-------------|--------------|--------------|---------|
| 1      | 12.086        | BB   | 0.4250      | 1989.29346   | 71.40551     | 50.0320 |
| 2      | 18.147        | BB   | 0.6027      | 1986.74927   | 47.82552     | 49.9680 |

Totals : 3976.04272 119.23103

Signal 2: DAD1 B, Sig=254,8 Ref=360,100

| Peak # | RetTime [min] | Type | Width [min] | Area [mAU*s] | Height [mAU] | Area %  |
|--------|---------------|------|-------------|--------------|--------------|---------|
| 1      | 12.088        | BB   | 0.4137      | 598.18109    | 21.69661     | 49.9848 |
| 2      | 18.145        | BB   | 0.5493      | 598.54535    | 14.50902     | 50.0152 |

Totals : 1196.72644 36.20562

Signal 3: DAD1 C, Sig=210,8 Ref=360,100

| Peak # | RetTime [min] | Type | Width [min] | Area [mAU*s] | Height [mAU] | Area %  |
|--------|---------------|------|-------------|--------------|--------------|---------|
| 1      | 12.086        | BB   | 0.4327      | 2.38480e4    | 841.37036    | 49.6299 |
| 2      | 18.145        | BB   | 0.6511      | 2.42037e4    | 570.29602    | 50.3701 |

Totals : 4.80517e4 1411.66638

Signal 4: DAD1 D, Sig=220,2 Ref=360,100

| Peak # | RetTime [min] | Type | Width [min] | Area [mAU*s] | Height [mAU] | Area %  |
|--------|---------------|------|-------------|--------------|--------------|---------|
| 1      | 12.085        | VB   | 0.4301      | 9523.86133   | 338.67139    | 49.7844 |
| 2      | 18.142        | BB   | 0.6356      | 9606.36621   | 227.98479    | 50.2156 |

Data File C:\CHEM32\1\DATA\ZHU\NAOYUKI\_LC 2014-06-16 17-30-04\SZ4-141-2OD5.D

Sample Name: 4-141-2

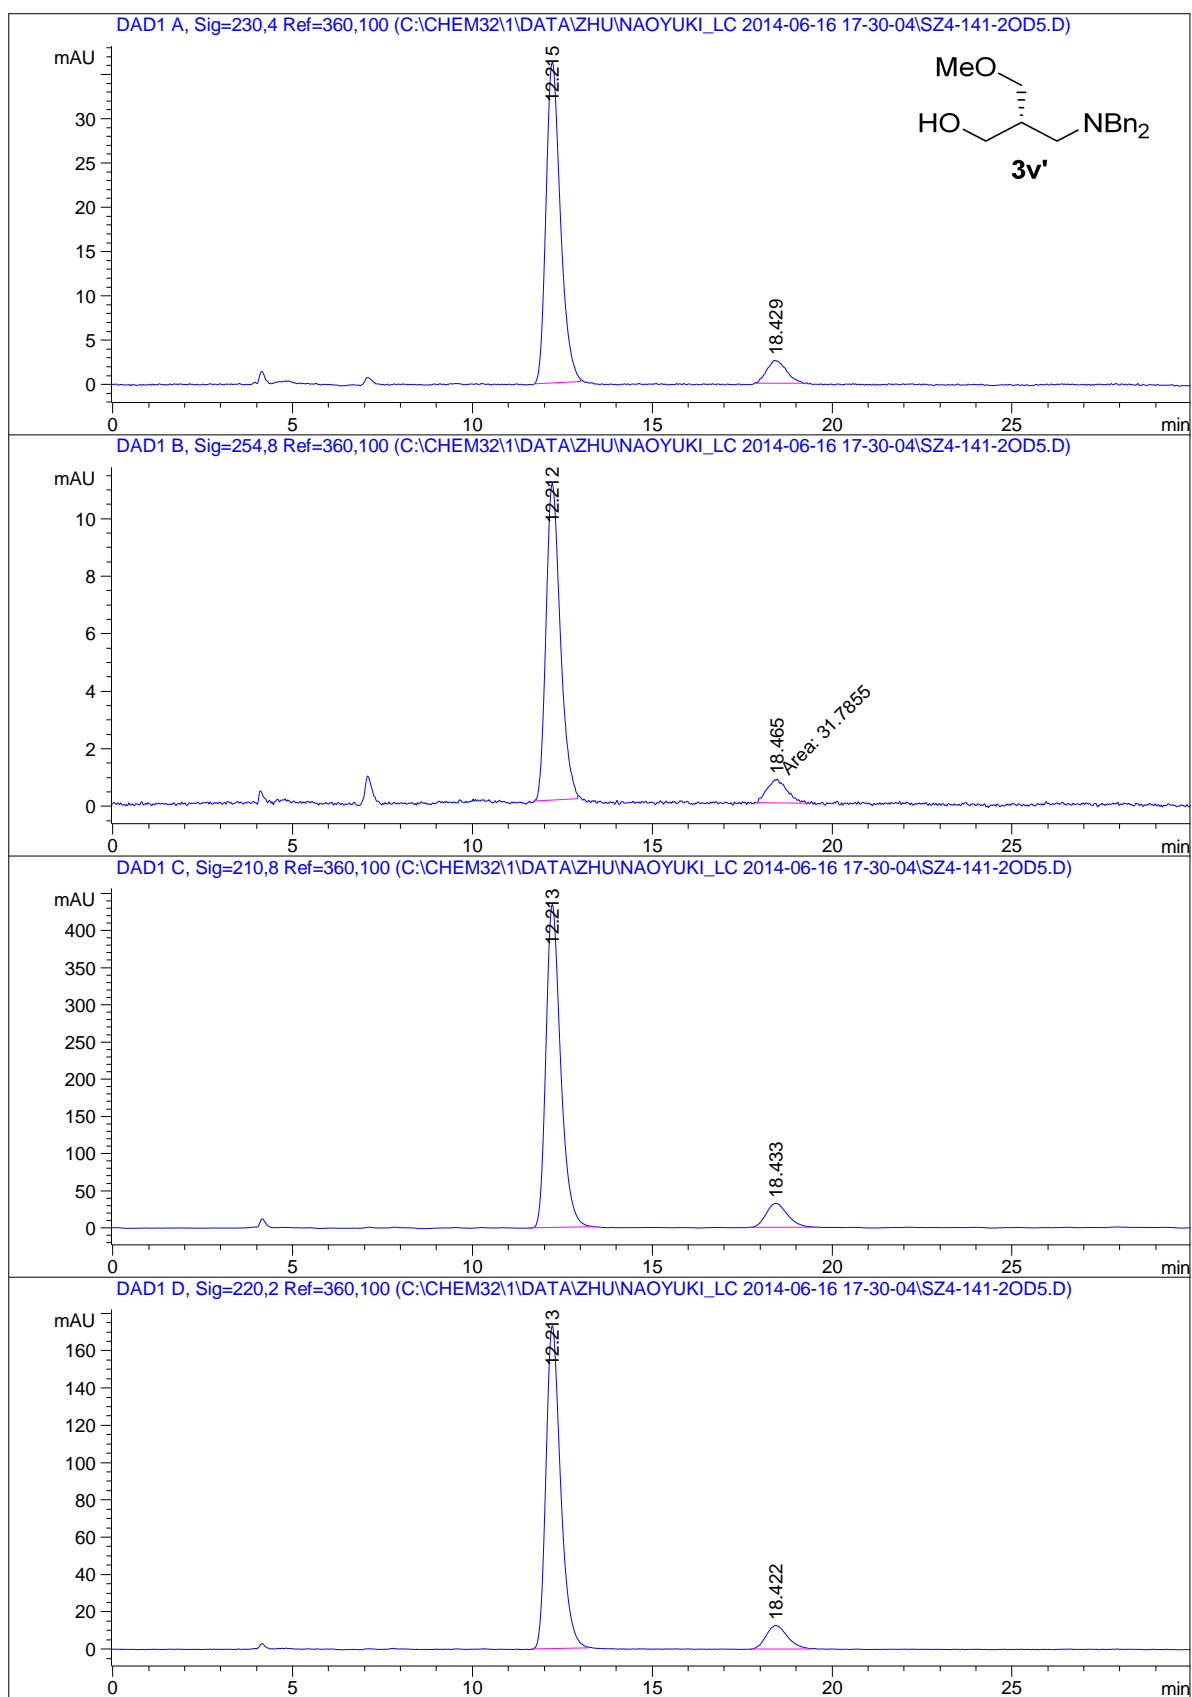

Data File C:\CHEM32\1\DATA\ZHU\NAOYUKI\_LC 2014-06-16 17-30-04\SZ4-141-20D5.D  
 Sample Name: 4-141-2

=====  
 Area Percent Report  
 =====

Sorted By : Signal  
 Multiplier: : 1.0000  
 Dilution: : 1.0000  
 Use Multiplier & Dilution Factor with ISTDs

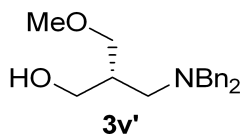

Signal 1: DAD1 A, Sig=230,4 Ref=360,100

| Peak # | RetTime [min] | Type | Width [min] | Area [mAU*s] | Height [mAU] | Area %  |
|--------|---------------|------|-------------|--------------|--------------|---------|
| 1      | 12.215        | BB   | 0.4219      | 1013.01355   | 36.26049     | 90.9484 |
| 2      | 18.429        | BB   | 0.4605      | 100.81927    | 2.59961      | 9.0516  |

Totals : 1113.83282 38.86010

Signal 2: DAD1 B, Sig=254,8 Ref=360,100

| Peak # | RetTime [min] | Type | Width [min] | Area [mAU*s] | Height [mAU] | Area %  |
|--------|---------------|------|-------------|--------------|--------------|---------|
| 1      | 12.212        | BB   | 0.4198      | 304.01303    | 11.02126     | 90.5343 |
| 2      | 18.465        | MF   | 0.6388      | 31.78552     | 8.29257e-1   | 9.4657  |

Totals : 335.79855 11.85052

Signal 3: DAD1 C, Sig=210,8 Ref=360,100

| Peak # | RetTime [min] | Type | Width [min] | Area [mAU*s] | Height [mAU] | Area %  |
|--------|---------------|------|-------------|--------------|--------------|---------|
| 1      | 12.213        | VB   | 0.4315      | 1.23479e4    | 434.54886    | 89.9246 |
| 2      | 18.433        | BB   | 0.5295      | 1383.49695   | 32.57787     | 10.0754 |

Totals : 1.37314e4 467.12672

Signal 4: DAD1 D, Sig=220,2 Ref=360,100

| Peak # | RetTime [min] | Type | Width [min] | Area [mAU*s] | Height [mAU] | Area %  |
|--------|---------------|------|-------------|--------------|--------------|---------|
| 1      | 12.213        | BB   | 0.4237      | 4896.58301   | 173.24704    | 90.2640 |
| 2      | 18.422        | BV   | 0.4937      | 528.15222    | 12.63457     | 9.7360  |



Data File C:\CHEM32\1\DATA\ZHU\NAOYUKI\_LC 2014-05-01 13-27-24\SZ4-6OJ5ETOH.D

Sample Name: 4-6

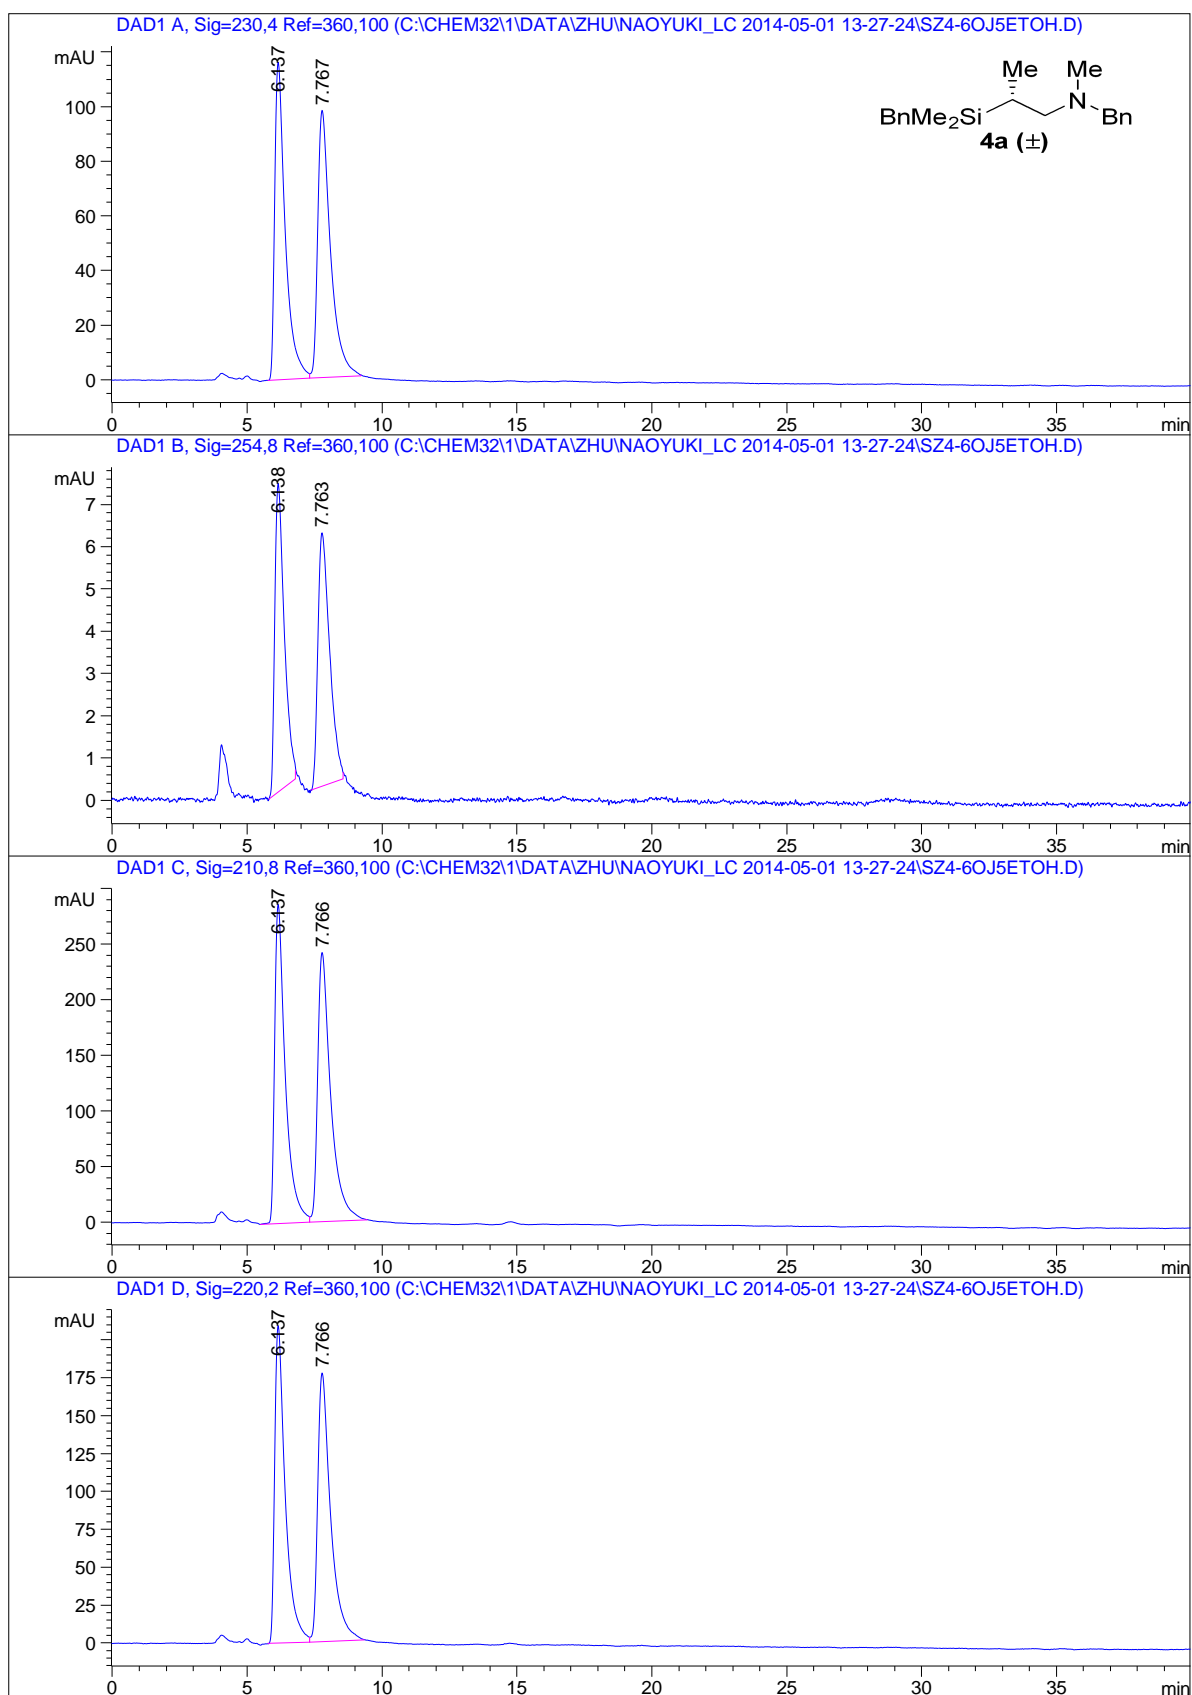

Data File C:\CHEM32\1\DATA\ZHU\NAOYUKI\_LC 2014-05-01 13-27-24\SZ4-6OJ5ETOH.D  
 Sample Name: 4-6

=====  
 Area Percent Report  
 =====

Sorted By : Signal  
 Multiplier: : 1.0000  
 Dilution: : 1.0000  
 Use Multiplier & Dilution Factor with ISTDs

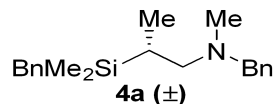

Signal 1: DAD1 A, Sig=230,4 Ref=360,100

| Peak # | RetTime [min] | Type | Width [min] | Area [mAU*s] | Height [mAU] | Area %  |
|--------|---------------|------|-------------|--------------|--------------|---------|
| 1      | 6.137         | BB   | 0.4022      | 3173.57568   | 116.34707    | 49.4173 |
| 2      | 7.767         | BB   | 0.4809      | 3248.41846   | 97.94522     | 50.5827 |

Totals : 6421.99414 214.29229

Signal 2: DAD1 B, Sig=254,8 Ref=360,100

| Peak # | RetTime [min] | Type | Width [min] | Area [mAU*s] | Height [mAU] | Area %  |
|--------|---------------|------|-------------|--------------|--------------|---------|
| 1      | 6.138         | BB   | 0.3629      | 179.75917    | 7.30953      | 49.7695 |
| 2      | 7.763         | BB   | 0.4111      | 181.42436    | 5.99388      | 50.2305 |

Totals : 361.18353 13.30340

Signal 3: DAD1 C, Sig=210,8 Ref=360,100

| Peak # | RetTime [min] | Type | Width [min] | Area [mAU*s] | Height [mAU] | Area %  |
|--------|---------------|------|-------------|--------------|--------------|---------|
| 1      | 6.137         | VV   | 0.4014      | 7900.09424   | 286.79486    | 49.2220 |
| 2      | 7.766         | VB   | 0.4946      | 8149.81885   | 242.16519    | 50.7780 |

Totals : 1.60499e4 528.96005

Signal 4: DAD1 D, Sig=220,2 Ref=360,100

| Peak # | RetTime [min] | Type | Width [min] | Area [mAU*s] | Height [mAU] | Area %  |
|--------|---------------|------|-------------|--------------|--------------|---------|
| 1      | 6.137         | BV   | 0.3910      | 5732.97607   | 209.69382    | 49.2137 |
| 2      | 7.766         | VB   | 0.4811      | 5916.17969   | 177.38121    | 50.7863 |

Data File C:\CHEM32\1\DATA\ZHU\NAOYUKI\_LC 2014-05-01 13-27-24\SZ4-25OJ5ETOH.D

Sample Name: 4-25

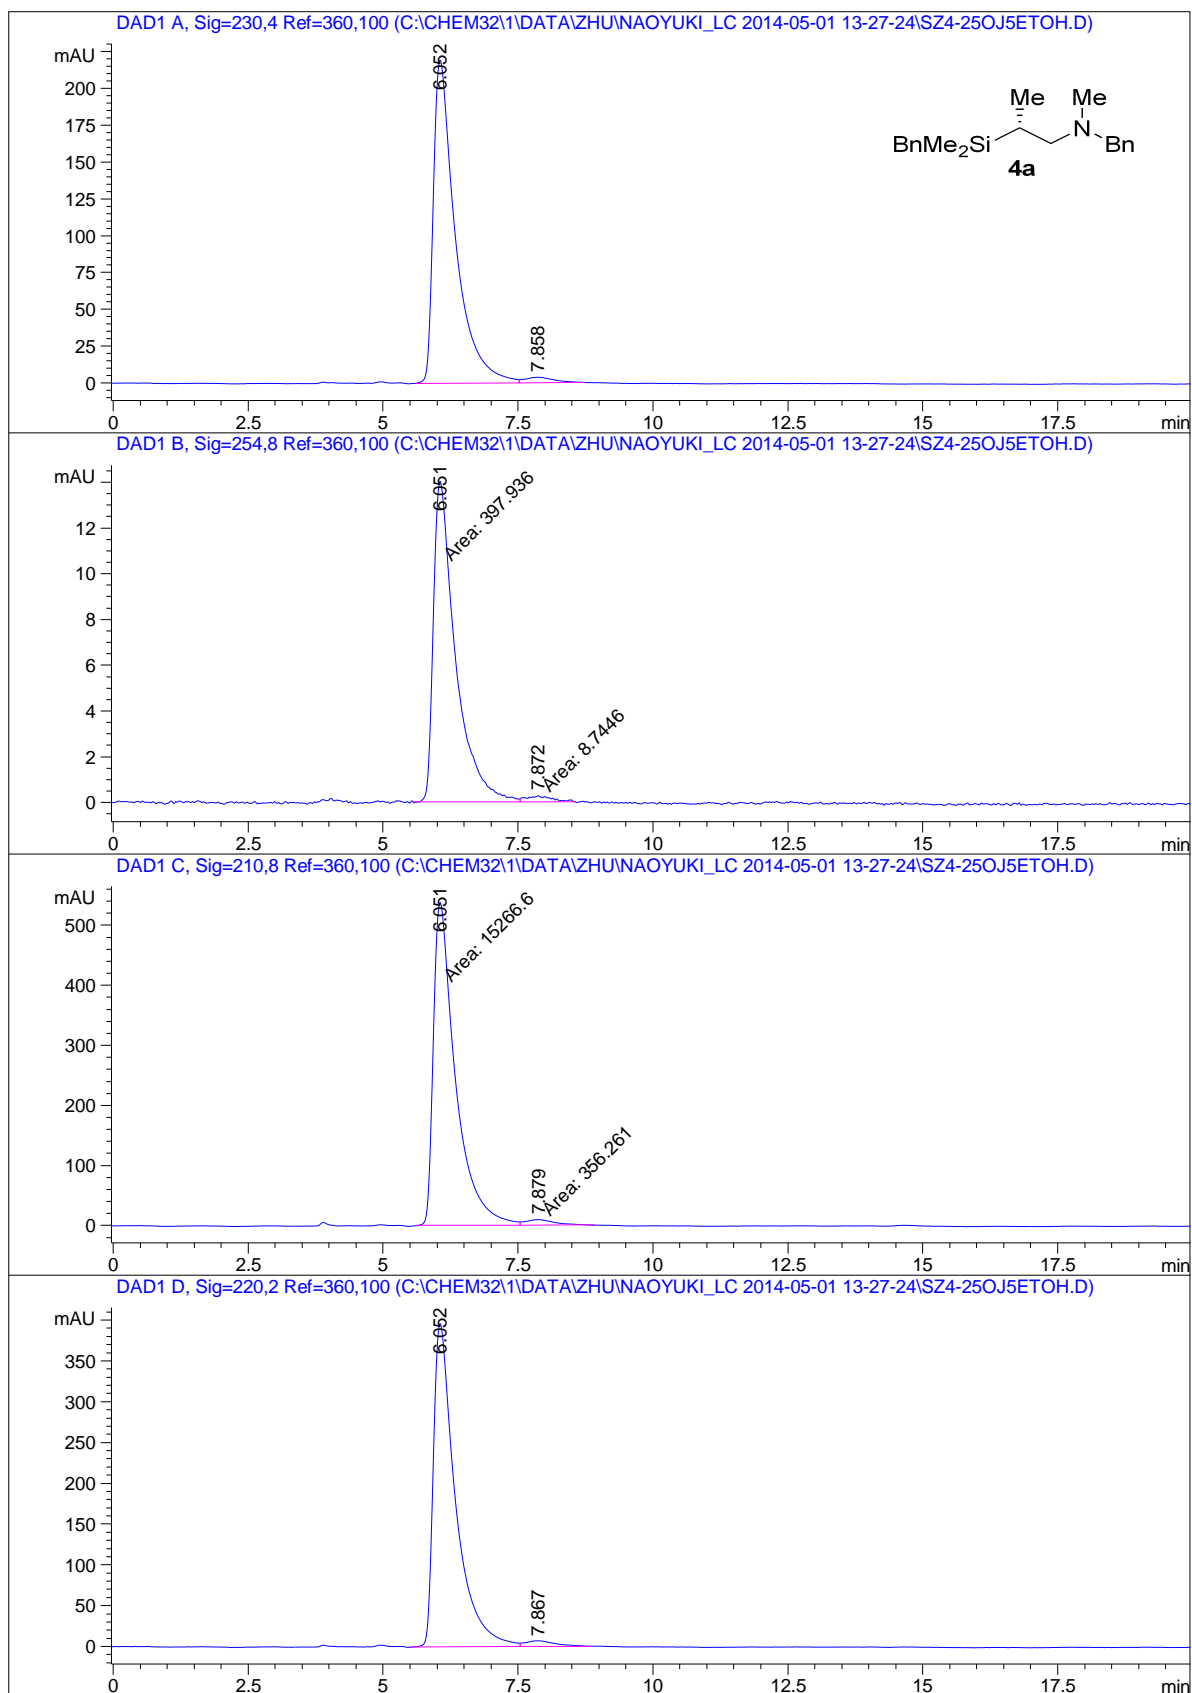

Data File C:\CHEM32\1\DATA\ZHU\NAOYUKI\_LC 2014-05-01 13-27-24\SZ4-25OJ5ETOH.D  
 Sample Name: 4-25

=====  
 Area Percent Report  
 =====

Sorted By : Signal  
 Multiplier: : 1.0000  
 Dilution: : 1.0000  
 Use Multiplier & Dilution Factor with ISTDs

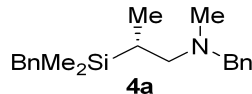

Signal 1: DAD1 A, Sig=230,4 Ref=360,100

| Peak # | RetTime [min] | Type | Width [min] | Area [mAU*s] | Height [mAU] | Area %  |
|--------|---------------|------|-------------|--------------|--------------|---------|
| 1      | 6.052         | BB   | 0.4158      | 6242.85059   | 219.49098    | 97.7232 |
| 2      | 7.858         | BB   | 0.4565      | 145.45206    | 3.87022      | 2.2768  |

Totals : 6388.30264 223.36120

Signal 2: DAD1 B, Sig=254,8 Ref=360,100

| Peak # | RetTime [min] | Type | Width [min] | Area [mAU*s] | Height [mAU] | Area %  |
|--------|---------------|------|-------------|--------------|--------------|---------|
| 1      | 6.051         | MF   | 0.4732      | 397.93604    | 14.01715     | 97.8498 |
| 2      | 7.872         | FM   | 0.5467      | 8.74460      | 2.66588e-1   | 2.1502  |

Totals : 406.68063 14.28373

Signal 3: DAD1 C, Sig=210,8 Ref=360,100

| Peak # | RetTime [min] | Type | Width [min] | Area [mAU*s] | Height [mAU] | Area %  |
|--------|---------------|------|-------------|--------------|--------------|---------|
| 1      | 6.051         | MF   | 0.4730      | 1.52666e4    | 537.88672    | 97.7196 |
| 2      | 7.879         | FM   | 0.6321      | 356.26111    | 9.39305      | 2.2804  |

Totals : 1.56229e4 547.27977

Signal 4: DAD1 D, Sig=220,2 Ref=360,100

| Peak # | RetTime [min] | Type | Width [min] | Area [mAU*s] | Height [mAU] | Area %  |
|--------|---------------|------|-------------|--------------|--------------|---------|
| 1      | 6.052         | BB   | 0.4124      | 1.12970e4    | 396.48349    | 97.5120 |
| 2      | 7.867         | BV   | 0.4700      | 288.23666    | 7.21630      | 2.4880  |

Data File C:\CHEM32\2\DATA\ZHU\HPLC 2014-07-18 20-26-05\4-210D950521.D

Sample Name: 4-210RAC

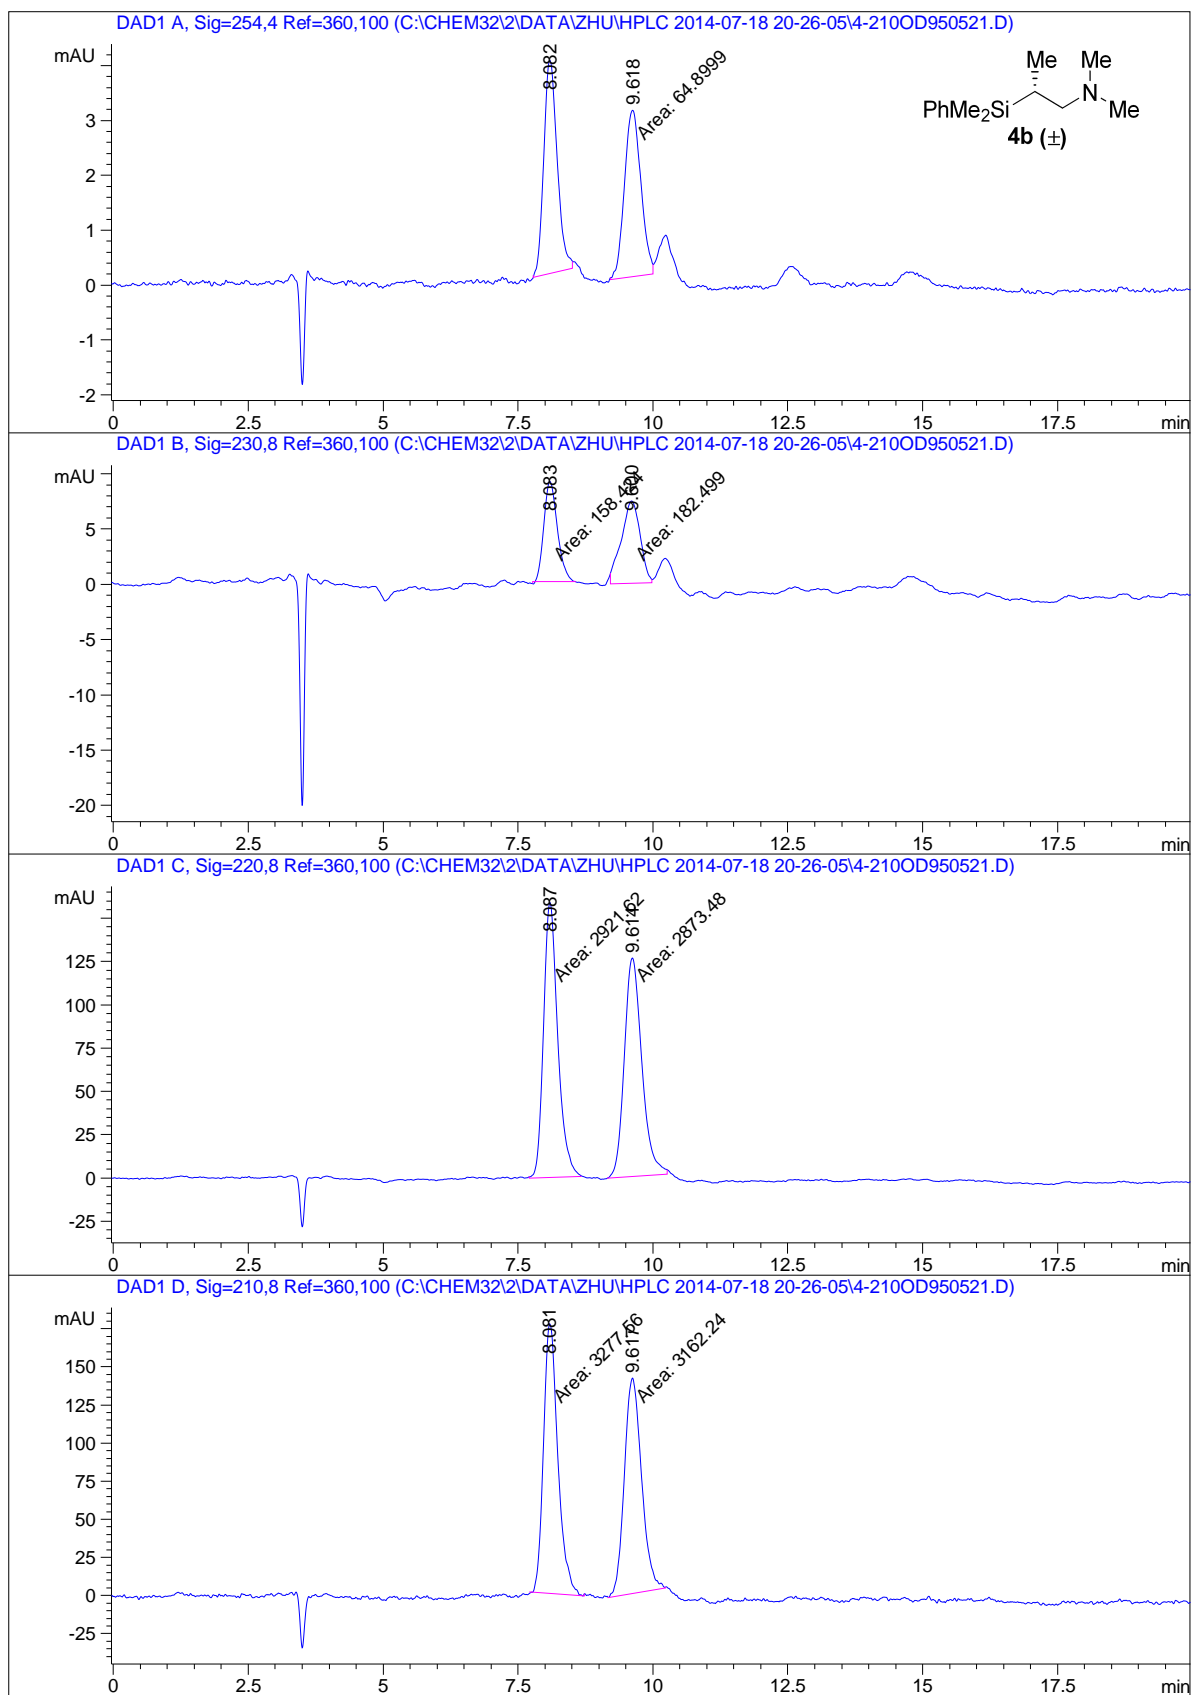

Data File C:\CHEM32\2\DATA\ZHU\HPLC 2014-07-18 20-26-05\4-2100D950521.D  
 Sample Name: 4-210RAC

=====  
 Area Percent Report  
 =====

Sorted By : Signal  
 Multiplier: : 1.0000  
 Dilution: : 1.0000  
 Use Multiplier & Dilution Factor with ISTDs

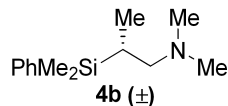

Signal 1: DAD1 A, Sig=254,4 Ref=360,100

| Peak # | RetTime [min] | Type | Width [min] | Area [mAU*s] | Height [mAU] | Area %  |
|--------|---------------|------|-------------|--------------|--------------|---------|
| 1      | 8.082         | BB   | 0.2482      | 67.50064     | 3.89427      | 50.9821 |
| 2      | 9.618         | MM   | 0.3558      | 64.89990     | 3.04010      | 49.0179 |

Totals : 132.40054 6.93437

Signal 2: DAD1 B, Sig=230,8 Ref=360,100

| Peak # | RetTime [min] | Type | Width [min] | Area [mAU*s] | Height [mAU] | Area %  |
|--------|---------------|------|-------------|--------------|--------------|---------|
| 1      | 8.083         | MM   | 0.2912      | 158.42448    | 9.06675      | 46.4692 |
| 2      | 9.600         | FM   | 0.4065      | 182.49931    | 7.48326      | 53.5308 |

Totals : 340.92380 16.55001

Signal 3: DAD1 C, Sig=220,8 Ref=360,100

| Peak # | RetTime [min] | Type | Width [min] | Area [mAU*s] | Height [mAU] | Area %  |
|--------|---------------|------|-------------|--------------|--------------|---------|
| 1      | 8.087         | MM   | 0.3064      | 2921.61743   | 158.90198    | 50.4153 |
| 2      | 9.614         | MM   | 0.3789      | 2873.47827   | 126.38116    | 49.5847 |

Totals : 5795.09570 285.28314

Signal 4: DAD1 D, Sig=210,8 Ref=360,100

| Peak # | RetTime [min] | Type | Width [min] | Area [mAU*s] | Height [mAU] | Area %  |
|--------|---------------|------|-------------|--------------|--------------|---------|
| 1      | 8.081         | MM   | 0.3086      | 3277.56421   | 177.00522    | 50.8954 |
| 2      | 9.617         | MM   | 0.3721      | 3162.24097   | 141.63374    | 49.1046 |

Data File C:\CHEM32\2\DATA\ZHU\HPLC 2014-07-18 20-26-05\4-215OD950521.D

Sample Name: 4-215OD

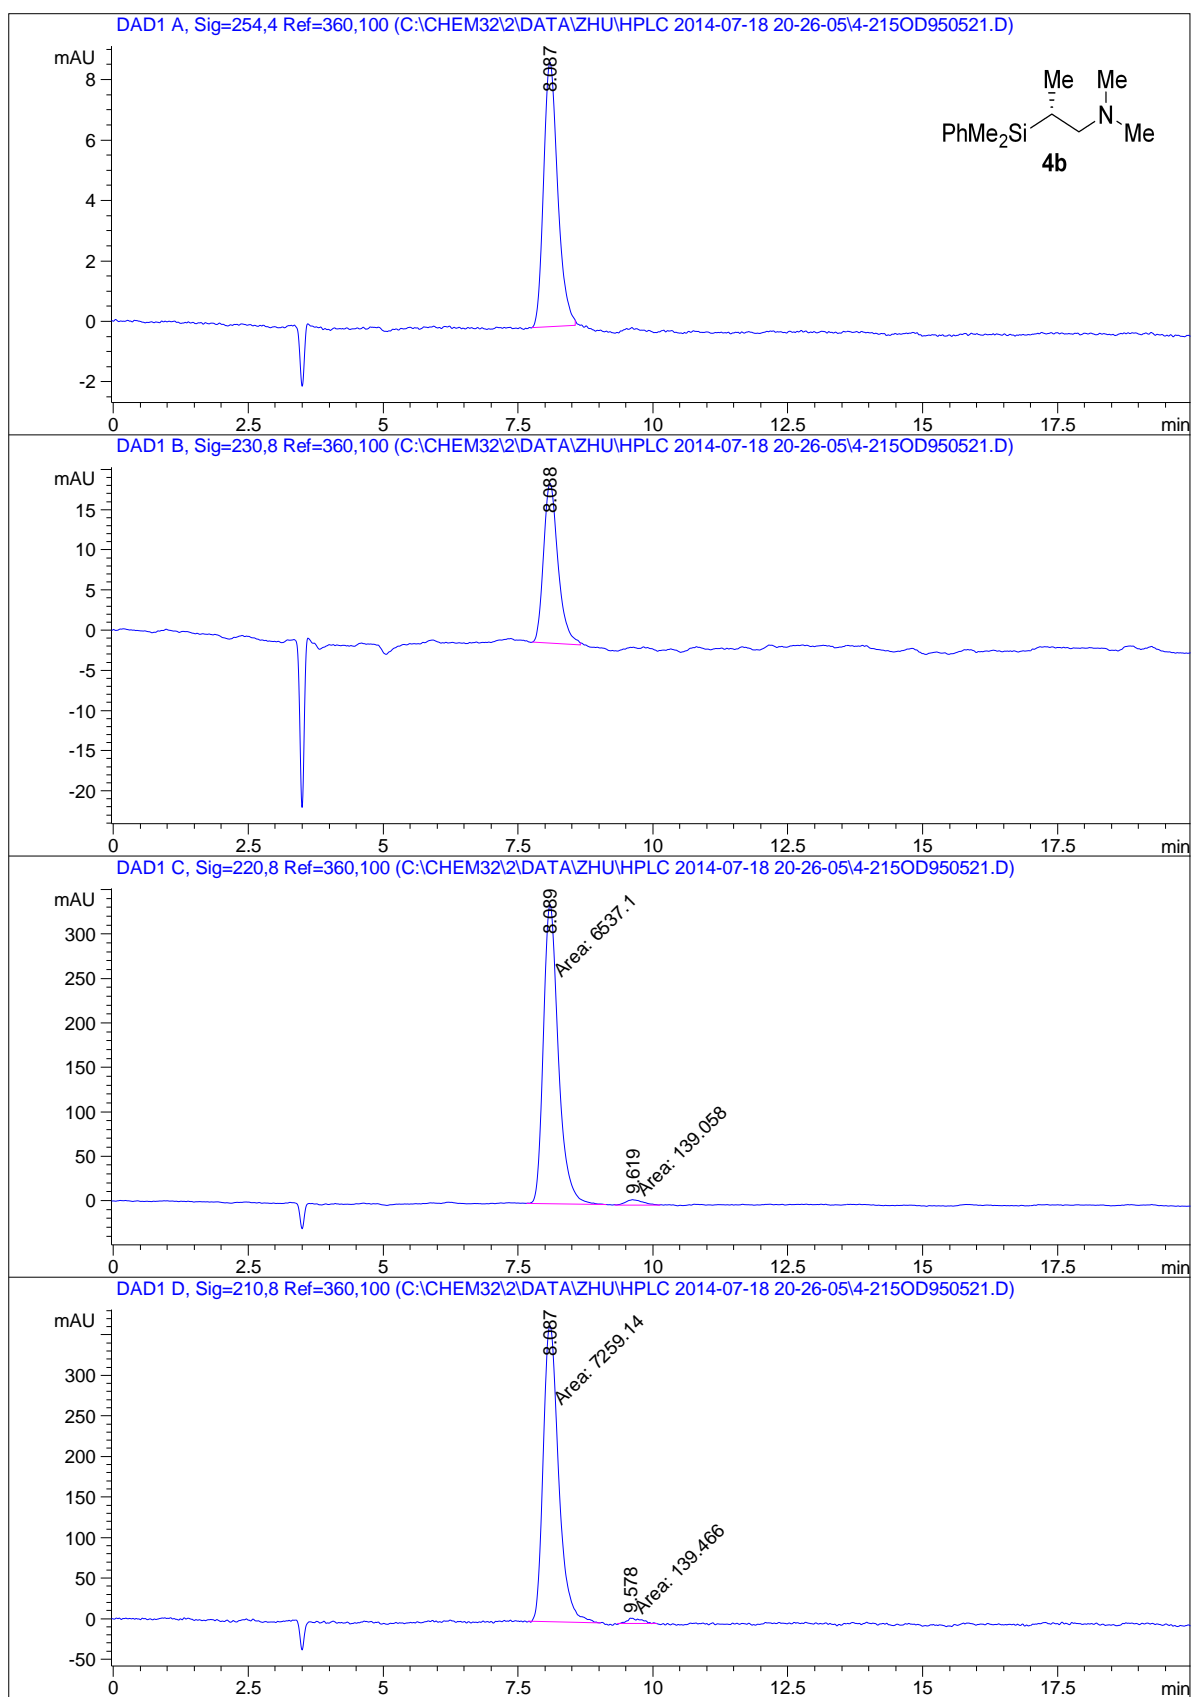

Data File C:\CHEM32\2\DATA\ZHU\HPLC 2014-07-18 20-26-05\4-215OD950521.D  
 Sample Name: 4-215OD

=====  
 Area Percent Report  
 =====

Sorted By : Signal  
 Multiplier: : 1.0000  
 Dilution: : 1.0000  
 Use Multiplier & Dilution Factor with ISTDs

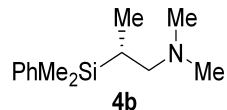

Signal 1: DAD1 A, Sig=254,4 Ref=360,100

| Peak # | RetTime [min] | Type | Width [min] | Area [mAU*s] | Height [mAU] | Area %   |
|--------|---------------|------|-------------|--------------|--------------|----------|
| 1      | 8.087         | BB   | 0.2830      | 159.94376    | 8.76087      | 100.0000 |

Totals : 159.94376 8.76087

Signal 2: DAD1 B, Sig=230,8 Ref=360,100

| Peak # | RetTime [min] | Type | Width [min] | Area [mAU*s] | Height [mAU] | Area %   |
|--------|---------------|------|-------------|--------------|--------------|----------|
| 1      | 8.088         | BB   | 0.2806      | 372.68958    | 19.89025     | 100.0000 |

Totals : 372.68958 19.89025

Signal 3: DAD1 C, Sig=220,8 Ref=360,100

| Peak # | RetTime [min] | Type | Width [min] | Area [mAU*s] | Height [mAU] | Area %  |
|--------|---------------|------|-------------|--------------|--------------|---------|
| 1      | 8.089         | MM   | 0.3234      | 6537.09961   | 336.93506    | 97.9171 |
| 2      | 9.619         | MM   | 0.3763      | 139.05821    | 6.15933      | 2.0829  |

Totals : 6676.15782 343.09439

Signal 4: DAD1 D, Sig=210,8 Ref=360,100

| Peak # | RetTime [min] | Type | Width [min] | Area [mAU*s] | Height [mAU] | Area %  |
|--------|---------------|------|-------------|--------------|--------------|---------|
| 1      | 8.087         | MM   | 0.3312      | 7259.13721   | 365.24109    | 98.1150 |
| 2      | 9.578         | MM   | 0.3311      | 139.46565    | 7.02036      | 1.8850  |

Totals : 7398.60286 372.26145



Data File C:\CHEM32\1\DATA\ZHU\NAOYUKI\_LC 2014-06-18 21-33-25\4-139OJ2E.D

Sample Name: 4-139RAC

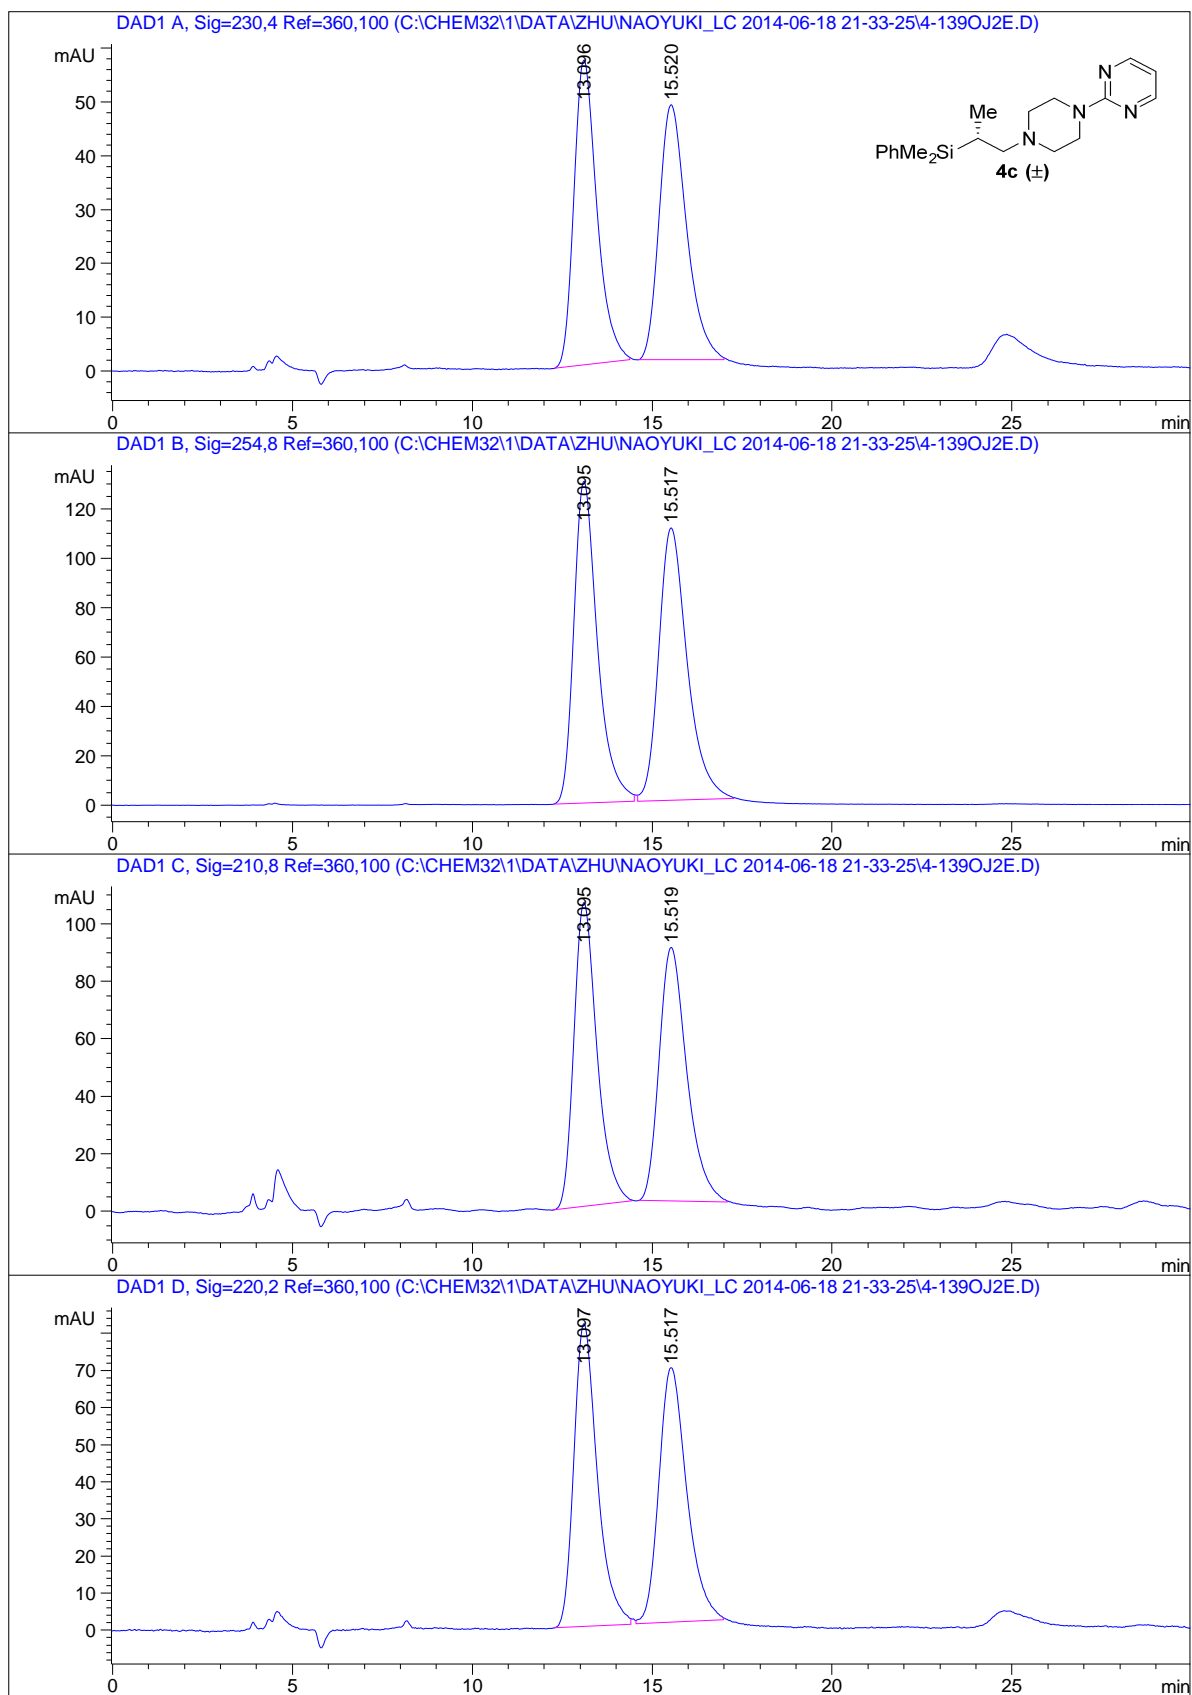

Data File C:\CHEM32\1\DATA\ZHU\NAOYUKI\_LC 2014-06-18 21-33-25\4-139OJ2E.D  
 Sample Name: 4-139RAC

=====  
 Area Percent Report  
 =====

Sorted By : Signal  
 Multiplier: : 1.0000  
 Dilution: : 1.0000  
 Use Multiplier & Dilution Factor with ISTDs

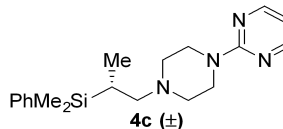

Signal 1: DAD1 A, Sig=230,4 Ref=360,100

| Peak # | RetTime [min] | Type | Width [min] | Area [mAU*s] | Height [mAU] | Area %  |
|--------|---------------|------|-------------|--------------|--------------|---------|
| 1      | 13.096        | BB   | 0.6682      | 2526.35693   | 56.66058     | 50.0174 |
| 2      | 15.520        | BB   | 0.7472      | 2524.59790   | 47.41689     | 49.9826 |

Totals : 5050.95483 104.07747

Signal 2: DAD1 B, Sig=254,8 Ref=360,100

| Peak # | RetTime [min] | Type | Width [min] | Area [mAU*s] | Height [mAU] | Area %  |
|--------|---------------|------|-------------|--------------|--------------|---------|
| 1      | 13.095        | BB   | 0.6898      | 5963.67432   | 130.34309    | 49.4922 |
| 2      | 15.517        | BB   | 0.8152      | 6086.04932   | 110.40014    | 50.5078 |

Totals : 1.20497e4 240.74323

Signal 3: DAD1 C, Sig=210,8 Ref=360,100

| Peak # | RetTime [min] | Type | Width [min] | Area [mAU*s] | Height [mAU] | Area %  |
|--------|---------------|------|-------------|--------------|--------------|---------|
| 1      | 13.095        | BB   | 0.6472      | 4727.47461   | 105.81461    | 50.0075 |
| 2      | 15.519        | BB   | 0.7602      | 4726.05273   | 88.33138     | 49.9925 |

Totals : 9453.52734 194.14599

Signal 4: DAD1 D, Sig=220,2 Ref=360,100

| Peak # | RetTime [min] | Type | Width [min] | Area [mAU*s] | Height [mAU] | Area %  |
|--------|---------------|------|-------------|--------------|--------------|---------|
| 1      | 13.097        | BB   | 0.6118      | 3694.31274   | 81.65907     | 49.9695 |
| 2      | 15.517        | BB   | 0.6647      | 3698.82690   | 68.64277     | 50.0305 |

Data File C:\CHEM32\1\DATA\ZHU\NAOYUKI\_LC 2014-06-18 21-33-25\4-145OJ2E.D

Sample Name: 4-145

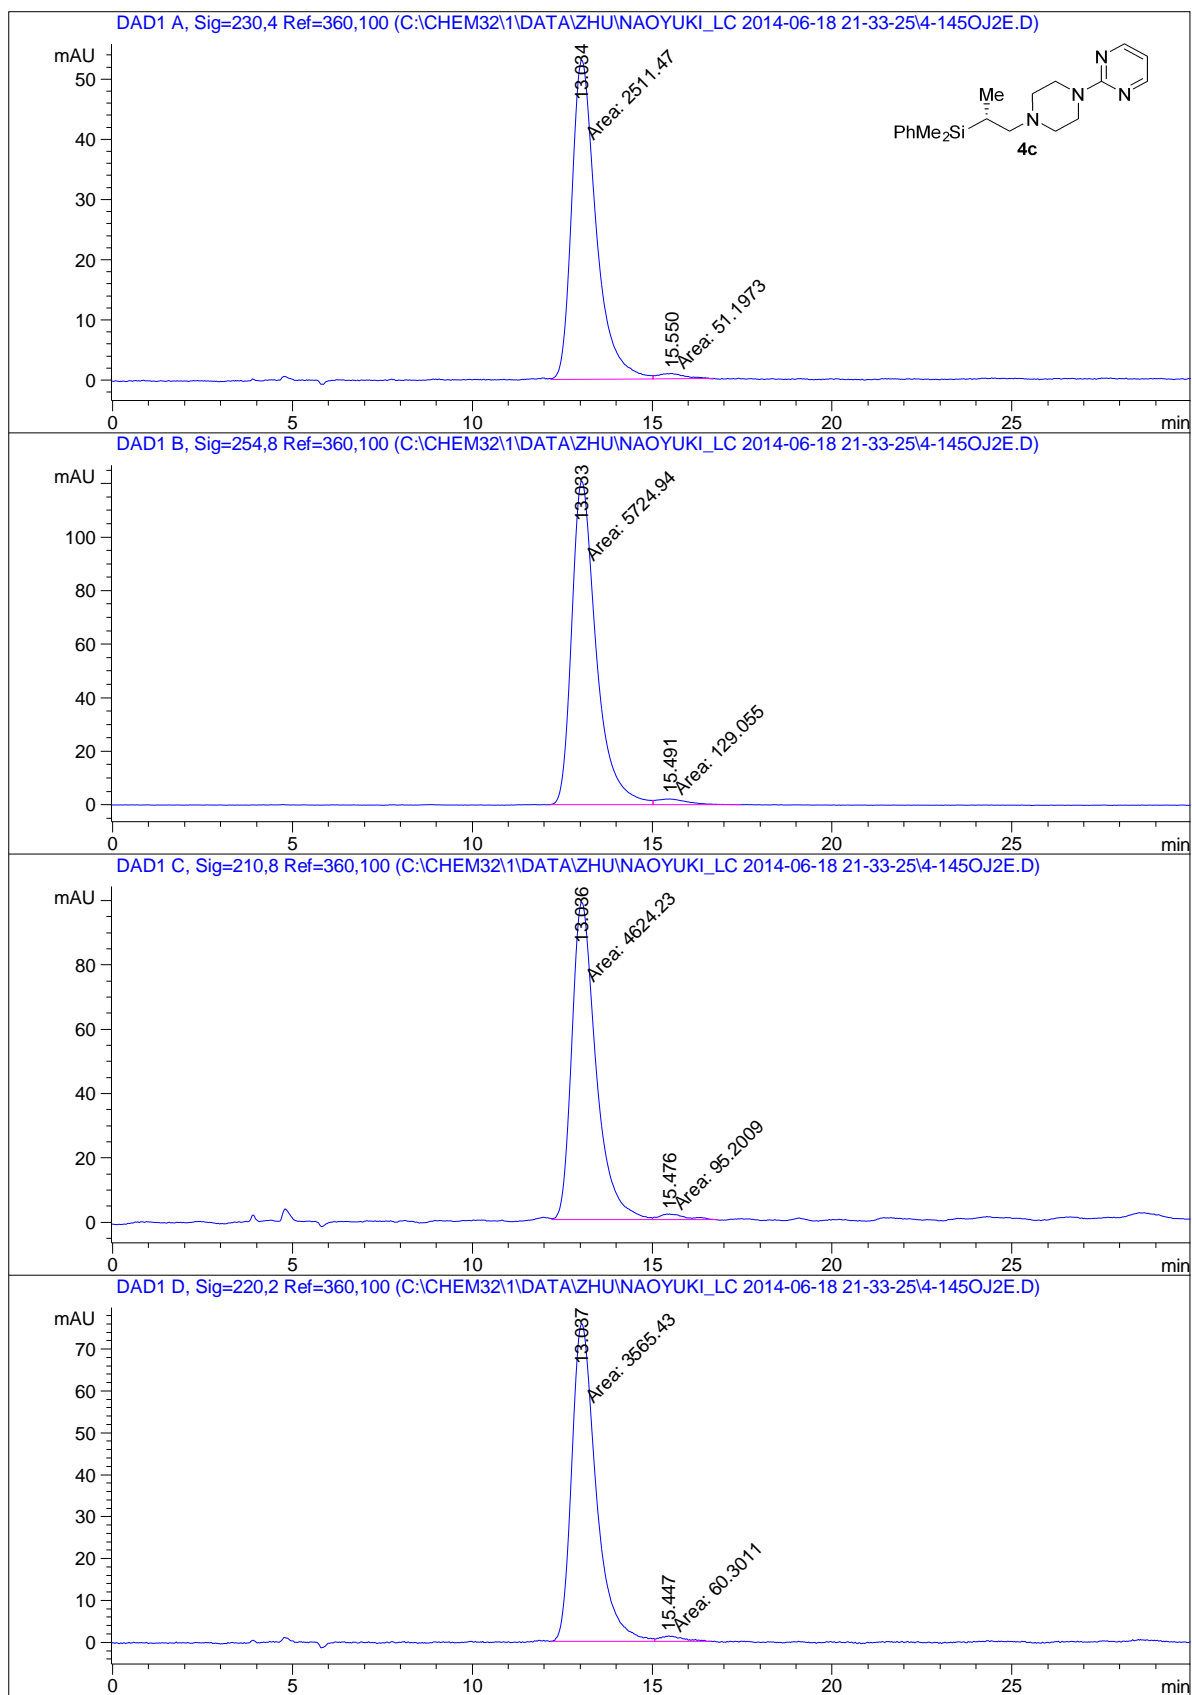

Data File C:\CHEM32\1\DATA\ZHU\NAOYUKI\_LC 2014-06-18 21-33-25\4-145OJ2E.D  
 Sample Name: 4-145

=====  
 Area Percent Report  
 =====

Sorted By : Signal  
 Multiplier: : 1.0000  
 Dilution: : 1.0000  
 Use Multiplier & Dilution Factor with ISTDs

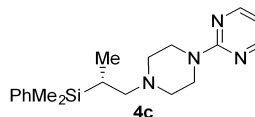

Signal 1: DAD1 A, Sig=230,4 Ref=360,100

| Peak # | RetTime [min] | Type | Width [min] | Area [mAU*s] | Height [mAU] | Area %  |
|--------|---------------|------|-------------|--------------|--------------|---------|
| 1      | 13.034        | MF   | 0.7892      | 2511.46509   | 53.04081     | 98.0022 |
| 2      | 15.550        | FM   | 0.9028      | 51.19725     | 9.45118e-1   | 1.9978  |

Totals : 2562.66234 53.98592

Signal 2: DAD1 B, Sig=254,8 Ref=360,100

| Peak # | RetTime [min] | Type | Width [min] | Area [mAU*s] | Height [mAU] | Area %  |
|--------|---------------|------|-------------|--------------|--------------|---------|
| 1      | 13.033        | MF   | 0.7899      | 5724.94434   | 120.79826    | 97.7954 |
| 2      | 15.491        | FM   | 0.9957      | 129.05489    | 2.16014      | 2.2046  |

Totals : 5853.99922 122.95840

Signal 3: DAD1 C, Sig=210,8 Ref=360,100

| Peak # | RetTime [min] | Type | Width [min] | Area [mAU*s] | Height [mAU] | Area %  |
|--------|---------------|------|-------------|--------------|--------------|---------|
| 1      | 13.036        | MF   | 0.7814      | 4624.22998   | 98.62783     | 97.9828 |
| 2      | 15.476        | FM   | 0.8769      | 95.20088     | 1.80952      | 2.0172  |

Totals : 4719.43086 100.43735

Signal 4: DAD1 D, Sig=220,2 Ref=360,100

| Peak # | RetTime [min] | Type | Width [min] | Area [mAU*s] | Height [mAU] | Area %  |
|--------|---------------|------|-------------|--------------|--------------|---------|
| 1      | 13.037        | MF   | 0.7829      | 3565.42554   | 75.90273     | 98.3369 |
| 2      | 15.447        | FM   | 0.7533      | 60.30106     | 1.33423      | 1.6631  |

Data File C:\CHEM32\1\DATA\ZHU\NAOYUKI\_LC 2014-06-27 23-24-03\4-83.D

Sample Name: 4-83

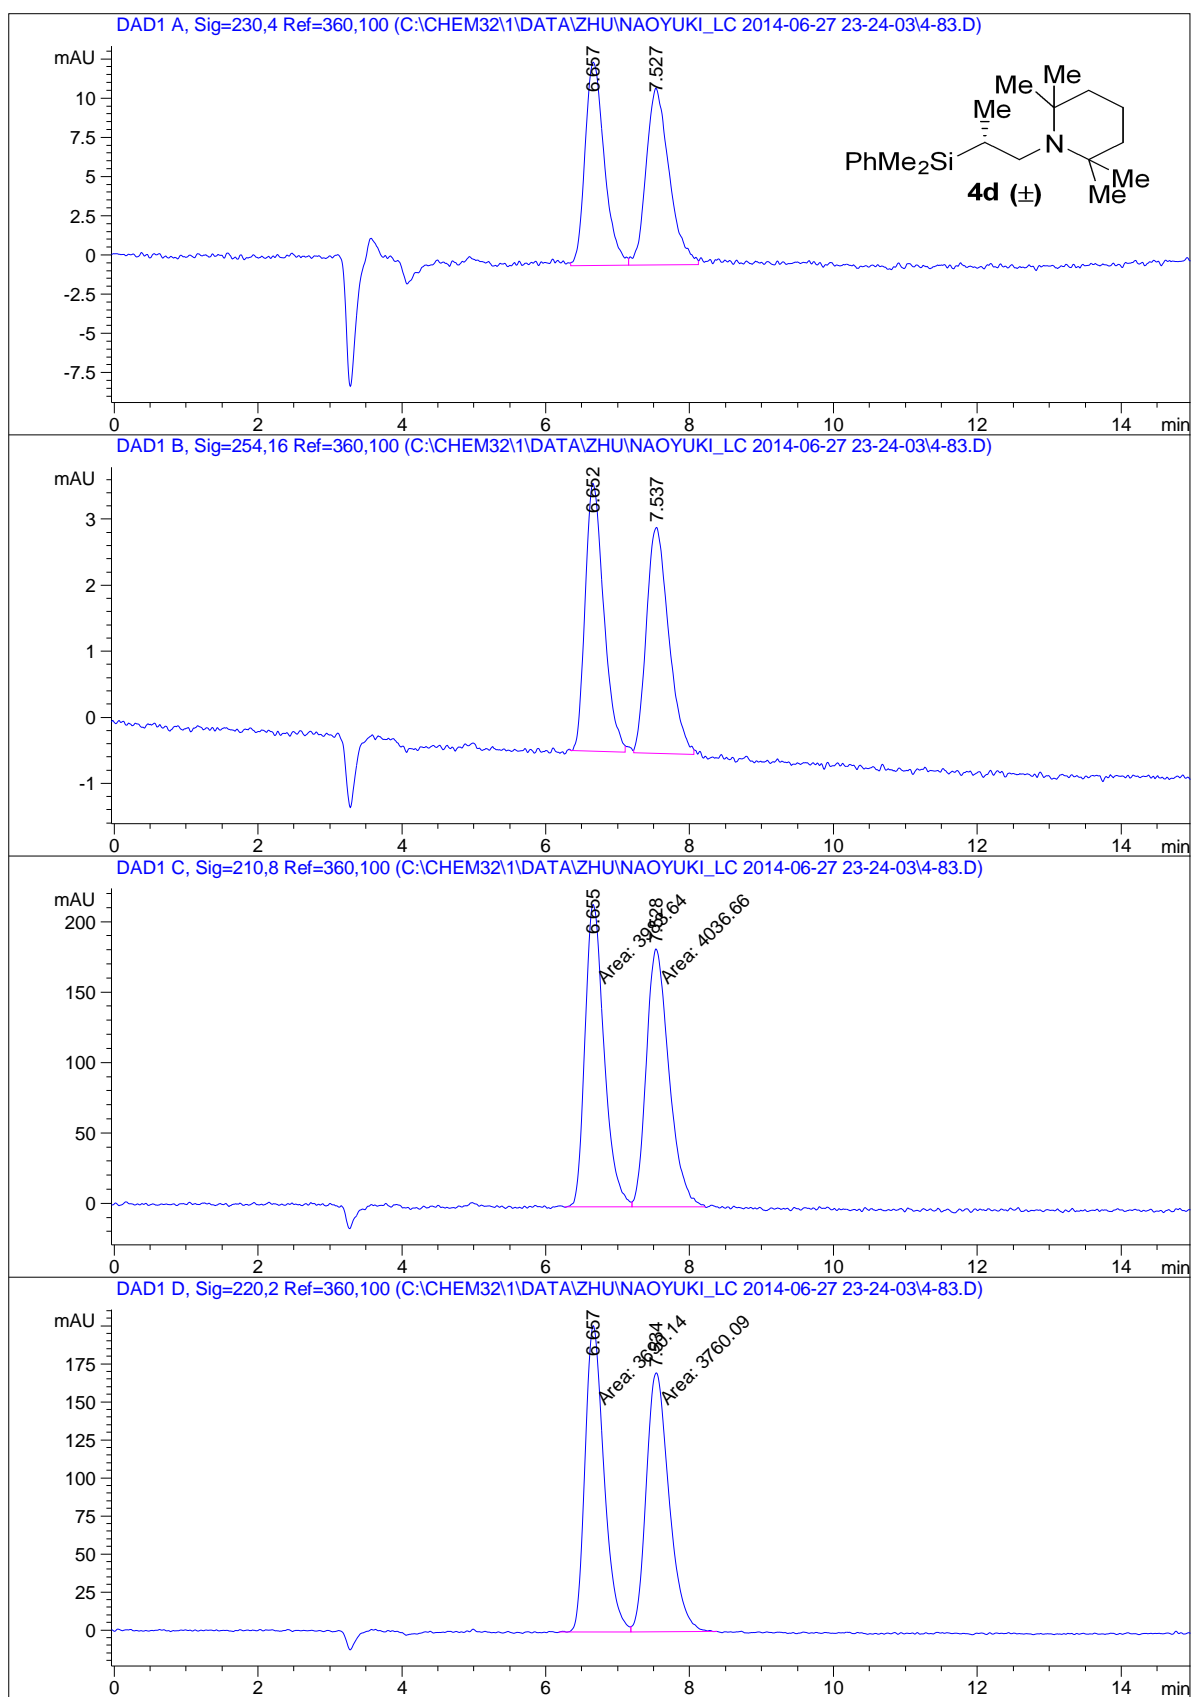

Data File C:\CHEM32\1\DATA\ZHU\NAOYUKI\_LC 2014-06-27 23-24-03\4-83.D

Sample Name: 4-83

 =====  
 Area Percent Report  
 =====

Sorted By : Signal  
 Multiplier: : 1.0000  
 Dilution: : 1.0000  
 Use Multiplier & Dilution Factor with ISTDs

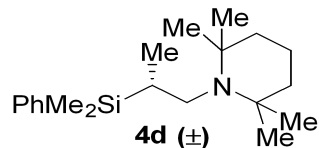

Signal 1: DAD1 A, Sig=230,4 Ref=360,100

| Peak # | RetTime [min] | Type | Width [min] | Area [mAU*s] | Height [mAU] | Area %  |
|--------|---------------|------|-------------|--------------|--------------|---------|
| 1      | 6.657         | BV   | 0.2766      | 243.17319    | 12.97867     | 49.0517 |
| 2      | 7.527         | VV   | 0.3133      | 252.57603    | 11.27599     | 50.9483 |

Totals : 495.74922 24.25467

Signal 2: DAD1 B, Sig=254,16 Ref=360,100

| Peak # | RetTime [min] | Type | Width [min] | Area [mAU*s] | Height [mAU] | Area %  |
|--------|---------------|------|-------------|--------------|--------------|---------|
| 1      | 6.652         | BB   | 0.2777      | 72.95206     | 4.05933      | 49.7557 |
| 2      | 7.537         | BB   | 0.2930      | 73.66839     | 3.42364      | 50.2443 |

Totals : 146.62045 7.48297

Signal 3: DAD1 C, Sig=210,8 Ref=360,100

| Peak # | RetTime [min] | Type | Width [min] | Area [mAU*s] | Height [mAU] | Area %  |
|--------|---------------|------|-------------|--------------|--------------|---------|
| 1      | 6.655         | MF   | 0.3089      | 3983.64282   | 214.93649    | 49.6695 |
| 2      | 7.528         | FM   | 0.3667      | 4036.66064   | 183.46571    | 50.3305 |

Totals : 8020.30347 398.40221

Signal 4: DAD1 D, Sig=220,2 Ref=360,100

| Peak # | RetTime [min] | Type | Width [min] | Area [mAU*s] | Height [mAU] | Area %  |
|--------|---------------|------|-------------|--------------|--------------|---------|
| 1      | 6.657         | MF   | 0.3054      | 3690.13794   | 201.38437    | 49.5306 |
| 2      | 7.534         | FM   | 0.3680      | 3760.08521   | 170.27754    | 50.4694 |

Data File C:\CHEM32\1\DATA\ZHU\NAOYUKI\_LC 2014-06-27 23-24-03\4-85OD9280201.D  
 Sample Name: 4-85

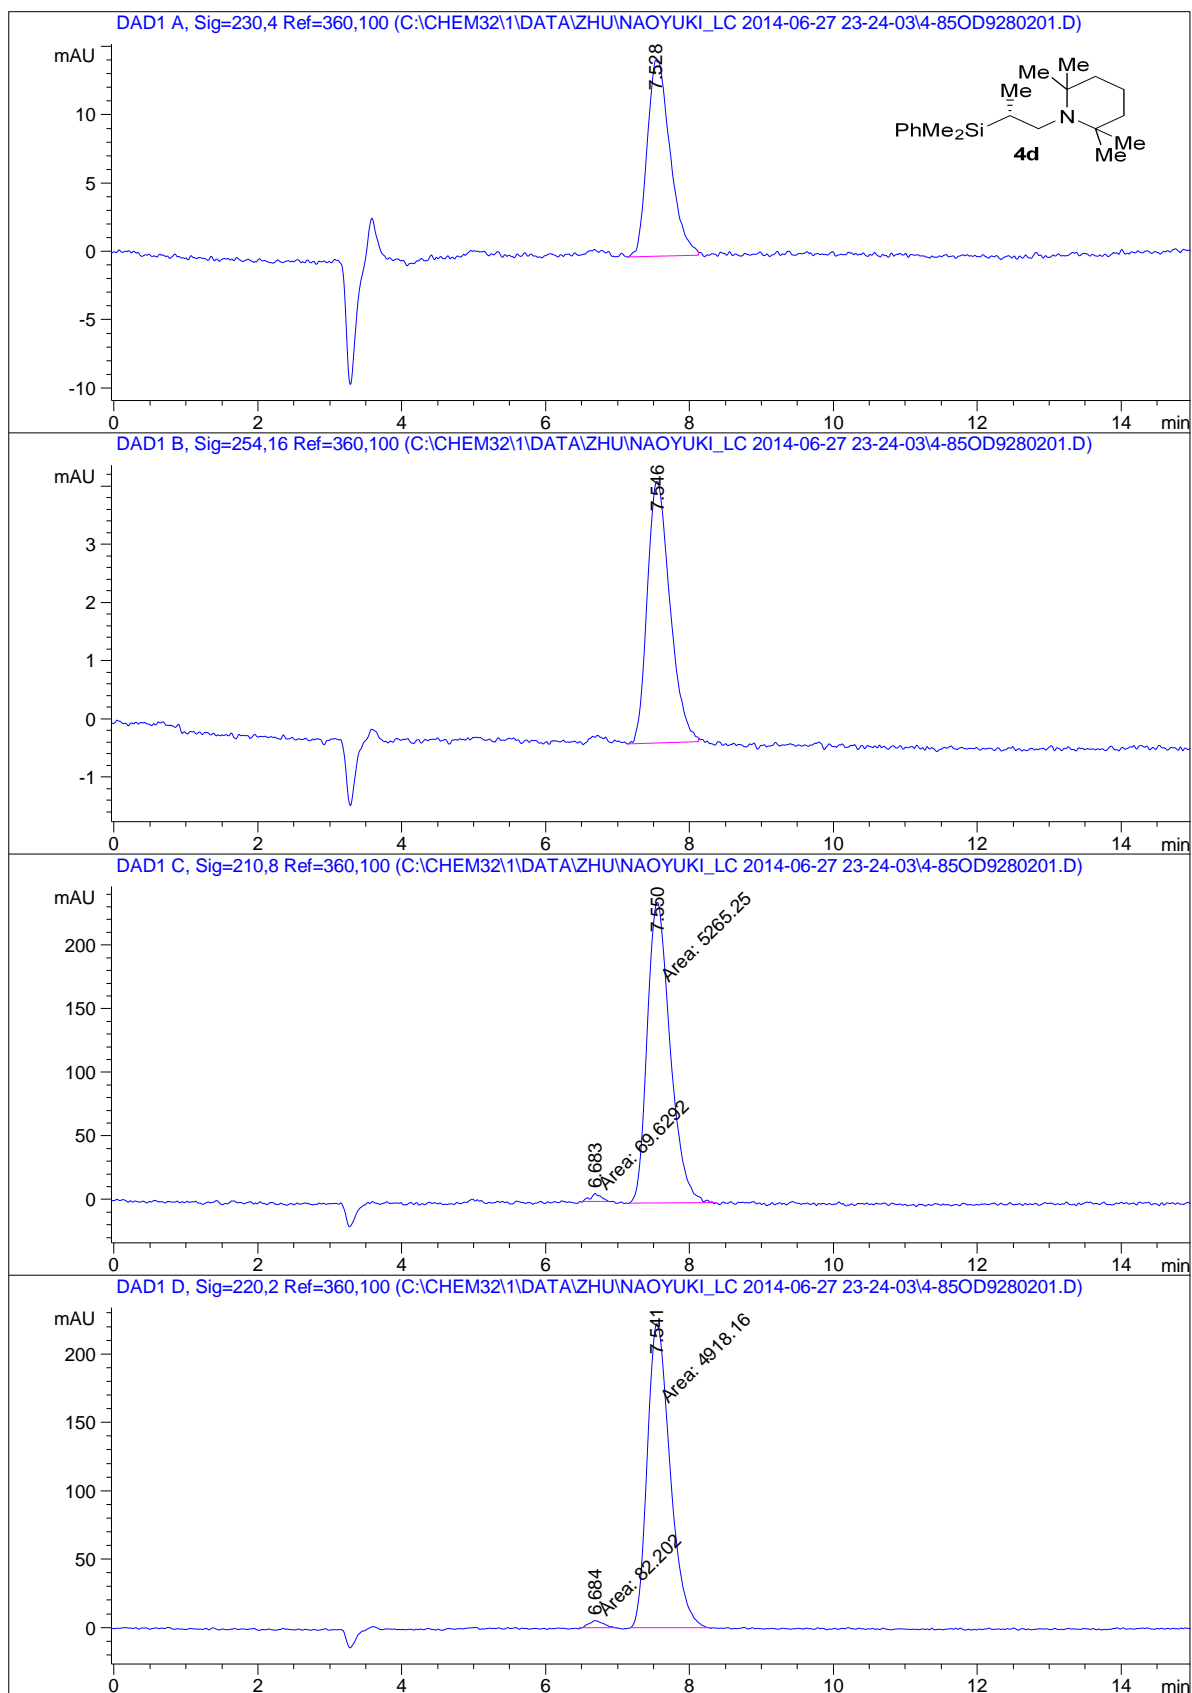

Data File C:\CHEM32\1\DATA\ZHU\NAOYUKI\_LC 2014-06-27 23-24-03\4-85OD9280201.D  
 Sample Name: 4-85

=====  
 Area Percent Report  
 =====

Sorted By : Signal  
 Multiplier: : 1.0000  
 Dilution: : 1.0000  
 Use Multiplier & Dilution Factor with ISTDs

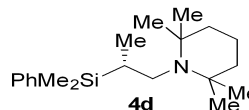

Signal 1: DAD1 A, Sig=230,4 Ref=360,100

| Peak # | RetTime [min] | Type | Width [min] | Area [mAU*s] | Height [mAU] | Area %   |
|--------|---------------|------|-------------|--------------|--------------|----------|
| 1      | 7.528         | VB   | 0.2862      | 320.17859    | 14.35725     | 100.0000 |

Totals : 320.17859 14.35725

Signal 2: DAD1 B, Sig=254,16 Ref=360,100

| Peak # | RetTime [min] | Type | Width [min] | Area [mAU*s] | Height [mAU] | Area %   |
|--------|---------------|------|-------------|--------------|--------------|----------|
| 1      | 7.546         | BB   | 0.3323      | 98.84666     | 4.49972      | 100.0000 |

Totals : 98.84666 4.49972

Signal 3: DAD1 C, Sig=210,8 Ref=360,100

| Peak # | RetTime [min] | Type | Width [min] | Area [mAU*s] | Height [mAU] | Area %  |
|--------|---------------|------|-------------|--------------|--------------|---------|
| 1      | 6.683         | MM   | 0.1787      | 69.62920     | 6.49310      | 1.3052  |
| 2      | 7.550         | MM   | 0.3710      | 5265.25342   | 236.54596    | 98.6948 |

Totals : 5334.88262 243.03906

Signal 4: DAD1 D, Sig=220,2 Ref=360,100

| Peak # | RetTime [min] | Type | Width [min] | Area [mAU*s] | Height [mAU] | Area %  |
|--------|---------------|------|-------------|--------------|--------------|---------|
| 1      | 6.684         | MM   | 0.2499      | 82.20201     | 5.48340      | 1.6439  |
| 2      | 7.541         | MM   | 0.3683      | 4918.15723   | 222.55307    | 98.3561 |

Totals : 5000.35924 228.03647
